# Supplementary material
Source: Research Square preprint supplement (doi:10.21203/rs.3.rs-9212126/v1)
Supplement: Supplementary file 1 [file 34bc8793edd9234fc2f0b195.xlsx]

## Sheet: Analysis dataset
Study ID	Year	Trial registration	Country	Condition	Income level	Funding	Sample size	Study design	Setting	Blinding	Randomisation method	Allocation concealment	ITT reporting	Handling missing data	Statistical outputs (summary)	CONSORT score (n/37)	CONSORT adherence (%)	Overall RoB
1	2021	IRCT20201110049332N1	Iran	PMDD	Upper-middle-income	Not reported	60	Randomized controlled trial	University psychology clinic	Open-label	Random assignment; method not described beyond "randomly divided"	Not described	Yes—full sample analysed (n=60)	No missing data; all 60 completed	Pain reduced from 8.73→2.66 vs control 8.83→8.73; Depression from 33.7→3.9 vs 31.3→32.1; Anxiety from 32.8→4.2 vs 31.0→32.4; Stress from 32.1→4.4 vs 30.9→32.9 (Tables 1–2, pp.6–7)	12	32.4	High risk
2	2013	Not reported	Egypt	PCOS	Lower-middle-income	Self-funded	100	Randomized controlled trial	University outpatient infertility clinic	Not blinded (drug type obvious)	Computer-generated randomization list	Sealed opaque envelopes	Yes (all 100 analyzed)	No missing data (all completed follow-up)	Ovulation: 69.8% vs 48.8% (p=0.002); Pregnancy: 58% vs 34% (p=0.027); Follicles ≥18 mm, E2, progesterone, endometrium all significantly higher in pioglitazone+metformin group	19	51.4	Some concerns
3	2011	Not reported	Egypt	PCOS	Lower-middle-income	None reported	147	Randomized controlled trial	Single centre (Women’s Health Center, Assiut University)	Not blinded	Computer-generated table	Serially numbered opaque envelopes	Not explicitly	7 dropouts (3 LOD; 4 letrozole); no imputation	Ovulation 59% vs 47.5% (p<0.001); endometrium 7.9 vs 6.3 mm (p<0.0001); pregnancy 35.7% vs 28.6%; abortion 8% vs 20%; live birth 32.9% vs 22.9%	18	48.6	Some concerns
4	2012	Not registered	Egypt	PCOS	Lower-middle-income	Not reported	100	Prospective randomized controlled trial	Single tertiary hospital (Kasr Al-Aini Hospital)	Open-label (no blinding reported)	Computer-generated numbers in sealed envelopes	Sealed opaque envelopes	No ITT; completers only	8 withdrawals excluded (4 per group); no imputation	Ovulation: 81.8% vs 55.2% (p<0.001). Pregnancy: 30.4% vs 28.8% (p=0.946). Fasting insulin: 20.4→13.5 mU/mL (p<0.001) with rosiglitazone; no change in CC alone. G:I ratio: improved significantly (p=0.004). (Tables II–III, p.271)	17	45.9	High risk
5	2025	Not reported	Egypt	GDM	Lower-middle-income	Not stated (Fayoum University institutional research)	200	Non-inferiority randomized controlled trial	Multicentre (Fayoum University Hospitals – OB/GYN, Family Medicine, and NICU units)	Open-label (participants and clinicians unblinded; outcome assessors blinded)	Computer-generated randomization (1:1)	Yes – sealed opaque envelopes	Yes	Complete data; no missing data reported	FBS, 2h PPG, HbA1c similar between groups (p>0.05); ↓ neonatal birth weight (3101 vs 3698 g, p<0.001); ↓ NICU admission (8% vs 21%, p=0.01); ↓ maternal hypoglycemia (15% vs 54%, p<0.001); ↑ compliance (84% vs 33%, p<0.001); no difference in preeclampsia or cesarean rate	25	67.6	Some concerns
6	2019	IRCT2016111410324N35	Iran	PCOS	Upper-middle-income	Tabriz University of Medical Sciences (full funding)	74	Randomized controlled clinical trial	Gynecology clinics + Imam Khomeini Hospital, Saqqez	Single-blind (data analyst blinded only)	Block randomization (block size 4 & 6) via random.org	Sequentially numbered opaque sealed envelopes	Yes — stated that all analyses were based on ITT	No missing data — all 74 participants completed follow-up	QoL total score improved: adjusted MD 33.1 (95% CI 28.5–37.8), p<.001. Psychological fatigue reduced: MD –54.8 (95% CI –65.6 to –24.0), p<.001. Significant improvements across all PCOSQ domains (p<.001).	26	70.3	Some concerns
7	2012	Not reported	Egypt	Endometriosis	Lower-middle-income	Not reported	60	Randomized controlled trial	Single tertiary centre (Elshatby Maternity University Hospital, Alexandria)	Open-label	Randomized into 2 groups (method not explicitly stated)	Not reported	Not stated	No imputation; complete-case	Stimulation days higher with letrozole (13.04 vs 12.07, p=0.019); no differences in oocytes, MII %, embryos, fertilization, cleavage; pregnancy 29.6% vs 32.1%	15	40.5	Some concerns
8	2020	ISRCTN44202346	UK	Endometriosis	High-income	IKTF grant; MRC Centre Grant (MR/N022556/1); funders had no role	33	Double-blind randomised controlled pilot trial	Single tertiary hospital (Royal Infirmary of Edinburgh)	Double-blind; visually identical capsules	Independent statistician; block randomisation (4 & 6); 1:1	Sequentially numbered opaque sealed envelopes	Yes (all with baseline + 8-week data included)	No imputation; missing data not replaced	No significant difference between arms (underpowered); both groups showed improvement trends in pain & QoL; recruitment 45%; retention 81.8%	28	75.7	Some concerns
9	2018	IRCT2016101030248N1	Iran	PCOS	Upper-middle-income	Urmia University of Medical Sciences	44	Randomized placebo-controlled clinical trial	Academic outpatient clinic (Urmia Motahhari Hospital)	Single-blind (investigator blinded; participants not blinded)	Random assignment into vitamin D vs placebo; method not fully described	Placebo capsules identical in appearance; allocation not described beyond sealed identical capsules	No — per protocol only (MCAR test justified)	Per-protocol analysis; dropouts (18%) excluded; no imputation	FPG decreased: −7.67 mg/dL vs +1.71 mg/dL (p=.001). HOMA-B increased: +129.8 vs +48.3 (p=.014). Adiponectin increased significantly (p=.001). 25(OH)D increased: +28.24 ng/mL vs +3.55 ng/mL (p=.001). HOMA-IR unchanged (between-group p=0.25). Visceral fat unchanged (p=.30).	21	56.8	Some concerns
10	2010	ISRCTN36808716	Egypt	PCOS	Lower-middle-income	Sponsored in part by IBSA Institut Biochimique SA	84	Prospective randomized controlled trial	Single large IVF center	Open-label	Sequentially numbered sealed envelopes selected by independent nurse	Yes – third-party prepared sealed envelopes	Yes – ITT explicitly stated	Not reported	No difference in mature oocytes or pregnancy rates; urinary FSH resulted in higher fertilization rate (74.5% vs 63.0%, p=0.021), more top-quality embryos, and more cryopreserved embryos	24	64.9	High risk
11	2013	Not reported	Egypt	PCOS	Lower-middle-income	None reported	106	Randomized controlled trial	Single tertiary infertility clinic	None (open-label)	Computer-generated list of random numbers	Sequentially numbered sealed opaque stapled envelopes (page 2)	No	Complete-case analysis only	Biochemical pregnancy: 7.4% vs 11.1% vs 18.5% (NS); mature follicles: 74.1% vs 74.1% vs 81.5% (NS); adverse events similar	18	48.6	Some concerns
12	2011	ACTRN12610000619044	Egypt	PCOS	Lower-middle-income	No specific funding	188	Parallel randomized controlled trial	University hospital and private practice	Outcome assessors blinded; participants not blinded	Computer-generated random numeric table	Yes – sealed opaque envelopes; third-party nurse assignment	Not explicitly stated	Complete-case analysis; no losses to follow-up	Clinical pregnancy/cycle: 8.49% (22/259) vs 7.89% (21/266), p=0.26. Clinical pregnancy/woman: 23.6% vs 22.1%, p=0.33. Ovulation/woman: 77.4% vs 76.8%, p=0.57. Ovulation/cycle: 52.1% vs 51.5%, p=0.64. Endometrial thickness (hCG day): 7.7±0.4 vs 7.5±0.6 mm, p=0.54. Miscarriage rate: 18.1% vs 19.0%, p=0.31. Live birth rate: 19.35% vs 17.89%, p=0.33. Twin pregnancy: 9% in both groups. OHSS: 0% in bot…	27	73	Some concerns
13	2012	ClinicalTrials.gov NCT01334762	Egypt	Endometriosis	Lower-middle-income	No special funding	136	Parallel-group randomized controlled trial	University teaching hospital + private practice	Outcome assessors blinded (not participant-blinded)	Computer-generated random numeric table	Sealed opaque envelopes assigned by third party	Yes (ITT explicitly stated)	Dropouts reported; ITT and per-protocol analyses performed	Clinical pregnancy/cycle (ITT): 15.9% (35/220) vs 14.5% (31/213), RR 0.91 (95% CI 0.44–1.62), p=0.82. Cumulative pregnancy (4 cycles, ITT): 64.7% vs 57.2%, p=0.71. Live birth rate: 44.9% vs 40.3%, RR 0.89 (0.43–1.58), p=0.62. Follicles ≥18 mm: 1.4±0.2 vs 2.8±0.4, p=0.042. Serum E2 at hCG day: 271±62 vs 486±81 pg/mL, p=0.022. Miscarriage: 11.4% vs 12.9%, p=0.47.	28	75.7	Some concerns
14	2012	ISRCTN69937179	USA	PCOS	High-income	Investigator-Initiated Studies Program, Merck Sharp & Dohme Corp.	140	Prospective randomized controlled trial (parallel)	Two academic IVF centers	Physicians blinded; nurses and patients not blinded	Computer-generated random number list (even/odd assignment)	Yes – sequentially numbered, sealed, opaque envelopes prepared by independent assistant	Yes – ITT pregnancy outcomes reported	Cancellations described; ITT applied for pregnancy outcomes	Overall implantation rate: 46.3% vs 35.5% (p=0.075). Blastocyst implantation: 55.1% vs 40.4% (p=0.051). Clinical pregnancy/ET: 68.3% vs 56.5% (NS). Delivery/ET: 60.0% vs 51.6% (NS). Biochemical pregnancy: 2.4% vs 18.6% (p=0.015). Severe OHSS: 8.3% vs 6.5% (NS). Mature oocytes: 16.2±7.7 vs 14.0±5.7 (p=0.039). 2PN embryos: 12.6±6.3 vs 10.4±4.9 (p=0.017).	27	73	Some concerns
15	2021	EudraCT: 2008-005744-17	Spain	Endometriosis	High-income	Fondo de Investigaciones Sanitarias (FIS PI07/0417, PI10/01815)	31	Randomized clinical trial	single-centre University hospital	Not explicitly reported	Strict randomization, method not detailed	Not explicitly reported	Not explicitly reported	Not explicitly reported	Improvement in VAS and CA-125, recurrence rates, reoperation rates, fertility outcomes	14	37.8	High risk
16	2009	Not reported	Austria / Switzerland	PCOS	High-income	Land Salzburg; Spar Austria	40	Randomized, double-blind, placebo-controlled trial	Tertiary referral endocrine/gynecology center	Double-blind (participants and physicians)	Randomization after run-in phase (method not specified)	Yes – identical placebo tablets	Not explicitly stated	Complete-case analysis (35/40 completed)	Adiponectin: ↑ from ~6.2±3.9 → 7.8±2.5 µg/mL with pioglitazone (p=0.003); no change placebo (p=0.985). RBP4: 22.4±5.3 → 19.9±5.2 mg/dL (trend, p=0.06); placebo NS (p=0.381). Visfatin: no change (p=0.873). Fasting insulin: 68.3±9.7 → 53.2±5.3 pmol/L (p<0.02 vs placebo). Insulin AUC: 51,615±6,910 → 33,506±3,732 pmol·min/L (p<0.02 vs placebo). HOMA-IR: 16.1±2.1 → 12.6±1.1 (p<0.02 vs placebo). Insuli…	20	54.1	Some concerns
17	2019	IRCT201509295563N7	Iran	PCOS	Upper-middle-income	Tabriz University of Medical Sciences; Iran National Science Foundation (INSF); Ministry of Health and Medical Education (Iran)	75	Randomized, single-blind, parallel-group clinical trial	Single-centre (Women’s Reproductive Health Research Center, Tabriz University of Medical Sciences)	Single blind (statistician blinded; participants and treating clinicians not blinded)	Random Allocation Software (block sizes 3 and 6)	Sequentially numbered, opaque, sealed envelopes	not reported	not reported	Antioxidants: — CAT ↑ in herbal (aMD 9.0) and combo (aMD 12.2) — GPx ↑ in herbal (aMD 986) and combo (aMD 1781) — SOD ↑ in herbal (aMD 55.1) and combo (aMD 55.9) — MDA ↓ within groups 2 & 3 but not significant vs CC alone Glycemic markers: — FBS ↓ significantly in combo group (aMD –8.7) — Insulin ↓ in herbal group (aMD –5.6) — HOMA-IR ↓ in herbal group (aMD –1.3)	18	48.6	High risk
18	2015	NCT018557631	Pakistan	GDM	Lower-middle-income	Self-funded + hospital support	150	Prospective randomized open-label clinical trial	Two public hospitals + private clinic (urban)	Not blinded	Odd/even assignment at enrollment	None (open-label)	No	Per-protocol; dropouts excluded	Maternal: weight gain 9.8 kg vs 12.5 kg (p<0.000); Preeclampsia: 3.1% vs 8%; Neonatal: birthweight 3.3–3.4 vs 3.7 kg (p<0.01); NICU >24h 3–5% vs 17% (p<0.05); Neonatal hypoglycemia 4–12% vs 21%	21	56.8	High risk
19	2024	IRCT20221106056417N1	Iran	PCOS	Upper-middle-income	Tehran University of Medical Sciences (Grant 1402-1-371-64482)	56	Triple-blind RCT (participants, researchers, statisticians)	Single fertility clinic (Omid Fertility Clinic, Tehran)	Triple-blind: participants, clinicians, statisticians	Balanced block randomisation (block size 4)	Sequentially numbered sealed opaque envelopes	No (per-protocol analysis)	4 dropouts in each arm; complete-case analysis only	Significant reductions in TOS (P=0.0142) & OSI (P=0.0039); ↑ TAC (P=0.0009); ↑ PGC-1α & TFAM gene expression; ↑ SIRT1 & PGC-1α protein; ↑ mtDNA copy number (P<0.0001); ↑ ATP (P=0.0014); ↑ oocyte maturation (P=0.0012) & high-quality embryos (P=0.0013); no significant difference in chemical or clinical pregnancy rates	29	78.4	Some concerns
20	2021	NCT02328404	Jordan	PCOS	Upper-middle-income	Al-Hayat Pharmaceutical Company; University of Jordan	60	Randomized controlled trial (parallel)	Single-centre (King Abdullah University Hospital, Jordan)	Double-blind (participants, researchers, clinicians)	SPSS-generated random numbers	Allocation performed via matching vitamin D vs placebo lot numbers; pharmacy-controlled	No explicit ITT stated; analysis based on 29 per arm (complete-case)	Complete-case analysis (2 dropouts removed; no imputation)	Vitamin D: ↑25(OH)D (12.5→48.2 ng/mL), ↓FAI (P=0.03), ↓hirsutism score (16.5→11.5; P<0.01), ↓PTH; placebo unchanged; 24% normalized ovaries vs 0% baseline; 93% menstrual regularity vs 10% baseline	28	75.7	Some concerns
21	2017	NCT01058772	Italy, Slovenia, Israel	GDM	High-income	Institute for Maternal & Child Health–IRCCS Burlo Garofolo (human + financial resources)	425	Multicentre open-label RCT	8 teaching hospitals	Open-label (impossible to blind participants/clinicians); outcome assessors not explicitly blinded	Centralised computer-based randomisation; blocked & stratified by centre	Sealed consecutively numbered opaque envelopes	Yes – explicitly ITT	Crossovers retained under ITT; no imputation	CS 12.6% vs 11.8% (RR 1.06, 95% CI 0.64–1.77, P=0.81); non-spontaneous delivery 21% vs 22.3%; neonatal hyperbilirubinaemia higher in induction (10% vs 4.1%, RR 2.46, P=0.03); no maternal/perinatal deaths	30	81.1	Some concerns
22	2021	IRCT20191016045131N1	Iran	PCOS	Upper-middle-income	Shahid Sadoughi University of Medical Sciences (student thesis support)	62	Randomized controlled trial (double-blind)	Single-centre (Diabetes Research Center, Yazd)	Double-blind (participants + investigators)	Simple randomization using random allocation software	Participant assignment performed by trained staff; identical capsules used	Yes, ITT noted by authors	ANCOVA adjusted for baseline + WC change; complete-case for those completing; no imputation described	LAP: −1.1 vs −4.0 (P=0.45); AIP: 0.00 vs −0.09 (P=0.14); AC: −0.2 vs −0.8 (P=0.06); Castelli II: −0.2 vs −0.6 (P=0.07). No significant between-group differences	26	70.3	Some concerns
23	2020	Not registered	Syria & Jordan	PCOS	Mixed Income	Applied Science Private University (full financial support)	118	Randomized controlled trial	Multi-centre (community pharmacies in Damascus & Amman)	No blinding (open-label)	Computer-generated list (randomizer.org)	Not described	No (all analyses per-protocol; no imputation)	No imputation; all 118 completed follow-up	Active group improved anxiety (−4.5 Syria; −3.6 Jordan) and depression scores; control groups no change; high baseline prevalence (anxiety 95–98%; depression 65–83%)	23	62.2	High risk
24	2022	NCT03244579	Jordan	GDM	Upper-middle-income	Deanship of Academic Research, University of Jordan (Grant 2017-2016/165)	75	Parallel 3-arm RCT	Two tertiary hospitals (Jordan University Hospital; Al-Bashir Hospital)	Participants and investigators unblinded (dietary study); outcome assessors blinded	Website-generated random numbers; block size 9; stratified by pre-pregnancy BMI	Independent statistician generated sequence; allocation concealed	No ITT; per-protocol (70/75 analysed)	No imputation; losses described	FBG significantly lower in intervention arms (78.5–80.9 vs 86.7 mg/dl, P=0.021); Insulin levels significantly lower in DASH+CC group (P=0.026); HOMA-IR lowest in DASH+CC (P=0.038); 1-h PG significantly lower (P<0.001); insulin therapy required in 13% vs 41.7% control (P=0.026)	25	67.6	Some concerns
25	2005	Not reported	USA	PCOS	High-income	Not reported	36	Randomized controlled trial, parallel-group	Multicentre: pediatric endocrine & adolescent clinics (USA)	Single-blind (participants & outcome assessors); treating clinicians unblinded (page 3)	Random numbers table (page 3)	Yes – concealed assignments held until randomization (page 3)	Yes – ITT appears applied although not explicitly named	Missing observations allowable in ML model; dropouts excluded from follow-up analysis (page 3)	Significant ↓ free testosterone (χ²=28.4, p<0.0001); BMI ↓ in both groups (p=0.0026); G/I ratio improved (p<0.005); QUICKI improved (p<0.0005); no differences between groups in pattern of change; acne improved only in OCP group (not significant after correction). (Pages 4–6)	19	51.4	Some concerns
26	2013	Not registered	Iran	Endometriosis	Upper-middle-income	Minimally Invasive Surgery Research Center, Rasool Akram Hospital, Tehran University of Medical Sciences	60	Prospective randomized controlled trial	Single tertiary gynecologic surgery center	Double-blind claimed, but method indicates not blinded	Alternating assignment by order of admission; not true random sequence	None; allocation predictable	No	No imputation; per-protocol only	Both groups: significant within-group pain reduction (all p<0.001). Between-group differences NS (p>0.05). Example: pelvic pain post-treatment 1.97 ± 2.04 (simvastatin) vs 2.83 ± 2.00 (GnRH), p=0.083.	13	35.1	High risk
27	2016	IRCT2013021912151N3	Iran	Endometriosis	Upper-middle-income	Departmental sources; Iran University of Medical Sciences (Grant 93-02-140-24388)	39	Double-blind randomized controlled trial	Single tertiary university hospital	Double-blind (participants and investigators)	Simple randomization	Not explicitly described; identical capsules provided	No ITT; per-protocol analysis	1 dropout; no imputation	No significant differences at 24 wks: Pelvic pain 0.84±1.74 vs 0.68±1.70 (p=0.513). Dysmenorrhea 2.10±2.33 vs 2.73±2.84 (p=0.45). No between-group differences at baseline or mid-point (Table 2, p.4964)	17	45.9	Some concerns
28	2015	ClinicalTrials.gov NCT01919281	Norway	PCOS	High-income	Norwegian Fund for Research in Sports Medicine	31	Three-arm parallel randomized controlled trial (pilot)	University hospital & exercise physiology research centre	Exercise unblinded; FMD assessor blinded	Computer-generated random numbers; stratified by BMI (<27 vs ≥27 kg/m²)	Yes – centralized university randomization unit	Yes – analyzed by randomized group	Complete-case analysis; mixed attendance allowed	Primary outcome: HOMA-IR improved only after HIIT: −0.83 (95% CI −1.45 to −0.20), p=0.014 vs control. Insulin (HIIT): −3.0 μIU/mL (95% CI −6.0 to −0.03). HDL (HIIT): +0.20 mmol/L (95% CI 0.02–0.50), p=0.04. FMD (HIIT): +2.0% (95% CI 0.1–4.0). Fat %: ST −1.6% (95% CI −2.5 to −0.7); HIIT −0.9% (95% CI −1.8 to −0.01). Fat-free mass (ST): +1.2 kg (95% CI 0.4–2.1). AMH (ST): −14.8 pmol/L (95% CI −21.2…	28	75.7	High risk
29	2007	Not reported	United Kingdom	PCOS	High-income	Not reported	20	Prospective randomized controlled trial	University hospital gynecology & reproductive medicine units	Not blinded (surgical intervention)	Allocation by sealed envelopes (even numbers = unilateral; odd numbers = bilateral)	Yes – sealed envelopes	Not stated	Complete-case analysis; all randomized followed	Pregnancy: 7 pregnancies in 5/10 women (50%) unilateral vs 7 pregnancies in 6/10 women (60%) bilateral. Menstrual resumption: 9/10 women in each group. Spontaneous ovulation: 2/10 unilateral vs 1/10 bilateral. CC resistance persisted: 4/10 in each group. Hormones (bilateral group): LH 17.9±8.2 → 10.0±6.6 IU/L (p=0.01); Testosterone 3.8±2.9 → 2.3±1.2 nmol/L (p=0.01); Estradiol 258.3±77.7 → 196.0±8…	16	43.2	High risk
30	2023	Not reported	Iraq	PCOS	Upper-middle-income	Not reported	100	Randomized controlled clinical trial	Single-center (Maternity & Children Teaching Hospital, Adiwaniyah)	Open-label (no masking)	Simple randomization	None—open-label	No ITT—per-protocol only (n=100 analyzed)	No imputation reported	Ovulation: 72% CC vs 86% letrozole (p=0.086); Pregnancy: 18% vs 22% (p=0.617); Time to ovulation shorter in letrozole (17.2 vs 24.1 days, p<0.001); Side effects rare and similar	20	54.1	Some concerns
31	2018	NCT004515 (patients), NCT01995773 (controls)	Denmark	PCOS	High-income	Multiple foundations (Jacob Madsen, Olga Madsen, AP Møller, Novo Nordisk Foundation, etc.); OCP & metformin tablets sponsored by Sandoz (not involved in design)	90	Randomized controlled trial	University endocrine & gynecology departments	Open-label	Method previously published; randomization performed after baseline exam	Not described	No (secondary HRQoL outcome; per-protocol only)	65/90 completed; dropouts reported; no imputation	PCOS-VAS improved in all groups (p<0.05). OCP and M+OCP superior to metformin for facial hirsutism (PCOS-VAS1). SF-36 domains mostly unchanged across groups. Weight loss greatest in metformin (−3 kg). FAI improved most in M+OCP.	22	59.5	High risk
32	2009	NCT00220545	UK	PCOS	High-income	University of Sheffield (Devolved funds)	72	Randomized controlled trial	Single reproductive medicine centre	Open-label	Block randomization using pharmacist-generated random numbers	Central telephone allocation; concealed until assignment	Yes — ITT stated and used	Minimal missing data; 7 conceived before treatment; 1 postponed; remaining 65 analysed	ITT: cumulative pregnancy at 12 months 56% (LOD) vs 64% (CC), OR 1.4 (0.6–3.6); Pregnancy after primary treatment 27% vs 44% (P=0.13); Miscarriage 12% vs 10%	27	73	Some concerns
33	2017	NCT00478504	UK	PCOS	High-income	Derby Hospitals NHS Foundation Trust; University of Nottingham	159	Double-blind randomized controlled trial with crossover	Single fertility unit (Derby Teaching Hospitals, UK)	Double-blind (participants, investigators, nurses, sonographers, statisticians)	Mixed block sizes; stratified by BMI (<30 vs 30–35); independent pharmacist generated list	Yes—capsules identical; pharmacist-held allocation; investigators blinded	Yes—primary analysis ITT	Lost-to-follow-up counted as not pregnant in ITT; complete-case for PP; no imputation	Pregnancy rate 61.2% vs 43.0% (P=0.022); live birth 48.8% vs 35.4% (NS); per-cycle pregnancy 19% vs 12% (P=0.036); cycle-to-pregnancy shorter (4 vs 6 cycles, P=0.038)	29	78.4	Some concerns
34	2020	IRCT201504146917N2 (2015-10-03)	Iran	PCOS	Upper-middle-income	Iran University of Medical Sciences (Grant 94-03-28-26521)	70	Randomized, triple-blinded, placebo-controlled clinical trial	Multi-clinic within a single university system (gynecology/infertility/endocrinology clinics)	Triple-blind	Block randomization (block size 6) using STATA	Pharmacognosy expert held code; investigators, participants, and statistician blinded	Yes — stated ITT	Excluded if >15% capsules missed; some dropout before analysis; complete-case after ITT specification	−1.67 kg weight; −0.64 BMI; ↓WC −1.26 cm; ↓FBS −4.23 mg/dl; ↓insulin −2.81 mIU/L; ↓HOMA-IR −0.69; ↑QUICKI +0.021; p<0.001 for key outcomes	24	64.9	Low risk
35	2021	IRCT201106296917N1	Iran	Endometriosis	Upper-middle-income	not specified	60	Randomized, triple-blind, placebo-controlled clinical trial	Single hospital centre (Sarem Hospital, Tehran)	Triple-blind (participants, researchers, statistician)	Simple randomization (draw lots method)	Assignment by independent personnel, coded boxes to conceal group allocation	not reported	not reported	MDA: decreased significantly (p=0.002), ROS decreased (p<0.001), TAC unchanged; VAS pain scores significantly reduced in treatment group vs placebo (p<0.001)	15	40.5	Some concerns
36	2020	IRCT201702071281N2	Iran	PCOS	Upper-middle-income	Shahid Beheshti University of Medical Sciences (research funding)	200	6-arm crossover RCT with two 6-month treatment periods per participant	Single specialist endocrine outpatient clinic (RIES, Shahid Beheshti Univ.)	Clinical examiner and data analyst blinded; participants not explicitly blinded to pill type	Computer-generated block randomization (block size = 6), stratified by sequence (page 3)	Allocation sequence prepared by independent statistician; assignment by research assistant	Yes — ITT stated and applied	GEE model handles longitudinal missing data; dropout noted but partly mitigated	CPA improved total QOL vs LNG at 6 months: β = 25.88 (95% CI 0.99–50.77), p = 0.042 (Table 3). No significant differences for DSG/DRSP or in domains at 3–6 months	18	48.6	High risk
37	2025	NCT05037526	Switzerland	GDM	High-income	University of Bern; Swiss Diabetes Foundation; Dexcom devices provided free	302	Open-label RCT	Single university hospital	None (open-label; but blinded CGM device for control comparisons)	Web-based randomisation (REDCap) stratified by BMI, ethnicity, prev GDM, family history	Yes — encrypted schedule maintained in secure database	Yes — ITT for primary outcome	Minimal missing data; HbA1c missing in 66%; primary outcome >99% complete	Composite adverse outcome: 36% rtCGM vs 35% SMBG (OR 1.06, 95% CI 0.66–1.71, p=0.80); no differences in LGA (10% vs 10%), macrosomia (6% vs 3%), neonatal hypoglycaemia (6% vs 6%); time in range slightly higher in SMBG at late gestation (96.9% vs 92.2%, p=0.02)	26	70.3	Some concerns
38	2024	CTRI/2022/04/041877	India	PCOS	Upper-middle-income	No external funding reported	168	Parallel multi-arm RCT	Single tertiary teaching hospital (SRM Medical College Hospital)	Open-label; assessors not blinded	Computer-generated open random number list	None (open-label, no concealment)	No — per-protocol only	No imputation; complete-case analysis (4 dropouts)	All groups: ↓LH, ↓LH:FSH, ↓TT, ↓HOMA-IR (all p<0.0001). Acarbose+MI: ↓FI (p=0.0022), ↓TGL (p=0.0076), ↓LDL (p=0.0002). Acarbose+Metformin: ↑SHBG (p=0.0013). Metformin alone: ↑HDL (p<0.0001), ↓TC (p=0.0438).	28	75.7	High risk
39	2015	Not registered	India	PCOS	Lower-middle-income	None stated	100	Randomized controlled trial	Tertiary hospital (Acharya Vinoba Bhave Rural Hospital)	Not blinded (open-label)	Computer-generated random number table	Sealed opaque envelopes; consecutively numbered	No ITT; per-protocol (completers only)	No imputation	Menstrual regularity: 28.6%→60% MI; 50%→74% MET (p=0.002). HOMA-IR: MI 4.21→3.63 (p=0.001) vs MET nonsignificant; between-group p=0.004. Fasting insulin: MI ↓ significantly; MET NS. Androgens (testosterone): significant decrease in both groups. Ultrasound: AFC and ovarian volume improved in both (p<0.001). Conception: MI 36.8%, MET 33.3% (NS).	17	45.9	High risk
40	2013	ClinicalTrials.gov NCT01047982	Italy	GDM	High-income	Not reported (institutional funding, University of Messina)	220	Prospective, open-label, randomized placebo-controlled trial	Single-centre (University of Messina, Department of Obstetrics and Gynecology)	Open-label (participants and clinicians unblinded)	Computer-generated randomization (1:1 allocation)	Yes – independent allocation	Yes – ITT and per-protocol analyses consistent	Complete-case analysis; dropout reasons reported (no adverse reactions)	↓ GDM: 6.0% vs 15.3% (p=0.04), OR 0.35 (95% CI 0.13–0.96); ↓ fasting glucose (77 vs 81 mg/dL, p=0.001), ↓ 1-h OGTT glucose (123 vs 133 mg/dL, p=0.02); ↓ birth weight (3111 ± 447 g vs 3273 ± 504 g, p=0.018); ↓ macrosomia (0% vs 7%, p=0.007); no diff. in hypertension, preterm birth, or neonatal outcomes	21	56.8	Some concerns
41	2025	CTRI/2022/07/043832	India	GDM	Lower-middle-income	No external funding reported	120	Parallel-group RCT	Single centre (Kasturba Hospital, Manipal)	Not blinded	Computer-generated block randomisation (12 blocks of 10)	Sequentially numbered, opaque sealed envelopes	No — completer analysis only	Complete-case only	HOMA-IR: ↓ from 2.36→2.10 vs ↑2.41→2.84 (F=44.62, p<0.001). FBG: ↓10.25 mg/dL vs 0.55 mg/dL (F=25.2, p<0.001). PPBG: ↓19 mg/dL vs ↓2 mg/dL (F=6.98, p=0.009). PA increased 454→916 MET-min vs decrease 431→387 (F=377, p<0.001).	24	64.9	Some concerns
42	2022	IRCT2014110515536N2	Iran	PCOS	Upper-middle-income	Tehran University of Medical Sciences	99	Double-blind RCT	Single referral gynecology/obstetrics hospital	Participants, researchers, lab staff blinded	Computer-generated random numbers; permuted blocks of 6	Opaque sealed numbered envelopes	No explicit ITT; per-protocol final N=88	Complete-case; no imputation	Significant ↑ in SHBG (P=0.030); no significant changes in other hormones or clinical signs	23	62.2	Some concerns
43	2009	not reported	Brazil	PCOS	Upper-middle-income	not reported	13	Randomized Controlled Trial (randomization of oocytes to culture media) Single-centre, laboratory-based RCT	Single fertility/IVM laboratory	not specified	Random allocation of oocytes to either medium (Exact method not described in excerpt)	not reported	not reported	not reported	TCM-199: Maturation: 81.9% Fertilization: 70% Better embryo quality HTF: Lower maturation and fertilization Lower rate of good-quality embryos Cleavage rates: No difference between groups Pregnancy outcomes: 1 biochemical pregnancy 1 ectopic pregnancy Mixed embryo transfers → cannot attribute outcome to either culture medium.	9	24.3	High risk
44	2017	ANZCTR 12612000122853	Australia	PCOS	High-income	Western Sydney University; Australian Postgraduate Award; MediHerb (unconditional tablet provision)	122	Pragmatic parallel-group randomized controlled trial	Community-based (homes, gyms, clinics)	Participants unblinded; analysts blinded	Computer-generated block randomisation (blocks of 50) stratified by BMI; external service	Yes – real-time SMS allocation from independent provider	Yes – ITT stated and applied	LOCF used for missing endpoint data	Primary outcome (cycle length): −42.9 days vs control (95% CI 21.1–64.8), p<0.01, ηp²=0.11. Normal cycles (20–34 d): 55.0% vs 24.2%, RR 1.9 (95% CI 1.32–2.69), p<0.01. BMI: −1.0 kg/m² (95% CI 0.5–1.6), p<0.01. Weight: −2.95 kg (95% CI 1.5–4.4), p<0.01. Fasting insulin: −5.9 mU/L (95% CI 1.0–10.9), p=0.02. LH: −1.82 IU/L (95% CI 0.1–3.5), p=0.04. QoL (PCOSQ total): +31.1 (95% CI 20.7–41.4), p<0.01…	28	75.7	High risk
45	2009	Not registered (pre-2010)	USA	PCOS	High-income	American Diabetes Association; Veterans Affairs Medical Research Service; Takeda Pharmaceuticals; NIH (GCRC grant)	28	Randomized, placebo-controlled clinical trial	Academic metabolic/endocrine research centers (VA San Diego + UCSD GCRC)	Single-blind (assessors blinded)	Randomized 1:1; method not explicitly described	Pills identical in appearance; data analyst blinded; allocation concealment not detailed	No — per-protocol (23 completers analyzed)	Dropouts excluded; no imputation	Insulin sensitivity: GDR ↑31% (p<0.01). Adiponectin doubled (p<0.0001). Fasting insulin ↓ (p<0.01). 2-hr glucose ↓ (p=0.01). AUCg ↓22% vs placebo (p<0.0001). Hyperandrogenism: stimulated 17-OHP response ↓ significantly (p=0.02); FG score improved (16→11; p=0.0015). Weight gain: +~5 kg (p<0.05).	15	40.5	Some concerns
46	2023	NCT03979183	Spain	Endometriosis	High-income	Health Institute Carlos III (FEDER funds PI17/01743); University of Granada research funds	31	Parallel-group RCT	Two public university hospitals	Assessor, statistician, and data manager blinded; participants/therapists unblinded	Computer-generated random sequence	Sequential opaque envelopes opened by investigator	No	Complete-case analysis; no imputation	QoL significantly improved at 9 weeks & 1 year (large effect sizes d>0.8); reduced dyspareunia; increased distal & pelvic PPT; improved trunk strength & lumbopelvic stability; no major harms	27	73	Some concerns
47	2013	Not reported	Italy	PCOS	High-income	Not reported (authors declare no conflict of interest)	50	Randomized controlled clinical study (single-centre)	University IVF centre (University of Pisa; ART clinic)	Not described as blinded (open-label)	Computer-generated randomization list prepared by author	Sealed, numbered envelopes held by nurse coordinator (envelope allocation)	No explicit ITT reported; analyses presented on treated/available patients (per-protocol emphasis)	Cancelled cycles (OHSS risk) and pregnancy during treatment reported and excluded from some analyses; 5 cancellations before pick-up; handled by excluding cancelled cycles from those specific outcome analyses	MYO group: significant reductions in LH, PRL, insulin, LH/FSH ratio, HOMA and increased glucose/insulin ratio vs control (all p≤0.05–0.005). Ovarian stimulation: shorter stimulation (11.5 vs 12.6 days, p=0.002), fewer FSH units, lower E2 on hCG day. Fewer oocytes retrieved in MYO (6.5 vs 10.8, p=0.04) but higher % top-quality oocytes (82% vs 65%, p=0.05). Pregnancy rates: b-hCG positive 60% vs 32…	21	56.8	Some concerns
48	2014	Not reported	Iran	PCOS	Upper-middle-income	Vice-chancellor for research, Kashan University of Medical Sciences (grant 9213)	54	Randomized controlled clinical trial	Gynecology clinics of Kashan University Medical Sciences	Single-blind (all staff & participants except dietitian blinded)	Computer-generated random numbers	Not specified; no mention of sealed envelopes	Yes (explicit ITT)	Last-observation-carried-forward	Significant ↓ weight (–4.4 vs –1.5 kg); ↓ BMI; ↓ TG (–10 vs +19 mg/dL); ↓ VLDL-C; ↑ TAC (+98 vs –175); ↑ GSH (+66 vs –155); ↓ insulin	25	67.6	Some concerns
49	2019	IRCT2017091225949N5	Iran	GDM	Upper-middle-income	Research Council of Arak University of Medical Sciences (Grant 2846)	60	Randomized double-blind placebo-controlled clinical trial	Single-centre (Arak University of Medical Sciences)	Double-blind (participants and statistician)	Simple randomization	Not explicitly reported	Not reported	Not reported	Means ± SEM, p-values; significant changes in adiponectin, A/L, L/A, MDA/TAC, HOMA-IR	23	62.2	Some concerns
50	2017	ISRCTN84389045	Spain	GDM	High-income	Fundación para Estudios Endocrinometabólicos; Instituto de Salud Carlos III (PI14/01563); FEDER Funds	1000	Parallel, two-arm, open-label, randomised controlled trial	Single-centre (Hospital Clínico San Carlos, Madrid)	Open-label (participants and clinicians aware; analysts blinded)	Stratified block randomisation (by age, BMI, parity, ethnicity; blocks of 4–6)	Yes – centralised, blinded statistician	Yes (intention-to-treat analysis)	Complete-case analysis; no imputation described	GDM: 17.1% (intervention) vs 23.4% (control); RR 0.73 (95% CI 0.56–0.95, p=0.020); lower insulin use (19% vs 32%, p=0.002); ↓ prematurity (1.2% vs 3.8%), ↓ SGA (1.2% vs 5.7%), ↓ LGA (0.9% vs 4.1%), ↓ perineal trauma (3.2% vs 10.9%), ↓ emergency C-section (2% vs 7%)	31	83.8	Some concerns
51	2006	NR	Turkey	PCOS	Upper-middle-income	NR	106	Parallel-group randomized controlled trial (described as a “prospective, randomized study” comparing two groups: CC vs letrozole, with outcomes assessed after one stimulation cycle)	NR	NR	NR	NR	NR	NR	After one cycle: letrozole group had fewer mature follicles (reported as 2.4 ± 1.15 vs 1.2 ± 0.41 follicles ≥18 mm, p=0.0001), greater endometrial thickness (reported as 52 ± 1.2 vs 84 ± 1.8 mm, p=0.0001) – likely OCR for 5.2 vs 8.4 mm but decimals not visible in extracted text; higher ovulation rate (63.6% vs 82.4%, p=0.016) and higher pregnancy rate (9.1% vs 21.6%, p=0.037) in letrozole vs CC. …	10	27	High risk
52	2013	NR	Saudi Arabia	PCOS	High-income	NR	42	Randomized controlled trial, parallel-group, open-label.	Single centre	NR	Sequentially numbered opaque sealed envelopes containing treatment allocation cards.	Yes — opaque envelope method used.	NR	NR	Menstrual regularity: 71.4% vs 38.1% (p=0.03). Ovulation rate: 76.2% vs 38.1% (p=0.021). Conception (urine test): 66.6% vs 28.6% (p=0.01). Clinical pregnancy (ultrasound): 61.9% vs 28.6% (p=0.03). All favor metformin + CC.	14	37.8	High risk
53	2009	Not registered	Tunisia	PCOS	Lower-middle-income	Not reported	32	Prospective randomized controlled trial	Single-centre public university hospital (CHU Hedi Chaker–Sfax)	Open-label (no blinding)	Randomly allocated to groups; method not clearly described	Not reported	No (per-protocol only)	None described; no imputation	Ovulation: 62.5% metformin vs 37.5% placebo (RR 1.66), NS due to small sample; higher E2 and mature follicles in metformin group	13	35.1	High risk
54	2017	IRCT2014121610826N16	Iran	PCOS	Upper-middle-income	Shahid Sadoughi University of Medical Sciences	60	Parallel RCT (12-week intervention)	Single gynecology outpatient clinic	Single-blind (participants “unaware of their diets”)	Block randomisation; computer-generated	Not explicitly stated (participants unaware of diet assignment suggests partial concealment)	No ITT mentioned	5 dropouts excluded; complete-case analysis	Greater reductions in weight (−5.78 vs −4.34 kg, P=0.032), BMI (−2.29 vs −1.69 kg/m², P=0.02), fat mass (−3.23 vs −2.13 kg, P=0.008); androstenedione reduced more (P<0.05); SHBG ↑; TAC ↑	22	59.5	Some concerns
55	2022	IRCT20160524028038N8	Iran	PCOS	Upper-middle-income	Research Deputy of Hormozgan University of Medical Sciences	40	Double-blind RCT	Single infertility centre (Hormozgan University of Medical Sciences)	Double-blind (participants + physicians)	Block randomisation via statistical software	Sequentially sealed opaque envelopes	No (per-protocol analysis)	No missing data reported; all 40 analysed	Chemical pregnancy: 10% vs 0% (p=0.05); clinical pregnancy: 10% vs 0% (p=0.05). FSFI domains all significantly improved (p<0.05). Body image score improved: 30 vs 40 (p<0.01). LH/FSH decreased significantly in probiotic group. No metabolic changes significant.	20	54.1	Some concerns
56	2021	not stated	Europe	PMDD	High-income	Asarina Pharma, Copenhagen, Denmark	206	parallel double-blind, randomized controlled trial	Multicenter	Double-blind	not reported	not reported	Yes (ITT population reported)	not specified	Significant improvement in distress and impairment for 10 mg; LmaxSum21 decreased but not significant; 16 mg less effective; responder analysis positive for 10 mg	29	78.4	Some concerns
57	2024	IRCT201706110334452N13	Iran	PCOS	Upper-middle-income	Kerman University of Medical Sciences (grant 99001157) & Shiraz University of Medical Sciences	19	Pilot randomized clinical trial (two-arm)	Health centres affiliated with Shiraz University of Medical Sciences	Participants and researchers unblinded; outcomes assessor & statistician blinded	Random Allocation Software v1; permutation block randomisation	Dark-coloured sealed envelopes used for allocation concealment	Not reported as ITT; per-protocol analysis only	Not described; no imputation reported	MBCT improved overall FertiQOL more than cupping (post-intervention MD=11.11; p=0.091; adjusted p=0.030). Core FertiQOL improved significantly (adjusted p=0.012). No difference in conception (1 pregnancy per group).	16	43.2	High risk
58	2025	IRCT20200122046228N5 (retrospectively registered 2024)	Iran	GDM	Upper-middle-income	Babol University of Medical Sciences (Grant 724134351)	75	Parallel RCT	Single-centre (Shohada Hospital, Behshahr)	Assessor-blinded; participants unblinded	Block randomisation via Sealedenvelope.com	Concealed in opaque sealed envelopes	Yes (stated ITT)	ITT applied; minimal missing data; ANCOVA adjusted for baseline, age, BMI	FBS: 91.2 vs 109.5 mg/dL (p<0.001); HbA1c: 4.98 vs 5.26% (p=0.078); SDSCA: 4.06 vs 2.55 (p<0.001); NuPDQ-17: 15.3 vs 27.0 (p<0.001); DASS: Depression ↓ (p<0.001), Anxiety ↓ (p<0.001), Stress ↓ (p<0.001)	26	70.3	Some concerns
59	2019	IRCT2016030126860N1	Iran	PCOS	Upper-middle-income	Tehran University of Medical Sciences (Grant 94-02-30-29469)	62	Triple-blind RCT	University fertility centers (Omid IVF Centre + Tehran University)	Triple-blind	Blocked randomization	Capsules identical in shape; investigator, participants, and analysts blinded	No — per-protocol (1 excluded for missing data)	Missing data excluded; no imputation	VEGF↓ (2.63 vs 6.46 RQ, p=0.0001); HIF1↓ (1.98 vs 4.61 RQ, p=0.0001). Testosterone↓, LH↓, FSH↑, TSH↑ (all p<0.05). High-quality oocyte rate↑ (81.9% vs 69.1%, p=0.002). High-quality embryo rate↑ (89.8% vs 78.8%, p=0.024). Fertilization rate NS. Pregnancy: chemical 43.3% vs 22.6% (p=0.073); clinical 36.7% vs 19.4% (p=0.111) (Table 5–6, Figs 7–8)	25	67.6	Some concerns
60	2012	Not registered	India	GDM	Lower-middle-income	Not reported	323	Parallel, open-label RCT	Single-centre (Diabetes Care & Research Institute, Chennai)	Open-label	Sealed random allocation slips (1:1)	Yes – sealed envelopes opened sequentially	No (complete-case)	3 lost to follow-up; complete-case analysis	Macrosomia: 6.3% vs 6.9% (NS). Final insulin dose: 19.8U vs 26.3U (p=0.006). No differences in FPG, PPG, HbA1c, maternal weight gain, hypoglycemia, cesarean rate, neonatal weight, Apgar scores	18	48.6	Some concerns
61	2009	NCT00396513	Poland & USA (collaboration)	PCOS	High-income	Polish State Committee for Scientific Research (KBN); NICHD	136	3-arm parallel RCT	Academic medical center	Open-label (pills identifiable)	Random number tables; blocks of random size (6, 9, 12)	Sequentially numbered sealed envelopes	No—analysis according to actual treatment received (per protocol)	Dropouts excluded; no imputation	Total testosterone ↓ 13.6–16.3% in all arms; simvastatin & SM ↓ LDL 32–40%, ↓ TC 20–24%; simvastatin improved insulin sensitivity (+14%); hs-CRP ↓ 34–52%; sVCAM ↓ 4–8%; hirsutism minimally ↓ (NS)	22	59.5	High risk
62	2011	NCT00396513	Poland & USA	PCOS	High-income	Polish State Committee for Scientific Research; NICHD	139	Three-arm RCT	University medical centers	Open-label (pills identifiable); outcome assessors not blinded	1:1:1 allocation; random blocks (6/9/12); random number tables	Sequentially numbered, sealed envelopes	Per-protocol only	Dropouts reported; no imputation	Total testosterone ↓25.6% (S & M), ↓20.1% (SM). Ovarian volume ↓14% (S), ↓5% (M), ↓7% (SM). Menstrual cycles ↑71% (S), ↑33% (M), ↑73% (SM). LDL ↓31% (S), ↓32% (SM), NS in M. hs-CRP ↓33–55% in all groups.	23	62.2	High risk
63	2021	CTRI/2018/04/013343	India	PCOS	Lower-middle-income	None reported	90	Parallel RCT	Single tertiary teaching hospital (AIIMS Jodhpur)	Assessor-blinded (ultrasound & statistician); participants/providers unblinded	Block randomization (block size 10; 1:1), computer-generated	Yes – sequentially numbered, opaque, sealed envelopes	Yes – ITT reported and used	Participants lost to follow-up assumed non-ovulatory/non-pregnant; PP excludes withdrawals	Pregnancy 42.2% vs 20% (P=0.04); monofollicular 68.4% vs 44.8% (P<0.000); ovulation ~86% both groups; time-to-pregnancy faster with letrozole (9.65 vs 11.07 weeks; log-rank P=0.042); ET not significantly different	26	70.3	Some concerns
64	2010	Not reported	Brazil	GDM	Upper-middle-income	CAPES (Brazilian postgraduate fellowship)	64	Randomized controlled trial	Single-centre (University Hospital, University of São Paulo)	Clinicians blinded (obstetricians unaware of group); participants not blinded	Computer-generated random sequence	Sealed opaque envelopes	Yes (explicit ITT)	No imputation; complete-case	Insulin use: 7/32 vs 18/32 (p=.005); mean glucose 100.3±9.4 vs 102.9±7.9; weeks within target: 0.63±0.30 vs 0.41±0.31 (p=.006)	20	54.1	Some concerns
65	2018	Not registered	Malaysia	GDM	Upper-middle-income	No external funding declared	520	Randomised controlled trial	Single-centre (Universiti Kebangsaan Malaysia Medical Centre, Kuala Lumpur)	Open-label	Computer-generated random allocation to WHO or IADPSG diagnostic arm	Yes – allocation managed by independent staff	Not stated	Complete-case; no imputation required	GDM prevalence WHO 37.9% vs IADPSG 38.6%; WHO group ↑ gestational hypertension/pre-eclampsia (11.3% vs 4.2%, p=0.004), ↑ neonatal hypoglycaemia (4.1% vs 1%, p=0.042); IADPSG ↑ macrosomia (6.3% vs 1%, p=0.027), ↑ C-section (35.4% vs 26.8%, p=0.012); sensitivity 66%, specificity 88%	18	48.6	Some concerns
66	2021	NCT03467503	USA	GDM	High-income	NIH NIGMS GM103440; UNLV Dean’s Faculty Development Award	34	Randomized controlled trial	Single centre (UNLV prenatal clinic)	Not fully blinded (participants aware); analysts blinded	SAS-generated random sequence	Not reported	Not explicitly stated	Multiple imputation for weight data	Intervention reduced weight gain, CRP, and GCT glucose; no significant GDM incidence difference	21	56.8	Some concerns
67	2012	PFU-IRB #405/2004	Brazil	PCOS	Upper-middle-income	Federal University of São Paulo; Federal University of Paraíba; CAPES	60	Randomized placebo-controlled pilot trial	University gynecology outpatient clinics	Double-blind (capsules labeled ZX/XZ)	Random assignment to rosiglitazone or placebo	Not explicitly described	No – per-protocol only	Non-completers excluded (poor adherence, pregnancy)	IGF-1: 196.1 ± 68.3 → 176.9 ± 53.3 ng/mL (p = 0.028 vs placebo). IGFBP-3: 4.86 ± 0.82 → 5.34 ± 0.70 ng/mL (p = 0.041 vs placebo). Free testosterone: 2.47 ± 0.99 → 1.37 ± 0.57 ng/dL (p = 0.006). Androstenedione: 3.11 ± 1.18 → 2.15 ± 0.68 ng/mL (p = 0.002). 2-h insulin: 112.98 ± 88.74 → 64.04 ± 64.23 mIU/mL (p = 0.001). G2h/I2h ratio: 1.37 ± 0.58 → 2.30 ± 1.21 (p = 0.002). HOMA-IR: 2.96 ± 1.81 → 2.…	14	37.8	High risk
68	2010	not reported	Italy and Spain	PCOS	High-income	not reported	40	Prospective, randomized, pilot trial	Multicentre (Bologna, Modena-Reggio Emilia, Barcelona)	Clinical examiners were blinded; participants not blinded → single-blind	Sequentially numbered sealed envelopes; random number table; 1:1 allocation	Sealed opaque envelopes (adequate)	Not performed	Excluded dropouts; no imputation	Significant ↓ in androgen levels in both groups (greater with Yasmin) • Significant ↓ LH/FSH ratio • Ultrasound: ↓ ovarian volume, ↓ follicles • Both groups ↑ triglycerides, ↑ cholesterol, ↑ BP • NuvaRing improved AUC glucose/insulin/C-peptide • Yasmin worsened insulin resistance (↑ HOMA-IR, ↑ insulinogenic index)	19	51.4	High risk
69	2010	Not reported	Italy	PCOS	High-income	None (no external funding)	28	Prospective randomized placebo-controlled pilot trial	University hospital (Dept. of Gynecology, Univ. of Bologna)	Double-blind (patients + examiners)	Random-number table; sequentially numbered sealed envelopes (provided by manufacturer)	Sealed envelopes, identical placebo	No ITT; completer analysis	4 dropouts excluded (1 headache; 3 nausea/diarrhea); no imputation	EE/DRSP alone (Group I): ↑24-h SBP/DBP (p<0.01), ↑day/night BP, ↑% SBP>120 mmHg (sleep), ↑ophthalmic artery back-pressure (p=0.017). L-arginine group (II): Significant ↑NO₂/NO₃ (20.7→42.4 µmol/L, p=0.001); improved brachial FMD at 15s; ↓ophthalmic PI (p=0.018); stable BP. Both groups: ↓androstenedione; ↓T; ↑SHBG; ↓subcapsular follicles; ↓ovarian volume.	18	48.6	Some concerns
70	2006	Not registered	Turkey	PCOS	Upper-middle-income	Not reported	80	Prospective randomized controlled trial	University hospital infertility clinic	Double-blind	Simple computer randomization	Central consultation for allocation	No ITT; per-protocol	6 dropouts excluded; no imputation	Ovulation: 65.7% vs 74.7% (p=0.17). Pregnancy: 9.1% vs 7.4% (NS). Follicles ≥15 mm: fewer with letrozole (p=0.015). E2: significantly lower with letrozole (189 vs 386 pg/mL; p=0.001). E2 per follicle: lower with letrozole (p=0.001). Endometrium: median 8 mm both; thin endometrium (<5 mm) more frequent with letrozole (6.1%, p=0.03). No multifetal pregnancies.	20	54.1	Some concerns
71	2009	not reported	Bangladesh	PCOS	Lower-middle-income	not reported	64	Prospective, randomized, not blinded, controlled trial	Single-centre, tertiary infertility care unit	Not blinded (open-label)	Lottery method	not reported	not reported	No missing data reported	Ovulation: 62.5% (letrozole) vs 37.5% (CC), P<0.05 Pregnancy rate: 40.63% vs 18.75%, not statistically significant Mean follicular diameter on day 16: 18.84 ± 3.17 mm vs 16.19 ± 3.47 mm, P<0.001 Mean E2 on hCG day: 444.03 ± 85.42 pg/mL vs 817.75 ± 286.70 pg/mL, P<0.001 Endometrial thickness: 10.37 ± 1.2 mm vs 9.03 ± 0.89 mm, P<0.001 Serum P4 day 21: 19.09 ± 10.47 ng/mL vs 13.90 ± 12 ng/mL, P<0.05…	15	40.5	High risk
72	2019	IRCT2013080514277N1	Iran	PCOS	Upper-middle-income	None reported	64	Parallel randomized controlled trial (non-inferiority)	Single academic endocrine center	Open-label	Computer-generated randomization table (1:1)	Not concealed; treatment allocation not blinded	Yes – ITT stated	Baseline values carried forward for dropouts	HOMA-IR: phlebotomy 3.5→2.7 (Δ −0.73, p=0.047); OCs 3.1→2.8 (Δ −0.45, p=0.032); between-group p=0.516. FAI: phlebotomy Δ −1.1 (p=0.042); OCs Δ −1.2 (p=0.001); between-group p=0.061. FG score: phlebotomy 16.8→13.3 (p=0.028); OCs 14.3→9.8 (p=0.001); between-group p=0.235. Menstrual regularity: 100% OCs vs 55.6% phlebotomy (p=0.001). Triglycerides: OCs +37.7 mg/dL vs phlebotomy +8.3 mg/dL; between-g…	24	64.9	High risk
73	2018	NCT01321840	Germany	Endometriosis	High-income	Horst Görtz Foundation; Schweizer-Arau Foundation; Theophrastus Foundation	67	Randomised controlled trial (waitlist-controlled)	Single-centre (Munich, Germany)	Unblinded	Randomised allocation; method not fully detailed beyond parallel assignment	Not described	Not explicitly stated	Missing data due to attrition (60/67 at 3 months; 40/67 at 6 months); no imputation described	Significant improvements in pain, anxiety, depression; altered hippocampal connectivity; early treatment improved symptoms vs waitlist (p<.05)	17	45.9	High risk
74	2021	NCT03362918	Canada	PCOS	High-income	Cumming School of Medicine Clinical Research Fund; Libin Cardiovascular Institute Grant	47	Pilot randomized controlled trial	Single-centre	Assessors & lab personnel blinded; participants unblinded	Central web-based randomisation (REDCap); variable block size; stratified by BMI	Yes — concealed prior to allocation	ITT for reproductive outcomes; PP sensitivity analyses	Complete-case + mixed models; no imputation	CAET reduced BMI −0.8 kg/m² (p<.01); WC decreased in all groups (−4.5 to −7.3 cm); HIIT increased HDL-C +0.18 mmol/L (p=.04) vs control; LDL-C lower in HIIT vs CAET (p=.03); ovulation analyses limited by adherence	16	43.2	Some concerns
75	2005	NR	Sweden	Endometriosis	High-income	Financial support from World Class Stockholm and AstraZeneca.	19	Randomized controlled pilot trial, two parallel arms (training vs control).	multicentre	NR	NR	NR	NR	Missing values assumed missing at random; handled via mixed-model approach; no imputation.	Femoral neck BMD: At 12 months, training group −0.6% vs control −3.6% from baseline; between-group difference significant (p = 0.029). Lumbar spine BMD: Both groups lost BMD during GnRH therapy; no significant between-group difference at 12 months.	19	51.4	High risk
76	2015	ACTRN12614000942651	Ghana	GDM	Lower-middle-income	None reported	104	Randomized controlled trial (open-label)	Single tertiary teaching hospital (Korle Bu)	Open-label	Ballot method (paper draw from opaque envelope)	Opaque envelopes, but sequence not concealed beyond draw	Yes (stated ITT design)	Complete-case; dropouts reported	2-hr PP glucose significantly lower in metformin group (7.84 vs 9.05 mmol/L; p=0.004); FBG and 1-hr PP similar; both groups improved from baseline	21	56.8	Some concerns
77	2012	CTRI/2010/091/000332	India	PCOS	Lower-middle-income	Not reported	171	Double-blind randomized controlled trial (three-arm)	Single gynecologic clinic (private hospital)	Double-blind (participants and investigators)	Computer-generated randomization table (1:1:1)	Yes – sequentially numbered identical opaque containers	Yes – explicitly stated	Last observation carried forward (LOCF)	At 12 months, cyproterone acetate showed greater reduction in mFG score (−5.29) and FAI (−10.57) and greater SHBG increase vs desogestrel (P<0.01); no metabolic differences between groups	27	73	Some concerns
78	2009	Not reported	Turkey	PCOS	Upper-middle-income	Not reported	40	Randomized controlled trial (parallel)	Single-centre tertiary training & research hospitals	Open-label	Randomly divided into two groups (method not detailed)	Not described	Not stated	Complete-case analysis; no imputation reported	EE/CA + metformin significantly reduced sVCAM-1 (1445→1167 ng/mL, p<0.05) and sICAM-1 (442→345 ng/mL, p<0.05); no significant changes with EE/CA alone	20	54.1	High risk
79	2009	Pre-registered clinical protocol (Lancet 364:911–912); registration number not stated	Greece	PCOS	High-income	Not reported	64	Prospective randomized placebo-controlled trial	University hospital endocrine & gynecology departments	Double-blind (metformin vs placebo)	Random allocation to metformin or placebo (1:1 within PCOS and control strata)	Not explicitly reported	Not explicitly stated	Complete-case analysis; 6 withdrawals excluded	Basal LH (PCOS): 8.8±4.6 → 8.0±3.5 IU/L on MET (p<0.05). AURC-LH (PCOS): 1322±385 → 1012±297 IU/L/600 (p<0.05); no change with placebo. Ovulation rate: 60.0% MET vs 26.5% placebo. Cycle length: 71.2±35.3 → 35.9±9.0 days on MET (p<0.01). QUICKY index (PCOS): 0.32±0.03 → 0.36±0.03 (p<0.05). Ovulatory vs anovulatory PCOS on MET: basal LH 6.4±1.2 vs 9.1±2.0 IU/L (p<0.05); AURC-PRL 940±195 vs 1482±266…	16	43.2	Some concerns
80	2017	NCT01875718; EudraCT 2012-004081-18	Sweden	PMDD	High-income	Asarina Pharma AB (industry-funded)	126	Randomized, double-blind, placebo-controlled, parallel-group Phase I/II RCT	10 Swedish centers (university, tertiary, secondary, private clinics)	Double-blind with unblinded injectors	Independent statistician; Excel-generated random numbers; block randomization per center	Drug appearance differed; unblinded injector; participants & main study staff remained blinded via multi-layer packing	No (PP only)	Missing DRSP values replaced by linear interpolation	PP: UC1010 superior to placebo (Total DRSP p=0.041). Pure PMDD treated correctly: large effects—75% reduction vs 47% placebo; effect size d=0.7	28	75.7	Some concerns
81	2014	ClinicalTrials.gov NCT01506310	Italy	GDM	High-income	Regione Piemonte (Italy) Grant 2009	200	2×2 factorial randomized controlled trial	Single-centre (Sant’Anna Hospital, University of Turin)	Blinded outcome assessors, dieticians, and obstetricians; participants unblinded	Computer-based randomization via epiclin.it (stratified by BMI and METs)	Yes – website-based concealed randomisation	Yes – complete data for all participants	All 200 completed; no missing data reported	Exercise reduced postprandial glucose (−11.1 mg/dL, p<0.001), HbA1c (−0.3%, p<0.001), triglycerides (p=0.02), CRP (p<0.001); OR 0.50 (95% CI 0.28–0.89, p=0.02) for any maternal/neonatal complication; fasting glucose unchanged	30	81.1	Some concerns
82	2018	Not registered	Turkey	PCOS	Upper-middle-income	Gulhane Military Medical Academy (study originally a thesis project)	87	Randomized, prospective, controlled, 4-arm parallel-group clinical trial	Multicentre across ≥3 hospitals in Turkey (Ankara, Istanbul, Afyon)	None stated → appears open-label	Computerized randomization (Fig. 1)	Not specified; likely central assignment but concealment not described	No ITT; analysis only among completers	No imputation; complete-case analysis	OC group: ↑ hsCRP +102%, ↑ ApoB +20.9%, ↑ PAI-1 +34%, ↓ adiponectin −28% (all p<0.05). Metformin group: ↓ hsCRP, ApoB, PAI-1 (all p<0.05); ↑ adiponectin +35%; ↓ HOMA-IR (p=0.003). Combination: ↑ PAI-1 +33%; ↑ HOMA-IR +117% (p=0.006). Control: no significant changes.	21	56.8	High risk
83	2019	NCT02588729	Norway	GDM	High-income	Norwegian Research Council (ID 228517)	238	Parallel, non-blinded RCT	Multicentre (5 diabetes outpatient clinics, Oslo)	Non-blinded participants/clinicians; lab staff & statistician blinded	Computer-based block randomisation (blocks of 4)	Yes – automated allocation; concealed until assignment	Yes – ITT	No imputation; missing postpartum OGTT (33%)	Primary outcome: No effect on postpartum OGTT (6.7 vs 6.0 mmol/L, p=0.22). Emergency CS lower in intervention (8.8% vs 22.1%) but disappeared after parity adjustment; no differences in NICU transfers, birth weight, breastfeeding	28	75.7	Some concerns
84	2023	EudraCT 2020-000228-20; NCT04593459	Austria	PCOS	High-income	Austrian Federal Government (COMET K1 Centre); Land Steiermark; Land Wien; Institut AllergoSan; Winclove Probiotics	180	Phase IV RCT	Single-centre	Double-blind for probiotic vs placebo; open-label for metformin	Web-based Randomizer system for open-label allocation; sponsor-independent randomisation list for blinded arms	Stratified, allocation via coded sachets; concealed by manufacturer	Yes – intention-to-treat specified for primary analysis	Deviations documented; ITT includes all randomized; per-protocol sensitivity	Protocol study only (no results yet)	27	73	Low risk
85	2018	IRCT201508173664N14	Iran	PCOS	Upper-middle-income	Research Vice-Chancellor, Tabriz University of Medical Sciences	84	Randomized double-blind placebo-controlled clinical trial	Single center (Mohheb Yas Hospital, Tehran)	Double-blind (participants & investigators)	Block randomization (block size 2), stratified by age & BMI	Identical capsules used; allocation concealed (details not extensively reported)	No — per-protocol only	No missing data; all participants completed	Significant improvements with cinnamon vs placebo: ↓ glucose (−11.8 mg/dL, p<0.001), ↓ insulin (−3.34 μIU/mL, p<0.001), ↓ HOMA-IR (−1.17, p<0.001), ↓ TC (−10.6 mg/dL, p=0.046), ↓ LDL-C (p=0.04), ↑ HDL-C (p<0.001); no change in adiponectin (p=0.28)	26	70.3	Low risk
86	2024	NCT05768724	Turkey	PCOS	Upper-middle-income	No specific external funding reported	68	Randomized, single-blind, two-arm, parallel RCT	Pediatric endocrinology outpatient clinic, university hospital	Single-blind: assessors (endocrinologist, radiologist, lab staff) blinded; participants unblinded	Statistician-generated randomization; opaque sealed envelopes (page 2–3)	Sealed opaque envelopes held until study completion	No ITT—only completers analyzed	No imputation; complete-case analysis of 40 adolescents	Greater reductions in androgen markers in RESMENA group: ↓Free T (p<0.001), ↓Androstenedione (p<0.001), ↓LH (p=0.001), ↓LH/FSH (p<0.001), ↑SHBG (p=0.048). Greater ↓HOMA-IR and ↑QUICKI (p-values 0.001–0.042). Weight loss: Control −7.3 kg vs RESMENA −11.4 kg.	22	59.5	High risk
87	2018	ISRCTN70595832	Nine European countries	GDM	High-income	European FP7 (major), plus national funding (NL, PL, DK, UK, ES)	435	Factorial parallel RCT	Multicentre (11 centres in 9 countries)	Unblinded participants & coaches; outcome assessors not blinded	Computer-generated, pre-stratified by centre	Yes – sealed opaque envelopes	Yes (full ITT with MI)	Multiple imputation (20 datasets)	HE+PA reduced GWG by −2.3 kg (95% CI −3.7 to −0.9); No effect on glucose or HOMA-IR; HE+PA cost-saving for QALYs (ICER −€91,254)	29	78.4	Some concerns
88	2009	Not registered (pre–trial registry era)	USA	PCOS	High-income	NIH grants K23HL04390-01 and MO1-RR-30	37	Randomized controlled trial	Single centre (Duke University Medical Center)	None – open-label (exercise vs. no lifestyle change)	Computer-generated randomization; sequence placed in sequentially numbered envelopes	Yes – sealed, sequentially numbered envelopes prepared by independent staff	No — ITT not performed (high dropout; missing end-of-study testing)	Complete case analysis only (participants without end-of-study data excluded)	Significant reductions in large VLDL (p=0.007), triglycerides (p=0.003), VLDL-TG (p=0.003), medium/small HDL (p=0.031); increases in large HDL (p=0.002) and HDL size (p=0.001); trends toward improved insulin AUC (p=0.083).	18	48.6	High risk
89	2024	ISRCTN41918550	Sweden	GDM	High-income	Swedish Research Council; ALF Funding Region Örebro; Nyckelfonden; Region Skåne R&D Foundation; Uppsala–Örebro Regional Research Committee	47080	Stepped wedge cluster randomised controlled trial (SW-CRT)	Multi-centre (17 delivery units in 11 clusters)	Open-label (pragmatic unblinded design)	Computer-generated stratified randomisation by centre size	Yes – allocation concealed until 2 months before each cluster switch	Yes – modified ITT and per-protocol analyses performed	Multiple imputation for missing confounders (BMI, education etc.)	GDM prevalence 2.6 → 6.6 %; no change in LGA (11.4 → 11.5 %, aRR 0.97 [0.91–1.02]); ↓ gestational weight gain, shoulder dystocia and perineal trauma; ↑ mild neonatal respiratory complications	34	91.9	Some concerns
90	2017	ClinicalTrials.gov NCT01783210	Italy	GDM	High-income	Policlinico University Hospital of Modena	191	Parallel, open-label randomized controlled trial	Single-centre (Policlinico di Modena, Italy)	Single-blind (obstetricians and outcome assessors blinded)	Computer-generated randomization list (1:1)	Yes – sealed opaque envelopes opened sequentially	No (complete-case analysis)	25% attrition; complete-case analysis	GDM 18.8% vs 37.1% (p=0.019); PIH 2.9% vs 21% (p=0.001); PTB 0% vs 8.1% (p=0.016); LGA 1.4% vs 11.3% (p=0.019); no diff. in SGA; adherent women: GDM 12.5% vs 41.8% (p<0.001)	27	73	High risk
91	2010	ACTRN012606000271505	Australia	GDM	High-income	Royal Brisbane and Women’s Hospital Foundation	50	Pilot parallel RCT	Single-centre	Open-label	Not fully specified; random allocation stated	Not reported	No (per-protocol)	Complete-case; women lost to follow-up excluded	Exercise ≥900 kcal/week at 28 weeks: 73% vs 42% (p=0.047). Fasting glucose lower in intervention at 28 wks (p=0.03). Insulin lower at 36 wks (p=0.05). No significant difference in HOMA-IR; GDM incidence non-significant (12% vs 0%, p=0.07).	18	48.6	Some concerns
92	2019	ClinicalTrials.gov NCT02729545	China	PCOS	Upper-middle-income	Beijing TCM Science & Technology Development Fund (JJ2015-42)	60	Parallel RCT	Single hospital (Beijing Hospital of Integrated TCM & Western Medicine)	Participants & assessors blinded to allocation process; acupuncturists not blinded	SPSS-generated random sequence; 1:1 allocation	Sealed opaque envelopes by independent administrator	Modified ITT	Complete-case; no imputation	LH/FSH change at 12 wks: −0.66 (acupuncture) vs −0.96 (CPA/EE), p=0.243. TT decreased −0.67 vs −0.33; LH decreased −3.92 vs −5.66. BMI decreased −0.9 vs −0.44. Menstrual frequency ↑ significantly in both groups. (Tables 2–3, pp. 5–6)	23	62.2	High risk
93	2007	Not reported	Norway	PCOS	High-income	Study medication supplied free by Weifa AS; institutional support	101	Two prospective randomized placebo-controlled trials	University hospital IVF unit and obstetrics departments	Double-blind (identical placebo capsules)	Randomized (method not detailed)	Not described	Not explicitly stated	Available-case analysis; varying n at later pregnancy timepoints	Metformin did not change homocysteine levels in nonpregnant or pregnant PCOS women; folate and B12 decreased in nonpregnant metformin group; no adverse pregnancy homocysteine effect	20	54.1	Some concerns
94	2019	ACTRN12615000697583	Australia	GDM	High-income	Diabetes Australia Grant Y13G-CARM	110	Randomized controlled trial (parallel-group)	Single centre (large Melbourne metropolitan hospital)	Not blinded (nature of intervention prevents blinding)	Computer-generated random number list	Not explicitly described; sealed allocation implied	Not stated	Small loss to follow-up (6 participants); complete-case analysis	Weight loss: 90.4% vs 48.3% (p<0.001); normal BMI at 12 wks: 44.2% vs 31%; postpartum OGTT attendance: 96.2% vs 70.7% (p<0.001); glycemia normalised in intervention (p=0.026); no effect on BP or birthweight	24	64.9	Some concerns
95	2014	Not reported	USA	Endometriosis	High-income	Industry funded: Neurocrine Biosciences & AbbVie	252	Phase II multicenter randomized double-blind RCT	78 U.S. centers	Double-blind (participants, investigators, most staff)	Computer-generated via IVRS	Double-dummy design	ITT used for efficacy analyses	LOCF used for secondary responder analysis	Minimal BMD change in all groups; elagolix 150 mg noninferior to DMPA-SC for dysmenorrhea & pelvic pain	29	78.4	Some concerns
96	2022	not reported	Italy	Endometriosis	High-income	none	197	Randomized Controlled Trial (RCT)	Multi-centre (Gynecological Clinics, University of Catania, University of Messina)	Open-label	Computer-generated randomization list, 1:1 allocation	not reported	yes	LOCF method	Significant intra-group improvements for CPP, dysmenorrhea, dyspareunia, QoL, FSFI/FSDS (p<0.001) Inter-group differences: DNG superior at 6-month follow-up for CPP, dysmenorrhea, dyspareunia; somatic QoL and FSFI better at 6- and 12-months Cohen’s d ranged 0.2–2.5 depending on comparison	28	75.7	High risk
97	2018	NCT02480647	Brazil	Endometriosis	Upper-middle-income	São Paulo Research Council; Brazilian National Research Council; unrestricted Merck & ICA Foundation support	103	Randomized controlled noninferiority trial (open-label)	Single university teaching hospital (Campinas, Brazil)	Open-label (no blinding possible due to nature of devices)	Computer-generated sequence; permuted blocks of 6	Opaque sealed numbered envelopes opened after consent	Modified ITT (all with ≥1 efficacy assessment)	Last-observation-carried-forward imputation; ~10% dropout	Pelvic pain ↓ ~5.6 (ENG) & ~5.5 (LNG-IUS); dysmenorrhea ↓ ~5.3 & 5.4; no between-group differences (noninferior). HRQoL improved significantly in all domains. Bleeding: ENG—amenorrhea 28.8%; LNG-IUS—spotting 22.1–36.1%.	25	67.6	Some concerns
98	2015	NCT00744965	United States	GDM	High-income	Department of Obstetrics & Gynecology, UT Southwestern (local institutional funding)	395	Randomized, double-blind, placebo-controlled trial	Single tertiary hospital (Parkland Hospital)	Double-blind (participants, clinicians, assessors blinded)	Computer-generated permuted blocks (4–10), via SAS PROC PLAN	Allocation handled by investigational pharmacy; encapsulated identical pills	Yes—analyzed all who delivered in institution (n=375)	20 lost to follow-up; no imputation; missing participants excluded	Primary outcome: No 200-g reduction in birth weight (Δ = −33 g; P=0.52). Fasting glucose ↓ 7 mg/dL glyburide vs 3 mg/dL placebo (P<0.001). No difference in LGA (11% vs 12%), SGA, hypoglycemia, NICU, hypertensive disorders, or cesarean rate.	31	83.8	Some concerns
99	2021	Not reported	Italy	Endometriosis	High-income	None declared; no conflicts	170	Prospective randomized controlled trial	Single high-volume tertiary center	Open-label (drug types distinguishable; no blinding described)	Random assignment into two groups; method not explicitly stated (likely central list)	Not described	No—per-protocol analysis (146/170)	Participants lost to follow-up removed; no imputation	Pain reduction significant in both groups at 6 and 30 months (p<.001). Tolerability higher with Dienogest (3.1 vs 2.7, p=.026). Side effects: spotting higher with Dienogest (27.7% vs 1.2%, p<.001); hot flushes higher with GnRH agonists (86% vs 12%, p<.001). No significant difference in clinical relapse (29.2% vs 18.5%, p=.168), imaging relapse (10.7% vs 7.4%, p=.56), or live birth rates.	24	64.9	High risk
100	2022	PACTR202106591503674	Tunisia	GDM	Upper-middle-income	Not specified (academic institutional study)	121	Parallel, randomized controlled trial	Single-centre (Farhat Hached University Hospital, Sousse)	Single-blind (assessors blinded; participants and educators unblinded)	Sequential sealed opaque envelopes; alternate allocation via coin method	Yes – sealed opaque envelopes	Not specified	Complete data for all 121 participants; no imputation needed	↓ hospitalizations (1.02 vs 2.38, p<0.001), ↓ cesarean (31% vs 55%, p=0.002), ↓ preterm labor (4.9% vs 25%, p=0.002), ↓ macrosomia (0% vs 42%, p<0.001), ↓ neonatal hypoglycemia (0% vs 27%, p<0.001), ↑ APGAR ≥7 (100% vs 85%, p=0.001)	26	70.3	Some concerns
101	2022	IRCT2015081723666N1, 01/02/2016	Iran	PCOS	Upper-middle-income	Iran University of Medical Sciences and Pars Advanced and Minimally Invasive Medical Manners Research Center	50	Randomized, double-blind, intra-patient control trial	Tertiary care hospitals (Rasoul-e-Akram and Pars Hospitals, Tehran)	Patient blinded (sutures masked side), sonographer blinded, analyst blinded (coded data)	Quadruple block randomization at ovary level, simple randomization via Excel	Concealed envelopes opened by a technician in OR	Yes, ITT applied	Ovaries mistakenly assigned in 1 patient were included in ITT	Endogel group: minimal adhesions <1/3 in 80.5% vs suspension 35.5%, ovarian mobility 65% vs 22%, SST and fading margin better in Endogel group, P < 0.001	26	70.3	Some concerns
102	2018	NCT02368600	Hong Kong (China)	GDM	High-income	Health and Medical Research Fund, Food and Health Bureau, Hong Kong SAR Government	220	Parallel, single-blind RCT	Single-centre (antenatal clinic, Chinese University of Hong Kong)	Single-blind (investigators and assessors blinded; participants not blinded)	Computer-generated block randomisation (block size = 6)	Yes – sealed opaque envelopes opened sequentially	Yes (ITT and per-protocol analyses)	Dropouts (26) excluded; no imputation	GDM: 25% (LMP) vs 26.7% (control), OR 0.91 (95% CI 0.46–1.83, p=0.798); ↓ excessive GWG (18.4% vs 25.9%, p=0.261); high-adherence subgroup 0% excessive GWG (p=0.049); no differences in LGA/macrosomia	27	73	Some concerns
103	2009	NCT00476567	United States	GDM	High-income	National Institutes of Health (NIDDK Grant R01 DK074876)	364	Parallel, two-arm, randomized controlled trial	Single-centre (Baystate Medical Center, Massachusetts)	Single-blind (outcome assessors and statisticians blinded)	Stratified randomisation by age (<30/≥30), BMI (<25/≥25), ethnicity (Hispanic/non-Hispanic) with 1:1 allocation (block size 4)	Yes – stratified block randomisation with sealed envelopes	Yes – intention-to-treat planned	Missing data handled with mixed models; no imputation described	Projected 30% reduction in GDM risk; primary results not reported in design paper	28	75.7	Some concerns
104	2008	NCT00497653	USA	PCOS	High-income	NIH Grants: R01HD35629, K24HD40237, K23HD049454, R01DK58698; Fond de Recherche en Santé du Québec #2834	11	Randomized controlled trial	Single center (Virginia Commonwealth University, General Clinical Research Center)	Open-label (no blinding mentioned)	Randomized to DCI or placebo; method not fully specified	not reported	not reported	not reported	Plasma DCI rose 23.5 µmol/L in DCI vs unchanged in placebo (p=0.04); AUCDCI-IPG, AUCDCI-IPG/AUCinsulin, Si, AIRg, DI, glucose, insulin, testosterone did not differ by treatment; positive correlation between change in AUCDCI-IPG/AUCinsulin ratio and Si (r=0.69, p=0.02); correlation remained after adjusting for BMI and treatment allocation	14	37.8	High risk
105	2014	Not reported	China	Endometriosis	Upper-middle-income	Changzhou Medical Innovative Youth Personnel Project (KY201139)	116	Prospective randomized controlled trial	Two affiliated university hospitals	Open-label	Random assignment (method not specified)	Not reported	Not explicitly stated	9 dropouts excluded; complete-case analysis	KMI increase after GnRH-a: +2.87±1.40 (Remifemin) vs +2.70±1.26 (Tibolone), p>0.05. Hot flash/sweating score increase: +0.94±1.72 vs +1.06±1.78, p>0.05. E2 after treatment: significantly lower with Remifemin vs Tibolone (p<0.05). FSH & LH: higher in Remifemin vs Tibolone (p<0.05). Liver & renal markers: no significant changes in either group (all p>0.05). Lipids: no significant changes (all p>0.0…	22	59.5	High risk
106	2015	Not reported	China	Endometriosis	Upper-middle-income	Changzhou Medical Innovative Youth Personnel Project (Changzhou Health and Science [2010] No. 368 KY201139)	90	Randomized double-blind controlled trial (three-arm)	Two tertiary hospitals (gynecology departments)	Double-blind (Kuntai vs Tibolone; control unblinded)	Random allocation (method not detailed)	Not described	No – per-protocol analysis only	Dropouts excluded; no imputation	KMI and hot-flash scores significantly lower in Kuntai and Tibolone vs control at weeks 8 and 12 (P<0.05); no difference between Kuntai and Tibolone; adverse events lower with Kuntai (32% vs 72%)	24	64.9	High risk
107	2016	NCT01841528	China	PCOS	Upper-middle-income	National Basic Research Program of China (973 Program); National Natural Science Foundation of China; Shandong key R&D program	1508	Randomized controlled trial (parallel)	Multiple centres (China)	Open-label (participants, clinicians not blinded); outcome assessors masked	Computer-generated random sequence	Sealed opaque envelopes	Yes (primary ITT analysis reported)	Minimal loss; some withdrawals; complete-case with no imputation	Live birth: 49.3% frozen vs 42.0% fresh (RR 1.17, 95% CI 1.05–1.31). OHSS: 1.3% frozen vs 7.1% fresh (P<0.001). Higher pregnancy loss in fresh group. Neonatal outcomes largely similar.	33	89.2	Some concerns
108	2024	ChiCTR2300069638	China	PCOS	Upper-middle-income	National Social Science Foundation of China (Grant 81974242); Joint Project U20A20349	220	Pragmatic randomized controlled trial	Single-centre tertiary hospital (Union Hospital, Tongji Medical College)	Open-label for participants & physicians; evaluators blinded	Computer-generated random number table	Concealment partly implied—clinician knew order but not code meaning; sonographers/statisticians/outcome evaluators blinded	No (per-protocol only)	14 cycles had incomplete data; excluded from complete data analysis; no imputation	CPR 72.7% vs 59.1% (RR 1.23, 95% CI 1.02–1.49, p=0.033); Clinical pregnancy per cycle 38.3% vs 27.7% (RR 1.38, p=0.018); higher biochemical pregnancy (40.7% vs 28.3%, p=0.005)	25	67.6	High risk
109	2025	ChiCTR2400090908	China	PCOS	Upper-middle-income	Chongqing Medical Scientific Research Project; National Natural Science Foundation of China; CSTC Grants	84	Prospective randomized controlled open-label parallel trial	Single-centre (Second Affiliated Hospital, Chongqing Medical University)	Open-label (no participant or provider blinding)	Computer-generated random numbers (1:1)	Not explicitly detailed, but sequence generation independent	No ITT; complete-case analyses used	Complete-case only; no imputation reported	Weight loss: −6.09 kg vs −2.25 kg; BMI and WHR greater reduction in COM; larger improvements in TEST, SHBG, FAI; CRP reduction only in COM; menstrual recovery 72.5% vs 42.3%; natural pregnancy rate 35% vs 15%	26	70.3	High risk
110	2005	NR	Taiwan	Endometriosis	Upper-middle-income	Taipei Veterans General Hospital grant VGH94-195	59	Randomized, parallel-group, comparative controlled trial.	multicentre hospital-based	NR	NR	NR	Yes. All 59 randomized patients considered ITT population.	NR	Efficacy: Significant improvement in TSSS and symptom domains in both groups; no significant difference between nafarelin and danazol at 90 or 180 days. Laparoscopic score: Significant reduction with nafarelin (−4.2; p=0.047) but not danazol; between-group difference NS. Lipid profile: Danazol caused marked ↓HDL and ↑LDL; nafarelin showed significantly less adverse lipid changes.	17	45.9	Some concerns
111	2010	Not reported	China	PCOS	Upper-middle-income	Not reported	60	Prospective randomized placebo-controlled trial (pilot)	University reproductive health centre	Double-blind (metformin vs placebo)	Random assignment to treatment groups	Identical placebo tablets used	Yes – dropouts included after ≥1 cycle	Dropouts included in final analysis; complete-case per cycle	Mono-ovulatory rate: 66.2% vs 48.4% (p=0.04). Dominant follicles (HCG day): 1.55±0.09 vs 1.87±0.10 (p=0.02). Estradiol peak (pg/mL): 662.8±30.8 vs 894.9±29.3 (p<0.001). HMG vials/cycle: 9.39±0.21 vs 10.74±0.24 (p<0.001). Ovulation rate: 94.7% vs 87.3% (NS). Cumulative pregnancy rate: 43.3% vs 20.0% (NS). Third-cycle pregnancy rate: 20.0% vs 3.3% (p=0.04). OHSS: 6.6% vs 11.8% (NS).	19	51.4	Some concerns
112	2022	IRCT20200608047697N1	Iran	PCOS	Upper-middle-income	Kermanshah University of Medical Sciences (Grant No. 990412)	199	Double-blind placebo-controlled RCT	Gynecology and infertility clinics (single regional setting)	Double-blind (participants & researchers)	Random number table method	Yes—coded supplement packs; researchers & participants blinded	No ITT (per-protocol analysis only)	Five dropouts; complete-case analysis	Significant ↓ in FTO, CPT1A, LEPR, LAMIN expression (P<0.001); ↑ PPAR-γ (P<0.001); ↓ weight, BMI, WC, BFM; improved FBS, HbA1c, insulin, HOMA-IR; ↓ LH, androgens	28	75.7	Some concerns
113	2022	IRCT20200608047697N1	Iran	PCOS	Upper-middle-income	Kermanshah University of Medical Sciences (Grant 990412)	199	Double-blind, placebo-controlled randomized clinical trial	Single academic center (Kermanshah University clinics)	Double-blind (participants + researchers)	Random number table	Capsules coded by manufacturing company; allocation concealed from participants and researchers	Yes (194 analyzed)	No imputation; complete-case; COVID-19 dropouts excluded	TNF-α ↓7.34→5.52 pg/mL (p<0.001); IL-6 ↓2.65→1.53 pg/mL (p<0.001); CRP ↓1.56→1.41 mg/mL (p<0.001). TNF-α and CRP gene expression significantly downregulated. Androstenedione, DHEA, LH decreased; FSH increased. 40.6% had resolution of ovarian cysts vs 24.7% in placebo.	29	78.4	Low risk
114	2011	None reported	Australia	GDM	High-income	Part-funded by Diabetes Australia Research Grant	43	Pilot parallel RCT	Single tertiary centre (Westmead Hospital, Sydney)	Unblinded; outcome assessors not blinded	Simple randomisation after baseline OGTT (method not fully described)	Not described	No ITT	High missing data: 3 pregnancies, 6 withdrawals, 5 missing pedometer data; analysis only on available cases	PA target: 10,000 steps/day achieved by 30.8% vs 18.8% (P=0.34); ≥150 min/week PA: 77.8% vs 68.8% (P=0.70); BMI change NS; OGTT shift minimal	16	43.2	High risk
115	2019	ACTRN12616000067471	Australia	GDM	High-income	Australian Diabetes Society–Sanofi Diabetes Research Grant	60	Randomised controlled pilot trial (2:1 allocation)	Single tertiary centre (Westmead Hospital, Sydney)	Open-label (analyst blinded)	Computer-generated permuted block randomisation (block size 4)	Yes – independent allocation	Yes – intention-to-treat	No imputation; partial-case analyses (77% completed some data)	No sig diff in postpartum GTT (70% vs 65%), PA or weight change; ↑ fat intake (37% vs 31%, p=0.03), ↓ carb intake (39% vs 48%, p=0.008)	27	73	High risk
116	2024	ACTRN12620000615987	Australia	GDM	High-income	Sydney Health Partners Medical Research Futures Fund; Westmead Applied Research Centre Scholarship	177	Parallel double-blind RCT	Multicentre (3 tertiary hospitals, Sydney)	Single-blind (statisticians); participants unblinded	Computerised randomisation (1:1) using permuted blocks (sizes 4 & 6) stratified by site	Yes – centralised, blinded statistician	Yes (ITT)	Partial – missing components imputed based on rules for composite endpoint	Primary: 7/57 (12%) vs 6/56 (11%), RR 1.15 (95% CI 0.41–3.20), p=0.79; PA goal met: 47% vs 63%, p=0.08; step usage days: 102 ± 59 vs 80 ± 59, p=0.03	30	81.1	High risk
117	2018	NCT02108197	Thailand	GDM	Upper-middle-income	Faculty of Medicine Ramathibodi Hospital (Mahidol University); equipment support from ResMed Thailand	36	Randomized controlled trial	Single tertiary referral hospital (Ramathibodi Hospital)	Open-label; outcome assessors unblinded	Permuted block randomization, 1:1	Not blinded (no sham CPAP)	Yes – ITT used for primary analysis	PP and IV analyses also performed; no imputation described	ITT: no sig change in FPG or AUC; PP: improved β-cell function (MD 2.4, 95% CI 0.5–4.3; P=0.016); IV: improved insulin sensitivity, secretion, and disposition index (P values .015–.002).	21	56.8	High risk
118	2009	ISRCTN58369615	UK	PCOS	High-income	University of Hull	30	Randomized, open-label, parallel RCT	Single endocrine outpatient clinic (Hull Royal Infirmary)	Open-label	Computer program	None (open-label)	No	All completed; no imputation	Pioglitazone ↓HOMA-IR by 41% (p=0.005); orlistat ↓HOMA-IR by 19.7% (p=0.013); metformin NS (16.1%, p=0.17). Only orlistat ↓IR variability significantly (41.8%, p=0.015). All ↓FAI significantly.	18	48.6	High risk
119	2025	NCT03325023 (clinicaltrials.gov; registered 26/10/2017)	Poland	PCOS	High-income	not reported	65	Randomized, double-blind, placebo-controlled trial (parallel design)	Single-center (Reproductive Endocrinology and Infertility Clinical Services, Poznan University of Medical Sciences)	Double-blind (participants and investigators)	Block randomization (blocks of 4) using GraphPad QuickCalcs	not reported	not reported	not reported	Significant reductions in testosterone, LH, LH:FSH ratio, fasting insulin, total cholesterol, LDL-C, triglycerides, LPS, LPS:HDL, and LBP in Synbiotic Group vs Placebo; BMI/body fat reduction significant in both groups but no significant difference between groups	23	62.2	High risk
120	2005	Not reported	U.K.	PCOS	High-income	Dermatrust	88	Randomized controlled trial (parallel-group)	NHS teaching hospital	Single-blind (participants and outcome assessor)	Random numbers table	Not blinded to treating physician; concealed from participants and psychologist	Yes – ITT reported	Baseline observation carried forward for missing outcomes	Greater reduction in hair severity (7.3→3.6 vs 7.1→6.1); depression, anxiety, QoL psychological domain all significantly improved; time spent removing hair dropped substantially	20	54.1	Some concerns
121	2025	RBR-4wjqxcv	Brazil	PCOS	Upper-middle-income	FAPESC (Santa Catarina Research Support Fund), Brazil	29	Randomized controlled trial (pilot RCT)	University clinic (single centre)	Assessor-blinded; professionals performing assessments blinded; participants not blinded	Randomizer.org	Not explicitly described; baseline characteristics balanced	No explicit ITT; per-protocol final sample (n=24)	Excluded dropouts; complete-case analysis	Significant between-group differences: DHEA (P=0.045), LH (P=0.017), FSH (P=0.014). Non-significant: testosterone (P>0.05). Clinical signs improved but not statistically significant.	24	64.9	High risk
122	2021	EudraCT 2016-001719-19	Sweden	PMDD	High-income	Swedish Research Council; Swedish Society of Medicine; drug supplied by Gedeon Richter	95	Multicenter, double-blind, parallel-group RCT	University hospitals in Sweden	Double-blind (participants & investigators)	Computer-generated random sequence; block size 4	Yes – codes held externally until analysis completed	Yes – ITT stated and applied	Missing diary days handled by excluding >40% missing; otherwise retained	Mean DRSP improvement 41% vs 22%; significant reductions in depressive and irritability subscales; remission 50% vs 21%; no effect on physical symptoms	31	83.8	Some concerns
123	2018	NCT01899001	USA	PCOS	High-income	NIH training grant; Penn Presbyterian Harrison Award; NIH P50 MH099910; K12 HD085848	33	Open-label pilot RCT	Single tertiary PCOS center (University of Pennsylvania)	Open-label; outcome assessors/statisticians blinded for some measures	Computerized REDCap randomization	Allocation blinded to study team until assignment; override for 3 subjects due to dropout concerns	Yes – ITT stated (all with any data included)	No imputation; analyses include available observations	Weekly weight loss: −0.35 kg/wk vs −0.16 kg/wk (p=0.033). QoL improvement at 8 wks: +3.7 vs +1.2 (p=0.021). CES-D ↓0.31 pts/week overall. CBT+LS improved stress response (lower HR at +15 min, p=0.020).	26	70.3	Some concerns
124	2024	ISRCTN97865475	UK	Endometriosis	High-income	NIHR (Ref: 11/114/01)	405	Pragmatic, parallel-group, open-label RCT	34 UK gynaecology clinics	open-labled	Central internet randomisation with minimisation (age, stage, extent of excision, centre, LAP selection, reason for LAP choice)	Concealed through centralised randomisation	yes	Sensitivity analysis using multiple imputation	Primary outcome: EHP-30 pain score at 3 years; adjusted mean difference −0.8 (95% CI −5.7 to 4.2, P=0.76); 33% reduction in time to treatment failure with LAP (HR 0.67, 95% CI 0.44–1.00)	34	91.9	High risk
125	2024	ISRCTN97865475	United Kingdom	Endometriosis	High-income	NIHR Health Technology Assessment Programme (award 11/114/01)	405	Randomized controlled multicentre pragmatic trial	34 UK NHS hospitals	Open-label (participants and clinicians unblinded); outcome assessors not blinded	Secure web-based randomisation; 1:1 allocation	Allocation via trial system; not blinded to clinicians or participants	Yes – primary analysis ITT	Imputation used for missing EHP-30 pain scores; worst-case and multiple imputation sensitivity analyses	No difference in pain at 36 months: AMD −0.8 (95% CI −5.7 to 4.2, p=0.76). LARC group had fewer surgical or second-line treatments: 73 vs 97; HR 0.67 (95% CI 0.44–1.00). QoL marginally favoured COCP (QALY +0.043) but costs £533 higher for COCP	35	94.6	Some concerns
126	2011	NCT00734448	Italy	GDM	High-income	Not stated	84	Randomized controlled trial	Single university obstetric centre	Open-label	Computer-generated 1:2 allocation	Not explicitly described	No ITT	Insulin-treated and preterm women excluded from analysis (per-protocol)	HOMA-IR ↓50% vs ↓29% (P=0.0001); adiponectin ↑28% vs ↓7% (P=0.009); fasting glucose & insulin ↓ significantly in both groups	18	48.6	High risk
127	2010	ACTRN012605000217606	Australia	Endometriosis	High-income	Australian Gynaecological Endoscopy Society (AGES) Grant 2003–2004; Royal Hospital for Women Foundation Grant 2003	66	Prospective randomized double-blind placebo-controlled trial	University teaching hospital endogynaecology department	Double-blind (participants, surgeons, anesthetists, assessors)	Computer-generated random numbers	Yes – central randomisation by telephone to third party	No – analysis by available cases only	Available-case analysis; losses described; no imputation	Total hospital opioid use significantly reduced (19.0 vs 34.5 mg morphine equivalents; p=0.017); no difference in pain scores; no difference in discharge timing	29	78.4	Some concerns
128	2022	ACTRN12615000282583	New Zealand	GDM	High-income	Health Research Council of New Zealand (Grant 14/499)	1100	Stepped-wedge cluster RCT	Multicentre (10 hospitals across NZ)	Participants blinded to target group; investigators aware	Computer-generated randomization (paired hospitals at 4-month intervals)	Yes – concealed until 2 weeks pre-implementation	Yes – ITT analysis	Complete-case; <1% loss to follow-up	LGA: 14.7% vs 15.1% (adjRR 0.96, 95% CI 0.66–1.40, p=0.84); serious infant morbidity ↓ (1.3% vs 2.6%, adjRR 0.23, 95% CI 0.06–0.88, p=0.03); serious maternal morbidity ↑ (5.9% vs 3.0%, adjRR 2.29, 95% CI 1.14–4.59, p=0.02); pharmacologic therapy ↑ (68% vs 59%, p=0.047)	36	97.3	Some concerns
129	2012	Not registered	Brazil	PCOS	Upper-middle-income	Not stated	40	Prospective randomized clinical trial	University tertiary gynecology & endocrinology centers (São Paulo)	Open-label	Computer program assigned participants into groups	None reported	No (per-protocol only)	Only completers included; no imputation	MCI increased significantly in both groups (~67% improvement). BMI decreased in both; WC decreased only in lifestyle group (p<0.001). Testosterone and androstenedione decreased significantly only in metformin group (p=0.002 & 0.005). No differences between groups at 6 months.	22	59.5	Some concerns
130	2009	NCT00620529	Australia	PCOS	High-income	Pfizer Australia CV & Lipid Research Grant; NHMRC Clinical Centre of Excellence; institutional support	25	Double-blind randomized crossover RCT	Tertiary cardiovascular/endocrine research centres	Double-blind; capsules identical	Computer-generated randomization to two sequences	Central pharmacy held coded bottles; investigator & participant blinded	Not explicitly ITT; per-protocol (all 25 completed both arms)	No imputation; full dataset available	Primary outcome: Liver fat ↓ from 10.2% to 8.4% on omega-3 (P=0.022). Triglycerides ↓ (P=0.002). SBP ↓ (P=0.018). DBP ↓ (P=0.005). No effect on BMI, NEFA, insulin resistance or androgens.	25	67.6	Some concerns
131	2023	ChiCTR1900022971	China	PCOS	Upper-middle-income	No financial/commercial conflicts reported	174	Parallel 1:1 RCT	Single tertiary hospital reproductive centre	Open-label for participants/clinicians; assessors blinded	Computer-generated random number table (SPSS); 1:1	Doctors knew order but blinded to meaning of codes until assignment; sonographers and statisticians blinded	Yes — ITT applied	Missing = assumed no live birth for ITT; no imputation	Ovulation: 90.8% vs 70.1% (RR 1.30, p=0.001); Live birth: 23.0% vs 10.3% (RR 2.22, p=0.025); Higher conception, clinical pregnancy, ongoing pregnancy in sequential group	28	75.7	Some concerns
132	2015	Not reported	Egypt	PCOS	Lower-middle-income	Not reported	85	Randomized controlled trial	Single university maternity hospital (El-Shatby, Alexandria)	Not blinded (no statement of blinding)	Closed envelope method	Sealed opaque envelopes	No	Per-protocol only (83 analyzed)	Ovulation: 51.2% vs 12.5% (p<0.0001); Pregnancy: 23.3% vs 2.5% (p=0.005); Endometrium: 7.67 vs 6.61 mm (p=0.001); Progesterone: 9.7 vs 8.2 ng/mL (p=0.01)	19	51.4	Some concerns
133	2025	NCT03802877	Canada	GDM	High-income	Lawson Foundation	227	2×2 factorial RCT (feasibility)	Multicentre (5 diabetes clinics)	Open-label; assessors not blinded	Block randomisation (size 4) via independent statistician; REDCap automated assignment	Yes	No (complete-case)	Complete-case; missing due to delivery/technical failures	Steps/day decline prevented in Track & Target arm only (−59 vs −1456 control). Coaching-only and combined arms declined (−1183; −915). GWG similar across arms; within guideline range.	27	73	Some concerns
134	2022	ACTRN12617000135314	Malaysia	PCOS	Upper-middle-income	Ministry of Science, Technology, and Innovation (Malaysia)	85	Randomized controlled trial (single-blind)	Single-center university setting	Single-blind: statistician only	Block randomisation based on faculty location; 1:1 ratio	Allocation sequence generated by independent researcher; not concealed (participants & researchers aware)	No (per-protocol analysis only)	Participants with <70% attendance excluded; no imputation	Significant improvements: nutrition knowledge 1 (p<0.001), nutrition knowledge 2 (p=0.01); IPAQ score (p=0.02); PA practice score (p<0.001). No significant changes: nutrition attitude/practice, eating behaviours (EAT-26, TFEQ), lipid profile, FPG. Weight/BMI reduced modestly.	23	62.2	High risk
135	2018	IRCT20170513033941N27	Iran	PCOS	Upper-middle-income	Vice-Chancellor for Research, Kashan University of Medical Sciences	40	Randomized double-blind placebo-controlled trial	Infertility research center and IVF clinic	Double-blind (participants, investigators, analysts)	Random number table	Yes – concealed until completion of analysis	Yes – explicitly stated	ITT applied; dropouts retained in analysis; no imputation described	Vitamin D significantly reduced insulin (−1.4 vs −0.3 μIU/mL, P=0.007), HOMA-IR (−0.3 vs −0.1, P=0.008), AMH (P=0.02), total cholesterol (P=0.03) and LDL-C (P=0.04); up-regulation of PPAR-γ, GLUT-1 and LDLR gene expression	30	81.1	Low risk
136	2020	NCT03383484	USA	PCOS	High-income	AOA Grant #181627705	25	Randomized controlled pilot trial	Single region; mixed clinical & academic settings	Data collectors blinded; participants not blinded → single-blind	Random assignment using sequential unique identifiers	Not described; unclear if allocation was concealed	No — per-protocol only (dropouts excluded)	No imputation; complete-case only	OMT group: ↓ postexercise SBP 135.8→129.1 mmHg (p=.0002); HRR trend 23.2→29.4 s (p=.10); slight ↓ free T 5.69→4.64 pg/mL (NS). No significant endocrine/metabolic effects. Control: No significant changes; ↑ DHEA-S (p=.0038).	21	56.8	High risk
137	2021	NCT02309138	USA	GDM	High-income	NIH NICHD R01HD079647; Clinical & Translational Science Institute UL1TR001857	921	Single-centre parallel-group RCT	10 obstetric clinics linked to UPMC Magee Women’s Hospital	Participants and clinicians blinded to test method; statistician unblinded; OGTT staff blinded	Stratified block randomization with varying block sizes; stratified by clinic type	Participants and clinicians blinded to screening method; centralized allocation	Yes – ITT explicitly	No imputation; complete-case; sensitivity adjusting for marital status	LGA 7.7% vs 8.5% (RR 0.90, 97.5% CI 0.53–1.52); SGA 12.0% vs 12.9%; neonatal morbidity higher in IADPSG (RR 1.40, 95% CI 1.03–1.91); GDM incidence 14.4% vs 4.5% (P<.001)	33	89.2	Low risk
138	2016	EudraCT 2012-000784-25; NCT01682642	Belgium	Endometriosis	High-income	None (no external funding)	120	Randomized controlled trial (open-label)	Single IVF center (Ghent)	Open-label	Computer-generated sequence by study coordinator	None stated (no blinding; groups allocated openly)	Not explicitly stated; effectively complete-case	One dropout; 119 analysed	MII oocytes: 8.2 vs 8.2 (P=.941). Pregnancy rate: 39.3% vs 39.7% (P=.972). FSH dose higher with GnRH group (+258 IU, P=.025). Stimulation longer (12.3 vs 11.3 days, P=.004). No differences in embryo quality or freezing.	26	70.3	Some concerns
139	2024	IRCT20220920055998N1	Iran	PMDD	Upper-middle-income	None (no funding)	48	Parallel-group RCT	Outpatient psychology clinic	Single-blind (assessors & analysts blinded); participants & therapist unblinded	Excel-generated random blocks (size 4)	Research assistant aware; no explicit concealment procedure	No (per-protocol; only completers analyzed)	No imputation; dropouts reported	PSST ↓ ~14 points (p<0.001); DERS ↓ ~32 (p<0.001); Depression ↓ 6.6 (p=0.003); Stress ↓ 9.4 (p=0.003); Anxiety = NS; control group worsened in depression/anxiety	28	75.7	Some concerns
140	2021	NCT03572075	Italy	Endometriosis	High-income	Not reported	34	Randomized controlled trial (parallel-group)	Single-centre referral hospital	Sonographers assessing LHA blinded; participants unblinded	Computer-generated block randomization	Opaque sealed envelopes	Yes – all randomized patients analysed	No imputation (complete-case)	LHA on Valsalva: +20.0% vs –0.5% (P=0.02); superficial dyspareunia: –3 vs 0 (P<0.01); CPP improved (P=0.01)	24	64.9	Some concerns
141	2005	Not reported	Turkey	PCOS	Upper-middle-income	Not reported	40	Randomized open-label two-arm trial	Single academic endocrine/metabolic center	Open-label	Computer-generated random codes at trial centre	Not described	Yes – ITT defined as baseline + ≥1 follow-up; LOCF used	LOCF for withdrawals (4 withdrawals total)	Metabolic: HOMA-IR ↓33.5% (4 mg) vs ↓27% (2 mg).Fasting glucose ↓9.2% (4 mg) / ↓9% (2 mg).2-h glucose significantly improved, greater in 4 mg.Endocrine: Free testosterone ↓36.5% (4 mg) vs ↓31.9% (2 mg). Estradiol ↑; estrone ↓.Ovulation: At final visit: 17/20 ovulatory (4 mg) vs 14/20 (2 mg).Hirsutism: Ferriman–Gallwey scores decreased slightly in both arms.Glucose normalization: 95% (4 mg) vs 75%…	17	45.9	High risk
142	2023	ISRCTN36687466	UK	PCOS	High-income	H. Deshmukh funded by NIHR clinical lectureship Sponsor: Hull University Teaching Hospitals NHS Trust	40	Open-label randomised controlled trial (RCT)	Single centre, research Centre, Hull Royal Infirmary (UK)	Open-label (no blinding of participants or investigators)	1:1 ratio using online web-based randomisation service (randomizer.org)	Performed by an independent individual (unit manager) who generated allocations independently of study team. Concealment method explicitly: adequate.	not reported	not reported	Key findings: Weight loss greater in VLCD (−10.9%) vs energy deficit (−3.9%) (p < 0.0001) Trend towards greater reduction in FAI (−32.3% vs −7.7%, p = 0.07) 18% VLCD participants achieved biochemical remission of PCOS Significant increases in SHBG and reductions in fasting glucose and WHR in VLCD group	29	78.4	High risk
143	2020	ClinicalTrials.gov NCT02122380	United States	PCOS	High-income	NIH grants (UL1 TR000445-06; DK059637; DK020593; K23HL11962; R01HL125426).	23	Double-blind, randomized, placebo-controlled, crossover trial (two 1-month periods, 8-week washout).	Single centre	Double-blind: participants and investigators blinded; matched placebo tablets used.	Block randomization algorithm assigning treatment order (Sitagliptin → Placebo or Placebo → Sitagliptin).	NR	NR	Missing GH samples excluded pairwise. No imputation.	Glucose: Reduced peak OGTT glucose by −17.2 mg/dL (P<0.01). Reduced AUC (P<0.01). Insulin: Enhanced early insulin secretion (insulinogenic index 1.9 → 3.2; P=0.02). VAT: VAT mass ↓ from 1141.9 g to 1055.1 g (P=0.02). Lipids: Total cholesterol ↓ (P=0.02). GH secretion: GH half-life ↑ 13.9 → 17.0 min (P=0.04); interpulse interval ↑ (P<0.05); no change in GH AUC or mean GH. Vascular function: No eff…	27	73	Some concerns
144	2022	NCT04471012	Turkey	PCOS	Upper-middle-income	None (no external funding)	67	Prospective randomized controlled trial	University health sciences faculties (screening) + gynecology clinic (diagnosis and follow-up)	No blinding possible (behavioral intervention)	Simple randomization using numbered papers drawn from bags; groups balanced by BMI, age, menstrual irregularity	None (not blinded; counseling intervention precluded blinding)	No ITT; per-protocol analysis	3 dropouts removed (2 control, 1 intervention)	Anthropometrics: Significant decreases in weight (67.3→63.9 kg), BMI (25.5→24.1), waist (82.4→80.2), hip (103.7→101.7), and mFG (9.0→7.3) in intervention group (all p<0.001). Menstrual regularity: Posttest cycle length significantly improved vs control (32.4±6.3 vs 37.0±6.4; p=0.000). Behavioral: Physical activity scores ↑ (median 2→4.5, p<0.001); healthy nutrition stage ↑ (median 2→5, p<0.001). …	22	59.5	High risk
145	2024	NCT05386706	China	PCOS	Upper-middle-income	Shanghai Tenth People’s Hospital Funding (YNCR2C013) National Natural Science Foundation of China (81601269, 82170861, 82103713, 81970677) SHDC Clinical Research Plan (SHDC2020CR1017B) Partial funding by Hangzhou Kang Ming Information Technology Co, Ltd WeChat mini program provided by Shanghai Zoey Information Technology Co, Ltd	80	Randomized controlled trial	single centre	Participants not blinded	Randomized 1:1	not reported	Yes	ITT principle used; dropouts handled in analysis	HOMA-IR: digital –0.93, metformin –1.07, difference –0.20, P=.62; waist circumference, waist-to-hip ratio, fat mass significantly better in digital; no major difference in other outcomes	31	83.8	High risk
146	2018	NCT02371343	Turkey	GDM	Upper-middle-income	Republic of Turkey Ministry of Health General Directorate for Health Research	120	Randomised controlled trial	Multicentre (3 tertiary maternity hospitals in Turkey)	Double-blind (participants and study team unaware)	Balanced block randomisation; sealed opaque envelopes	Yes – sealed opaque envelopes; participants and staff unaware of allocation	Not explicitly stated	No imputation described; some dropouts pre-analysis; 120/140 completed	Fish-oil group infants had ~250 g lower birthweight (p=0.04); higher CpG-1044 & CpG-611 methylation (p=0.02, p=0.001); lower IGF-1 (p=0.001); multivariate model attenuated birthweight effect	28	75.7	Some concerns
147	2022	NCT03264638	China	PCOS	Upper-middle-income	Not reported	117	Prospective open-label parallel RCT	Single academic tertiary center (PUMCH, Beijing)	Open-label	Computer-generated random numbers	Not described	No	Complete-case analysis; no missing data reported	Diane-35 & combo ↓ testosterone ~0.14 ng/mL (p<0.05); LH ↓ significantly in B & C; fasting glucose ↓ in all groups; TC ↑ in B & C; identified 6-metabolite biomarker panel (AUC >0.96) (Fig. 3)	20	54.1	High risk
148	2025	ChiCTR2200061807	China	PCOS	Upper-middle-income	Science & Technology Innovation Project of Chinese Academy of TCM (2021A02412)	134	Randomized, single-blind, sham-controlled RCT	Single centre (Xiyuan Hospital, Beijing)	Single-blind (participants/some assessors); practitioners unblinded	SAS-generated sequence; sealed opaque envelopes	Yes—sealed envelopes	Yes—1 withdrawal analyzed in assigned group	1 withdrawal treated as ITT; no imputation needed	Ovulation rate 77.97% vs 49.74% (p<0.001); pregnancy across 3 cycles 56.7% vs 29.9% (HR 2.09, 95%CI 1.21–3.58, p=0.002); T significantly ↓ in acupuncture group (p=0.005); PI/RI ↓ significantly (p<0.001); Salle ORR 86.4% vs 67.2% (p=0.009)	30	81.1	Some concerns
149	2016	Not reported	Turkey	PCOS	Upper-middle-income	Not reported	37	Prospective randomized controlled trial	University endocrinology outpatient clinic	Open-label (assessor for FGS blinded)	Random assignment to two treatment arms	Not reported	No – per-protocol analysis	High attrition before completion; only completers analyzed	Hirsutism (FGS): spironolactone 14.7±0.9 → 11.0±1.0 (−25.2%, p<0.05); combination 12.7±1.1 → 9.1±0.7 (−28.3%, p<0.05); between-group p>0.05. BMI: no significant change in either group (22.1→22.0 vs 23.3→22.9; NS). HOMA-IR: spironolactone 1.09±0.2 → 1.01±0.2 (NS); combination 1.45±0.2 → 1.51±0.2 (NS). Free testosterone: spironolactone −18.6% (p<0.05); no significant change with combination. FSH: s…	18	48.6	High risk
150	2015	ClinicalTrials.gov NCT00474851	United States	Endometriosis	High-income	NICHD; NIH CTSA Harvard; McCarthy Family Foundation; Thrasher Research Fund; Boston Children’s Hospital; study drugs donated by Abbott, Duramed & Wyeth	53	Randomized double-blind placebo-controlled trial	Single tertiary academic children’s hospital	Double-blind (participants, clinicians, investigators)	Permuted-block randomisation prepared by statistician	Yes – pharmacy-controlled sequential study IDs	Yes – explicitly stated	ITT with all available repeated measures; dropouts retained	Total body BMD: +0.012 g/cm² at 12 mo with NA+CEE (p=0.05); no change with NA+placebo (p=0.65); between-group p=0.10. Total body bone mineral content: +37 g with NA+CEE (p<0.001) vs +15 g with placebo (NS); between-group p=0.02. Lean mass: +1.4 kg with NA+CEE (p=0.001); placebo NS; between-group p=0.006. Pain (SF-36): sustained improvement with NA+CEE (+12) vs placebo (+8); between-group p=0.008.…	33	89.2	Some concerns
151	2023	ClinicalTrials.gov NCT04109378	Hungary	Endometriosis	High-income	None reported	91	Prospective randomized controlled trial (parallel, open-label)	Single university hospital	No blinding (not feasible)	Computer-based simple randomisation (random.org coin flip)	Yes – independent staff generated allocation	Yes – explicitly stated	One loss to follow-up; ITT otherwise retained	LARS score: NOSE 22.2±11.7 → 16.3±14.2 (P=0.87); CLR 21.4±10.2 → 17.9±11.2 (P=0.93); between-group Δ: P=0.923. GIQLI: NOSE 96.2±16.1 → 112.1±16.8 (P=0.001); CLR 95.4±23.1 → 111.4±18.5 (P=0.002); Δ between groups P=0.654. Pain VAS: chronic pelvic pain ↓ NOSE −4.3±3.5 vs CLR −3.3±4.1 (P=0.331). Dyspareunia: −3.8±3.5 vs −3.4±3.9 (P=0.903). Dyschezia: −3.0±3.5 vs −3.6±4.3 (P=0.281). Severe complicati…	29	78.4	High risk
152	2015	IRCT201405181597N3	Iran	GDM	Upper-middle-income	Tehran Darou Pharmaceuticals (provided probiotic capsules); supported by Shahid Beheshti University of Medical Sciences	64	Double-blind, placebo-controlled randomized clinical trial	Single-centre (Alzahra University Hospital, Tabriz)	Double-blind (participants, clinicians, analysts)	Block randomisation stratified by baseline FBS and BMI	Yes – capsules coded “A/B” by independent coder	No (per-protocol)	Complete-case analysis; no imputation	↓ FBS −14.7% vs −7.4% (p=0.03); ↓ HOMA-IR −6.7% vs +6.5% (p=0.03); ↑ QUICKI +5.8% vs +1.4% (p=0.12); ↓ late pregnancy weight gain (p=0.02)	26	70.3	Some concerns
153	2006	Not reported	Italy	PCOS	High-income	Not reported	40	Parallel randomized controlled trial	Single university IVF unit	Open-label	Randomly divided into two groups (method not specified)	Not reported	Not stated	Complete-case analysis; no missing outcome data	rFSH ampoules: 18±6 vs 24±8 (p<0.05). Estradiol on hCG day: 2400±600 vs 3370±900 pg/mL (p<0.05). Follicles ≥14 mm: 18±1.2 vs 19±1.7 (NS). Oocytes retrieved: 13±4.4 vs 14±5.1 (NS). Mature oocytes: 8.4±1.5 vs 5.0±1.5 (p<0.05). Grade A embryos: 2.5±0.5 vs 2.2±0.3 (NS). Cancelled cycles: 5% vs 15% (p<0.05). OHSS: 5% vs 15% (p<0.05).	15	40.5	High risk
154	2022	ChiCTR-TRC-12002529	United states	PCOS	High-income	not reported	15	Randomized, placebo-controlled clinical trial (pilot study)	Single-center (Columbia University, New York)	Double-blind (participants + study staff blinded)	Computer-generated random assignment (1:1)	not mentioned	no	Excluded those lost to follow-up; no imputation	Cinnamon group: • Fasting glucose ↓ 16.9% (P=.03) • QUICKI ↑ (P=.03) • HOMA-IR ↓ 44.5% (P=.03) • OGTT AUC glucose ↓ 21% (P=.03) • Matsuda Index ↑ 122% (P=.05) Placebo: minimal change	34	91.9	High risk
155	2020	NCT02778399	USA + Europe (multinational)	Endometriosis	High-income	ObsEva S.A (industry-sponsored)	328	Multinational, multicenter, parallel-group RCT	62 clinical centers	Double-blind (participants, investigators, sponsor)	Computer-generated, block randomization (SAS v9.2)	Identical placebo tablets; allocation concealed (appearance matched)	Yes – Full Analysis Set based on randomized participants with ≥1 post-baseline measure	Missing values handled via repeated-measures models; no imputation	Significant ≥30% reduction in pelvic pain with 75–200 mg: 61.5%, 56.4%, 56.3% vs placebo 34.5%; dose-dependent estradiol suppression; BMD loss <1% at 50–75 mg but >3% at 200 mg	36	97.3	Low risk
156	2024	NCT03992846	Multinational (USA + 11 European countries)	Endometriosis	High-income	ObsEva (sponsor); additional support from Theramex & Kissei; FNRS grant 5/4/150/5	486	Phase 3, multicenter, randomized, double-blind, placebo-controlled, double-dummy	91 clinical centers (USA n=26; Europe n=65)	Double-blind, double-dummy	Computer-generated randomization (SAS 9.4), 1:1:1	Centralized IWRS; identical placebo and active drug; fully concealed from investigators, subjects, sponsor ops team	Yes – full analysis set (FAS) used for primary endpoints	Missing pain entries handled via daily eDiary aggregation; early withdrawals analyzed per FAS; follow-up data interpreted with caution (small numbers)	Primary results at 3 months:• Dysmenorrhea responders: 72.9% (200 mg+ABT) vs 44.0% (75 mg) vs 23.5% (placebo) (all p<0.001 vs placebo except 75 mg NMPP).• Non-menstrual pain responders: 47.3% (200 mg+ABT, p=0.007) vs 30.9% placebo.At 6 months: Both doses significantly improved dysmenorrhea & NMPP; large reductions in overall pelvic pain; significant EHP-30 improvements.Analgesic-free at 6 months:…	24	64.9	Some concerns
157	2017	Not reported	USA	GDM	High-income	NIH NIDDK grant DK075867-02	65	3-arm randomized controlled trial	Single-center research clinic + community exercise site	None (open-label)	Variable-size permuted blocks, 1:1:1 allocation	Sealed opaque envelopes	No (per-protocol; 41/65 analyzed)	Mean replacement for <5% missing; excluded if >5% missing	F2F ↑ exercise mins & steps (η² .15–.23); ↑ motivational determinants (η² .11–.18); lower postprandial glucose at 36 wks vs control (p=.03); insulin started later (33 wks vs 27–31)	26	70.3	High risk
158	2017	ISRCTN6268558	United Kingdom (Northern Ireland & England)	GDM	High-income	BRIDGES Grant from International Diabetes Federation (educational grant from Lilly Diabetes)	150	Parallel, multicentre, randomised controlled trial	Multicentre (three UK hospitals: Belfast, Manchester, Dundonald)	Non-blinded (researcher aware; self-completed outcomes)	Computer-generated randomisation with variable block sizes; stratified by ethnicity, centre, parity	Yes – allocation by independent research support centre	Yes – intention-to-treat analysis	Participants lost to follow-up included in ITT; imputation not specified	Significant reduction in anxiety scores at 2 weeks; no difference in glycaemic outcomes	31	83.8	Some concerns
159	2016	not reported	Slovakia	PCOS	High-income	not reported	39	Randomized controlled trial, preliminary study	University hospital (First Department of Internal Medicine, P. J. Šafarik University, Košice)	Open-label (no blinding reported)	Random number table	not reported	not reported	not reported	Significant TST decrease in VIT D+MET group; borderline decrease in MET group No significant changes in fTST, DHEAS, FAI Significant Δ LH/FSH ratio between groups (p=0.023) Menstrual cycle improvement: VIT D 78%, VIT D+MET 80%, MET 90% Acne/hirsutism: no significant change Pregnancy rate: higher in MET group (67%) but not significant	19	51.4	Some concerns
160	2011	None reported	USA	Endometriosis	High-income	NIH grants R01HD044870, UL1RR024160	47	Prospective randomized double-blind controlled trial	Two academic medical centers (Rochester NY, Boston MA)	Double-blind (participants, clinicians, assessors); both oral and injectable treatments masked	Randomized; method not fully detailed; capsules/injections matched	Yes—identical-appearing injections & capsules	No ITT; per-protocol with mixed-model use of all available data	Missingness handled by mixed models; no imputation	Significant decline in B&B & NRS in both groups at nearly all time points; no significant difference between leuprolide vs OCs (treatment effect p>0.1); BDI improved in both; ISS trends non-significant	25	67.6	High risk
161	2006	Not reported	Poland	PCOS	High-income	NIH grant R01 HD40207; simvastatin donated by Polfa; OCP donated by Organon Polska	48	Prospective randomized controlled trial	Academic medical center (Poznan University)	No blinding (open-label; drugs distinguishable)	Block randomization in sealed envelopes (open-label randomization)	Sealed envelopes; not explicitly concealed beyond that	Yes—since no dropouts; ITT = per-protocol	No missing data—100% completion	Testosterone ↓: −41% with simvastatin vs −14% with OCP alone (p=0.006). LH ↓: −43% vs −9%. LH/FSH ↓: −44% vs −12%. Lipids: TC −10%, LDL −24% with statin; TC +8%, TG +21% with OCP alone. Hirsutism: mild ↓ (0.25 points, p=0.03).	24	64.9	High risk
162	2023	ClinicalTrials.gov NCT01889199	USA	PCOS	High-income	NIH (NICHD P50HD071836; NIH CTSI UL1TR001881); Santa Monica Bay Woman’s Club	12	Randomized, double-blind, placebo-controlled clinical trial	Academic medical center (UCLA)	Double-blind (participants and investigators)	Computer-generated block randomization (block size = 4), pharmacist-controlled	Yes – allocation by independent pharmacist	Not explicitly stated	Complete-case analysis; 1 dropout due to COVID-19	Android fat (%): flutamide −0.3±0.5 vs placebo +0.4±0.4 (p=0.040). Log LDL: −0.1±0.1 vs 0.0±0.0 (p=0.034). Log non-HDL: −0.1±0.1 vs 0.0±0.0 (trend, p=0.056). Fasting glucose: +4.6±1.6 mg/dL vs −0.3±3.9 (p=0.024). Adipocyte lipid accumulation: −1.8±0.6 vs −0.6±0.4 (p=0.004). Baseline PCOS vs controls: adipocyte lipid content 2529.9±1293.9 vs 932.6±661.8 (p=0.002).	22	59.5	Some concerns
163	2018	not reported	Iran	PCOS	Upper-middle-income	Yazd Research and Clinical Center for Infertility, Shahid Sadoughi University of Medical Sciences (grant 3906)	88	Randomized clinical trial	Single centre (Yazd Research and Clinical Center for Infertility)	Blinded outcome assessment for oocyte retrieval	Random Digit Software	not reported	not reported	not reported	Chemical pregnancy rate significantly higher in pretreatment group (41% vs 13%, p=0.035); clinical pregnancy rate higher (32% vs 9%, p=0.05); OHSS lower in pretreatment group; other outcomes non-significant	21	56.8	Some concerns
164	2019	IRCT20110509006420N18	Iran	PCOS	Upper-middle-income	Research & Clinical Center for Infertility, Yazd	120	Randomized controlled trial	Single infertility centre	Open-label	Sealed envelope randomization	Sealed opaque envelopes	No explicit ITT; complete-case	2 lost to follow-up; others complete	MII oocytes lower in PPOS (12.5 vs 16.0; p=.019); 2PN lower (p=.032); maturity lower (p=.035). Mild–moderate OHSS lower (36.5% vs 68.3%; p=.001). Chemical pregnancy 31.7% vs 47% (NS). Clinical pregnancy 14.6% vs 29.4% (NS).	23	62.2	Some concerns
165	2025	NR	Germany	Endometriosis	High-income	NR	60	Randomized cohort study with parallel comparison of paper-based vs online interrogation modalities.	Single academic tertiary referral center.	Double-blind randomization at allocation stage; no blinding during intervention due to modality differences.	Two-stage randomization: first to conservative vs surgical therapy arm; second block randomization using sealed opaque envelopes to paper-based vs online-based EHP-30 modality.	Yes — blank sealed envelopes; allocation unknown to patients and practitioners at selection.	NR	No imputation; substantial loss to follow-up acknowledged, particularly at 12 months.	>80% of patients favored routine ePRO use. Online modality rated more suitable, less complex, and less laborious than paper-based. Completion time >10 min significantly correlated with poorer coping, clarity, and higher effort (r≈0.53–0.59; p≤0.03).	19	51.4	High risk
166	2022	NCT05233514	Egypt & Saudi Arabia (collaborating institutions)	PCOS	Mixed Income	Princess Nourah Bint Abdulrahman University Researchers Supporting Project PNURSP2022R145	40	Randomized controlled trial (parallel)	Single outpatient gynecology clinic (Kasr Al-Aini University Hospital, Egypt)	Assessor-blinded only (participants not blinded)	Computer-generated random table	Not explicitly described; likely sealed envelopes but not stated	No	Per-protocol; all randomized completed (no missing data)	Significant reductions in IL-6, TNF-α, CRP in both groups; larger reductions in AE+M group: IL-6 (p=0.001), TNF-α (p=0.001), CRP (p=0.001); between-group post-treatment difference significant for all markers (p=0.01–0.001)	22	59.5	High risk
167	2024	PACTR202211578683612	Egypt	PCOS	Lower-middle-income	None	52	Parallel two-arm RCT	Single university hospital outpatient clinic	Participants unblinded; outcome assessors not reported as blinded	Online randomization tool (randomizer.org)	Sealed opaque numbered envelopes; allocation by non-clinical investigator	No ITT	No imputation; complete-case analysis; no attrition	HOMA-IR ↓22.7% vs 4.8% (p=0.007); insulin ↓19.6% vs 6.8% (p=0.012); FBG ↓10.6% vs 5.9% (p=0.016); BMI ↓5.6% vs 1.3%	24	64.9	High risk
168	2016	Not reported	Egypt	PCOS	Lower-middle-income	None reported	200	Parallel RCT	Single IVF hospital unit	Unblinded to participants/providers; outcome assessors not described as blinded	Computer-generated random table	Not described	No ITT (per-protocol across cycles)	20 women excluded before randomisation; post-randomisation attrition across cycles; complete-case only	Endometrium thicker in letrozole group (10.1 vs 8.2 mm, P=0.01); Progesterone higher (19.3 vs 15.3 ng/mL, P<0.01); CPR per cycle higher (14.8% vs 10.4%, P<0.01); No OHSS	19	51.4	High risk
169	2016	NCT01909141	Egypt	PCOS	Lower-middle-income	Not reported	100	Double-blind RCT	Single university teaching hospital	Double-blind (participants, staff, analysts)	Computer-generated table (block size 4)	Opaque sealed envelopes prepared off-site	Yes (stated)	None missing; all 100 completed	Ovulation cumulative: 92.3% vs 86.9% (NS); Pregnancy cumulative: 20.5% vs 26.2% (NS); Endometrium significantly thicker in letrozole group in cycles 2–3	26	70.3	Low risk
170	2017	NCT02022007	USA	PCOS	High-income	AstraZeneca Pharmaceuticals (investigator-initiated grant)	38	Single-blind RCT (investigator blinded)	Single centre (Woman’s Hospital Outpatient Metabolic Clinic, Louisiana)	Single-blind (investigator blinded; participants unblinded via pill characteristics but bag-masked)	Computer-generated block randomization	Concealment by pharmacy-prepared color-coded medication bags	No (per-protocol analysis of 34/38)	No imputation; only complete data analyzed	IS-SI: MET 208→SAXA 359→SAXA-MET 532 (SAXA-MET > MET p=0.02); NGT achieved in 91% SAXA-MET vs 55% SAXA vs 25% MET; TRG/HDL ratio significantly reduced in SAXA-MET & SAXA; menstrual interval improved most in SAXA-MET	24	64.9	Some concerns
171	2020	NCT02338193	USA	GDM	High-income	AstraZeneca Pharmaceuticals (investigator-initiated grant)	66	Randomized controlled trial	Single-centre (Women’s Hospital Metabolic Clinic, Louisiana)	Single-blind (investigator/clinical staff blinded; participants unblinded)	Computer-generated block randomisation	Colour-coded bag dispensing; investigator blinded to group	No explicit ITT; completer analysis used	Dropouts replaced; completer-only analysis; no imputation	DAPA-MET: −4.9% weight; WC −4.2%; improved HDL; reduced TG; improved glucose excursion; improved early insulin response. DAPA alone improved weight and metabolic parameters vs MET.	29	78.4	High risk
172	2022	NCT03480022	USA	PCOS	High-income	Novo Nordisk (investigator-initiated grant)	82	Randomized, double-blind, placebo-controlled phase 3 RCT	Hospital-based endocrine & metabolic center	Double-blind (participants, investigators, outcomes assessors)	Block randomization 2:1 (computer generated)	Identical prefilled pens; independent unblinded assistant managed drug dispensing	Per-protocol primary; multiple imputation for ITT sensitivity	Multiple imputation; 18% dropout	% weight loss: −5.7% vs −1.4% (p=.002); ≥5% weight loss: 57% vs 22% (p=.009); FAI significantly reduced (p=.006); menses/yr ↑ from 4.5→8.65 vs no change (p=.0001); WC, WHR, DXA fat% all significantly ↓	30	81.1	Some concerns
173	2015	Not reported	Egypt	PCOS	Lower-middle-income	Not reported	119	Randomized controlled trial	Alexandria IVF/ICSI Centre	Unblinded	Computer-generated random-number tables	None reported	Yes (explicit ITT)	Dropouts retained in analysis; no imputation	Cycle regularity: 92.5% (metformin), 100% (COC), 0% (control); Hirsutism improved 25% vs 40%; Weight: metformin ↓87→72 kg; COC ↑84→91 kg; Fasting insulin ↓18.6→10 vs ↑15→19; GIR improved in metformin (4.1→4.6), worsened with COC (4.4→3.1)	27	73	High risk
174	2021	NCT04256200	Lebanon	Endometriosis	Upper-middle-income	American University of Beirut Medical Practice Plan	70	Randomized controlled trial (double-blind)	Single-centre (AUBMC)	Double-blind (participants + investigators)	Computer-generated permuted block randomization (block size 6)	Numbered opaque containers; sealed opaque envelopes	Modified ITT performed	Last observation carried forward (LOCF) for missing efficacy data	VAS ↓6.0 dianogest vs ↓4.54 COC (both p<0.0001; between-group p=0.111). B&B severity decreased similarly. HRQoL improved significantly in both groups with no between-group differences.	28	75.7	Some concerns
175	2025	IRCT20171209037794N4	Iran	Endometriosis	Upper-middle-income	Vice-Chancellor for Research & Technology, Babol University of Medical Sciences (Grant 724134790)	80	Triple-blind, parallel-group randomized placebo-controlled RCT	Single infertility referral center (Fatemezahra Infertility Center, Babol University)	Triple-blind (participants, clinicians, pharmacists/statisticians)	Permuted block randomization (block size 4) generated via randomization.com	Password-protected allocation accessible only to independent investigator; identical placebo provided by pharmacist	Yes – ITT based on all randomized with at least one follow-up	3 dropouts included in ITT; missing handled by ANCOVA adjustment; no imputation described	Primary: Overall PSQI improved −1.7 vs placebo (95% CI −2.63 to −0.77), p<0.001, η²=0.20, d=1.0.Domains: Large reduction in sleep disturbances (−2.22, p<0.001); improved latency; medium increase in sleep duration.Pelvic pain: −1.56 vs placebo (p<0.001), η²=0.18, d=0.93.Clinical significance thresholds not met despite statistical significance.	31	83.8	Some concerns
176	2011	NCT00682890	United States	PCOS	High-income	NIH grants R03HD047298, K23HD049454, K24HD40237; Clinical Research Center Grant M01-RR00065	23	Randomized double-blind placebo-controlled trial	Single academic medical center	Double-blind (participants and investigators)	Computer-generated randomization with block sizes 3–4	Yes – pharmacy-controlled concealment	Not explicitly stated	Complete-case analysis; dropouts described; no imputation	Flow-mediated dilation increased by 69% in Met-OC group vs no change in OC (p=0.01); no significant between-group differences in insulin sensitivity or lipids; free testosterone ↓ and SHBG ↑ only with Met-OC	25	67.6	Some concerns
177	2024	ChiCTR2300077709	China	PCOS	Upper-middle-income	Hubei Provincial Natural Science Foundation of China	230	Pragmatic, randomized, parallel-controlled clinical trial	3 centres	Open-label pragmatic design; clinical outcomes assessed	Not explicitly described	Not explicitly described	not mentioned	not mentioned	Clinical pregnancy per OI cycle (30.99% vs. 23.30%); cumulative clinical pregnancy per patient (77.88% vs. 58.04%); improved ovulation and embryo quality; reduced oxidative stress; improved antioxidant enzyme activity	29	78.4	High risk
178	2020	IRCT20111219008459N13	Iran	Endometriosis	Upper-middle-income	Tabriz University of Medical Sciences (Grant 61669)	76	Parallel-group RCT	Single tertiary center (Al-Zahra Teaching & Treatment Center, Tabriz)	Single-blind (outcome assessor blinded)	Stratified block randomization (block sizes 4 & 6)	Sequentially numbered opaque sealed envelopes	Yes—analysis based on ITT	All participants analyzed; no imputation reported	State anxiety ↓ (MD −12.0, 95%CI −14.4 to −9.6, p<0.001); Trait anxiety ↓ (MD −10.9, 95%CI −12.7 to −9.1, p<0.001); Depression NS (p=0.565); QoL physical ↑17.2 (p<0.001); QoL mental ↑12.0 (p<0.001)	27	73	High risk
179	2017	IRCT2014081018662N1	Iran	PCOS	Upper-middle-income	Avicenna Research Institute (ACECR)	105	Double-blind RCT	Single centre	Double-blind (participants, investigators, assessors)	Block randomisation (size 4)	Yes	No	NR	Means, SDs, percentages, p-values	26	70.3	Some concerns
180	2022	Not registered	Spain	GDM	High-income	No external grant declared	260	Parallel randomized controlled trial	Single-centre (Hospital Clínico Universitario Virgen de la Arrixaca)	Partial blinding: endocrinologists unblinded; obstetricians, midwives, neonatologists blinded	Computer-generated random table	Not stated	No (complete-case analysis)	Complete-case only; excluded births outside centre	Insulin treatment: 24% MC vs 12.4% FC (p=0.018); Neonatal hypoglycemia: 7.2% MC vs 1.7% FC (p=0.035); LGA: 8.8% vs 8.3% (NS); Macrosomia: 6.4% vs 2.5% (NS); No differences in cesarean, preeclampsia, or other neonatal complications	28	75.7	Some concerns
181	2011	NCT00460018	USA	GDM	High-income	NIH NIDDK R18-DK067334; Kaiser Garfield Foundation	197	Randomized controlled trial	Single centre (Kaiser Permanente Northern California)	Non-blinded participants; outcome assessors blinded	Computer-generated randomization; balanced on age, parity, pregravid BMI	Not explicitly described	Yes (explicit ITT analysis used)	Sensitivity analysis categorizing missing as not meeting goal	Intervention group more likely to reach postpartum weight goal (37.5% vs 21.4%); reduced dietary fat (−3.55%); ↑ breastfeeding (+15%); no PA difference	29	78.4	Some concerns
182	2014	ClinicalTrials.gov NCT01344278	United States	GDM	High-income	Agency for Healthcare Research and Quality (AHRQ R01 HS019367); NIH (P30 DK092924)	2320	Pragmatic cluster RCT	Multicentre (44 medical facilities, Kaiser Permanente Northern California)	Investigators, data collectors, and providers blinded	Blocked randomisation by facility size (small/medium/large); restricted to maintain racial/ethnic balance	Yes – central allocation at non-study office	Yes – intention-to-treat	Complete-case analysis; ~70% with weight data at 12 mo	Expected: 0.06–0.1 detectable difference in postpartum goal attainment; pragmatic outcomes pending at time of publication	31	83.8	Some concerns
183	2016	NCT01344278	USA	GDM	High-income	AHRQ R01-HS-019367; NIDDK R18-DK-067334; additional NIDDK support	2280	Cluster randomized controlled trial	44 medical facilities (integrated health system)	Health-system mailed guidance vs. mailed + DPP-based telephone coaching (13 sessions)	Restricted block randomization stratified by facility size	Investigators, providers, assessors blinded	Multiple imputations (FCS); self-report substitutions; clinic-EHR weights used	OR 1.28 (95% CI 1.10–1.47) for meeting weight goals; −0.64 kg less weight retained at 6 months; +15.4 min/week vigorous activity	Yes (BMI category; race–ethnicity)	34	91.9	Low risk
184	2011	NR	Italy	Endometriosis	High-income	NR	35	Prospective, randomized, open-label, parallel-group controlled trial.	Single academic center	None (open-label due to different administration routes).	Computer-generated randomization list prepared by independent statistician; 1:1 allocation using sequentially numbered sealed opaque envelopes.	Yes — sealed opaque envelope method.	Partial. All randomized included initially; high discontinuation in Group T reduced evaluable numbers at 6 months.	Analyses based on available cases at each time point; no imputation performed.	Pain: Significant reduction in nonmenstrual pelvic pain and deep dyspareunia in both groups at 3 and 6 months; no significant between-group difference. Satisfaction: Satisfied/very satisfied: 64.7% Group N vs 22.2% Group T (p=0.028). Nodule volume: Reduction in both groups; greater reduction with triptorelin (16.1% vs 10.2%, p=0.048). Adverse effects: ≥1 AE in 77.8% Group T vs 35.3% Group N (p=0.…	23	62.2	High risk
185	2018	Not reported	Turkey	GDM	Upper-middle-income	None declared	60	Randomised controlled trial	Single-centre (Istanbul University)	Unblinded	Manual randomisation: participants drew paper labelled “experimental” or “control”	Not described	Not stated explicitly as ITT	Not described; attrition minimal (3 excluded after randomisation due to insulin initiation)	Significant ↑ in PAI; significant ↓ in DASS depression, anxiety, and stress in intervention vs control (p<0.001)	21	56.8	High risk
186	2005	not reported	USA	PCOS	High-income	Grant from the Chief Scientist Office of the Scottish Executive (CZG/4/1/47)	82	Prospective treatment with randomization to two metformin doses	single centre	None for treatment dose (patients were aware of dose)	Block randomization (computer-generated random numbers, n=4 per block)	Patient treatment codes held by a third party until after consent and allocation	not specified	not reported	MIS significantly reduced after 8 months (delayed effect, P=0.0005); no change in first 4 months Androstenedione reduced rapidly within first 4 months Menstrual frequency increased from 5.6 ± 0.5 to 8.3 ± 0.5 cycles/year (P<0.0001) BMI decreased by 4.3% over 8 months Leptin decreased significantly DHEAS increased early (first 4 months), no change in total T Ovarian volume unchanged; total follicl…	17	45.9	High risk
187	2023	NCT03572075	Italy	Endometriosis	High-income	not funded	30	Randomized controlled trial (three-arm parallel design)	Tertiary referral center	Outcome assessors blinded; physiotherapist not blinded	Computer-generated randomization	Opaque sealed envelopes	Yes, ITT by original assignment	Four women lost to follow-up; missing data not imputed	No significant differences between experimental and control groups in urinary, bowel, or sexual function; trend toward improvement in RED constipation in experimental group, not statistically significant	26	70.3	Some concerns
188	2021	EudraCT 2014-004409-34	Austria, Belgium, Georgia, Germany, Netherlands	PCOS	High-income	Sponsored by OGEDA SA (subsidiary of Astellas Pharma Inc.)	73	Phase 2a randomized double-blind placebo-controlled trial	Multicenter academic and hospital-based clinics	Double-blind (participants and investigators)	Computer-generated randomization (1:1:1)	Yes – centralized allocation	Yes – ITT population defined	Available-case analysis; no imputation reported	Total testosterone reduced vs placebo: −0.39 nmol/L (60 mg, P<0.05) and −0.80 nmol/L (180 mg, P<0.001); LH and LH/FSH ratio significantly reduced dose-dependently; no improvement in menstrual regularity or PCOSQ	30	81.1	Some concerns
189	2018	NCT02073929	Denmark	PCOS	High-income	Herlev Gentofte Hospital Research Foundation; Department of Internal Medicine; unrestricted grant + study medication from Novo Nordisk	72	Double-blind placebo-controlled RCT	Single university hospital (Herlev Gentofte Hospital)	Double-blind (participants, clinicians, assessors)	2:1 randomization; method not specified beyond “randomized”	Yes—identical injections prepared by pharmacy; sealed	Yes—ITT used for main analyses	7 dropouts; MR analyses done on available cases only	Weight −5.2 kg (−5.6%); liver fat −44% (P<.001); VAT −18.6% (P=.006); NAFLD ↓ from 25%→8%; FPG −0.24 mmol/L; SHBG ↑19%	29	78.4	Some concerns
190	2010	Not reported	Italy	PCOS	High-income	Not reported	48	Randomized, open-label, parallel-group RCT	Academic outpatient reproductive endocrinology clinic	Open-label	Random-number table; allocation decided by third party before recruitment	Not reported	Not explicitly stated	One dropout (GI side effects); complete-case analysis	AUC insulin: DRP/EE ↓ from 5,490±3,057 to ~4,500 µU·min/mL (p<0.05); DRP/EE+metformin ↓ from 5,446±3,468 to ~4,600 (p<0.05); DRP/EE+CPA ↑ from 4,877±2,277 to ~6,800 (p<0.01). HOMA-IR: DRP/EE 1.9→1.7 (NS); DRP/EE+metformin 1.8→1.6 (NS); DRP/EE+CPA 1.4→2.1 (p<0.005). G/I ratio: DRP/EE 8.6→11.2 (p<0.01); DRP/EE+CPA 12.1→8.7 (p<0.005). Lipids: DRP/EE no change; DRP/EE+metformin HDL ↑ 51.8→55.4 mg/dL …	22	59.5	High risk
191	2025	not reported	Norway	Endometriosis	High-income	Norwegian Fund for Post-Graduate Training in Physiotherapy (Grant 139512)	81	Randomised controlled trial	Akershus University Hospital	Blinded assessors for PFM assessment	not reported	Concealed allocation	Yes	not reported	Main estimates presented as mean difference with 95% CI; wide confidence intervals noted	33	89.2	High risk
192	2025	NCT05091268	Norway	Endometriosis	High-income	Norwegian Fund for Post-Graduate Training in Physiotherapy	81	Parallel-group RCT	Two university hospitals + community training sites	Blinded assessors for PFM outcomes; participants & trainers unblinded	Web-based block randomisation (blocks of 2 & 4) via blockrand in R	Independent researcher concealed allocation	Yes — all randomized participants included in primary ITT analysis	Missing outcomes reported; no imputation; some follow-up attrition	Worst pain: no effect (MD −0.5, 95% CI −1.5 to 0.5 at 4 mo; MD 0.0 at 12 mo). Current pain: improved (MD −1.1, 95% CI −2.1 to −0.2 at 4 mo; MD −1.5 at 12 mo). Other outcomes mostly trivial or uncertain.	34	91.9	High risk
193	2009	not reported	India	PCOS	Lower-middle-income	Council of Scientific and Industrial Research (CSIR), India	1387	Randomized, prospective, single-blinded clinical trial	Single tertiary infertility centre	Single-blinded (patients blinded; clinicians not blinded)	not reported	not specified	not reported	not reported	Ovulation: Letrozole 79.3%, CC+rFSH 56.95%, rFSH 89.89% Pregnancy: Letrozole 23.39%, CC+rFSH 14.35%, rFSH 17.92% Miscarriage: 13.8%, 16.67%, 14.52% respectively Cancellation: 20.7%, 43.05%, 10.11% respectively	19	51.4	High risk
194	2008	NR	China	PCOS	Upper-middle-income	NR	62	Prospective randomized controlled trial, parallel-group, cycle-level randomization.	Single centre	NR	NR	NR	NR	NR	Maturation at 48 h: 69.3% (A) vs 64.5% (B) vs 67.5% (C), NS. Fertilization: 70.1% vs 71.6% vs 79.6%, NS. Implantation: 15.6% vs 16.1% vs 18.0%, NS. Clinical pregnancy: 41.4% vs 43.3% vs 40.0%, NS. Live birth: 31.0% vs 33.3% vs 33.3%, NS.	21	56.8	Some concerns
195	2008	Not reported	Italy	PCOS	High-income	No external funding reported; study product supplied commercially	20	Randomized controlled trial (parallel, open-label)	University gynecological endocrinology clinic	Open-label	Random assignment (method not specified)	Not reported	Not stated	Complete-case analysis (no dropouts)	LH: 14.5±2.2 → 9.6±1.6 mIU/mL (p<0.005). Testosterone: 53.4±5.6 → 54.8±6.2 ng/100 mL (NS vs baseline; ↓ vs control p<0.05). Insulin: 12.4±2.2 → 6.5±1.1 mU/mL (p<0.005). HOMA: 2.8±0.6 → 1.4±0.3 (p<0.01). Glucose/insulin ratio: 9.9±1.8 → 17.4±2.9 (p<0.01). Insulin AUC (OGTT): significantly reduced (p<0.05). Menstrual cyclicity: restored in 100% of amenorrheic/oligomenorrheic MYO group vs 0% control…	18	48.6	High risk
196	2015	CTRI/2014/02/004418	India	GDM	Lower-middle-income	Local institutional funding (Christian Medical College); no external industry funding	159	Two-arm parallel RCT	Single tertiary hospital (Christian Medical College, Vellore)	Neonatologists and outcome assessors blinded; participants/providers unblinded	Computer-generated list with sequentially numbered opaque sealed envelopes	Yes – opaque sealed envelopes	Yes – ITT explicitly stated	Small missing data due to withdrawals; complete-case used but all randomized included in ITT	Composite neonatal outcome: 35% glibenclamide vs 18.9% metformin (P=0.02); Neonatal hypoglycaemia 12.5% vs 0% (P=0.001); Birthweight similar; maternal glycaemia similar	25	67.6	Some concerns
197	2010	not reported	Germany, Italy, Ukraine, Czech Republic, Denmark, Spain, Finland, France, Netherlands, Sweden	Endometriosis	High-income	Bayer Schering Pharma AG	281	Randomized, double-blind, placebo-controlled	Multi-center	Double-blind	not reorted	not reported	Yes (ITT included all randomized with available data)	Last observation carried forward for dropouts; no imputation for missing VAS	Mean VAS change –22.9 ± 22.7 mm; anchor-based MCID –7.8 mm; distribution-based MCID –8.6 mm	30	81.1	Some concerns
198	2023	IRCT20120718010324N51	Iran	PCOS	Upper-middle-income	Tabriz University of Medical Sciences	54	Superiority randomized controlled trial (parallel)	Primary health centers (community-based)	Triple-blind (participants, researchers, analysts)	Block randomization (1:1 ratio)	Yes – identical opaque bottles prepared by third party	Yes – explicitly stated	No missing data; complete follow-up; no imputation required	FBS significantly lower with curcumin vs placebo (MD −6.24 mg/dL; 95% CI −11.73 to −0.76; P=0.027); no between-group differences in insulin, lipids, testosterone or SHBG; amenorrhea/oligomenorrhea reduced in curcumin group (P=0.038)	27	73	Low risk
199	2011	Not reported	Iran	PCOS	Upper-middle-income	Research and Clinical Center for Infertility, Shahid Sadoughi University of Medical Sciences; Sabzevar University of Medical Sciences	80	Prospective randomized controlled trial (parallel; open-label)	Infertility and gynecology outpatient clinics	Open-label	Random number table	Not described	Not explicitly stated	Complete-case analysis; all participants completed follow-up	Ovulation rate: 30% metformin vs 15% orlistat (p=0.108); both groups had similar significant reductions in weight, BMI, and waist; orlistat reduced testosterone and lipids more; metformin reduced LH more	20	54.1	High risk
200	2018	IRCT2016081429362N1	Iran	PCOS	Upper-middle-income	National Nutrition and Food Technology Research Institute of Iran	60	Randomised controlled trial	Single-centre (Tehran University of Medical Sciences)	Double-blind	Stratified block randomisation based on BMI and age	Not explicitly described; identical placebo capsules used	Not explicitly stated	No imputation; attrition described (10/70 excluded before or during trial)	↑ IL-10 in probiotic vs placebo (p=.001); ↓ IL-6 and hs-CRP in both groups; modest weight & BMI reduction greater in probiotic group (Table 2–3)	26	70.3	Low risk
201	2013	NCT01212263	Egypt	PCOS	Lower-middle-income	not stated	174	Randomised controlled trial	Single private infertility centre in Egypt	none	"Computer-generated random numbers Simple random allocation Performed by independent statistician"	Sequentially numbered, opaque, sealed envelopes (SNOSE)	Yes – ovulation rate reported by intention-to-treat (ITT)	not specified	Ovulation rate: CC + uFSH: 72.4% uFSH alone: 34.2% p < 0.001 RR = 2.1; 95% CI = 1.5–2.9 Clinical pregnancy rate: Similar between groups (no significant difference) Live birth rate: Comparable FSH dose: Lower in CC+uFSH (532.5 ± 315 IU vs. 1057.5 ± 585 IU, p < 0.001) Stimulation duration: Shorter in CC group (12.34 ± 4.5 vs. 18.42 ± 6.2 days, p < 0.001) Follicles: Medium follicles fewer in CC grou…	27	73	Some concerns
202	2022	NCT03991286	Iran	PCOS	Upper-middle-income	Tehran University of Medical Sciences (Grant 98–01-30–41687)	42	Double-blind randomized placebo-controlled trial	Single fertility center (Shariati Hospital, Tehran)	Double-blind (participants & investigators); lab assessors blinded	Balanced block randomisation, block size 4	Yes—patients and investigators blinded; sequence generation and allocation done via block randomisation	No explicit ITT statement	No imputation reported; complete-case analysis (40 completed)	↑ Serum TAC & CAT; ↑ Nrf2, HO-1, NQ-1 expression; ↑ MII oocyte rate (p=0.029); ↑ high-quality embryos (p<0.001); no difference in pregnancy rates	29	78.4	Some concerns
203	2025	IRCT20150905023897N4	Iran	PCOS	Upper-middle-income	None (explicitly stated)	97	Phase II double-blind RCT	Gynecology clinics of Arash Hospital, Tehran	Double-blind	Simple computer-generated randomization using SAS 9.2; block randomization for pill distribution	Identical placebo containers; double-blind for participants, investigator, physician	No ITT mentioned; analyses on completers	No imputation; ANCOVA-adjusted post-values; attrition minimal	MetS markers: FBS −10.5%; TG −17.8%; LDL-C −14.2%; TC −12.6%; CRP −24.7% (all p<0.01). BP: SBP −5.2%, DBP −6.1% (p≤0.001). Anthropometrics: weight, BMI, WC, HC significantly ↓ (all p<0.02). Hormones: SHBG ↑18.3% (p=0.005); TT NS. QoL: all MPCOSQ domains ↑ (p<0.001). FSFI: within-group improved; between-group NS after adjustment.	31	83.8	Some concerns
204	2017	Not reported	Italy	PCOS	High-income	Not reported	246	Randomized controlled clinical trial (open-label)	University hospital surgical gynecology division	None (open surgical trial)	Computer-generated list; block size 4 (1:1)	Not described	Yes – ITT reported	7 participants refused follow-up labs; no imputation performed	AMH ↓ significantly in both groups: LOD 6.06→5.00 ng/mL (p<0.0001), THL 5.84→4.83 ng/mL (p<0.0001). No between-group differences (p=0.14–0.27). Pain VAS: LOD 3.26±1.1 vs THL 1.11±0.5 (p<0.0001). Procedure time: THL shorter (20±10 min vs 40±20 min, p<0.0001). LH and LH/FSH ↓ significantly within both groups.	24	64.9	High risk
205	2023	ClinicalTrials.gov NCT02890693	Switzerland	GDM	High-income	Swiss National Science Foundation (SNF 32003B_176119, PIs JP & AH); Novo Nordisk unrestricted grant	211	Monocentric, single-blind, parallel RCT	Single-centre (Lausanne University Hospital, CHUV)	Single-blind (assessors blinded; participants unblinded)	Computer-generated randomization (1:1)	Yes – independent central allocation	Yes – ITT and per-protocol	Complete-case analysis; <9% missing anthropometric data; no imputation	No sig. diff. in neonatal/adverse outcomes; prematurity lower (5% vs 12%, p=0.09); birth length −0.64 cm (p=0.05); no diff. in weight/BMI at 6–8 wks or 1 yr; sleep and behavior outcomes ns	30	81.1	Some concerns
206	2025	EudraCT 2016-001644-19; NCT02980276	Ireland (+ Mayo Clinic USA)	GDM	High-income	Health Research Board (Ireland)	535	Parallel superiority RCT (phase III) — economic evaluation of clinical trial	Multicentre (University Hospital Galway + affiliates)	Double-blind (participants, clinicians, analysts)	Computer-generated randomisation (1:1)	Central allocation; concealed	Yes (ITT)	Complete-case analysis; no imputation (MAR assumed)	Δ Cost € +193 (95 % CI –790 to 1176, p = 0.70); Δ QALY +0.002 (95 % CI –0.009 to 0.013, p = 0.77); Prob. CE 0.45 @ €45 k/QALY	34	91.9	Low risk
207	2022	SPIRIT 1: NCT03204318, EudraCT 2017–001588–19 SPIRIT 2: NCT03204331, EudraCT 2017–001632–19 SPIRIT EXTENSION: NCT03654274, EudraCT 2017-004066-10	Multinational (Africa, Australasia, Europe, North America, South America)	Endometriosis	Mixed Income	Myovant Sciences	1261	Phase 3, multicentre, randomised, double-blind, placebo-controlled	219 community and hospital research centres	Double-blind (patients, investigators, sponsor staff)	1:1:1 (placebo, relugolix combination therapy, delayed relugolix combination therapy)	Yes	Analyses were conducted in a modified intention-to-treat (mITT) population, defined as all randomized participants who received ≥1 dose of study drug.	Missing data for primary endpoints were handled using prespecified imputation rules for non-responders (e.g., participants who increased analgesic use classified as non-responders). Continuous outcomes likely used mixed-effects models accommodating missingness under missing at random assumption.	Dysmenorrhoea responder rates: SPIRIT 1: 75% vs 27%; SPIRIT 2: 75% vs 30% (relugolix combo vs placebo; p<0.0001) Non-menstrual pelvic pain responder rates: SPIRIT 1: 58% vs 40%; SPIRIT 2: 66% vs 43% (p<0.0001) BMD changes: Relugolix combo –0.70% (SPIRIT 1), –0.78% (SPIRIT 2); placebo ~0%; delayed combo –2.0% / –1.9%. Other: Significant reduction in opioid use in relugolix combination therapy vs p…	21	56.8	Low risk
208	2022	ACTRN12614000657628	New Zealand, UK, Brazil	PCOS	Mixed Income	University of Auckland; A+ Trust; Nurture Foundation; Maurice & Phyllis Paykel Trust	117	Parallel, sham-controlled RCT	Multicentre (6 fertility clinics in NZ, UK, Brazil)	Participants blinded; clinicians not blinded; outcome assessors blinded where applicable	Internet-based system; block randomisation (sizes 8 and 10), stratified by site	Centralised randomisation; allocation concealed until procedure	Yes – ITT used (all randomised retained)	For live birth: assumed no LB vs missing-at-random; bleeding: three missing-data assumptions	Live birth: 19% vs 24% (OR 0.76, 95% CI 0.30–1.92); pain significantly higher in scratch group (mean diff 3.2, 95% CI 2.5–3.9); bleeding higher in scratch group (OR 3.25, 95% CI 1.47–7.42)	32	86.5	Low risk
209	2006	NR	Denmark	PCOS	High-income	Multiple Danish research foundations (Fonden for Lægevidenskabelig forskning, Novo Nordisk Foundation, Danish Diabetes Association, etc.).	30	Randomized, double-blind, placebo-controlled, parallel-group clinical trial.	Single-centre interventional trial with external control cohort for baseline comparison.	Double-blind (participants and investigators).	Computer-generated randomization assigning participants 1:1 to pioglitazone or placebo.	Yes — identical tablets; allocation concealed until study completion.	NR	Incomplete 24-hour sampling or clamp data excluded from specific analyses; no imputation.	Insulin sensitivity: significantly increased with pioglitazone vs placebo (glucose infusion rate, Si). 24-h insulin: median insulin and AUC insulin significantly decreased with pioglitazone. Glucose metabolism: oxidative and non-oxidative glucose metabolism significantly improved. Lipid metabolism: decreased FFA levels; increased insulin-stimulated inhibition of lipid oxidation. LH secretion: no …	18	48.6	Some concerns
210	2009	NCT00145340	Denmark	PCOS	High-income	Multiple Danish foundations; Novo Nordisk Foundation; Danish Medical Research Council	30	Randomized placebo-controlled trial	Academic tertiary care medical centers	Double-blind	Computer-generated random numbers	Not described	Not explicitly stated	Available-case analysis; exclusions described; no imputation	Pioglitazone significantly increased insulin sensitivity, adiponectin, GH and IGF-I (p<0.05) and reduced alloTHF/THF ratio indicating decreased 5α-reductase activity; no change in serum or urinary cortisol levels	20	54.1	Some concerns
211	2020	ChiCTR1800019437	China	PCOS	Upper-middle-income	Sichuan Science & Technology Bureau; Chengdu Technology Innovation Project	109	Prospective randomized controlled trial	Single tertiary reproductive medicine center	Physicians conducting IVF procedures were blinded (Supplementary info). Participants not blinded → single-blind	Computer-generated random numbers	None reported; allocation not described beyond random numbers	No (complete-case only)	No imputation; 4 dropouts in GH group, 5 in control; all analyzed as per completed (n=50 each)	GH reduced follicular fluid TOS by −2.32 µmol/L and OSI by −3.25 vs controls (p<0.05). GH improved mitochondrial membrane potential (0.97±0.26 vs 0.23±0.19 in controls) and lowered early/late apoptosis (>50% reduction). More fertilized oocytes: 8.80±4.84 vs 6.46±4.61 (p<0.05). More cleaved embryos: 6.30±4.51 vs 4.32±3.08 (p<0.05). Implantation and clinical pregnancy rates higher but NS.	22	59.5	High risk
212	2020	Chinese Clinical Trial Registry. ChiCTR1800019437	China	PCOS	Upper-middle-income	Research and Development project of Science and Technology Bureau of Sichuan	93	Interventional (in vivo GH administration)	Reproductive Medicine Centre, hospital-based	not reported	not reported	not reported	Not reported	Not reported	GH reduced ROS by >50%, increased MMP, decreased early/late apoptosis rates; upregulated PI3K/Akt signaling; decreased FOXO1, Bax, caspase-9/3; increased Bcl-2; all changes significant vs. PCOS control (P<0.05); similar to non-PCOS controls (P>0.05)	28	75.7	Some concerns
213	2013	Not reported	USA	PCOS	High-income	NIH (R01HD054960, UL1RR025777, P30DK56336, P60DK079626)	30	Randomized controlled crossover trial	Single academic clinical research unit (UAB)	Open-label diet	Randomized assignment to diet order	Not reported	Not explicitly stated	Complete-case analysis; partial arm completion reported	Lower-CHO diet: fasting insulin −27% (p<0.001); fasting glucose −0.26 mmol/L (p<0.01); HOMA-IR 2.4→1.7 (p<0.001); insulin sensitivity index +22% (p<0.05); basal β-cell response (PhiB) 9.0→7.3 (p<0.001); dynamic β-cell response (PhiD) 426→522 (p<0.001); total testosterone −23% (2.24→1.69 nM, p<0.05); total cholesterol −0.53 mM (p<0.001); LDL-C −0.41 mM (p<0.01). STD diet: HDL-C ↓ (p<0.01); cholest…	19	51.4	Some concerns
214	2015	Not registered	Italy	Endometriosis	High-income	No special funding	78	Prospective multicenter randomized controlled trial	University hospital gynecology departments (3 centers)	Open-label	Computer-generated random sequence (SPSS Bernoulli distribution)	Not described	Not explicitly stated	No imputation; analysis on available cases	No significant difference in VAS between groups (p = 0.417); recurrence 10.8% vs 13.7% (p = 0.962); QoL improved similarly in both groups	23	62.2	High risk
215	2010	None reported	UK	PCOS	High-income	None stated	42	Double-blind RCT	Two district general hospitals (NHS Trust)	Researchers blinded; participants blinded (identical herbal teas)	Computer randomisation (equal allocation)	Yes – coded tea bags; researchers blinded	No ITT	1 withdrawal (disliked tea); otherwise complete-case	Significant ↓ free testosterone (p<0.05), ↓ total testosterone (p<0.05), ↑ LH & FSH (p<0.05); Subjective DQLI improved (p<0.05); FG score NS (p=0.12)	21	56.8	Some concerns
216	2021	ACTRN12617001476325	Australia	GDM	High-income	University of South Australia	121	Randomized non-inferiority RCT	Single-centre clinical trials facility	Open-label	Online random number generator; stratified by years since GDM and BMI	Not described	Yes (primary outcome only)	Last observation carried forward for primary outcome; complete-case for others	Weight loss 12mo: IER −4.8 ± 5.0 kg vs CER −3.2 ± 5.0 kg (p=0.2; non-inferior). HbA1c improved in both groups (time p<0.001). No between-group differences in glucose, insulin, HOMA-IR, OGTT. 49% attrition.	29	78.4	High risk
217	2022	Not reported	China	PCOS	Upper-middle-income	Beijing Municipal Administration of Hospitals’ Ascent Plan (DFL20181401)	66	Randomized controlled trial	Single tertiary gynecologic endocrine center	Open-label (no blinding)	Randomization after matching age & BMI; method not fully detailed	Not described	No	Complete-case analysis; no imputation reported	Lp(a): ↓ −44.1 mg/L vs −19.6 mg/L (p=0.02). CRP ↓ −2.42 mg/L (p=0.006) only with orlistat. LDL-C ↓ greater with orlistat (−0.63 vs −0.33 mmol/L). Weight ↓ −5.42 vs −2.55 kg (p=0.001). FT ↓ significantly more in combo group (p=0.03). TG ↑ in both groups; TC unchanged.	17	45.9	Some concerns
218	2016	ClinicalTrials.gov NCT01283854	Australia	GDM	High-income	National Health and Medical Research Council (NHMRC Grant 1003302); Women and Infants Research Foundation; Channel 7 Telethon	172	Parallel, two-arm randomised controlled trial	Single-centre (University of Western Australia, Perth)	Open-label (participants and supervisors); blinded lab analysts	Computer-generated, stratified by BMI (<30, 30–34.9, ≥35) and age (<35, ≥35)	Yes – custom randomization software; allocation independent of investigators	Yes – ITT approach stated	Complete-case analysis (n=169 for primary outcome)	GDM recurrence: 40% control vs 40.5% exercise (RR 1.01, 95% CI 0.70–1.46, p=0.95); improved fitness (Δ +13 W, p<0.01), reduced distress (DASS-21 score p=0.02); no obstetric/neonatal differences	26	70.3	Some concerns
219	2020	ChiCTR-OPC-17011930	China	PCOS	Upper-middle-income	National Natural Science Foundation of China; Wu Jieping Medical Foundation; Ministry of Science & Technology Industry Fund	111	Double-blind, three-arm RCT	Single tertiary hospital (Changhai Hospital, Shanghai)	Double-blind	Computer-generated random code	Identical tablet appearance; blinding of patients (investigator blinding implied)	No	Complete-case; no imputation; high dropout (31.5%) mainly due to unintended pregnancy	PM ↓ anxiety (2.31→1.65; p<0.001) & depression (2.08→1.61; p=0.010). ↓ NLRP3 mRNA (p=0.040), ↓ caspase-1 (p=0.004). ↓ IL-1β (p=0.02), IL-6 (p=0.02), TNF-α (p=0.04). ↓ TT significantly vs metformin (p=0.024).	20	54.1	High risk
220	2020	ChiCTR-OIN-16008529	China	Endometriosis	Upper-middle-income	National Key Research and Development Program of China; National Natural Science Foundation of China	450	Non-inferiority RCT (three-arm)	Single tertiary reproductive medicine center	Open-label (no participant/provider blinding described)	Random sequence via SPSS v16; independent statistician generated sequence	Opaque sealed envelopes, opened only after eligibility confirmed	Yes – ITT stated and analyses based on ITT population	5 excluded pre-randomization; protocol deviations minimal; complete-case approach for some embryo/FET analyses	Oocytes retrieved: 9.3 vs 8.0 vs 7.8 (P=0.021); mature oocytes: 7.8 vs 6.9 vs 6.5 (P=0.049). Clinical pregnancy per FET: 49.6% vs 53.9% vs 56.2% (NS). Implantation: 33.8% vs 34.2% vs 38.9% (NS). No OHSS in any group. LH profound suppression significantly higher with MPA (27.6% vs 13.0% vs 7.0%, P<0.001).	30	81.1	Some concerns
221	2021	ChiCTR1800015023	China	GDM	Upper-middle-income	China Medical Board (16-256); Hunan Young Elite Project S&T Dept (S2019RSRCHX0312)	320	Randomized controlled trial	Multisite (two counties in Hunan Province)	Outcome assessors blinded; participants & interventionists unblinded	Computerized randomization at town level by independent researcher	Not concealed (cluster allocation)	Yes, intention-to-treat with LOCF	LOCF used; missing values carried forward	Improvements in psychological QoL (β=0.479, p=0.002) & environmental QoL (β=0.462, p=0.001); near-significant HbA1c trend (β=−0.050, p=0.059)	24	64.9	Some concerns
222	2023	ChiCTR2100054797	China	GDM	Upper-middle-income	China Scholarship Council; Shaanxi Provincial R&D Fund	140	Parallel 1:1 RCT	Three tertiary hospitals in Xi’an	Assessor-blinded only; participants and interventionists unblinded	SPSS random number generator; simple randomisation	Sealed opaque envelopes	Not clearly stated	Not reported; attrition 22%	Significant group*time improvements in self-management (d≈0.9–1.0); lower gestational weight gain (11.7 vs 13.1 kg, p=0.008); lower infant birth weight (3.2 vs 3.4 kg, p=0.008)	26	70.3	High risk
223	2016	ClinicalTrials.gov NCT00868140	USA & Venezuela	PCOS	Mixed Income	NIH (R01HD035629; KL2TR000057); study drug supplied by Takeda Pharmaceuticals	32	Randomized, double-blind, placebo-controlled trial	Tertiary referral academic centers (VCU; Hospital de Clínicas Caracas)	Double-blind (participants and investigators)	Computer-generated randomization	Yes – identical matched placebo	Yes – analyzed as randomized	No missing data; complete-case analysis	Primary outcome: AUCDCI-IPG/AUCinsulin ratio ↑ from 2.01±0.24 → 3.60±0.47 in pioglitazone (+85%, p<0.0001); no change in placebo (1.85±0.17 → 2.07±0.28, NS); between-group p=0.0083. Matsuda index: 3.36±0.18 → 7.65±0.34 (Δ +4.29) vs placebo Δ +0.29; p<0.0001. AUC insulin: −3014.8±273.8 vs −1034.9±263.3 mIU·min/mL; p<0.001. Fasting insulin: −8.69 vs −0.24 mIU/mL; p<0.0002. Weight: +1.71 kg vs +0.11…	29	78.4	Some concerns
224	2025	NCT05476172	Türkiye	Endometriosis	Upper-middle-income	No external funding	70	Prospective randomized controlled trial	Single center (Bursa Uludag University)	Open-label (no blinding)	Simple randomisation (odd/even protocol number)	None reported	No (completer analyses)	Complete-case; high dropout	Both groups: VAS pain ↓ to near 0 by 12 months; chronic pelvic pain at 12 mo: NETA 1.06±2.43 vs dienogest 0.00±0.00 (p=0.06); Left ovarian endometrioma significantly smaller with NETA (1.08 vs 2.32 cm, p=0.04); Dropout at 6 mo higher with dienogest (47.5% vs 23.3%, p=0.026)	21	56.8	High risk
225	2022	NCT02563015	Canada	GDM	High-income	Canadian Institutes of Health Research; Canada Research Chair Program; Canada Foundation for Innovation	16	Double-blind randomized parallel RCT	Single hospital (Lakeshore Hospital, Montreal)	Double-blinded (parents & investigators)	Block randomization stratified by infant sex & skin type	Yes—coded supplement bottles; unique ID codes	No	Mixed models used available data; no imputation (n=2 missing @12m)	Higher 25(OH)D at 3 months with 1000 IU (P=0.026); both groups maintained >40 nmol/L	25	67.6	Some concerns
226	2010	NR	Austria	PCOS	High-income	Supported by the Medical University of Innsbruck, Austria.	29	Prospective randomized pilot trial, three parallel arms, open-label.	Single academic university hospital.	None (open-label; subjects and investigators not blinded).	NR	NR	No. Authors explicitly state no intention-to-treat analysis due to pilot nature.	Dropouts excluded from analysis; no imputation.	Androgens: Significant ↓FAI in all groups; ↓testosterone in metformin and naltrexone groups; ↓DHEAS only with naltrexone; ↑SHBG markedly with OC + Pr. Ovulation: Improved in all groups; greatest increase in metformin (6/8) and naltrexone (6/9) vs OC + Pr (3/8). Metabolic: No significant change in insulin sensitivity in any group; small ↓total cholesterol and BP only in metformin group.	18	48.6	High risk
227	2024	NCT04672720	Iran	PCOS	Upper-middle-income	No specific grant; conducted within Royan Institute (public research center)	110	Double-blind RCT	Single centre (Royan Institute)	Double-blind (patients and clinicians); identical placebo	Blocked randomization; code-based allocation	Yes – concealed via coded medication boxes	Not ITT; per-protocol (97/110 analyzed)	Losses reported; no imputation	No significant improvement in ovarian or pregnancy outcomes; significant weight and metabolic improvements in L-carnitine arm	27	73	Some concerns
228	2020	IRCT20120704010181N11	Iran	PCOS	Upper-middle-income	Ahvaz Jundishapur University of Medical Sciences (Grant NRC-9616)	48	Randomized controlled clinical trial (parallel, open-label)	Single tertiary hospital endocrinology clinic	Open-label	Table of random numbers	Yes – conducted by trained clinic staff	No	Complete-case analysis; participants consuming <90% flaxseed excluded	Significant reductions in insulin (−2.75 vs +1.52 μIU/mL), HOMA-IR (−0.72 vs +0.26), TG (−21.9 vs −0.3 mg/dL), hs-CRP, IL-6, leptin; ↑ HDL, QUICKI, adiponectin; menstrual regularity improved (81% vs 50%, p=0.037)	23	62.2	High risk
229	2018	IRCT201405181597N3	Iran	GDM	Upper-middle-income	Shahid Beheshti University of Medical Sciences (Iran)	64	Double-blind, placebo-controlled RCT	Single-centre (Al-Zahra University Hospital, Tabriz)	Double-blind (participants and investigators)	Block randomization (computer-generated), stratified by BMI and FBS	Yes – sealed opaque envelopes, labeled by independent coder	No	Complete follow-up; analysis on final 56 (87.5% retention)	↓ hs-CRP (p=0.019); ↓ TNF-α (p=0.009); IL-6 ↓ nonsignificant; improved MDA (p=0.002), GSHR (p=0.047), GPx (p=0.032); TAC, SOD nonsignificant	28	75.7	Some concerns
230	2020	IRCT2015090523897N1	Iran	GDM	Upper-middle-income	Tarbiat Modares University, Tehran, Iran	70	Randomised double-blind placebo-controlled trial	Single-centre (Arash Hospital, Tehran University of Medical Sciences)	Double-blind (participants, clinicians, and investigators)	Computer-generated randomisation (1:1)	Yes – sequentially numbered opaque sealed envelopes	No – per-protocol analysis	Excluded those who initiated insulin or dropped out; no imputation	↓ FBS (96.3→92.4 mg/dL, p=0.004), ↓ fasting insulin (11.6→10.0 µU/mL, p<0.001), ↓ HOMA-IR (2.76→2.28, p<0.001) in ginger vs placebo; BS2hpp unchanged (p>0.05)	20	54.1	Some concerns
231	2015	Not registered	Australia	GDM	High-income	University of Western Australia; Women & Infants Research Foundation; NHMRC (1003302)	40	Parallel randomized controlled trial	Single-centre (King Edward Memorial Hospital, Perth)	Open-label	Sequentially numbered opaque envelopes	Yes – sealed opaque envelopes	No (per-protocol)	One control participant excluded; complete-case analysis	Significant ↑ maternal fitness in exercise group (p=0.012 vs control); ↑ positive attitudes and intentions toward exercise (p<0.05); no differences in weight gain, BP, perceived mobility, obstetric or neonatal outcomes	19	51.4	Some concerns
232	2023	NCT05981742	Iraq	PCOS	Lower-middle-income	Not specifically funded; institutional support	75	Open-label, three-arm randomized clinical trial	Single centre (Maternity & Pediatrics Teaching Hospital, Al-Diwaniyah)	Open-label, no blinding	Computer-based randomization (Research Randomizer)	Not reported	Yes (all 75 completed)	No missing data	Combination group: ↓BMI p=0.001; ↓Testosterone p=0.008; ↓LH p=0.043; ↑FSH p=0.047; ↓PRL p<0.001; ↑dominant follicles p<0.001; ↓RI p<0.001. Metformin alone: ↓BMI p=0.038; ↑DF p=0.004; ↓RI p<0.001	22	59.5	High risk
233	2024	IRCT20160619028528N4	Iran	PCOS	Upper-middle-income	not reported	60	Parallel-group randomized controlled trial	single centre-Infertility clinic, Imam Khomeini Hospital, Sari, Iran	Blinded assessors; participants and instructors not blinded	Computer-generated random allocation with block sizes 4 and 6	Sequentially numbered opaque envelopes	Yes	One control participant withdrawn; one non-response at follow-up; analysis based on ITT	Significant increase in health-promoting behaviors in the intervention group immediately and at 2 months (P<0.001); effect size ES=1.5 (post-intervention), ES=1.3 (2 months); Quality of life improvements significant per GEE test	31	83.8	Some concerns
234	2023	ChiCTR2400090569	China	GDM	Upper-middle-income	Scientific Research Project of Hunan Provincial Health Commission (202104110803, 202104110613); Natural Science Foundation of Hunan Province (2023JJ60284); Hunan Provincial Science & Technology Plan (2019SK4008)	140	Prospective randomized controlled double-blind trial	Single-centre (Hunan Provincial Maternal & Child Health Care Hospital, Changsha)	Double-blind (participants, surgeons, and assessors blinded)	Computer-generated randomization (1:1) via SAS	Yes – sealed opaque envelopes; allocation by anesthetist before surgery	Yes	Complete data, no dropouts reported	↓ Sufentanil at 6h (p=0.049) and 24h (p<0.001); ↓ VAS pain scores (24h rest p=0.002; 24h activity p=0.001; 48h activity p=0.007); bowel function recovery faster (p=0.031); no diff. in lactation or neonatal NBNA scores	24	64.9	Low risk
235	2010	Not reported	Germany, Switzerland, Austria	PCOS	High-income	Not stated	75	Prospective randomized double-blind controlled trial	Multi-centre (Germany, Switzerland, Austria)	Double-blind (participants + investigators)	Computer-generated code	Sealed, consecutively numbered envelopes prepared by independent nurse	Yes—ITT reported (75 patients) but primary analyses also presented as per-protocol	Pregnant participants excluded from hormonal/metabolic analyses; others excluded after side effects for per-protocol; no imputation	Ovulation (ITT): 59% metformin vs 55% acarbose (NS). Regular cycles: 62% vs 68% (NS). Pregnancy: 8% vs 8%. Metformin: ↓BMI (31.6→30.6, p=0.000), ↓fasting insulin (19.5→14.3, p=0.013), ↑glucose/insulin ratio (p=0.028), ↓cholesterol (p=0.023). Acarbose: no significant metabolic changes. Side effects: flatulence/diarrhoea 76% metformin vs 39% acarbose (p=0.001).	29	78.4	Some concerns
236	2023	NCT02761382	Denmark	Endometriosis	High-income	TrygFonden; Ladywalk; Danish Endometriosis Patient Association	58	3-arm parallel RCT	Multicentre (3 outpatient endometriosis clinics)	Participants partially blinded to PI type; analysts blinded; therapists crossed	Computer-generated blocks of 6	Research assistant concealed IDs	Yes (stated and performed)	MLM inherently tolerates missing; no imputation except sensitivity tests (LOCF)	QoL improved (large effects, d up to 1.0); no significant pain reduction; improvements in dyschezia, constipation	32	86.5	Some concerns
237	2008	Not reported	Japan	Endometriosis	High-income	All authors received consulting fees from Nobelpharma Co., Ltd (manufacturer also prepared study medication)	100	Double-blind randomized placebo-controlled RCT (Phase III)	Multicentre (18 centres: 13 clinics, 5 hospitals)	Double-blind (participants + clinicians); identical blister packs	Permuted block method; blocks of 6 (3 OCP, 3 placebo) assigned to each centre	Central allocation concealment by manufacturer; code not broken until study end	ITT population defined as those taking ≥1 cycle; analyses presented mainly on efficacy set (96/100)	No imputation; dropouts described; complete-case analysis	Dysmenorrhea VRS reduction: OCP −2.0 vs placebo −0.6 (p<0.0001); VAS reduced significantly more in OCP group; Endometrioma volume reduced OCP: 14.7→7.6 mL (p<0.0001) vs placebo: 14.6→9.9 mL (p=0.0172)	27	73	Some concerns
238	2009	Not reported	Japan	Endometriosis	High-income	Mochida Pharmaceutical Co., Ltd.	271	Phase III randomized double-blind controlled trial	24 multicenter gynecology sites	Double-blind, double-dummy	Permuted block randomization by center	Yes – central allocation with concealed sequence	Yes – efficacy analysis set (treated + assessed)	Patients without post-treatment data excluded from efficacy set	Total nonmenstrual symptom score: DNG 5.7→2.5 (−3.2) vs BA 5.9→2.4 (−3.5); difference −0.39 (95% CI −1.11 to 0.32). VAS lower abdominal pain: −30.2±31.8 mm vs −27.3±33.8 mm (NS). VAS lumbago: −15.7±28.7 vs −17.3±24.8 (NS). Menstrual symptom total: 7.0→4.9 vs 7.0→4.6. Chocolate cyst volume reduction: 47.4±53.0% vs 46.1±50.6%. Lumbar spine BMD change: −1.0±2.3% vs −2.6±2.3% (p=0.003). Hot flushes: …	26	70.3	Some concerns
239	2017	NCT01697111	Japan	Endometriosis	High-income	Bayer Yakuhin, Ltd.; funder involved in trial design, analyses, writing	312	Phase 3 randomized, double-blind, placebo-controlled parallel-group trial with open-label extension	32 centers across Japan	Double-blind (FlexibleMIB vs placebo) for 24-week phase; open-label extension	Interactive Web Response System; stratified by baseline VAS (<60 vs ≥60 mm)	Placebo tablets identical in appearance; allocation concealed via IWRS	Full analysis set = all randomized receiving ≥1 dose; ITT used for primary comparison	Not detailed; appears complete-case with no imputation	LS mean difference in VAS: −26.3 mm (95% CI −31.6 to −20.9, p<0.0001) vs placebo; improvements in pelvic tenderness, uterine mobility, induration; endometrioma size reduced	33	89.2	Some concerns
240	2022	NCT03055955	Japan	Endometriosis	High-income	not mentioned	335	Phase 3, randomized, double-blind, double-dummy, active-controlled trial	42 centers in Japan	Double-blind (participants + outcome assessors)	1:1 allocation to REL vs LEU	Double-blind, double-dummy design	Yes, full analysis set same as randomized patients	not reported	Maximum VAS score change: REL 52.6 ± 1.3, LEU 57.5 ± 1.4; dysmenorrhea: REL 63.3 → 2.1, LEU 64.6 → 0.0; NMPP: REL 32.9 → 12.7, LEU 31.6 → 8.9; menstruation recovery median: REL 38 days, LEU 68 days	33	89.2	Low risk
241	2024	jRCT2011210027	Japan	Endometriosis	High-income	Fuji Pharma Co., Ltd.	162	Randomized, placebo-controlled, double-blind parallel-group RCT	25 hospital centres	Double-blind (participants, investigators, statisticians)	Interactive Web Response System; permuted-block design; stratified by baseline VAS and comorbidities	Independent, centralized system; allocation masked from investigators	Full analysis set used for efficacy; ITT-consistent	Multiple imputation used for sensitivity; otherwise FAS	VAS pain reduction −33.2 mm vs −22.2 mm; between-group LSMean difference −8.5 mm (95% CI −16.1 to −0.9, p=.028); Responder ≥30%: 53% vs 29.6%; ≥50%: 36.4% vs 12.3%; Endometrioma size ↓44.5%; CA-125 normalization 19% vs 2.4%	34	91.9	Low risk
242	2024	IRCT20211108053007N1	Iran	PCOS	Upper-middle-income	Student Research Committee + Research & Technology Chancellor, Shahid Beheshti University of Medical Sciences	56	Randomized controlled trial (triple-blind)	Obstetrics & gynecology clinic, Ayatollah Taleghani Hospital (Tehran)	Triple-blind (participants, investigators, analysts)	Block-stratified randomization based on BMI, menstrual-regulating drugs, and metformin	Sachets labeled A/B by manufacturer; identical appearance; concealed for participants, researchers, statistician	No ITT; completer analysis	Participants completing <90% supplement excluded	PCOSQ-26: Significant improvement in emotional (p=0.044), body hair (p=0.016), weight (p=0.033), infertility (p=0.027) domains vs placebo. SF-12: physical score improved (p=0.035). PSS-10: no significant change.	26	70.3	Some concerns
243	2020	ACTRN12619001207101 (prospectively registered)	Australia	GDM	High-income	Mercy Health Services Academic Research & Development Committee	69	Randomised controlled trial	Single metropolitan hospital	Participants and provider not blinded; assessor blinded for outcome scoring	Computer-generated randomisation by independent off-site person; randomised by class date	Allocation emailed day before class; women already booked → concealed adequately	Yes (stated ITT)	All available data used; 1 lost to follow-up; no imputation	Knowledge +12% (95% CI 10–15); self-efficacy +2.5 units (95% CI 1.9–3.0); both exceeded clinically important difference	25	67.6	Some concerns
244	2022	ClinicalTrials.gov NCT05273073	Malaysia	GDM	Upper-middle-income	Universiti Kebangsaan Malaysia & B-Crobes Laboratory Sdn. Bhd.	132	Randomized, double-blind, placebo-controlled trial	Single-centre (Universiti Kebangsaan Malaysia Medical Centre)	Double-blind (participants & investigators)	Computer-generated randomization (1:1)	Yes – sealed code labels “GDM-A/B”	No (Per-protocol analysis)	20% attrition; excluded non-compliers	↓ FBG −0.20 mmol/L (p=0.0021); ↓ HbA1c −0.39% (p<0.001); ↓ hs-CRP (−1.42 mg/L, p=0.002); ↓ TG, cholesterol (p<0.05); ↓ WC −1.93 cm (p<0.001); ↑ Bifidobacterium adolescentis; ↓ Bacteroides spp.	29	78.4	Some concerns
245	2017	NCT02304107	Egypt	PCOS	Lower-middle-income	Self-funded	140	Randomized controlled trial (parallel)	University hospitals (Cairo University & Beni-Suef University)	Open-label	Computer-generated random numbers	Yes – sequentially numbered opaque sealed envelopes	Yes – explicitly stated	Lost-to-follow-up considered anovulatory in ITT analysis	Cumulative pregnancy: 30% letrozole vs 34% uFSH (p=0.578); ovulation 47% vs 57% (p=0.236); no OHSS; uFSH cycles 4.8× more expensive	27	73	High risk
246	2016	ChiCTR-IOQ-14005715	China	Endometriosis	Upper-middle-income	NR	120	Prospective, randomized, controlled clinical trial.	Single tertiary university hospital IVF center.	Partial blinding: laboratory staff and embryo-transfer operators blinded; patients and research assistant not blinded.	Computer-generated randomization using SPSS; allocation implemented via sealed opaque envelopes.	Yes — sealed envelope system; allocation unknown to treating team at assignment.	Yes. All randomized patients analyzed; no losses to follow-up.	Not applicable (complete follow-up).	Clinical PR: 58.3% atosiban vs 38.3% control (p=0.044). IR: 41.0% vs 23.4% (p=0.004). Miscarriage rate: 8.6% vs 8.7% (NS). Uterine contractions: significantly higher in endometriosis vs tubal-factor group (2.5 vs 1.8 waves/min; p<0.01). Logistic regression: atosiban positively associated with pregnancy (OR 1.87); uterine contractions inversely associated (OR 0.58).	30	81.1	Some concerns
247	2022	Not stated	China	GDM	Upper-middle-income	Subject of Guangdong Provincial Bureau of Traditional Chinese Medicine (20152021)	170	Randomized controlled trial	Single centre (Guangdong Women and Children Hospital)	Open-label (no blinding)	Randomly divided (method not described)	Not described	Not reported	Not stated	Intervention improved weight, FPG, 2hPPG, compliance, satisfaction, disease awareness; reduced macrosomia, preterm birth, neonatal asphyxia	22	59.5	Some concerns
248	2025	ChiCTR2400090569	China	GDM	Upper-middle-income	Startup Fund for Scientific Research, Fujian Medical University (2022QH1119); Fujian Provincial Key Clinical Specialties Construction Project (HLZDZK202301)	72	Parallel randomized controlled trial	Single-centre (The Second Affiliated Hospital of Fujian Medical University, Quanzhou)	Single-blind (assessors blinded; participants unblinded)	Computer-generated random number table (1:1)	Yes – sealed opaque envelopes	No (per-protocol)	Complete follow-up (0% attrition)	PFMT adherence ↑ (14.7±2.6 vs 11.8±1.5, p<0.001); ICIQ-SF ↓ (5.3±0.6 vs 7.8±0.8, p<0.001); Self-efficacy ↑ (87.5±9.2 vs 65.1±6.9, p<0.001); KAP ↑ (66.4±6.7 vs 52.6±5.4, p<0.001); Muscle strength class I: 2.88 vs 1.10, p<0.001	23	62.2	Some concerns
249	2010	Not reported	Australia	Endometriosis	High-income	Australian Gynaecological Endoscopy Society Research Foundation; L.E.W. Carty Charitable Fund; Royal Women’s Hospital Foundation	178	Prospective randomized double-blind controlled trial	University teaching hospital endometriosis & pelvic pain clinic	Double-blind (participants and follow-up clinicians blinded)	Computer-generated random numbers	Sequentially numbered opaque sealed envelopes	Yes – explicitly stated	Subjects with missing baseline data excluded; ITT otherwise applied; loss to follow-up documented	Overall pain reduction at 12 months: Excision 2.9±3.4 vs Ablation 2.9±2.9, p=0.93. Pelvic pain: 2.6±3.5 vs 2.7±2.7, p=0.94. Dyspareunia: 3.1±4.1 vs 1.8±4.1, p=0.17. Rectal pain: 1.4±3.7 vs 0.5±2.7, p=0.22. Defecation pain: 1.8±3.5 vs 0.7±3.1, p=0.16. No significant differences across any pain domains.	31	83.8	Some concerns
250	2018	NCT01344278	USA	GDM	High-income	Agency for Healthcare Research and Quality; National Institute of Diabetes and Digestive and Kidney Diseases	2014	Cluster RCT	44 medical facilities	Investigators and clinicians blinded to facility assignment	Block randomisation stratified by facility size; restricted randomisation to balance race/ethnicity distributions	Not explicitly described	Intent-to-treat stated	Missing weights led to exclusions from analyses; not explicitly modelled	RRs with 95%CIs; absolute risk differences; mediation percentages	28	75.7	Some concerns
251	2019	NCT02086526	USA	PCOS	High-income	St. Jude Medical Foundation; NIH BIRCWH; NCATS	48	Parallel-group RCT (open-label)	Single centre (Mayo Clinic)	Open-label	Randomized 1:1 (metformin vs no-treatment delayed start)	Not reported	No (per-protocol only; delayed-start crossover design)	Minimal missing data; 6 dropouts described in flow diagram	No overall change in endothelial function vs control; BUT significant improvement in women with baseline dysfunction: 1.3±0.3 → 1.7±0.3 (P<.001); no change in normal function group; significant reductions in glucose, insulin, HOMA-IR, cholesterol, testosterone	24	64.9	High risk
252	2014	NCT01719029	USA	GDM	High-income	NIH (R21 DK 088324); NIH/NCTSI UL1 TR000154; Colorado NORC P30 DK 048520; University of Colorado DER Centre	16	Randomized crossover RCT	University hospital + Kaiser Permanente Colorado	CGMS glucose assessor blinded; participants not blinded	Biostatistician-prepared sequence; allocation concealed until assignment	Yes	No (crossover complete-case)	One subject excluded after hyperglycemia; complete-case only	CHOICE diet raised 24-h glucose AUC by ~6% (P=0.02) but remained within treatment targets; significantly ↓ postprandial FFA by 19% (P≤0.01)	21	56.8	Some concerns
253	2016	NCT01719029	United States	GDM	High-income	NIH (R21 DK088324); Colorado Clinical & Translational Science Institute; Colorado Nutrition & Obesity Research Center	12	Parallel, randomized controlled pilot trial	Single-centre (University of Colorado; Kaiser Permanente)	Open-label	Randomized at GDM diagnosis; method not explicitly stated	Not reported	No (per-protocol)	Complete-case; no imputation	CHOICE ↓ fasting glucose (p=0.03), ↓ FFAs (p=0.06), ↑ insulin suppression of lipolysis (56% vs 31%, p=0.005), ↓ adipose inflammatory markers (IL-1β, TNF-α, TLR-4, CD11B/C, CD1D, GPR43; all p<0.01); infant %fat lower (10.1% vs 12.6%)	27	73	Some concerns
254	2023	NCT02244814	USA	GDM	High-income	American Diabetes Association	59	Parallel RCT	Single	Partial (blinded investigators only)	Computer random number generator stratified by ethnicity (Hispanic vs non-Hispanic)	Yes	Yes	Multiple imputation for missing PEA POD data	Mean neonatal %fat 9.8 vs 10.0; no sig diff (p > 0.05); maternal HOMA-IR ns	29	78.4	Some concerns
255	2008	Not registered (pre-2007)	United States	PCOS	High-income	NIH Grants K23 HD043881, R03 HD41989; NCRR UL1 RR024160; Organon Pharmaceuticals supplied Desogen	79	Two parallel RCTs (single-treatment and combined-treatment trials)	Single-centre (University of Rochester Medical Center, NY)	Double-blind for metformin vs placebo; open-label for OC and lifestyle	Random number table; 1:1 assignment (metformin/placebo or lifestyle/OC arms)	Yes – allocation managed by independent investigational pharmacy	No – per-protocol	Dropouts excluded (13 total); no imputation	Lifestyle: ↓ FAI 59%, ↑ SHBG 122%; OC: ↓ total T 44%, ↓ FAI 86%, ↑ CRP 40%, ↑ total cholesterol 14%; Combination: ↓ T 55% vs placebo 33%, ↓ waist circumference 4%, ↑ HDL 46%; metformin + lifestyle ↓ visceral adiposity; no significant effect on weight loss	19	51.4	Some concerns
256	2023	ACTRN12615000282583	New Zealand	GDM	High-income	Health Research Council of New Zealand (HRC 14/449); JN Williams Memorial Trust; HB Williams Turanga Trust; Aotearoa Foundation	82	Nested cohort within stepped-wedge cluster RCT (TARGET Trial)	Multicentre (4 New Zealand hospitals)	Assay personnel blinded; clinicians unblinded	Cluster randomisation by hospital; timing-based stepped-wedge design	Yes – cluster allocation by pre-specified random sequence	Yes – ITT	Complete-case analysis	No group-level biomarker differences; compliant women with tight targets had ↓ leptin (−39%, p=0.002), ↓ cord C-peptide (−49%, p=0.01), ↓ cord leptin (−63%, p=0.06); ↑ CRP (+122%, p=0.01) and cholesterol (+98%, p=0.06) postpartum	32	86.5	Some concerns
257	2018	ISRCTN55443431	UK (Northern Ireland)	GDM	High-income	Public Health Agency, Northern Ireland	60	Cluster randomized controlled trial	Two joint diabetes–antenatal clinics	Not blinded (nature of intervention); outcome assessors not blinded	Cluster randomization by week of attendance; restricted random sequence	Not blinded; allocation revealed after arrival & consent	Yes – ITT stated	Missing data handled by including all participants with available outcomes; no imputation	Weight change: –3.9 ±7.0 kg vs +0.7 ±3.8 kg (P=0.02); BMI –1.4 vs +0.2 (P=0.03); WC –2.9 vs +1.7 cm (P=0.02); no glucose differences; bodily pain significantly reduced (P=0.007)	26	70.3	High risk
258	2012	ISRCTN41865643	Netherlands, UK, Belgium, Malta, Argentina, Colombia	PCOS	Mixed Income	Organon (unrestricted educational grant; no role in study design, analysis, reporting)	302	Prospective, multicentre, randomized controlled trial	10 fertility centres across Europe & South America	Open-label (no masking possible)	Computer-generated blocks of 20 per centre	Sealed opaque envelopes	Yes—both ITT and per-protocol performed	Dropouts censored using Kaplan–Meier; per-protocol excludes withdrawals; ITT used all randomized	Per-protocol: PR/woman 58% FSH vs 44% CC (P=0.03); LBR 52% vs 39% (P=0.04). PR/cycle 26.4% vs 17.4% (P=0.008). ITT: PR/cycle 23.3% vs 15.9% (P=0.016). Cumulative PR 52.1% vs 41.2% (P=0.021).	30	81.1	Some concerns
259	2012	NCT00778804	USA	GDM	High-income	NIH R21-DK-071694	80	Randomized controlled trial	Two-site hospital-based	Unblinded	Not stated; computerized randomization (equal allocation)	Not concealed	Yes	Complete-case analysis (those lost to follow-up excluded)	No significant differences in maternal glucose or BW; intervention ↑ transmission frequency; slight nonsignificant trends toward better neonatal outcomes	20	54.1	High risk
260	2019	NCT01767090; EudraCT 2012-002791-14	Belgium, Japan, multiple EU countries	Endometriosis	High-income	Sponsored by Astellas Pharma Inc.	540	Phase II multicenter randomized double-blind placebo-controlled trial	Multinational academic and hospital-based gynecology centers	Double-blind (ASP1707 vs placebo); leuprorelin open-label reference	Interactive Response System; 1:1:1:1:1:1 allocation; stratified by region/country	Yes – centralized electronic allocation	Yes – full analysis set defined	Dysmenorrhea scores imputed as 0 if amenorrheic; available-case otherwise	Significant dose-related reduction in overall pelvic pain (P=0.001), dysmenorrhea (P<0.001), and non-menstrual pelvic pain (P=0.029); greatest effect at 10–15 mg; BMD loss dose-dependent but less than leuprorelin	34	91.9	Low risk
261	2024	IRCT20200922048802N2	Iran	PCOS	Upper-middle-income	not reported	66	Randomized, double-blind, placebo-controlled trial	Single-centre (Emam Ali outpatient clinic, Yazd, Iran)	Double-blind (participants and study personnel)	Random number table	Capsules identical; participants blinded; placebo matched (corn starch)	Kolmogorov–Smirnov test; independent sample t-test; Mann–Whitney test; paired t-test; ANCOVA (adjusted for baseline + age + weight change + physical activity); SPSS v24	not reported	Excluded non-adherent participants (<70% pills); per-protocol approach	26	70.3	Some concerns
262	2021	ClinicalTrials.gov NCT01028989	USA	PCOS	High-income	NICHD, NCATS, NIDDK, UAB Obesity Training Grants	30	Randomized crossover trial	single centre- Clinical Research Unit (CRU) at the University of Alabama at Birmingham	Participants were blinded to diet order	Random assignment to diet order	not reported	not reported	Some fasting insulin and HOMA-IR excluded due to hemolysis Glucagon values exceeding physiological range excluded	"Baseline characteristics: mean ± SD Paired t-test for BMI Normality tested with Levene’s test, Shapiro–Wilk, Kolmogorov–Smirnov QQ-plots used Linear mixed models for diet, time, and diet × time interaction Log-transformation for non-normal hormones Covariance: compound symmetry Subject ID: repeated effect Tukey post hoc (unadjusted pairwise results emphasized due to small sample size) Outliers: …	22	59.5	Some concerns
263	2020	IRCT138902113840N1	Iran	GDM	Upper-middle-income	Shahid Sadoughi University of Medical Sciences (postgraduate dissertation funding)	50	Randomized controlled clinical trial	Single centre (Yazd Diabetes Research Centre)	Open-label (no blinding possible due to injectable form; no placebo)	Randomisation method not described (parallel allocation reported)	Not concealed; no placebo; groups aware	No ITT; completer-only	Dropouts excluded (5 total); no imputation	↑ Adiponectin within intervention group (+1.53 mg/dL, p=0.01); ↑ 25-OH vitamin D (24 → 62 nmol/L); no between-group difference in adiponectin; no change in HbA1c or FPG	21	56.8	High risk
264	2021	NCT03748576	China	GDM	Upper-middle-income	Beijing Municipal Science and Technology Commission (Z161100000516117); Chinese Academy of Medical Sciences (2019XK320007)	309	Parallel, multicentre randomized controlled trial	Nine antenatal institutions across China	Open-label (participants, clinicians unblinded; assessors blinded)	Computer-generated sequence	Yes – sealed opaque envelopes	Yes	Complete-case analysis (71% completed postpartum OGTT)	Postpartum T2DM incidence: 12.36% (MM) vs 3.88% (SM), p=0.029; OGTT 24–28 wk higher in T2DM cases (FPG 6.08 vs 4.9, p=0.005; 1h 13.2 vs 10.0, p<0.001); higher OGTT = risk factor for T2DM	29	78.4	High risk
265	2021	None reported	China	GDM	Upper-middle-income	None (authors state “Funding: None”)	150	Non-randomized intervention study (self-assigned groups)	Single centre (Haikou Hospital)	None	None – groups assigned by exposure	None	Not ITT	No imputation reported	Means ± SD, p-values for metabolic parameters	20	54.1	Some concerns
266	2018	EudraCT 2007-000634-39; ClinicalTrials.gov NCT01018602	Germany	GDM	High-income	Forschergruppe Diabetes e.V. (Munich-Neuherberg); Federal Ministry of Education and Research, Germany (FKZ 01GI0805-07); Novartis Pharma provided study drug	113	Phase II randomized, double-blind, placebo-controlled trial	Single-centre (Forschergruppe Diabetes e.V., Munich)	Double-blind (participants, clinicians, and analysts)	Centralized computer-generated randomization (1:1)	Yes – independent allocation via sealed system	Yes – intention-to-treat (all with ≥1 post-baseline measurement)	Missing values not imputed; complete-case analysis	Postpartum diabetes (ADA 2012): 7% vs 13% (HR 0.59; 95% CI 0.14–2.47, p=NS); IFG/IGT: 22% vs 43% (HR 0.55; 95% CI 0.26–1.19, p=NS); HbA1c ↓ at 18 mo (p=0.02); no sig. BMI or BP differences	32	86.5	High risk
267	2008	ISRCTN51367236	Australia	PCOS	High-income	Competitive CVL grant (Pfizer Australia); Jean Hailes Foundation Grant; metformin supplied by Douglas Pharmaceuticals Australia	38	Randomized controlled trial (open-label; pharmacologic)	Single academic health service (endocrinology/diabetes units)	Open-label (research nurse blinded to allocation for data collection)	Computer-generated random numbers	Not described	Not explicitly stated	Complete-case analysis; exclusions described for hsCRP >10 mg/L	Metformin reduced insulin resistance by ~35%, OCP increased insulin resistance by ~33% (p<0.01); RBP4 did not differ between PCOS and controls and did not change with either intervention	24	64.9	Some concerns
268	2005	Not registered (pre-trial registration era)	Taiwan	PCOS	High-income	None reported	60	Randomized controlled trial (oocyte-level)	Single tertiary IVF centre	Embryologists assessing embryos blinded to insemination method	Block randomization: first oocyte randomised, then alternating IVF/ICSI	No—allocation alternating after initial random oocyte	No ITT – oocyte-level analysis only	Cycles with <6 oocytes removed before randomization; remaining complete datasets analysed	Fertilization rate: 72.0% (ICSI) vs 44.8% (IVF), p<0.001; Complete fertilization failure: 15% IVF vs 0% ICSI	28	75.7	High risk
269	2014	ISRCTN41202110	Ireland	GDM	High-income	Health Research Board (Ireland)	54	Randomised controlled trial (behavioural intervention)	Single-centre (community programme, Galway, Ireland)	Open-label	Computer randomisation via study statistician	Yes – by independent administrator	Not explicitly stated; analysis based on available data	Missing cases excluded; no imputation described	Two significant predictors: older age ↑ participation (OR 1.09 [1.00–1.18]); insulin use ↓ participation (OR 0.34 [0.14–0.82])	19	51.4	High risk
270	2017	Not registered	USA	PCOS	High-income	Maimonides Medical Center Research & Development Foundation	68	Randomized, single-blind, placebo-controlled clinical trial	Single centre (Maimonides Women’s Health Center, NY)	Single-blind (participants blinded; investigators not clearly stated)	Not described; 2:1 allocation ratio	Placebo identical in appearance; likely adequate but not explicitly detailed	No ITT; only completers analysed	Complete-case analysis; no imputation	VEGF ↓ significantly: 1106.4→965.3 pg/mL (p<0.001) vs placebo NS; FGS ↓ (9.8→8.1, p<0.01); triglycerides ↓ (138→117 mg/dL, p=0.03); intermenstrual interval ↓ (80→60 days, p=0.04)	25	67.6	Some concerns
271	2023	IRCT20201029049183N1 (Iranian Registry of Clinical Trials)	Iran	PCOS	Upper-middle-income	not reported	58	Randomized clinical trial	Single-centre (Tehran University of Medical Sciences)	Triple-blinded (statistician, patients, investigators blinded) Decipherer not part of research team Identical-coded ASX and placebo bottles	Block randomization (block size 4)	Sequentially numbered sealed opaque envelopes	not reported	not reported	Significant decreases: GRP78, CHOP, XBP1 (treatment vs placebo) ATF4 increased significantly ATF6 mRNA: no significant change FF TAC significantly increased in ASX group Clinical outcomes: No significant difference in number of oocytes, fertilization rate, or fertility rate ASX group had higher high-quality oocyte rate, embryo quality, and maturity	23	62.2	Some concerns
272	2024	IRCT20201029049183N2	Iran	PCOS	Upper-middle-income	Tehran University of Medical Sciences and Health Services	56	Randomized, double-blind, placebo-controlled trial	Single infertility clinic (Omid Clinic, Tehran)	Double-blind (participants and researchers)	Blocked randomization	Yes – allocation concealed	Not explicitly stated	Dropouts reported (personal reasons); complete-case analysis	Inflammation: IL-18 change −27.5 ± 43.9 vs +9.1 ± 22.1 pg/mL (p=0.003); IL-6 −1.37 ± 1.55 vs −0.31 ± 1.43 pg/mL (p=0.013); TNF-α −1.89 ± 2.21 vs −0.56 ± 1.25 pg/mL (p=0.009); CRP −0.39 ± 0.54 vs −0.17 ± 0.62 mg/L (NS, p=0.177). Gene expression (PBMCs): CHOP p=0.008, ATF4 p=0.038, XBP1 p=0.002, DR5 p=0.016; GRP78 borderline p=0.051, ATF6 NS p=0.067. Caspases: active caspase-3 ↓ (p=0.012); caspase-…	30	81.1	Some concerns
273	2019	IRCT201105216541N1	Iran	PCOS	Upper-middle-income	Shiraz University of Medical Sciences (Grant ct-89-5522)	232	Double-blind, placebo-controlled randomized clinical trial	Two ART centers (Shiraz Mother & Child Hospital; Bushehr Omid–Persian Gulf Center)	Double-blind (participants + physicians + assessors)	Randomization table prepared by pharmacist; coded packages of LDA vs placebo	Identical capsules coded by pharmacist; double-blind maintained until study end	No — 18 protocol deviators excluded; per-protocol analysis	18 protocol deviations excluded; final n=214; no imputation	Moderate–severe OHSS: 34.9% vs 30.5% (p=0.494). Fertilization rate: 71.9% vs 65.1% (p<0.001). Grade III embryos: higher with LDA (3.28±3.53 vs 1.46±1.42, p=0.014). No differences in pregnancy or implantation. (Tables 2–3, pages 258–259)	27	73	Some concerns
274	2017	IRCT201701295623N105	Iran	PCOS	Upper-middle-income	None reported	60	Parallel-group RCT	Single endocrine/gynecology clinic	Open-label after randomization (no placebo)	Computer-generated random numbers	Sequentially numbered sealed envelopes	Yes—explicitly stated ITT	ITT performed using all 60 randomized; missing outcomes handled by ITT models	Total testosterone: −1.4±4.2 vs +0.7±1.4 nmol/L (P=.03); mFG: −1.1±0.7 vs −0.5±0.8 (P=.01); hs-CRP: −2.6±3.9 vs +0.2±1.5 mg/L (P<.001); IL-1 gene expression ↓ significantly	31	83.8	Low risk
275	2017	IRCT201604145623N75	Iran	PCOS	Upper-middle-income	Vice-chancellor for Research, Arak University of Medical Sciences	90	Randomized double-blind placebo-controlled trial	Single referral PCOS clinic	Double-blind	Computer-generated random numbers	Yes – handled by trained clinic staff	Yes – all randomized analyzed	Complete-case; no loss to follow-up	25-OH-Vit D: +12.0±2.5 vs +5.9±4.4 vs +0.2±0.9 ng/mL (p<0.001). HOMA-IR: −0.5±0.4 vs −0.3±0.7 vs −0.1±0.6 (p=0.004). Total testosterone: −0.2±0.2 vs −0.1±0.6 vs +0.1±0.2 ng/mL (p=0.02). SHBG: +19.1±23.0 vs +4.5±11.0 vs +0.7±10.4 nmol/L (p<0.001). FAI: −0.06±0.12 vs −0.02±0.12 vs +0.004±0.04 (p=0.04). Hirsutism score: −1.1±1.1 vs −0.8±1.2 vs −0.1±0.4 (p=0.001). hs-CRP: −0.7±1.4 vs −0.5±0.9 vs +0.5…	26	70.3	Some concerns
276	2018	IRCT20170513033941N22	Iran	PCOS	Upper-middle-income	Research Deputy of Arak University of Medical Sciences (AUMS)	60	Randomized, double-blind, placebo-controlled clinical trial	Referral clinic (Kosar Clinic, Arak, Iran)	Participants and investigators	Random allocation (specific method not reported)	Double-blinded	Not reported	Not reported	Mental health: BDI −0.76 (p=0.003), GHQ −1.15 (p=0.007), DASS −1.49 (p=0.009) Hormonal: Total testosterone −0.26 ng/mL (p=0.03), SHBG unchanged, mF-G −0.43 (p=0.008) Inflammation: hs-CRP −0.58 mg/L (p=0.004), NO unchanged Oxidative stress: TAC +84.76 mmol/L (p<0.001), GSH +26.78 μmol/L (p=0.02), MDA −0.29 μmol/L (p=0.03)	33	89.2	Some concerns
277	2018	IRCT201610015623N90	Iran	GDM	Upper-middle-income	Vice-Chancellor for Research, Arak University of Medical Sciences	40	Double-blind, randomized, placebo-controlled trial	Single-centre (Arak University of Medical Sciences)	Double-blind (participants, investigators, analysts)	Computer-generated random numbers	Yes – identical capsules and coded packaging	No explicit ITT; complete analysis of all 40 completers	100% completion; no imputation required	↓ FPG (−4.4 ± 2.3 vs +2.9 ± 14.3 mg/dL, p=0.02), ↓ TG (−8.3 vs +15.7 mg/dL, p=0.01), ↑ LDL (+11.2 mg/dL, p=0.04), ↑ HDL (+2.9 mg/dL, p=0.02), ↓ hs-CRP (p=0.01); upregulated PPAR-γ (p=0.04); ↓ LDLR (p<0.001), ↓ IL-1 (p=0.007), ↓ TNF-α (p=0.01)	24	64.9	Some concerns
278	2019	IRCT201704225623N109	Iran	GDM	Upper-middle-income	Research Deputy of Arak University of Medical Sciences (Grant No. 1395.408)	60	Randomized double-blind placebo-controlled trial	Single-centre antenatal clinic (Kosar Clinic, Arak)	Double-blind (participants and investigators)	Computer-generated random numbers	Yes – allocation concealed until final analysis	Not explicitly stated	Unclear	Complete-case analysis; no imputation (no loss to follow-up)	29	78.4	Some concerns
279	2022	IRCT20130903014551N9	Iran	PCOS	Upper-middle-income	not mentioned	64	Parallel-group randomized clinical trial	Single-centre (Shahid Beheshti Obstetrics & Gynecology Hospital, Isfahan)	Double-blind (participants + outcome assessors)	Computer-generated random sequence using SPSS; 1:1 allocation	Supplement containers numbered independently by non-study staff	Yes — data analysed for all 64 participants	ITT with linear regression; all participants kept in analysis	Magnesium significantly improved QoL components (PF, RP, RE, VT, MH, SF, GH, total QoL; p ≤ 0.013). No effect on AUB, alopecia, acne.	28	75.7	Some concerns
280	2016 (online 2015)	IRCT201405082624N15	Iran	PCOS	Upper-middle-income	Not reported (no conflicts; no financial relationships declared)	120	Randomized, double-blind, placebo-controlled clinical trial	Two teaching hospitals (Akbarabadi & Shariati, Tehran)	Double-blind (participants + investigators)	Stratified block randomization; random allocation software	Sealed, opaque envelopes; pharmacist-coded medication boxes	Yes – ITT stated and used	Pregnancies, GI side effects led to dropout; ITT retained participants; missing cause exclusions documented	NAC superior for: BMI ≥30 reduction (35.4% vs 15.2%, p=0.033); FBS (90.0 vs 86.6 mg/dL, p=0.021); fasting insulin (p=0.004); HOMA-IR (p=0.001); LDL (p=0.017). Both improved TG and cholesterol.	33	89.2	Some concerns
281	2019	NCT02513381	United Kingdom	PCOS	High-income	No external funding; vitamin D and placebo supplied by Internis Pharmaceuticals Ltd.	40	Randomized double-blind placebo-controlled trial	Single academic medical center (Hull University Teaching Hospitals NHS Trust)	Double-blind (participants and investigators)	Computer-generated randomization list	Yes – centralized by independent provider	No	Complete-case analysis; dropouts excluded; no imputation	ALT significantly reduced in vitamin D vs placebo (−16.7% vs +18.6%, P=0.001); ELF score improved within vitamin D group (P=0.022); weak reduction in HOMA-IR vs placebo (P=0.051); no effects on lipids, weight, or androgens	31	83.8	Some concerns
282	2023	ClinicalTrials.gov NCT04861324	United States	GDM	High-income	NIH (NIGMS GM103440) and UNLV School of Integrated Health Sciences Dean’s Faculty Development Award	38	Parallel, 2-arm, randomised controlled trial	Single-centre (UNLV Maternal-Fetal Medicine Clinic, Sunrise Hospital, Las Vegas)	Open-label (participants unblinded; analysts blinded)	Computer-generated randomisation, 1:1 allocation	Yes – sealed opaque envelopes	Not explicitly stated but analysed by group allocation	No missing data reported; complete data for 38 participants	↓ Random glucose (128 → 112 mg/dL, p=0.04), ↓ IL-6 (34.6 → 26 pg/mL, p=0.03), ↑ HDL-C (43 → 51 mg/dL, p=0.03), ↑ antioxidant capacity (3.8 → 6.3 µmol/L, p=0.001); no BMI change	29	78.4	High risk
283	2011	ClinicalTrials.gov NCT00484705	Sweden	PCOS	High-income	Swedish Medical Research Council; Novo Nordisk Foundation; Osher Center for Integrative Medicine; multiple Swedish foundations	84	Randomized controlled trial (3-arm, parallel)	University hospital & academic research centre	Open-label (participants/practitioners); outcome assessors blinded	Computer-generated stratified block randomization (age, BMI)	Yes – concealed until assignment	Yes – ITT explicitly stated	Last observation carried forward for missing data	Primary outcome (T at 16 wks): EA −0.10±0.14 ng/mL (−25%) vs exercise −0.04±0.14 (−7%), P=0.038. Menstrual frequency: EA 0.28→0.69/month (+146%) vs exercise +58%, P=0.018. ADT-G: −30% EA vs −4% exercise, P=0.030. 3G: −28% EA vs −6% exercise, P=0.047. Follow-up (32 wks): Acne −32% EA vs exercise, P=0.006. Both EA and exercise superior to no intervention for menstrual frequency (P<0.001).	34	91.9	High risk
284	2015	NCT02187250	Slovenia	PCOS	High-income	Ministry of Health, Republic of Slovenia (Tertiary Care Scientific Grant No. 20120047); Takeda and Novo Nordisk did not participate in study conduct.	45	Prospective, randomized, open-label, parallel-group pilot trial.	Single academic tertiary endocrine and gynecology center.	None (open-label).	Block randomization (block sizes 3, 6, 9) using Excel-generated random number list.	NR	No. Analyses conducted on evaluable/completer population.	Dropouts excluded from final analyses; no imputation.	Weight loss: LIRA −3.1 ± 3.5 kg (p=0.006); ROF −2.1 ± 2.0 kg (p=0.002); MET −0.2 ± 1.83 kg (NS). Between-group: LIRA superior to MET for weight (p=0.022), BMI (p=0.020), waist (p=0.007). VAT: Significant reduction only with LIRA (p=0.015). Glucose: LIRA improved OGTT glucose (120-min p=0.041 vs MET). Hormones: ROF reduced total testosterone (p=0.050) and increased menstrual frequency (p=0.009).	22	59.5	Some concerns
285	2015	NCT01899430	Slovenia	PCOS	High-income	University Medical Center Ljubljana grant (No. 20120047)	32	Prospective randomized controlled trial	Single-centre university medical center (endocrinology clinic)	Open-label	RAND function in Excel	Not described	Yes – ITT explicitly reported	Dropouts described; evaluable-patient analysis; no imputation	BMI ↓ −0.98 kg/m² and weight ↓ −2.52 kg in both arms (p<0.001); subset with insulin resistance showed greater BMI reduction with liraglutide (−2.13 vs −0.62 kg/m²); no overall between-group difference	24	64.9	High risk
286	2022	NCT03336840	China	PCOS	Upper-middle-income	National Natural Science Foundation of China (81770819, 82030026, 81570736)	60	Randomized controlled clinical trial	Single tertiary endocrine/metabolic clinic (Nanjing Drum Tower Hospital)	No blinding (open-label)	Random digits table; 1:1:1 allocation	Not described; appears unblinded to participants but products packaged separately; no placebo	No ITT; per-protocol	4 lost before randomization; 60 completed; no imputation	Menstrual recovery: Probiotics 40%; Metformin 55%; Combination 80% (p=0.035). Ovulation: 30% vs 55% vs 75% (p=0.017). AMH: ↓ in metformin & combination (p<0.05). SHBG ↑ & FAI ↓ in probiotics (p<0.05). BMI ↓, mF-G ↓, FBG ↓, HOMA-IR ↓, TG ↓, TC ↓ in probiotics & metformin groups (p<0.05). Figure 1 (page 4) visually shows the reductions across groups.	21	56.8	High risk
287	2019	Not reported	China	PCOS	Upper-middle-income	Not reported	79	Randomized controlled trial (parallel)	Single-centre reproductive medicine hospital	Open-label	Randomly divided into groups (method not detailed)	Not described	Not stated	Complete-case analysis; no imputation described	Combination therapy improved cervical mucus score, follicular development rate, single follicle ovulation rate, endometrial thickness, three-line sign positivity, and FSH (p<0.05); no significant difference in overall ovulation or pregnancy rates	19	51.4	Some concerns
288	2025	Not reported (ethics approval: 2024-7th-HIRB-023)	China	PCOS	Upper-middle-income	Shanghai Pudong New Area Health Commission; Seventh People’s Hospital TCM Talent Program	104	Randomized controlled trial (open-label)	Single center (Seventh People’s Hospital of Shanghai Univ. of TCM)	Open-label	Random number table method	None reported	No (per-protocol style; no ITT stated)	No imputation; all analyses on completers	Anthropometrics: BMI and WC significantly ↓ in intervention (p<.05). Glycemic: FINS ↓ (11.11 vs 13.47 μU/mL); HOMA-IR ↓ (0.93 vs 1.29), both p<.001 (Table 4). Lipids: TC, TG, LDL-C significantly lower vs control (p<.001–.002); HDL-C ↑ in both groups (Table 5). Hormones: FSH, LH, E2, P decreased in both groups without between-group differences (Table 3).	23	62.2	Some concerns
289	2022	ChiCTR2000033963	China	GDM	Upper-middle-income	Zhejiang Provincial Medical & Health Science and Technology Plan Project	131	Parallel RCT	Single tertiary maternity hospital	Participants unblinded; physicians & lab staff blinded	Computer-generated random number table	Sealed opaque envelopes	Yes	Minimal missing data; ITT applied	Significant improvement in 2-h PPG and postpartum OGTT; no difference in maternal/neonatal outcomes	28	75.7	Some concerns
290	2020	NTR2450	Netherlands	PCOS	High-income	Institutional grant for PhD position; no commercial funders	183	Randomized controlled trial (three-arm)	Single academic reproductive endocrinology center (Erasmus MC)	No blinding of participants or providers; outcome measurement structured but unblinded	Computer-generated, 1:1:1 ratio; sealed, identical, sequentially numbered envelopes	Yes – sealed envelopes prepared by nurse not involved in study	Yes – all randomized participants included in ITT models	Mixed-model approach used; no imputation required; dropout tolerated statistically	Mean weight loss: CAU −2.32 kg; LS −4.65 kg; LS+SMS −7.87 kg (all p<0.001). LS vs CAU difference: −3.7 kg (p<0.001). Odds of ≥5% loss: OR 7.0 (p<0.001). Weight gain: 29% CAU vs 8.5% LS vs 3.1% LS+SMS.	35	94.6	Low risk
291	2013	ClinicalTrials.gov NCT00921492	Sweden	PCOS	High-income	Swedish Research Council; Novo Nordisk Foundation; LUA/ALF agreement; multiple Swedish foundations; NIH support for investigator	32	Prospective randomized controlled trial	Single university research center	Investigators blinded; participants not blinded	Computer-generated randomization (randomization.com)	Yes – investigators blinded until analysis	Yes – explicitly stated	Baseline observation carried forward for post-baseline dropouts	Ovulation frequency: 0.76 ± 0.27 vs 0.41 ± 0.28 ovulations/month (P = 0.002). Free testosterone: −2.22 ± 6.4 pg/mL vs +1.05 ± 1.5 (between-group P = 0.004; Bonferroni-corrected P = 0.048). Estradiol (AUC): −21.38 vs +20.15 pg·h/mL (P = 0.001; corrected P = 0.012). DHEA (AUC): −1.74 vs +1.30 ng·h/mL (P < 0.001; corrected P = 0.002). LH pulsatility: no between-group difference.	33	89.2	Some concerns
292	2010	NCT00795808	New Zealand	PCOS	High-income	Auckland Medical Research Foundation; Mercia Barnes Trust; University of Auckland Research Committee	171	Multicentre double-blind placebo-controlled RCT	4 New Zealand fertility centres	Double-blind (participants, clinicians, pharmacists)	Block randomisation (BMI>32: blocks of 10; BMI≤32: blocks of 15)	Third-party pharmacy-controlled concealed allocation by telephone	Yes – explicit ITT	Lost to follow-up assumed not pregnant / no live birth	BMI>32: LBR 16% vs 6% (NS); CPR 22% vs 15% (NS). BMI≤32: LBR 29% vs 36% vs 43% (NS); CPR 40% vs 39% vs 54% (NS). No significant differences P>0.2	36	97.3	Some concerns
293	2021	EUDRA-CT 2016-001719-19 (ethics approval noted); parent RCT published in Am J Psychiatry (Comasco et al., 2021)	Sweden	PMDD	High-income	Swedish Research Council; Swedish Society of Medicine; Swedish Brain Foundation; EU FP7; Science for Life Lab; Gedeon Richter supplied study drug	35	Double-blind placebo-controlled randomized trial (neuroimaging substudy of RCT)	Single-center (Uppsala University)	Double-blind (participants, investigators, assessors)	Randomized (method not fully described here; see parent RCT; double-blind drug allocation)	Yes—double-blind with identical placebo and active tablets	No ITT stated for the substudy (per-protocol imaging sample)	Participants with <3 aggressive responses or excessive motion excluded; no imputation; complete-case	SPRM ↓ progesterone to near 0; ↓ DRSP total score (d=1.09); ↓ irritability trend (p=0.055); ↑ fronto-cingulate activation (dACC & dmPFC) during aggressive responses; treatment-behavior interaction: negative correlation between aggression & BOLD only in placebo	30	81.1	Some concerns
294	2024	EUDRA-CT 2016-001719-19	Sweden	PMDD	High-income	Swedish Research Council; Swedish Society of Medicine; Swedish Brain Foundation; SciLifeLab	35	Double-blind RCT	Single academic center (Uppsala University)	Double-blind	Randomized to ulipristal 5 mg vs placebo	Identical blister packs; investigator and participant blinded	No (per-protocol MRI completers analyzed)	No imputation; only those completing both MRI scans included	No WMV differences in treatment × time interaction; no within-group changes; clinical symptoms improved in SPRM: DRSP ↓ (38.7 → lower vs placebo 57.7, p=0.01); depressive mood, anxiety, affective lability improved (p≤0.05)	31	83.8	High risk
295	2025	EUDRA-CT 2016-001719-19	Sweden	PMDD	High-income	Swedish Research Council; Swedish Society of Medicine; Swedish Brain Foundation	35	Double-blind randomized placebo-controlled RCT	Multicentre (4 Swedish university hospitals)	Double-blind (participants, investigators, raters)	Block randomization (block size 4) by external pharmacy authority	Yes – identical packaging; codes held independently	Yes – all available data included	1 excluded for MRI motion; no imputation used	Primary: No longitudinal group × time changes in FA/MD/RD/AD. Secondary: At follow-up, ulipristal showed ↓FA and ↑MD/RD/AD in anterior corona radiata, thalamic radiations, fornix, cingulum, SLF. No associations with symptom change.	32	86.5	High risk
296	2020	NCT01269125	Greece & Japan	Endometriosis	High-income	Three tertiary university hospitals: Patras (Greece), Ioannina (Greece), Tottori (Japan)	400	Prospective, randomized, controlled clinical trial	Multicenter (3 tertiary university hospitals)	None (open-label)	Internet-based randomization system; centrally allocated	not reported	not reported	not reported	Cytokines: Significantly reduced in Group A compared to Group B Fertilization rate (FR): Group A: 72.7% (95% CI 70.5–74.9) Group B: 61.7% (95% CI 59.2–64.2) Group C: 74.7% (95% CI 72.0–77.2) Implantation rate: No significant difference Clinical pregnancy rate: OR 1.16 (95% CI 0.73–1.84), P=0.52 (not significant)	27	73	Some concerns
297	2015	Not reported	India	PCOS	Lower-middle-income	None (no financial support; no conflicts)	105	3-arm parallel RCT	Single private hospital (Bhubaneswar)	Unblinded	Envelope selection; equal number envelopes prepared by independent nurse	Low—patients self-selected envelopes; potential predictability	No ITT	24 dropouts excluded; per-protocol only	Ovulation: 56.2% (CC) vs 62.5% (met) vs 83.3% (combo); LBR: 28.1%, 37.5%, 41.6%; combo vs CC ovulation OR 3.888 (1.08–13.99)	24	64.9	Some concerns
298	2013	NCT00396513	Poland	PCOS	High-income	Polish State Committee for Scientific Research; NICHD (R01 HD050656); NCCAM (AT002280); ALSAM Foundation. No conflicts declared.	62	Randomized, parallel-group, open-label clinical trial with three intervention arms	Multicentre academic hospitals.	NR	Random assignment to three treatment arms (method of sequence generation not explicitly described).	NR	NR	NR	Baseline: FABP4 correlated with BMI, insulin resistance, HDL, free testosterone, SHBG; RBP4 correlated with total cholesterol. Intervention effects: Neither metformin nor simvastatin (alone or combined) changed FABP4 or RBP4 levels. Metabolic effects: Simvastatin ↓ total cholesterol (−21%), LDL (−29%), hs-CRP (−36%); metformin showed minimal metabolic effects in this cohort.	26	70.3	Low risk
299	2025	not reported	Turkey	PCOS	Upper-middle-income	not reported	80	Prospective randomized controlled trial	Single center (Infertility and ART Center, Atatürk University)	not blinded	Computer-generated block randomization (blocks of 20)	Sealed opaque numbered envelopes	not reported	not reported	Median follicle development: traditional 41 days vs stair-step 25 days, P<0.001; ovulation rates similar (93% vs 90%), pregnancy rates similar (8% vs 5%)	29	78.4	Some concerns
300	2015	IRCT201407115623N23	Iran	GDM	Upper-middle-income	Vice-Chancellor for Research, Arak University of Medical Sciences (Grant 92–158)	60	Parallel, double-blind, placebo-controlled RCT	Single-centre (Arak University of Medical Sciences)	Double-blind (participants, clinicians, analysts)	Computer-generated random numbers (1:1), stratified by BMI and gestational week	Yes – opaque sealed envelopes; allocation by independent midwife	Not stated (complete data from 60 participants)	No imputation; all participants completed	↓ Cesarean section (23.3% vs 63.3%, p=0.002); ↓ maternal hospitalization (0% vs 13.3%, p=0.03); ↓ macrosomia (0% vs 13.3%, p=0.03); ↓ neonatal hyperbilirubinemia (20% vs 56.7%, p=0.03); no difference in preeclampsia or insulin need	31	83.8	Some concerns
301	2016	IRCT201601035623N63	Iran	GDM	Upper-middle-income	Vice Chancellor for Research, Iran University of Medical Sciences	60	RCT (double-blind, placebo-controlled)	Single outpatient clinic (Kosar Clinic, Arak)	Double-blind (participants, investigators, lab)	Computer-generated random numbers	Concealed from researchers and participants by independent midwife	Yes (ITT used)	LOCF (last observation carried forward)	FPG: −9.2 vs +1.1 mg/dL (p<0.001); Insulin: −0.8 vs +4.5 IU/mL (p=0.01); HOMA-IR: −0.4 vs +1.1 (p=0.003); QUICKI ↑ (p=0.007); Triglycerides −1.6 vs +27 mg/dL (p=0.03); VLDL ↓ (p=0.03); No difference in total/LDL/HDL	32	86.5	Some concerns
302	2022 (online 2021)	IRCT20170513033941N36	Iran	PCOS	Upper-middle-income	Iran University of Medical Sciences (Grant 97102)	55	Randomized, double-blind, placebo-controlled clinical trial	Single gynecology clinic (Akbarabadi Clinic, Tehran)	Double-blind (participants + investigators)	Randomization to CoQ10 vs placebo (method not explicitly detailed)	Identical placebo capsules; packaging uniform	No ITT; completer analysis	7 dropouts excluded (3 placebo; 2 CoQ10); no imputation	Mental health: BDI ↓ (β −0.62; p=.03), BAI ↓ (β −0.62; p=.01). Inflammation: hs-CRP ↓ (β −0.48 mg/L; p=.005). Hormonal: T ↓ (β −0.25; p=.004), DHEAS ↓ (β −0.51; p<.001), SHBG ↑ (β +8.76; p<.001), hirsutism ↓ (β −0.82; p=.002). Oxidative stress: TAC ↑ (β +108.7; p<.001), MDA ↓ (β −0.32; p=.001). No effect on GSH or total nitrite.	30	81.1	High risk
303	2020	IRCT2014110515536N2	Iran	PCOS	Upper-middle-income	No external funding reported	99	Randomized, double-blind, placebo-controlled trial	Single tertiary women’s hospital (Arash Hospital, Tehran)	Double-blind (participants and investigators)	Computer-generated block randomization (block size = 6)	Yes – sequentially numbered, sealed opaque envelopes	Yes – explicitly stated	Dropouts reported; ITT analysis performed	LDL: CMD −4.66 mg/dL (95% CI 0.20 to 9.13), p = 0.041. HDL: CMD +1.80 mg/dL (95% CI 0.34 to 3.26), p = 0.016. Total cholesterol: CMD +3.12 mg/dL (95% CI −5.22 to 11.45), p = 0.459 (NS). Triglycerides: CMD −5.62 mg/dL (95% CI −23.89 to 12.66), p = 0.543 (NS). BMI: CMD −0.12 kg/m² (95% CI −1.27 to 1.02), p = 0.829 (NS). WC: CMD +0.23 cm, p = 0.810 (NS).	33	89.2	Some concerns
304	2010	not mentioned	Iran	PCOS	Upper-middle-income	not mentioned	343	Prospective randomized double-blind study	University-based infertility clinic and research center (Yazd Shahid Sadoughi University of Medical Sciences)	Double-blind stated, but method not detailed	Random assignment into four groups (specific method not detailed)	not specified	not reported	not reported	Waist circumference, LDL, insulin, SHBG, testosterone improved significantly in lifestyle group; clinical pregnancy rates: Clomiphene 12.2%, Metformin 14.4%, Clomiphene + Metformin 14.8%, Lifestyle 20% (NS, P=0.56)	24	64.9	Some concerns
305	2009	not stated	USA	PCOS	High-income	California Dairy Research Foundation, ALSAM Foundation, Glanbia Foods (supplements provided), University of California-Davis Clinical and Translational Science Center Country: USA	33	Randomized controlled trial (RCT), single-blinded	Single centre- University PCOS clinic (University of California-Davis)	Single-blinded (participants and dietitians blinded to supplement type)	Block randomization	Supplements packaged identically; dietitians blinded	Not explicitly stated	Not explicitly stated	Protein group lost more weight (3.4 ± 0.8 kg vs 1.1 ± 0.6 kg; P<0.03) and fat mass (3.1 ± 0.9 kg vs 0.5 ± 0.6 kg; P<0.03); HDL, Apo B, and total cholesterol decreased more in protein group; no significant changes in fasting glucose, insulin, HOMA, triglycerides, hs-CRP, or sex steroids	22	59.5	High risk
306	2021	ISRCTN76278694	UK	PCOS	High-income	Fractyl investigator-initiated research programme; NIHR support	32	Randomized, double-blind, sham-controlled trial	Two-centre (Imperial College London; Coventry & Warwickshire)	Double-blind (participants + study staff; endoscopist unblinded)	Computer-generated algorithm	Sealed envelope opened by endoscopist only; participants & staff blinded	Yes — mITT used	mITT + per-protocol; replaced participants who could not complete procedure; no imputation described	No significant differences in primary outcomes: clamp insulin sensitivity at 12 weeks (5.4 vs 5.6 mg/kg/min); HOMA-IR at 24 weeks (5.5 vs 5.0); menses median 2 vs 0.5. No differences in glucose AUC, insulin AUC, ovulation, hormones.	29	78.4	High risk
307	2009	None reported	Turkey	PCOS	Upper-middle-income	None reported	52	Prospective randomized clinical trial	University hospital (Gynecology + Endocrinology departments, Ankara)	Open-label	Random-number table; opaque sealed envelopes	Yes—sealed opaque envelopes	No ITT; all participants completed	All participants completed; no missing data	Homocysteine ↓: Atorvastatin −3.7 μmol/L (p<.01), Simvastatin −2.5 μmol/L (p<.05). Fasting insulin ↓: Atorvastatin −5.8 (p<.01), simvastatin ns. HOMA ↓: Atorvastatin 2.8→1.9 (p=.01), simvastatin ns. Total T ↓ ~40%; Free T ↓ ~38–46% (p<.01). Lipids ↓: TC and LDL significantly decreased in both groups. Vitamin B12 ↑: Atorvastatin +116.6 pg/mL (p<.01).	21	56.8	High risk
308	2015	Not reported	Turkey	PCOS	Upper-middle-income	Not reported	50	Randomized controlled trial (parallel; open-label)	Single-centre university hospital (endocrinology & cardiology departments)	Open-label	Randomized into two groups (method not detailed)	Not described	Not explicitly stated	Complete-case analysis; no imputation described	Combination group showed significant reductions in BMI and HOMA-IR; FMD increased slightly and CIMT decreased slightly with metformin, while OCP alone worsened trends (between-group differences NS)	20	54.1	High risk
309	2018	NCT01288638	Canada	PCOS	High-income	Not specified; academic research at Univ. of Saskatchewan	95	Randomized controlled trial; single-blind (investigators blinded)	Single centre (University of Saskatchewan)	Single-blind (investigators/data analysts blinded; participants not blinded)	Computer-generated schedule; metformin-stratified; fixed block size 4; permuted block randomization	Concealed from dietitian, exercise staff, and outcome assessors by coding	Yes – explicit ITT analysis used	Missing data replaced with 9-week values (LOCF) for post-intervention; follow-up analysis based on available cases	Pulse-diet vs TLC at 16 weeks: ↓ insulin AUC (−121 vs −27 μIU/mL·min, p=0.05); ↓ DBP (−3.6 vs −0.2 mmHg, p=0.05); ↓ TG (−0.2 vs 0.0 mmol/L, p=0.04); ↓ LDL-C (−0.2 vs −0.1 mmol/L, p=0.05); ↑ HDL-C (+0.1 vs −0.1 mmol/L, p<0.01); ↓ TC/HDL-C (−0.4 vs +0.1, p<0.001). Improvements in HDL-C and TC/HDL-C maintained at 12 months.	34	91.9	Some concerns
310	2020	NCT01288638	Canada	PCOS	High-income	Agriculture and Agri-Food Canada; Saskatchewan Pulse Growers; Canada Foundation for Innovation; University of Saskatchewan internal support	95	Multidimensional single-blind, metformin-stratified, parallel-group RCT	University-based clinical research centre	Single-blind (assessors blinded); participants unblinded	Computer-generated randomization; metformin-stratified	Not explicitly described	Not fully ITT—only women completing HRQoL surveys analyzed	No imputation; complete-case for HRQoL	HRQoL: Significant time-effects for all domains (healthy eating p=0.0001, PCOS knowledge p<0.001, active living p=0.0001, healthcare satisfaction p<0.0001, feelings/experience p=0.004). No group differences (p>0.13). Weight: −3.8 kg (pulse) vs −5.9 kg (TLC), p=0.005 (time-effect). Metabolic: HOMA-IR ↓1.1–1.3 (p<0.001); TT ↓0.2–0.3 nmol/L (p=0.05).	33	89.2	Some concerns
311	2021	IRCT20141025019669N12 (retrospective registration 07-07-2019)	Iran	PCOS	Upper-middle-income	Qazvin University of Medical Sciences; Ministry of Health & Medical Education Grant IR.QUMS.REC.1398.033	60	Randomized double-blind placebo-controlled clinical trial	Single centre (Kosar Hospital Specialist Center, Qazvin)	Double-blind for patient, researcher, physician	Simple random sampling; block randomisation based on BMI; random numbers table	Not explicitly described	Per-protocol only; dropouts not included (no ITT)	Not described; dropouts excluded	Mean±SD reported; between-group p-values; tables for all	27	73	High risk
312	2010	Not reported	Iran	PCOS	Upper-middle-income	No external funding reported	84	Prospective randomized double-blind placebo-controlled trial	University hospital infertility clinic	Double-blind (participants and investigators)	Random assignment by admission number (odd/even sequence)	Yes – sealed envelopes opened by blinded physician	Yes – all randomized completed	No missing data; complete-case analysis	Testosterone: −25.5% vs −16.8% (between-group p<0.001). LH: −4.22±0.91 vs −0.63±0.75 mIU/mL (p=0.001). LH/FSH ratio: −0.51±0.22 vs +0.06±0.24 (p=0.009). Total cholesterol: −64.8±26.3 vs −9.3±24.2 mg/dL (p<0.001). LDL: −24.5±20.2 vs −2.1±5.4 mg/dL (p<0.001). TG: −34.3±15.2 vs −5.8±17.7 mg/dL (p<0.001). HDL: +6.9±7.1 vs −0.4±4.7 mg/dL (p<0.001). Hirsutism score: −1.1±1.2 vs −0.6±1.9 (p=0.019). Insu…	32	86.5	Some concerns
313	2023	German Clinical Trials Registry DRKS00011313	Germany	Endometriosis	High-income	Erbe Elektromedizin GmbH. Open-access funded by Projekt DEAL.	39	Prospective, randomized, controlled, single-blinded clinical trial (patients blinded; surgeons not). Randomization at lesion level.	Single centre	Single-blinded: Pathologist assessing histology was blinded; surgeons were not. Participants were unaware of which technique was used.	Computer-generated randomization list assigning each lesion to HybridAPC or excision.	NR	NR	Lesions not relocatable at second-look laparoscopy excluded; no imputation.	Eradication: HybridAPC 64.9% (20/57) vs excision 81.0% (47/58). Non-inferiority not achieved (p=0.55). HybridAPC not significantly inferior either (p=0.082). Adhesions: 5.3% HybridAPC vs 10.5% excision (NS, p=0.49). Operating time: HybridAPC 69 s vs excision 106 s (p < .001). Complications: none in either group.	28	75.7	Some concerns
314	2021	NCT04500743	Egypt	Endometriosis	Lower-middle-income	No specific funding grant; institution-supported	134	Randomized parallel-group open-label non-inferiority RCT	Single centre (Minia Infertility Research Unit, Egypt)	Participants and clinicians unblinded; oocyte retrieval + ET physicians blinded	Computer-generated random sequence	Sealed opaque envelopes	Yes—full sample used; no dropouts	No missing data (all 134 completed trial)	Oocytes retrieved: 11.4 vs 11.1 (NS); fertilization rate 40.3% vs 47.7% (NS); pregnancy rate 22.4% vs 25.4% (NS); cost lower with Dienogest (2773 vs 3664 EGP, p < .001); side effects lower with Dienogest (29.9% vs 59.7%, p < .001)	34	91.9	High risk
315	2006	Not registered (pre-2007 study)	USA	PMDD	High-income	Intramural funding, National Institute of Mental Health (NIMH), NIH, USA	31	Randomised double-blind placebo-controlled crossover (PMDD subgroup) following open-label phase	Single-centre (NIMH Behavioral Endocrinology Branch)	Double-blind crossover (participants and assessors blinded)	Computer-generated order randomisation for Mg vs placebo in crossover	Yes – allocation concealed until infusion day	No – per-protocol analysis	All completers included; missing data from 1 excluded; no imputation	Mg retention 31.5% (PMDD) vs 27.5% (control, p>0.05); no serum/RBC/MBC Mg differences; no Mg vs placebo mood difference (p>0.01)	23	62.2	Low risk
316	2006	not reported	USA	PCOS	High-income	not reported	31	Randomized prospective clinical trial	Single-centre (university-based medical center)	None (open-label)	Picking a card from a box with treatment assignments.	not reported	Not performed (all participants completed the trial)	not reported	SHBG increased significantly in both groups; greater rise in MET group (p < .05) Fasting insulin decreased significantly in MET group (p = .025) Glucose/insulin ratio improved (p = .05) Day-21 progesterone significantly higher in MET group (p = .015) Ovulation rate: 44% (MET+CC) vs. 6.7% (CC), p = .037 Pregnancy: 31% vs. 0%, p = .043 No significant changes in total/free testosterone	21	56.8	Some concerns
317	2019	TCTR20160701001	Thailand	GDM	Upper-middle-income	Faculty of Medicine Ramathibodi Hospital, Mahidol University	60	Double-blind, placebo-controlled RCT	Single tertiary hospital diabetes-in-pregnancy clinic	Double-blind (participants, clinicians, outcome assessors)	Computer-generated random block allocation	Sequentially numbered, opaque envelopes prepared by independent staff	Not explicitly stated but analysis conducted on randomized participants with complete outcome data	One participant lost; complete-case analysis; no imputation	HOMA-IR decreased significantly in probiotic group (from 2.88 → 2.24, P=0.010) vs no change in placebo (2.66 → 2.57, P=0.58); fasting glucose decreased (P=0.03); fasting insulin decreased (P=0.04); no differences in birthweight, neonatal hypoglycemia, or maternal outcomes	31	83.8	Some concerns
318	2011	Not reported	Turkey	PCOS	Upper-middle-income	None declared	96	Randomized controlled double-blind clinical trial	Single women’s health research hospital + associated biochemistry lab	Double-blind	Computer-based randomization list	Allocation concealed; list held by non-study medical staff who revealed group after participant enrollment	No — per-protocol (post-exclusions)	Excluded for side effects (n=5 metformin), non-adherence (n=4); no imputation used	Metformin: ↓ADMA, ↓Hcy, ↓HOMA-IR in both obese & non-obese groups (all p≤0.004); ↓hs-CRP in obese MET group (p=0.007); ↓BMI and ↓abdominal circumference in obese MET. OCPs: ↑ADMA (p≤0.006), ↑hs-CRP (p≤0.001), ↑Hcy in non-obese OCP; minimal change in HOMA-IR except small ↓ in obese OCP (p=0.03); BMI ↑ slightly.	29	78.4	Low risk
319	2010	not reported	South Korea	PCOS	High-income	not reported	60	Randomized, placebo-controlled trial (RCT)	Single-centre (university infertility unit)	Patient-blinded (placebo used). Investigator blinding not clearly described.	Sealed envelopes, simple randomisation	Adequate (sealed envelopes)	not specified	no missing data	Pioglitazone increased RI of ovarian stroma (p < 0.05) Lower estradiol levels (p < 0.01) Fewer large follicles (p < 0.01) Fewer oocytes retrieved (10 vs. 13.6; p < 0.01) Fertilization and embryo quality similar across groups Pregnancy rate slightly higher with pioglitazone (non-significant) Lower severe OHSS tendency (3.3% vs 10%, non-significant)	24	64.9	Some concerns
320	2022	ClinicalTrials.gov NCT00594217	USA	PCOS	High-income	NIH (NICHD R01 HD058671, P50 HD28934, R01 HD102060, K23 HD098319, F32 HD091951)	24	Randomized double-blind placebo-controlled crossover RCT	University Clinical Research Unit	Double-blind (participants & investigators)	Random-number table; crossover sequence randomized	Identical placebo; sealed double-blind	No ITT; per-protocol only	No imputation; all included participants completed both arms	Primary result: Progesterone did not acutely suppress LH pulse frequency in PCOS or controls (NS). Positive feedback: Progesterone acutely ↑ mean LH, FSH, LH pulse mass, pulsatile LH secretion in both groups. Trends toward smaller LH pulse mass & pulsatile LH responses in PCOS but not statistically significant after correction.	30	81.1	Some concerns
321	2024	jRCT2080225090	Japan	Endometriosis	High-income	Fuji Pharma Co., Ltd	88	Multicenter randomized open-label active-controlled parallel-group RCT	18 clinical sites across Japan	Open-label (no participant or provider blinding)	Web-based interactive response system; permuted-block; stratified by VAS severity & comorbidities	Allocation via independent system; likely adequate (described as independent office)	ITT/FAS applied (full analysis set)	No imputation; missing data minimal	Significant smaller increases in procoagulant markers with E4/DRSP; 4-fold higher APC resistance with EE/DRSP; SHBG +205% vs +63%; D-dimer +79% vs +16%	32	86.5	Some concerns
322	2019	Not reported	Iran	Endometriosis	Upper-middle-income	Research Deputy of Tehran University of Medical Sciences (Grant no. 940230-29327)	34	Randomized, placebo-controlled, double-blind exploratory clinical trial	Two centres (Arash & Shariati Hospitals, Tehran University)	Double-blind (participants and some investigators blinded)	Sealed uniform envelopes; 1:1 allocation	Yes – sealed envelopes and independent allocator	No ITT	Not reported	Significant reductions in mRNA & protein expression of MMP-2 and MMP-9; serum and EF levels decreased significantly vs placebo (all p < .05 to < .001); surgical removal of lesions also decreased levels	28	75.7	Some concerns
323	2013	None reported	Greece	PCOS	High-income	Not stated	50	Randomized controlled trial (sibutramine vs orlistat only)	Single academic endocrine gynecology unit	Not blinded (open-label)	Randomized to sibutramine or orlistat; method not specified	Not reported	No ITT; only completers analyzed	No imputation; complete-case	PAI-1: Sibutramine ↓ from 43.4→34.7 ng/mL (p<0.001); Orlistat no significant change (45.5→41.9, p=0.110). FAI: Sibutramine ↓ significantly (p=0.005); Orlistat NS. HOMA-IR: Similar reduction both groups (p<0.001 vs p=0.002). BMI: Both ↓ equally (~4 kg/m²). (Table 2)	23	62.2	Some concerns
324	2018	NCT02196571	Croatia	GDM	High-income	No external funding; conducted using institutional resources	42	Randomized controlled trial	Two university hospitals (Zagreb)	Unblinded participants; physicians & lab staff blinded	Web-based computerized block randomisation	Staff performing exercise sessions had no influence; opaque procedural separation	No	Listwise exclusion—dropouts excluded from analysis	Means, SDs, p-values, correlations, effect sizes, tables 1–3	27	73	Some concerns
325	2007	NR	Belgium	PCOS	High-income	Fund for Scientific Research, Flanders, Belgium.	80	Prospective, randomized, controlled pilot trial, three parallel arms.	Single tertiary university IVF center.	NR	Computer-generated randomization list, allocation performed by study nurse immediately before stimulation.	Partial — allocation sequence concealed from treating physician until assignment; no central allocation described.	Partial. Outcomes reported per patient randomized and per hCG/oocyte retrieval; cancelled cycles included in ITT tables.	Cycles cancelled before hCG or without embryos reported explicitly; no imputation performed.	Ongoing pregnancy per patient randomized: 25.0% (10,000 IU), 30.8% (5,000 IU), 30.8% (2,500 IU); p = 0.64. Ongoing pregnancy per hCG cycle: 26.9%, 30.8%, 34.8%; NS. Implantation rate: 22.6%, 33.3%, 40.9%; NS. Severe OHSS: 2 cases total (one in 10,000 IU, one in 5,000 IU).	25	67.6	Some concerns
326	2013	ISRCTN33885819	Finland	GDM	High-income	Juho Vainio Foundation; Yrjö Jahnsson Foundation; Pirkanmaa Hospital District Competitive Research Funding (EVO/TAYS); National Institute for Health and Welfare, Finland	399	Cluster-randomised controlled trial	Primary care maternity clinics (14 clinics in Finland)	Open-label (unblinded)	Computer-generated randomisation of matched clinic pairs (1:1 ratio)	Yes – allocation by independent statistician (UKK Institute)	Yes (intention-to-treat for cost outcomes)	Missing data <12%; 15D HRQoL missing values imputed via linear regression	Mean cost intervention €7,763 ± 4,511 vs €6,994 ± 4,326 (p=0.14); mean birth weight 3,521 g vs 3,636 g (p=0.025); ICER €7 per g of birth weight avoided; cost per 1-cm VAS health gain €1,697	31	83.8	High risk
327	2008	NCT00604864; EUDRACT EU-0053/endometriosis	Belgium	Endometriosis	High-income	Investigator-initiated; supported by Centocor (drug & monitoring)	21	Randomized, double-blind, placebo-controlled trial	Tertiary referral university hospital	Double-blind: investigators, research nurses, participants blinded	Sealed envelopes prepared externally (Centocor Paris)	Pharmacy-controlled sealed envelopes; allocation concealed from investigators & patients	ITT performed including all 21, but manuscript reports only 20 with confirmed disease (per-protocol)	No formal imputation; analysis based on available data	Pain decreased 25–30% in both placebo & infliximab groups (p<0.001). No difference between groups for any pain measure. After surgery: pain ↓ to <10% of baseline in both groups (p<0.001). Nodule size: no change. Endometrial thickness: unchanged.	24	64.9	High risk
328	2013	NCT01344486	Belgium	Endometriosis	High-income	Leuven Quality Surgery Fund; equipment support from Nordic Pharma, Fisher & Paykel, eSaturnus	27	Randomized controlled trial	Single tertiary university hospital	Surgeons unblinded; pain assessors and second-look surgeon blinded	Sealed envelopes, 3:2 allocation	Sealed opaque envelopes; sequentially numbered via research nurse	Not ITT; per-protocol (dropouts excluded)	No imputation; excluded dropouts (pregnancy, intra-op exclusions, refusals of second-look)	Adhesions: 12/16 FC had no adhesions vs 11/11 controls had severe adhesions (P=0.0005). Significant reductions in area, density, severity (P<0.001). Pain: VAS down 3.5 vs 9.7 (P<0.001). CRP: 63.5 vs 142.8 (P=0.01). Recovery faster: 19 vs 36.5 h to first flatus (P=0.002). CO₂ resorption significantly lower (P<0.001).	29	78.4	High risk
329	2014	NCT01483118	USA	PCOS	High-income	Institutional funding; Endocrine Fellows Foundation; Integrity Nutraceuticals supplied study drug	45	Randomized controlled trial	Single academic center (Columbia University)	Double-blind (participants & investigators)	1:1 allocation; method not fully described	Manufacturer-coded identical capsules (sealed system)	No	Per-protocol (only completers analyzed)	Menstrual cyclicity ↑ (0.75 vs 0.25 cycles/month, p=0.0085); change +0.23 vs –0.13 (p=0.0076); 5 luteal progesterone samples >3 ng/mL confirmed ovulation (page 3, Figure 2)	26	70.3	High risk
330	2008	NR	Cyprus	PCOS	High-income	Supported by IBSA Cyprus	225	Prospective randomized controlled trial, three parallel arms.	Single-centre private fertility clinic.	NR	Prospective randomization using sealed and numbered envelopes.	Yes — sealed envelope method described.	NR	Cancelled cycles excluded from downstream outcome analyses; no imputation described.	Cancellation rate: 22.7% (A) vs 17.3% (B) vs 9.3% (C). Oocytes retrieved: 7.0 vs 6.9 vs 8.5 (p<0.001 for C vs A/B). Clinical pregnancy rate: 31.0% vs 32.2% vs 48.5%. Live birth rate: 29.3% vs 25.8% vs 48.5%. Miscarriage rate: 38.9% vs 45.0% vs 21.2%. OHSS: highest in step-down group (13%).	27	73	Some concerns
331	2025	NCT03997773	Denmark	GDM	High-income	Danish public and research foundations (Steno Diabetes Centers + National Research Foundation)	277	Parallel, open-label RCT	Multi-centre (3 sites: Copenhagen, Aarhus, Odense)	No (open-label)	Random blocks (6/9/12/15) by site via REDCap	Yes (concealment until baseline complete)	Yes	Multiple imputation; best/worst-case scenario analyses	aDiff BMI −0.44 (95% CI −0.98 to 0.11); SF-12 MCS 0.06 (−2.15 to 2.27); OR 0.33 (95% CI 0.12–0.91 for FPG ≥6.1 mmol/L); TG −0.18 mmol/L (95% CI −0.30 to −0.05)	34	91.9	Some concerns
332	2021	DRKS00014720; secondary ID U1111-1213-4142	Germany	Endometriosis	High-income	PlantTec Medical GmbH; Open Access Funding by Projekt DEAL	50	Prospective randomized controlled trial	Single tertiary academic center (University Hospital Tübingen)	Single-blind (patients only); surgeon blinded until application stage	Simple randomization via RAND function in Excel	No placebo for device; only patients blinded; surgeon unblinded at treatment stage	No ITT explicitly stated; all randomized completed second look	No missing data; all 50 analyzed; complete-case	Adhesion score reduced 85% (14.2 → 2.2, p=0.004); incidence reduced 53% (2.3 → 1.1 sites, p=0.004); large effect sizes	31	83.8	High risk
333	2010	Not reported	India	PCOS	Lower-middle-income	Not reported	60	Randomized controlled trial	Single tertiary centre (AIIMS Delhi)	Not blinded (visible treatment)	Computer-generated randomization table	Sealed opaque envelopes (per methods text)	Not stated	No imputation; complete-case	At 6 months: BMI −1.9% vs +5.3%; LDL −7.3% vs +6.5%; HDL +12.3% vs +5.4%; FBS −3.8% vs +0.6%; testosterone −21% vs +3%; improved hirsutism only in study group	33	89.2	Some concerns
334	2025	ChiCTR2300076223	China	PCOS	Upper-middle-income	National Natural Science Foundation of China; Jiangxi Provincial Natural Science Foundation; National Key R&D Program; institutional funds	100	Parallel-group RCT	Single centre (Second Affiliated Hospital, Nanchang University)	Double-blind for probiotic/placebo; outcome assessors blinded	Computer-generated SPSS randomization	Sequentially numbered opaque sealed envelopes	No — per-protocol	Complete-case only; 4 withdrawals	At 1 month: ↓FPG (4.97 vs 5.53 mmol/L, p<0.001); ↓2h-PBG (6.75 vs 7.52 mmol/L, p<0.001); ↓HOMA-IR (3.35 vs 4.40, p<0.05). At 3 months: ↓AMH, ↓LH (p<0.05); greater weight loss (5.9 vs 4.7 kg, p=0.0076). Improved GI symptoms (diarrhea p<0.01).	29	78.4	Some concerns
335	2023	ISRCTN55983518	Turkey	PCOS	Upper-middle-income	Partogen İlaç (Turkey) – laboratory analysis costs; Parthenogen SAGL (Switzerland) – product developer	48	Parallel, open-label randomized controlled trial	Single-centre (Acibadem Fulya Hospital IVF Center, Istanbul)	Open-label (participants unblinded; assessors blinded)	Computer-generated block randomisation (block size 4)	Yes – independent assignment with sealed envelopes	No (per-protocol analysis)	Five dropouts; no imputation used	↓ FSH use (1650 IU vs 2250 IU; p=0.00002), ↑ estradiol (+22%), ↑ blastocyst rate (55% vs 32%; p=0.0009), trend ↑ implantation (64% vs 32%; p=0.06), ↑ clinical pregnancy (58% vs 33%; ns), ↓ follicular Hcy (7.6 vs 24.3 µmol/L; ns)	28	75.7	Some concerns
336	2021	CTRI/2018/05/013937	India	GDM	Lower-middle-income	No funding declared	100	Randomized controlled trial (open-label)	Single-centre (AIIMS New Delhi antenatal clinic)	Open-label	Computer-generated randomization table	Sequentially numbered opaque envelopes	Yes — intention-to-treat stated	One miscarriage excluded; otherwise complete-case; no imputation	Glycemic control: 89.8% vs 68% (RR 0.31; p=0.008). Insulin use: 6.1% vs 22% (p=0.02). Birthweight higher in controls (3037 g vs 2820 g; p=0.018). Other maternal/neonatal outcomes similar.	30	81.1	Some concerns
337	2008	ACTRN12607000636459	Poland	PCOS	High-income	State Committee for Scientific Research (KBN 2 P05E 034 28)	70	Prospective randomized controlled trial	Single university hospital IVF center	Not blinded (patients, clinicians, embryologists)	Computer-generated random letters (A/B assignment)	Yes – opaque sealed envelopes	No – all randomized patients analyzed	No missing data; all patients followed to outcome	MII oocyte rate: 82.3% vs 80.0% (p=0.903). Fertilization rate: 73.9% vs 85.7% (p=0.388). Implantation rate: 30% vs 30% (OR 1.02, 95% CI 0.52–1.98). Pregnancy per attempt: 61% vs 57% (p=0.810). Delivery per attempt: 42% vs 49% (p=0.481). Miscarriage: 18% vs 8% (p=0.154). Severe OHSS: 0% vs 5%. Stimulation days: 9 vs 11 (p=0.0005). Total FSH dose: 1,087.5 vs 1,275 IU (p=0.005). LH levels higher in …	26	70.3	High risk
338	2014	EudraCT 2006-001911-31	Austria	PCOS	High-income	No external funding; medication and placebo supplied by Kolassa & Merz GmbH	19	Randomized, double-blind, placebo-controlled trial with open-label extension	Single academic medical centre	Double-blind (participants and investigators)	Random number table	Sealed envelope; identical numbered blister packs	Not explicitly stated	One pregnancy excluded from follow-up; complete-case analysis	LH-stimulated testosterone AUC decreased significantly with metformin vs placebo (p=0.02); serum testosterone reduced after 12 weeks independent of insulin sensitivity	31	83.8	Some concerns
339	2024	NCT04714762	Finland	GDM	High-income	Business Finland; Helsinki University Hospital; Aalto University; University of Helsinki; Fujitsu Finland	148	Parallel-group RCT	Single-country (Helsinki metropolitan area clinics)	Open-label; nurses masked until allocation	Random permuted blocks stratified by gestational age, parity, BMI	Yes — opaque sequentially numbered sealed envelopes	Yes — ITT stated and applied	Minimal missing data; analysed to delivery or dropout	Fasting glucose change −0.15 mmol/L (p=.022); lower capillary fasting glucose; −1.3 kg GWG; −13.1% macrosomia (p=.036)	33	89.2	Some concerns
340	2011	NCT00151411	USA	PCOS	High-income	NIH Cooperative Reproductive Science Center grant; GCRC funding; no industry role	114	Randomized double-blind placebo-controlled trial	Two academic medical centers	Double-blind participants, investigators, assessors	Computer-generated, permuted blocks, stratified by center & prior metformin use	Yes – identical capsules & coded packaging via investigational pharmacy	Yes – ITT applied for all analyses	No imputation; analyses used available data	Ovulation rate ratio MET vs PBO: 2.5 (95% CI 0.9–6.6; p=0.07) for any ovulation; no difference in number of ovulations; significant ↓testosterone at 3 months only; MET ↓weight (−3.4 kg); MET ↑BMD; differing OGTT effects; no QOL differences	33	89.2	High risk
341	2011	ClinicalTrials.gov NCT00151411	United States (Tennessee, Pennsylvania, Virginia)	PCOS	High-income	not reported	22	Pilot, randomized, double-blind, placebo-controlled clinical trial (RCT)	Multicenter (Meharry Medical College & Penn State College of Medicine)	Double-blind (patients + investigators)	Computer-generated random number table with permuted blocks; stratified by centre and prior metformin exposure	Yes — identical metformin and placebo capsules prepared by investigational pharmacy	Yes — “all analyses followed the intention-to-treat principle”	not reported	- Primary outcome: No significant difference in serum testosterone at 6 months; metformin showed improvement at 3 months only - FAI improved at 3 and 6 months in MET group - Acne: significant reduction at all visits in MET group - No changes in weight, waist, BP, lipids, VO2max, ovarian volume - Bleeding episodes: no difference (RR = 1.7, P = 0.22) - Glucose AUC: decreased with lifestyle only, no…	31	83.8	Some concerns
342	2022	NCT03902301	Poland	PCOS	High-income	Not stated	40	Parallel-group RCT	University hospital outpatient clinic	Not blinded (dietary + probiotic intervention)	Simple randomization into diet vs diet+probiotic	Not described	No (per-protocol analysis of 40 completers)	No imputation; dropouts removed	Significant reductions in: body weight (≈−9.5% both groups), BMI, fat mass; acetic & butyric acids; total cholesterol, LDL-C, TG; HDL-C increased. No between-group differences (probiotic had no added effect).	27	73	High risk
343	2017	ISRCTN31072075	UK	PCOS	High-income	NIHR School for Primary Care (PhD fellowship)	40	Randomised feasibility and pilot RCT	Two private CHM practices	Practitioner and assessor blinded; participants blinded to treatment differences	Computer-generated sequence; irregular block allocation	Sealed opaque envelopes via independent herbal dispensary	Not explicitly ITT; feasibility study; analyses based on available data	Missing menstrual data for 3 participants; others analysed as available	Menstrual rate increased in both groups: +0.18 (p=0.0027) standardised, +0.27 (p<0.001) individualised; no between-group difference; Hirsutism improved −2.52 vs −1.44; WHR improvement favoured individualised (p=0.02); safety normal except 1 transient ALT rise	29	78.4	Some concerns
344	2023	NCT03955107	China	GDM	Upper-middle-income	National Natural Science Foundation of China; Shanghai Science & Technology Commission Foundation; SHDC Clinical Research Plan	154	Parallel-group RCT	Single centre (Shanghai General Hospital)	Open-label (participants and clinicians aware)	1:1 randomisation stratified by age (≤35, >35)	Not described	No ITT; per-protocol only	Missing data due to prematurity, referral, COVID; not imputed (19.4% loss)	Means/SDs, medians/IQRs, RRs, p-values, tables for all outcomes	30	81.1	High risk
345	2007	None reported	Greece	PCOS	High-income	None stated	78	Parallel RCT (1:2 allocation)	Single IVF unit	Unblinded (patients and physicians)	Computer-generated randomisation list; ratio 1:2	Not concealed (allocation by study nurse, not blinded)	No ITT; per-protocol analysis only	No missing data except embryo-transfer cancellations due to OHSS; complete-case	OHSS moderate–severe 11.5% vs 38.5% (P=0.02); E2 on Day 5: 432 vs 204 pg/mL (P<0.001); follicles ≥18 mm Day 8: 34.6% vs 1.9% (P<0.001); pregnancy rates similar (clinical 57.7% vs 61.5%)	26	70.3	High risk
346	2010	NCT00417144	Greece	PCOS	High-income	Not reported	220	Single-centre randomized controlled trial	IVF clinic (Eugonia-Iatriki Erevna IVF Center, Athens)	None (open-label); clinicians & patients unblinded; lab staff blinded for assays only	Computer-generated list (1:1)	Performed by study nurse; concealed prior to allocation	ITT approach used (all randomized analysed for primary outcome)	No imputation; complete-case; cycle cancellations minimal	Ongoing pregnancy 50.9% vs 47.3% (difference 3.6%, 95% CI –9.6 to +16.8); OHSS Grade II lower in antagonist (40% vs 60%, P<0.01); stimulation 10 vs 12 days; FSH dose 1575 vs 1850 IU (P<0.05)	28	75.7	Some concerns
347	2011	Chinese Clinical Trial Registry ChiCTR-TRC-09000670	China	PCOS	Upper-middle-income	Lee Hysan Foundation Research Grant; CUHK & RGC Direct Allocation Grant (Project 2041092). Drug supplied by GSK but with no role in design, analysis, or reporting.	70	Randomized, double-blind, placebo-controlled, parallel-group trial	Single tertiary referral centre.	Double-blind (participants and investigators).	Computer-generated block randomization (blocks of 10)	Yes – serially numbered identical bottles; codes concealed until study completion.	Yes (explicitly stated).	Sensitivity analysis assuming dropouts retained baseline menstrual status.	Menstrual cyclicity: Higher regular menses at 6 months (50.0% vs 11.8%, p = .02); trend at 12 months (41.7% vs 20.0%, p = .051). Hyperandrogenism: No significant changes in acne, hirsutism, total or free testosterone. Metabolic: ↓ fasting insulin and HOMA-IR; adverse lipid changes (↑ total and LDL cholesterol at 6 months).	25	67.6	Some concerns
348	2022	NMRR-15-2000-28718	Malaysia	GDM	Upper-middle-income	National Institute of Health Malaysia (BP005000)	650	Cluster randomized controlled trial	17 primary care clinics	Unblinded	District-level cluster randomisation, pair-matched, computer-generated	Yes, allocation concealed at district level	No (only complete-case analysis; defaulters excluded)	High attrition; analysis on those completing follow-up	T2DM incidence 20% vs 17% (p=.487) – no significant difference; some metabolic differences (DBP, triglycerides)	31	83.8	High risk
349	2014	gov NCT00719186	USA	PCOS	High-income	NICHD (various grants listed) and NIH translational science grants	750	Multicenter, double-blind, randomized controlled trial (RCT)	Single centre-Academic medical centers in the U.S.	Double-blind (participants, investigators, outcome assessors)	Random assignment in 1:1 ratio using permuted blocks of 2, 4, or 6	Over-encapsulated study drugs identical in appearance; blinding maintained	Yes, analyzed according to intention-to-treat principle	Dropouts excluded from further analysis; reasons reported	Live birth: 27.5% vs 19.1% (P=0.007), rate ratio 1.44 (95% CI 1.10–1.87); ovulation rate: 61.7% vs 48.3% (P<0.001)	34	91.9	Low risk
350	2014	NCT00719186	USA	PCOS	High-income	NICHD; NIH; multiple center grants	750	Double-blind RCT	11 academic reproductive medicine centers	Double-blind (participants & investigators); identical capsules	Permuted blocks of 2,4,6	Centralized over-encapsulation system	Yes — intention-to-treat	No imputation; complete-case within ITT	Live birth: 27.5% vs 19.1% (RR 1.44, 95% CI 1.10–1.87, p=0.007); Ovulation: 61.7% vs 48.3% (p<0.001); Pregnancy: 31.3% vs 21.5% (p=0.003); No difference in congenital anomalies (4 vs 1, p=0.65)	35	94.6	Low risk
351	2015	NCT00704912	USA	PCOS	High-income	NIH (NICHD, NCRR, NCATS)	149	Parallel-group RCT	Two academic medical centers	Open-label; lab staff blinded	Stratified block randomisation (site + BMI) using Excel; blocks of 2, 4, 6	Independent biostatistician; sequence concealed from investigators	Yes—primary analysis included all randomized	Complete-case; drop-outs reported; no imputation	Weight loss: Lifestyle −6.2% (95%CI −7.4 to −5.0), Combined −6.4% (−7.6 to −5.2), both P < 0.001 vs OCP. Metabolic syndrome ↑ in OCP arm (OR 2.47). Ovulation: OCP 46%, Lifestyle 60%, Combined 67% (P < .05). Live birth: OCP 12%, Lifestyle 26%, Combined 24% (NS).	36	97.3	High risk
352	2021	not mentioned	Australia	PCOS	High-income	Austrian Science Fund (FWF), Project No. KLI 274	330	Randomised placebo-controlled clinical trial	single centre	Appears double-blind (not explicitly stated in this section)	2:1 (Vitamin D:placebo) — method not described	not reported	Yes — used for participants with baseline and follow-up data.	Not reported	PCOS women: • Significant Vitamin D effect on FSH (p = 0.031) • Significant reduction in LH/FSH ratio (p = 0.022) • No change in AMH or other hormones • Vitamin D increased 25(OH)D significantly (p < 0.001) • Positive correlation between Δ25(OH)D and ΔLH/FSH Non-PCOS women: • No significant endocrine effects • Vitamin D increased 25(OH)D significantly (p < 0.001)	32	86.5	Some concerns
353	2020	ChiCTR-TRC-13003642	China	PCOS	Upper-middle-income	Not reported (no conflicts disclosed)	204	Randomized controlled trial (open-label)	Single tertiary teaching hospital	None (open-label)	Computer-generated block randomization (1:1:1); block size 6 or 10	None (open-label; no blinding)	Yes – ITT used for all randomized participants	Complete-case with ITT; withdrawals documented but no imputation	Weight change: −6.81 kg (MET1500) vs −3.40 (ROS) vs −3.54 (COMBO); HOMA-IR reduced similarly across groups (approx −1.76 to −1.87); rosiglitazone groups showed greater TC/TG reductions; testosterone decreased most in COMBO group	33	89.2	Some concerns
354	2020	NCT01565564	China	GDM	Upper-middle-income	National Key R&D Program of China; BRIDGES (IDF + Lilly Diabetes)	700	RCT-based economic evaluation	Multilevel (primary, secondary, tertiary hospitals)	Unblinded	Simple randomization without replacement using pre-generated list	None (staff at some sites not separated initially)	Yes (explicit)	Routine records; questionnaire recall for some costs	SC reduced macrosomia 11.2% vs 17.5% (p=0.019); LGA 13.0% vs 19.9% (p=0.013); NNT = 16 (macrosomia), 14 (LGA); incremental cost ¥1,877–2,056; cost per case prevented ¥26,278–32,896	23	62.2	High risk
355	2021	Not specified	China	GDM	Upper-middle-income	China Medical Board (Grant 16-256); Innovation-Driven Project of Central South University (2018CX037)	404	Cluster-randomised controlled trial	Multicentre (two rural counties: Youxian and Yongding)	Single-blind (assessors blinded; participants unblinded)	Cluster randomisation by town (via online random number generator)	Yes – randomisation by independent biostatistician	No – per-protocol	17% attrition; 37 excluded for incomplete dietary data; no imputation	↑ CHEI score (62.2 vs 58.9, p=0.001); ↑ MDD-W (90.6% vs 81.2%, p=0.023); ↓ CHO intake (223.5 vs 239.6 g, p=0.038); CHEI ↑ +1.5 pts (GLMM p=0.049)	31	83.8	High risk
356	2021	ChiCTR190002220	China	PCOS	Upper-middle-income	Guangdong provincial science programs; TCM bureau projects	70	Randomized controlled trial (parallel)	Single center (Yuebei People’s Hospital, Guangdong)	Open-label	Pseudorandomization by order of hospital visit (even = treatment; odd = control)	None; open allocation	No—per-protocol only (51 completed)	Dropouts excluded; no imputation	Puerarin effects: ↑SHBG (p<0.01), ↑SOD (p<0.01) in both obese & lean; obese: ↓SBP (p=0.048), ↓TC (p=0.032), ↓T (p=0.003). Lipids: TG ↓ only in obese puerarin group. Antioxidants: ↑SOD, ↑VE, ↑VC across treatment groups (Table 3).	27	73	High risk
357	2022	NCT03232281	China	Endometriosis	Upper-middle-income	Ipsen	300	Phase 3 RCT (open-label, active-controlled, parallel-group)	24 hospital centers in China	Open-label (due to different injection frequency)	1:1 randomization using interactive web response system	Yes – central automated system	FAS and PP both analyzed; primary endpoint PP	PP analysis excludes major deviations; FAS required baseline + post-baseline data	Week-12 castration rate: 98.6% vs 99.3% (rate diff −0.7%, 95% CI −4.41 to 2.58). Pain reduced similarly in both groups. LH/FSH/E2 suppressed comparably. Median menses return: 179 d (PR3M) vs 85 d (PR1M). No new safety signals.	35	94.6	Some concerns
358	2023	NCT03125304	China	Endometriosis	Upper-middle-income	National Administration of TCM (jdzy2015065); Jiangxi Clinical Research Centre for Obstetrics and Gynecology Diseases of TCM (20181BCG42003); Liang Ruining's National Famous and Old Experts Inheritance Studio of TCM ([2022]75); Research Grant Council Collaborative Research Fund (C4072-22G); Jiangxi University of Chinese Medicine Science and Technology Innovation Team Development Program (CXTD2201…	106	Multicenter, randomized, single-blind, placebo-controlled	4 tertiary hospitals in Jiangxi and Hainan provinces	Participants and data collectors blinded; acupuncturists not blinded	Computer-generated permuted block randomization (block size = 4), stratified by study site	Sequentially numbered opaque envelopes	Yes	Missing data handled via sensitivity analyses, including multiple imputation (100 imputations)	Dysmenorrhea significantly reduced at week 12 in acupuncture group; duration of pain shortened; improved emotional state, quality of life, patient satisfaction; no differences in nonmenstrual pelvic pain or dyspareunia; no severe adverse events	34	91.9	Some concerns
359	2025	Not listed (no registry reported in article)	China	PCOS	Upper-middle-income	Natural Science Foundation of Hubei Province (2023AFB506)	174	Randomized controlled trial (parallel)	Single tertiary centre (Wuhan Union Hospital)	Open-label for clinicians/patients; sonographers/statisticians blinded	Computer-generated random number table	Sealed opaque envelopes	Yes – ITT and PP reported	Lost-to-follow-up counted as non-pregnant in ITT; no imputation	Ovulation: 85.1% vs 85.1%; Ongoing pregnancy: 33.3% vs 25.3%; Endometrial type B higher in 2.5 mg group (88.5% vs 69%); Monofollicular rate higher in 2.5 mg group (67.8% vs 46.0%); OHSS only in 5 mg group (3 cases)	32	86.5	Some concerns
360	2025	Not registered	China	Endometriosis	Upper-middle-income	No external funding (authors report “None”)	150	Randomized controlled trial (single-blind)	Single tertiary teaching hospital (Third Affiliated Hospital of Sun Yat-sen University)	Single-blind (data analysts blinded only)	SPSS-generated random number table	Not explicitly reported	Yes – all patients included in final analysis	Dropouts documented; last evaluable data collected; no imputation described	No significant differences in VAS at 6h (p=0.20), Day 1 (p=0.438), Day 3 (p=0.714), Day 7 (p=0.899); No significant differences in GAD-7 Day 1 (p=0.541), Day 3 (p=0.287), Day 7 (p=0.468)	28	75.7	High risk
361	2014	ISRCTN24242218	United Kingdom	Endometriosis	High-income	Research fund from the Gynaecology Ultrasound Centre, London; some honoraria/consultancies disclosed	55	Double-blind randomized within-patient controlled RCT	Tertiary Endometriosis Centre (University College London Hospital)	Double-blind: patients and ultrasound assessors blinded; surgeons could not disclose allocation	Block randomisation with varying block sizes; Stata command ralloc	Sequentially numbered, opaque, sealed envelopes opened by anaesthetist; surgeons only knew the side	Not ITT; paired within-subject final analysis on 52 women	3 excluded (pregnancy, lost to follow-up, bowel injury); no imputation	Adhesions: 38.5% suspended vs 51.9% unsuspended (OR 0.56; 95% CI 0.22–1.35; P=0.23). Moderate–severe adhesions: 9.6% vs 19.2% (P=0.23). Pain: large postoperative reductions (P<0.001) regardless of suspension.	33	89.2	Some concerns
362	2019	Not reported	China	PCOS	Upper-middle-income	National Natural Science Foundation of China (81560783); Jiangxi Province Science & Technology Plan (20141BBG70056)	100	Randomized double-blind placebo-controlled trial	Two affiliated university hospitals	Double-blind (participants and investigators)	1:1 random allocation	Not explicitly described	Not explicitly stated	Complete-case analysis; 5% lost to follow-up	BMI: 23.30±2.26 → 21.48±1.73 vs placebo 23.28±1.84 → 22.81±1.69 (p<0.05 between groups). WHR: 0.84±0.04 → 0.79±0.04 vs 0.84±0.06 → 0.81±0.06 (p<0.05). LH: 11.50±5.58 → 7.61±3.11 vs 11.78±4.82 → 10.99±3.21 (p<0.05). Testosterone: 0.60±0.21 → 0.29±0.12 vs 0.60±0.17 → 0.57±0.14 (p<0.05). FBG: 4.92±0.62 → 4.71±0.53 vs 5.01±0.66 → 4.96±0.53 (p<0.05). FINS: 15.51±5.91 → 9.68±3.13 vs 15.30±5.47 → 13.97±…	30	81.1	Some concerns
363	2024	ACTRN12621000153819	Australia	PCOS	High-income	Australian Government Medical Research Future Fund (APP1200392)	35	Single-blinded, randomized, controlled crossover feeding trial	Monash University, Melbourne	Participants and statistician blinded; researchers not blinded	Independent randomisation sequence 50:50 ratio via randomizer.org, no blocking	Concealed by crossover design; participants blinded to diet type	yes	Linear mixed-effects models (lme4), 2-way ANOVA, chi-square, Fisher's exact, Wilcoxon signed-rank, Friedman's test; R 4.0.2, GraphPad Prism 10	21/35 (60%) responded to low FODMAP vs 9/35 (26%) to control (p=0.034 ITT); end-of-study overall symptom scores reduced 40 mm (low FODMAP) vs 57 mm (control), p=0.035; stool form normalized on 71% of days low FODMAP vs 43% baseline and 56% control; improvements in abdominal pain, bloating, diarrhea, gastroesophageal reflux, QOL, and depression in those with baseline abnorm	24	64.9	Some concerns
364	2021	ClinicalTrials.gov NCT03324737	Singapore	GDM	High-income	National Medical Research Council (Health Services Research Grant, Singapore)	200	Parallel, open-label randomized controlled trial	Single-centre (National University Hospital, Singapore)	Open-label (participants and assessors unblinded)	Random permuted block design (block size 4)	Yes – sealed opaque envelopes by independent researcher	Yes – intention-to-treat	Complete-case analysis; no imputation; 95% retention	Optimal weight achieved: 40% vs 30% (OR 1.40, 95% CI 0.76–2.58, p=0.27); ↓ caloric intake (−614 kcal/day, p<0.001); ↑ health behaviors (heiQ +0.16, p=0.045); ↑ distress scores (+0.21, p=0.01); 60.8% app engagement at 4 months	29	78.4	Some concerns
365	2020	Not registered	China	GDM	Upper-middle-income	None reported	281	Parallel RCT	Single-centre (Women & Children’s Hospital, Xiamen University)	Not blinded	Computer-generated randomisation schedule	Not described	No	Complete-case analysis only	GDM incidence: 14.4% vs 24.6% (p=0.03). Excessive GWG: 25.9% vs 47.9% (p=0.03). CS: 35.3% vs 47.9% (p<0.01). PIH: 3.6% vs 10.6% (p=0.03). PROM: 6.5% vs 15.5% (p=0.02). APH: 5.0% vs 16.2% (p<0.01). PPH: 3.6% vs 14.1% (p<0.01). Logistic regression: intervention reduced risk of GDM (OR 0.45), excessive GWG (OR 0.42), PIH (OR 0.34), PROM (OR 0.50), APH (OR 0.22), PPH (OR 0.28).	26	70.3	Some concerns
366	2008	Not registered	Sweden	PCOS	High-income	Family Planning Foundation; Uppsala University Hospital Development Fund; Visare Norr; Abbott Scandinavia (unrestricted small grant; no involvement)	42	Randomized, double-blind, placebo-controlled, multicenter parallel-group trial	Multicenter (primary care + referral centers + private practices)	Double-blind (participants & investigators)	Pharmacy-generated randomization; identical capsules	Central pharmacy concealed allocation; identical capsules	Not formally; last-observation-carried-forward used; per-protocol analysis	LOCF applied; 4 pregnancies + 4 dropouts; 1 placebo removed for binge-eating	Weight loss: 7.8 ± 5.1 kg vs 2.8 ± 6.2 kg (p<.01). BMI ↓: F(1,30)=11.18, p<.01. Significant decreases in triglycerides, ApoB, ApoB/ApoA ratio, cystatin C, FAI; SHBG ↑ (Table 3). Waist/hip circumferences ↓ significantly in sibutramine group. No BP increase.	27	73	Some concerns
367	2015	ISRCTN97241163 Part B	Ireland	GDM	High-income	National Maternity Hospital Medical Fund; Ivo Drury Award; EU FP7 grant 289346	149	Double-blind RCT	Single tertiary maternity hospital	Double-blind (participants, clinicians, lab staff)	Computer-generated simple randomisation (1:1)	Sequentially numbered, sealed opaque envelopes	Yes	Multiple imputation for missing glucose; per-protocol excluding pharmacologic therapy	Fasting glucose: both groups ↓ but no difference (4.65 vs 4.65 mmol/L); Pharmacotherapy: 17% vs 14% (NS); Lipids: attenuated rise in total cholesterol (+0.27 vs +0.50 mmol/L, p=.031) & LDL (+0.08 vs +0.31 mmol/L, p=.011); Birthweight 3.57 vs 3.60 kg (NS)	25	67.6	Some concerns
368	2017	ChiCTR-TRC-11001821	China	PCOS	Upper-middle-income	Not reported	268	Prospective randomized controlled trial (4-arm parallel)	Single tertiary hospital (West China Second University Hospital)	No blinding of participants or clinicians reported	Random numbers created via SPSS; allocation by order of inclusion	Not explicitly described; likely envelope system but not stated	No—per-protocol analysis (excluded dropouts)	Dropouts removed; no imputation; reasons for dropout documented	Ovulation: LE > CC (73.3% vs 52.7%, p<0.001). Pregnancy: LE > CC (52.1% vs 39.7%, ns). Live birth: LE > CC (35.3% vs 26.4%, ns). Miscarriage: CC lower (13.2% vs 16.8%, ns). CC-resistance: 7.5%.	31	83.8	High risk
369	2018	NCT01554358	China	GDM	Upper-middle-income	EFSD/Chinese Diabetes Society/Lilly; Tianjin Health Center; NIH (R01DK100790, U54GM104940)	1180	Randomized controlled trial	Multi-district urban health centers	Single-blind (blinded assessors & analysts)	Computer-generated 1:1 randomization; central allocator independent	Yes — centrally held list	Yes (stated)	Imputation used for weight regain: 0.3 kg/month; ITT with truncation; zero-change imputation for control and missing	Intervention: −0.82 kg vs −0.09 kg (P=0.001); Waist −1.76 vs −0.73 cm (P=0.003); Body fat −0.50% vs +0.05% (P=0.001)	29	78.4	Low risk
370	2021	ClinicalTrials.gov NCT04216485	China	PCOS	Upper-middle-income	National Key Research and Development Program of China (2016YFC1000304), Beijing Hospitals Authority’ Ascent Plan (DFL20191402), Beijing Natural Science Foundation (S160001), Beijing Municipal Science & Technology Commission (Z161100000516160)	296	Randomized Controlled Trial (RCT)	Single-centre (Beijing Obstetrics and Gynecology Hospital, Capital Medical University)	not reported	not reported	not reported	es, results presented for ITT population (intervention N=164, control N=132)	not mentioned	Means ± SD, n (%), p-values; significant differences noted for GWG (per-protocol) and C-section rate (per-protocol)	27	73	High risk
371	2021	Dutch Trial Register NTR2450	Netherland	PCOS	High-income	Not funded	183	Randomized controlled trial (three-arm parallel design)	Single centre (tertiary university hospital – Erasmus MC, Rotterdam)	Open-label	Computer-generated random numbers table (1 : 1 : 1 allocation)	Not explicitly stated	Multilevel logistic & linear regression (mixed models) with bootstrap (10 000 samples) for non-normal data; SPSS v25 and SAS v9.4 used; α = 0.05	Analyses based on intention-to-treat principle	Mixed modelling used to handle missing values and unbalanced time points	34	91.9	High risk
372	2011	ACTRN12608000218392	Australia	GDM	High-income	Australian National Health and Medical Research Council (Project Grant ID632889)	99	Parallel, two-arm randomized controlled trial	Single-centre (Royal Prince Alfred Hospital, Sydney)	Participants and investigators blinded except study dietitian	Computer-generated randomization stratified by BMI (<30 vs ≥30) and gestational age (<28 vs ≥28 weeks)	Yes – sequence concealed from recruiter; dietitian aware post-allocation	Yes	Excluded preterm (<37 wks) and early withdrawals; no imputation	No sig. diff. in birth weight (3.36 vs 3.36 kg, p=0.619); macrosomia 2.1% vs 6.7% (p=0.29); insulin use 53% vs 65% (p=0.25); excessive weight gain 25% vs 42% (p=0.10); both diets achieved low GI (~47 vs 53)	28	75.7	Some concerns
373	2008	Not reported	Italy	Endometriosis	High-income	Not reported	60	Randomised controlled trial	Single-centre (University of Bari)	Participants blinded (placebo saline injections), clinicians not blinded	Computer-generated randomisation table	Serially numbered opaque sealed envelopes	Not explicitly	6 lost to follow-up; no imputation	RR values for pain (0.94), pregnancy (0.81), relapse (1.29); Kaplan–Meier curves reported	30	81.1	Some concerns
374	2018	Not reported	China	Endometriosis	Upper-middle-income	Leading Project of Science and Technology Commission of Shanghai Municipality (Grant No. 134119a8000)	280	Randomized controlled trial (parallel)	Single tertiary reproductive medicine centre	Open-label	Randomized 4:3 allocation ratio	Not described	Not explicitly stated	Non-adherence reported; complete-case analysis	Clinical pregnancy rate: 39.4% (54/137) VitC vs 33.3% (36/108) no treatment (NS). Implantation rate: 28.0% vs 23.1% (NS). High-grade embryo rate: 66.8% vs 58.3% (P<0.05 vs control; NS vs VitC). Retrieved oocytes: 7.4±3.7 vs 7.3±4.0 (NS). Serum/FF VitC levels: significantly increased after VitC (P<0.05). ROS, MDA, SOD, TAC: no significant change after VitC supplementation.	26	70.3	High risk
375	2020	ChiCTR-IOR-17010729	China	PCOS	Upper-middle-income	National Key R&D Program (2016YFC1000205); National Natural Science Foundation of China (81701403 & 81871159)	343	Parallel 1:1 open-label RCT	Single university-affiliated reproductive centre	Open-label; outcome verification via ultrasound + follow-up	EPICALC 2000-generated sequence	Opaque sealed envelopes handled by independent nurse	Yes — full ITT	Nearly complete follow-up (95.6% completed); no imputation stated	Live birth: 49.4% vs 53.8% (RD −4.4%, 95% CI −10.8 to 2.0, p=0.45); Clinical pregnancy: 63.4% vs 64.9% (p=0.82); Costs significantly higher: 7799.2 vs 4438.9 RMB (p<0.001); Cost per live birth: 15,663 vs 8,189 RMB (p<0.001)	31	83.8	Some concerns
376	2011	ISRCTN33885819	Finland	GDM	High-income	Finnish Diabetes Research Fund; Pirkanmaa Hospital District; Academy of Finland; Finnish Ministries of Education & Social Affairs/Health	399	Cluster-randomised controlled trial	Multi-centre (14 municipalities)	None (open-label); outcome assessors not explicitly blinded	Municipalities pair-matched and computer-randomised	Not blinded; usual care nurses aware of status	Yes (intention-to-treat)	Outliers removed; otherwise complete-case	GDM incidence: 23.3% vs 20.2% (NS). Birthweight: lower in intervention (−133 g; p=0.008). LGA: 12.1% vs 19.7% (p=0.042). Improved dietary patterns (↑PUFA, ↑fiber, ↓sat fat, ↓sucrose). MET-minutes decrease smaller in intervention.	35	94.6	Some concerns
377	2009	ClinicalTrials.gov NCT00428311	Spain	PCOS	High-income	Spanish Ministry of Health & Consumer Affairs (Instituto de Investigación Carlos III); Hospital Ramón y Cajal	34	Randomized clinical trial (open-label)	Academic hospital (endocrinology & vascular surgery units)	Open-label	Block randomization (blocks of 10) using sealed opaque envelopes	Yes – sealed opaque envelopes	Yes – ITT performed due to dropout	ITT assumed no change for missing data	Metformin reduced daytime & 24-h systolic/diastolic BP; Diane-35 increased BP; both normalized mean CIMT vs controls	29	78.4	High risk
378	2023	Not reported	Australia	Endometriosis	High-income	Caring Futures Institute, Flinders University	22	Pilot 3-arm RCT	Single academic research center (Flinders University)	No blinding (exercise modality obvious)	Randomized, stratified by age; random permuted blocks	Not described	No (per-protocol n=19)	One dropout removed; no imputation	No significant between-group difference (p=0.45). Pain increased least in intervention groups: Telehealth +10 ± 12 mm; VR +9 ± 24 mm; Control +16 ± 12 mm. Medium–large effect size η²=0.10.	23	62.2	High risk
379	2014	Not reported	China	GDM	Upper-middle-income	Science and Technology Program of Guangdong Province, China (Grant 2006B36005013)	95	Parallel RCT	Single maternal primary care clinic	Not blinded (dietary intervention behavioural); lab staff blinded	Odd/even Excel-generated random numbers	None used	Modified ITT applied (participants completing follow-up)	12 dropouts; complete-case; no imputation	FPG change −0.33 vs −0.02 mmol/L (P<0.01); 2h-PG −2.98 vs −2.51 (P=0.003); TC +0.12 vs +0.23 mmol/L (P<0.01); TAG +0.41 vs +0.56 (P<0.01); HDL-C −0.01 vs −0.11 (P<0.01); no differences in birthweight or maternal–fetal outcomes	28	75.7	High risk
380	2021	NCT04029272 (ClinicalTrials.gov)	China	PCOS	Upper-middle-income	NR	50	Open-label parallel-group randomized controlled clinical trial	Single centre	None – open-label study.	“Simple computer-generated randomization”; “two-block randomization technique.”	NR	Yes—authors explicitly state: “The intention-to-treat (ITT) analysis included all 50 randomized participants.”	NR	COM vs MET: • Weight loss: 3.8 ± 2.4 kg vs 2.1 ± 3.0 kg (p=0.045). • BMI reduction: −1.40 vs −0.77 (p=0.041). • Waist circumference: −4.63 vs −1.72 cm (p=0.023). • FPG reduction: significant in COM (p=0.023), not in MET. • OGTT 2-hr glucose ↓ more in COM (p<0.001). • OGTT 2-hr insulin ↓ significantly in COM (p=0.001), not MET. • Matsuda index ↑ in COM only (p=0.033). • Testosterone ↓ in both; no …	29	78.4	High risk
381	2018	NCT01916694	United Kingdom	GDM	High-income	NIHR Oxford Biomedical Research Centre (UK government research funding)	206	Individually randomized controlled trial	Single large tertiary referral centre (Oxford University Hospitals)	Open-label for participants & clinicians; labor ward & neonatal staff blinded	Minimization randomisation using Sortition (balances ethnicity, BMI, gestational age)	Yes—opaque sealed envelopes used for assignment	Yes—explicit ITT analysis conducted	Missing data excluded (listwise); no imputation	Means, SDs, ORs, 95% CIs, p-values; HbA1c trajectories; mean daily glucose; compliance metrics; cost tables	34	91.9	Some concerns
382	2023	gov NCT03766256	USA	GDM	High-income	National Institute of Diabetes and Digestive and Kidney Diseases (NIDDK)	310	Pragmatic RCT, multicenter	Two healthcare systems (UCLA & Intermountain)	Participants not blinded; investigators and outcome assessors blinded.	Block randomization, stratified by health system, 1:1	not mentioned	Yes (intention-to-treat planned)	Multiple imputation; joint models if missing-not-at-random suspected	not provided	32	86.5	Some concerns
383	2018	Not reported	Morocco (with donor CGC/HFF from France)	PCOS	Upper-middle-income	None declared	47	Randomized controlled trial	University-affiliated private IVF centers	No blinding	Randomized allocation to the four IVM protocols; method not described	Not described	No ITT; per-protocol analysis on oocytes collected	Complete-case only; no imputation	HFF/CGC-IVM: maturation 79%, cleavage 71%, blastocyst yield 27%; vs S-IVM yield 2%; AFF-IVM yield 2%; HFF-IVM yield 12%. Significant differences for maturation, cleavage, and top-quality blastocysts (p<0.001 across groups).	24	64.9	High risk
384	2015	NCT02280057	Denmark	PCOS	High-income	No specific funding reported	60	Randomized, double-blind, placebo-controlled cross-over trial	singel centre- Hospital (Department of Gynecology & Obstetrics, Holstebro and Aarhus University Hospital labs)	Double-blind (participants and investigators)	Randomized sequence reported; specific randomisation algorithm/method not described in paper	not reported	60 randomized; 4 dropped out before treatment start; analysis performed on 56 — intention-to-treat not explicitly declared; analysis uses available paired samples (appears closer to per-protocol/available data)	Some missing AMH samples; missingness acknowledged but detailed imputation or methods to handle missing data not reported	Overall median AMH: metformin M1→M4 49.5→46.9 pmol/L (5.3%, p=0.81). Placebo P1→P4 51.7→39.9 pmol/L (22.8%, p=0.71). In obese subgroup, paired metformin–placebo difference at 6 months: absolute decrease 9.3 pmol/L (p=0.03). Medians, IQRs and p-values presented.	26	70.3	Some concerns
385	2015	Not reported	Egypt	PCOS	Lower-middle-income	None stated; no conflicts reported	120	Randomized controlled clinical trial	Single academic infertility center (Kasr El Aini Hospital, Cairo University)	Open-label (no blinding reported)	Sealed opaque envelopes with random-generated numbers	Yes – sealed opaque envelopes	No ITT; per-protocol only	Excluded dropouts; missingness minimal; no imputation	NAC improved outcomes:• Dominant follicles ≥18 mm: 2.25 vs 1.75 (CC) vs 1.89 (CC+met), p=0.02–0.04• Peak endometrial thickness: 7.3 mm vs 5.4 (CC) & 5.3 (CC+met), p<0.001• Pregnancy rate per patient: 20% vs 10% & 10% (p=0.05)No difference in pregnancy per cycle (NS).	27	73	High risk
386	2024	IRCT20221017056209N1	Iran	PCOS	Upper-middle-income	Gonabad University of Medical Sciences (Grant number 1195)	116	Randomised controlled clinical trial (parallel-group)	Multi-centre within Gonabad (private and public gynecology clinics)	Only statistical analyst blinded (single-blind)	Block randomisation (permutation blocks of size 2 and 4), generated via SealedEnvelope.com	Sequentially numbered, opaque, sealed envelopes	Not performed	Missing data not analysed. Questionnaires of dropouts were accidentally discarded → only per-protocol analysis performed.	Significant reductions in: Ovarian volume (right p=0.002; left p=0.010) Endometrial thickness (p=0.002) Serum testosterone (p=0.001) LH (p<0.001) Hirsutism score (p<0.001) Menstrual irregularities significantly improved in Nigella group (p<0.001) Non-significant: DHEA, DHEA-S.	25	67.6	High risk
387	2023	ClinicalTrials.gov NCT04422821	Poland	GDM	High-income	None declared	100	Parallel randomised controlled trial	Single-centre (Medical University of Warsaw)	Open-label	Simple randomisation (1:1) using computer-generated list	Yes – by independent person not involved in trial	Not explicitly stated (but 99/100 analysed)	Complete-case; no imputation	No diff. in mean fasting glucose (p=0.437); lower postprandial in control (p=0.011); FGM reduced delta fasting (p=0.027) & postprandial glucose (p=0.034); macrosomia 4% vs 20% (OR 5.62, 95% CI 1.16–27.2)	31	83.8	Some concerns
388	2023	IRCT20110826007418N7	Iran	PCOS	Upper-middle-income	Tabriz University of Medical Sciences	84	Parallel-group RCT	Single-center gynecology & infertility clinic (Al-Zahra Hospital)	No blinding possible (behavioral intervention); analysts unblinded	Block randomisation with block sizes 4 & 6; independent sequence generation	Opaque sealed envelopes	Yes — ITT stated and applied	No dropouts; all 84 analyzed	Depression MD −18.6 (95% CI −19.4 to −17.8, p<0.001). State anxiety MD −15.3 (95% CI −16.2 to −14.3). Trait anxiety MD −15.0 (95% CI −16.0 to −13.9). QoL improved MD +19.2 (95% CI +17.6 to +20.8). All p<0.001.	33	89.2	High risk
389	2018	IRCT20170513033941N24	Iran	GDM	Upper-middle-income	Arak University of Medical Sciences	60	Randomized, double-blind, placebo-controlled	Single centre (Arak University of Medical Sciences)	Double-blind (participants + researchers)	Stratified randomization by age & BMI; computer-generated	Yes — concealment by independent staff	Not stated	Not reported	Significant ↓ FPG (−5.2 mg/dL), ↓ insulin (−2.93 μIU/mL), ↓ HOMA-IR (−0.78), ↑ QUICKI; ↓ TG (−50.3 mg/dL), ↓ VLDL, ↓ LDL, ↓ TC; no HDL change	29	78.4	Some concerns
390	2025	IRCT201504146917N2	Iran	PCOS	Upper-middle-income	Iran University of Medical Sciences Grant 94–03-28-26521	70	Randomized placebo-controlled trial (parallel)	Gynecology clinics of Iran University of Medical Sciences	Double-blind (participants, outcome assessors, statistician)	Simple randomization using computer-generated table	Sealed opaque envelopes; identical capsules; coding concealed from research staff	Yes – ITT used for primary outcomes	Missing values checked; those with valid data included; no imputation described	TG significantly ↓ (MD −17.25; p=0.048); MDA significantly ↓ (MD −3.44; p=0.019); Mixed-model: significant differences for TG (p=0.000), HDL-C (p=0.047), TG/HDL-C (p=0.000), MDA (p=0.000), TAC (p=0.024)	30	81.1	Low risk
391	2016	Not registered	USA	PMDD	High-income	Intramural Research Program of NIMH, NIH; dutasteride supplied by GlaxoSmithKline	32	Randomized double-blind placebo-controlled cross-over trial with two separate dose-arms (0.5 mg and 2.5 mg)	Single centre (NIMH, NIH Clinical Center)	Double-blind (participants, investigators, clinicians)	Two random-number lists, blocked in sets of four separately for PMDD and controls; cross-over design	Double-blind; drug vs placebo identical; sealed codes	No — complete-case only; cross-over cycles analyzed per protocol	Participants with missing luteal progesterone excluded from hormone analyses but retained in symptom analyses; no imputation	High-dose dutasteride significantly reduced core PMDD symptoms: irritability (p=0.04), sadness (p=0.04), anxiety (p=0.03), bloating (p=0.03), food cravings (p=0.02). Prevented luteal rise in allopregnanolone (placebo +171% vs dutasteride −13%). 6/8 no longer met PMDD criteria on high-dose. No symptom effects in controls.	35	94.6	Some concerns
392	2015	Not reported	Egypt	PCOS	Lower-middle-income	Not reported	60	Randomized controlled trial	Two centres: Faculty of Nursing + Obesity Clinic, Mansoura University	Unblinded	Block randomization, block size 5	None described	No	All participants completed; no missing data	Weight: −7.1 kg vs no change (p=.041); BMI 33.2 vs 35.7 (p=.028); WC: 96.3 vs 103 (p=.029); hirsutism: 14.6 vs 18.2 (p=.013); menstrual episodes: 3.1 vs 2.3 (p=.010)	22	59.5	High risk
393	2011	ClinicalTrials.gov NCT01058772	Italy (with sites in Israel, Slovenia, Sri Lanka, and others)	GDM	Mixed Income	Institute for Maternal and Child Health – IRCCS Burlo Garofolo (Trieste, Italy)	1760	Multicentre, open-label randomized controlled trial	Multicentre (9 hospitals: 5 Italy, 4 abroad)	Open-label (participants and clinicians unblinded; assessors partially blinded)	Computer-based centralized randomization, blocked by centre (block size 10)	Yes – sealed opaque envelopes, sequentially numbered	Yes – intention-to-treat	Not specified; sensitivity analyses planned for dropouts	Expected 6% absolute reduction in C-section (31% → 25%, power 80%, α=0.05); per-protocol secondary outcomes to include neonatal hypoglycemia, macrosomia, and trauma	28	75.7	Some concerns
394	2006	None reported	Greece	PCOS	High-income	Not specified	36	Prospective randomized clinical trial	University hospital outpatient gynecology clinic	Hirsutism assessors blinded; otherwise unblinded	Computer-generated random numbers	Not described	No ITT; all participants completed	Complete-case; no imputation needed	HOMA-IR: ↑ significantly in both groups (p<.05). Fasting glucose-to-insulin ratio: ↓ significantly in cyproterone group only. Insulin sensitivity index: ↓ significantly only in cyproterone group. 1st & 2nd phase insulin secretion (PHIS): ↑ significantly only in cyproterone group (p<.05). AUCI (insulin): ↑ significantly only in cyproterone group (Table 2).	27	73	Some concerns
395	2013	NCT01342874	Italy	GDM	High-income	Folic acid + inositol sachets supplied by Italfarmaco SpA (no role in study conduct); no other external funding	75	Randomized, double-blind, placebo-controlled trial	High-Risk Pregnancy Unit, University “G. d’Annunzio” Chieti	Double-blind (participants + providers)	Simple computer-generated random sampling	Pharmacist prepared identical sachets; sealed, numbered; only pharmacist unblinded	Yes, ITT used for all primary and secondary outcomes	2 lost to follow-up; no imputation; compliance very high (>95%)	Primary outcome: Abnormal OGTT: 71% control vs 6% myo-inositol (RR 0.127; 95% CI 0.032–0.502; P=0.001). BMI gain: 3.8 vs 2.3 kg/m² (P=0.001). Neonatal hypoglycemia: 26% control vs 0% MI (P=0.038). Fetal AC percentile: 65.6 vs 41.7 (P=0.001). Gestational age at delivery: 37.2 vs 39.3 weeks (P=0.001).	34	91.9	High risk
396	2020	NCT01288638	Canada	PCOS	High-income	Agriculture and Agri-Food Canada (Growing Forward II Pulse Science Cluster G00011676); Saskatchewan Pulse Growers G00014962; Canada Foundation for Innovation (29638); Saskatchewan Health Research Foundation	95	Randomized controlled trial (parallel, stratified)	Single academic centre	Single-blind: assessors blinded to diet allocation	Computer-generated block randomization (block size 4), stratified by metformin use	Allocations emailed; participants not blinded to diet group	Not stated	Only women completing DXA included (31 TLC; 29 pulse); no imputation	Time effects: ↓BMI (p=0.005), ↓fat mass (p=0.0016); ↑lumbar spine BMD/BMC; ↓femoral neck BMD (p=0.016); pulse group ↑FS SPW (group×time p=0.032); no differences in lean mass	29	78.4	Low risk
397	2012	ACTRN12608000280303	Australia	GDM	High-income	Diabetes Australia Research Trust; NHMRC Career Development Award	28	Pilot randomized controlled trial	Single tertiary maternity centre (Mater Mothers Hospital + University of Queensland)	Open-label	Random allocation after baseline visit; method not fully described	Not explicitly described	No	Complete-case (n=25); dropouts excluded	Planned physical activity ↑60 min/wk (0–540) vs 0 min/wk (0–580), P=0.234; 67% vs 31% increased PA by >60 min/wk; no significant changes in weight, HOMA-IR or fasting glucose	23	62.2	High risk
398	2018	Not reported	Iran	PCOS	Upper-middle-income	Tehran University of Medical Sciences research grant (No. 26168)	32	Randomized controlled trial (quasi-randomized; laboratory-based)	University hospital infertility and endocrinology centers	Open-label	Quasi-randomization by attendance order (even/odd allocation)	Not described	Not stated	Complete-case analysis; no imputation reported	CC significantly reduced Wnt3, Wnt7a, and Wnt8b mRNA and protein expression vs letrozole and controls (p<0.05–0.001); endometrial thickness significantly lower with CC (6.94 vs 8.10 mm, p<0.05)	21	56.8	High risk
399	2021	IRCT20170513033941N60	Iran	Endometriosis	Upper-middle-income	Vice-Chancellor for Research, Iran University of Medical Sciences	60	Randomized double-blind placebo-controlled trial	Single-center (Rasoul Akram Hospital, Tehran)	Double-blind (participants + researchers)	Computer-generated random numbers; stratified by BMI (<25/≥25) and age (<30/≥30)	Concealed using coded drug kits; identical capsules	No – per-protocol (n=50)	10 participants withdrew; no imputation performed	↓ Pelvic pain (b = –1.12; p=0.03); ↓ total/HDL ratio (b = –0.29; p=0.04); ↓ hs-CRP (b = –0.64 mg/L; p<0.001); ↑ TAC (b = 47.54 mmol/L; p=0.001); no significant effect on most metabolic outcomes	32	86.5	High risk
400	2016	NCT01321840	Germany	Endometriosis	High-income	Horst Görtz Foundation; Theophrastus Foundation; Schweizer-Arau Foundation	67	Randomized, wait-list controlled clinical trial	Multicentre (university radiology + gynecology + private practice)	Unblinded; self-reported outcomes; MRI assessors independent	Telephone randomization using computer-generated list	Centralized; random list prepared by non-treating investigator	Partial — analyses used available data	Some attrition (10% at 3 mo; 39% at 6 mo; 16% at 24 mo); no imputation	At 3 months: Max global pain −3.0 vs −0.9 (mean diff −2.1, p=.002); Avg pain −2.5 vs −0.0 (p<.001); Pelvic pain −2.4 vs −1.0 (p=.036); Dyschezia −3.1 vs +0.4 (p=.003); QoL physical +5.5 vs +1.7 (p=.026); QoL mental +5.1 vs −0.8 (p=.031). Effects maintained at 6 & 24 months.	29	78.4	High risk
401	2019	NCT02802865	USA	PCOS	High-income	University of Iowa Dept. of OB/GYN; Davis Fund; Molinaro-Blonigan Research Fund; no role in study design	70	Open-label parallel RCT	Two academic reproductive medicine clinics	Open-label (no participant or investigator blinding); objective endpoint reduces bias	Computer-generated minimisation algorithm stratified by age (<35/≥35) and BMI (<30/≥30)	Allocation concealed via secure network system until randomisation	Yes—ITT explicitly reported and used	Missing outcomes classified as non-ovulatory; minimal loss to follow-up	Ovulation: 77% vs 43% (RR 1.80, 95% CI 1.18–2.75, p = .007); conception 12% vs 9% (NS); similar adverse events; no congenital anomalies	33	89.2	Some concerns
402	2020	RCT: ISRCTN84389045 Real-world study: ISRCTN13389832	Spain	GDM	High-income	Fundación para Estudios Endocrinometabolicos; Instituto de Salud Carlos III (Spain); FEDER (European Regional Development Fund)	260	Randomised controlled trial with a real-world implementation study	Single-centre, hospital-based (Hospital Clínico Universitario San Carlos, Madrid)	Open-label; no blinding of participants or care providers; outcome assessment based on objective clinical measures	Randomisation stratified by age, ethnicity, BMI, and parity before 14 gestational weeks	Not explicitly described	Yes (participants analysed in assigned groups; real-world cohort analysed separately)	Not stated	GDM incidence significantly lower in intervention group (14.8%) and real-world group (13.4%) compared with control (25.8%); adjusted relative risk for GDM: IG 0.72 (95% CI 0.50–0.97), RW 0.77 (95% CI 0.61–0.97)	31	83.8	Some concerns
403	2019	NCT01850030	Spain	PCOS	High-income	Centre for Industrial Technological Development (CDTI); Biosearch Life (employees involved); funding IDI-20150571	60	Randomized, multicenter, double-blind, parallel-group RCT	Five clinical sites (Spain)	Quadruple-blind (participant, care provider, investigator, outcome assessor)	Computer-generated randomization (SIGESMUVR program)	Allocation numbers delivered via IRT system	Yes – ITT analysis presented for pregnancy rate	Worst-case assumption for ITT; per-protocol used for main analyses; exclusions documented	Pregnancy rate SG vs CG: 65.5% vs 25.9% (p=.003); Clinical pregnancy: 19 vs 7; Live birth 55.2% vs 14.8% (p=.002); OHSS lower in SG (3.4% vs 18.5%, p=.07)	34	91.9	High risk
404	2022	ClinicalTrials.gov NCT04650516	France	Endometriosis	High-income	NR	45	Randomized, controlled, open-label, two-parallel-group interventional trial.	Single centre	None (open-label). Participants knew whether they received VR headset or tablet. No blinding of assessors.	NR	NR	NR	Follow-up stopped at rescue medication; missing T240 data for 5 participants not imputed. No missing-data plan described.	Clustered analysis (T15–T240): Endocare mean pain reduction 1.58 (p<.001) vs control 0.38 (p=.008). Significant group*time interaction (p=.010). Individual timepoints: Significant superiority of Endocare at T15, T30, T45 (p<.05). Trend at T60. No difference at T240. Pain relief: Endocare mean 28% vs control 15% (all post-treatment P<.05). Maximum pain reduction: 42% (95% CI 30.8–53.2) vs 22% (95%…	27	73	Some concerns
405	2022	NCT04650516	France	Endometriosis	High-income	None declared; industry involvement (Lucine) acknowledged	45	Randomized controlled two-arm trial	Single specialized endometriosis clinic (IFEMEndo, Bordeaux)	Open-label; participants and clinicians not blinded; outcome self-reported	Computer-generated randomization	Not explicitly described; allocation occurred onsite	No explicit ITT; complete case approach	1 dropout; missing 240-min data handled per protocol; no imputation	Endocare ↓ pain from 6.0→4.5; control from 5.7→5.0; Endocare superior at T15–T45 (all p<.001); pain relief 28% vs 15%; max reduction 42% vs 22%	27	73	High risk
406	2022	NCT02916667	Israel	GDM	High-income	No financial support reported	103	RCT (parallel, 2-arm)	Single hospital maternal–fetal medicine unit	Investigators blinded; participants not blinded	Computer-generated randomisation	Investigators blinded; sealed allocation not explicitly stated but randomisation controlled	No (per-protocol only; excluded LTFU)	Women lost to follow-up excluded; no imputation	RR 0.28 (95% CI 0.18–0.81) for suboptimal glycemic control; no effect on LGA	30	81.1	High risk
407	2016	Not reported	Iraq	PCOS	Upper-middle-income	No external funding	26	Randomized clinical trial	Single teaching hospital infertility clinic	Not blinded	Participants “divided into two groups” (method not described)	Not described	No	Complete-case per-protocol	Metformin: ↑HDL (p=0.006), ↓TG (p=0.006), ↓VLDL (p=0.006), ↓testosterone (p=0.038), improved BMI, improved OGTT; EE-CA: ↓LDL (p=0.04), ↑TG (p=0.01), improved menses, hirsutism & acne; 5 pregnancies in metformin group	19	51.4	Some concerns
408	2020	ACTRN12616000018415	Australia	GDM	High-income	University of Sydney internal funding	46	Randomized controlled trial (parallel, 2-arm)	Antenatal clinics at Royal Prince Alfred Hospital and Campbelltown Hospital	Participants and all personnel except dietitian blinded	Block randomization stratified by age and BMI	Yes – opaque sealed envelopes	Modified ITT stated	Yes	Mixed-model approach; extreme outlier excluded; completer and mITT analyses reported	30	81.1	High risk
409	2024	NCT03559621	Belgium	GDM	High-income	University Hospitals Leuven; Novo Nordisk; Sanofi; AstraZeneca; Boehringer-Ingelheim; Lilly	240	Parallel-group RCT	8 diabetes/endocrine clinics (regional + university hospitals)	Open-label; outcome assessors not blinded	Computer-generated permuted blocks (2,4); stratified by centre and prepregnancy BMI	Yes – password-protected system	Claimed ITT but functionally PP due to lack of interim data	Complete-case primary; 50-dataset multiple imputation sensitivity analysis	Primary: 46.3% vs 43.3% met weight goal (OR 1.13, CI 0.63–2.03, p=0.680). Metabolic syndrome: 7.3% vs 16.5% (OR 0.40, CI 0.22–0.72, p=0.002). Sedentary time −55.7 min/day (p=0.032). No difference in diabetes, glucose intolerance, anthropometry, QoL or mental health	32	86.5	Some concerns
410	2015	RBR-3rndh6	Brazil	Endometriosis	Upper-middle-income	FAPESP (process 2013/11790-2)	22	Randomized controlled trial	Single tertiary hospital (Women’s Hospital, University of Campinas)	Non-blind	Computer-generated randomization	Opaque sealed envelopes	No	Complete-case (all 22 completed)	Chronic pelvic pain VAS ↓ from 5.95→2.45 (p<.001); DDS ↓ from 2.29→1.20 (p=.001); QoL: pain domain ↓ (p=.01); emotional wellbeing improved (p<.0001); modular score improved (p<.0001); dyschezia improved in acupuncture-like TENS (p=.01)	25	67.6	High risk
411	2020	NCT02769052	Brazil	Endometriosis	Upper-middle-income	CAPES (Brazil) + device donation from Medcell	101	Multicentre parallel-group RCT	Two university hospital outpatient clinics	None (open-label; participants aware of TENS use)	Block randomisation by groups of 20 using sealed opaque envelopes	Yes – sealed opaque envelopes	Yes – ITT stated and applied	Complete-case plus ITT; some participants excluded from per-protocol due to incomplete diaries	CPP improvement: TENS 7.11→4.55 (p<0.001); control 7.33→7.06 (NS). Deep dyspareunia: TENS 2.02→1.36 (p<0.001); QoL significantly improved in most EHP-30 domains. FSFI total improved in TENS group only.	31	83.8	Some concerns
412	2018	NCT02783612	Israel	GDM	High-income	None declared	126	Randomized controlled trial	Single tertiary university-affiliated medical center	Partial: Physicians seeing patients in clinic were unblinded; labor & neonatal staff blinded	Blocked randomisation (computer-generated)	Yes—opaque sealed envelopes	No	Listwise exclusion—lost-to-follow-up participants not analyzed	Means, SDs, proportions, p-values (Tables 1–4); daily % compliance; insulin initiation rates	28	75.7	Some concerns
413	2005	Not reported	Iran	PCOS	Upper-middle-income	Dabirashrafi Fertility & Endoscopy Research Center	187	Prospective randomized study (RCT)	Single-centre	No blinding reported	Random assignment to three groups (method not detailed)	Not reported	No ITT	Not reported	Pregnancy: 29.9% (5-point), 31.6% (10-point), 52.4% (15-point); Live birth: 20.9%, 28.1%, 47.6%; Significant improvement in 15-point group (P=0.016 and P=0.004)	21	56.8	Some concerns
414	2012	IRCT201011083664N3	Iran	PCOS	Upper-middle-income	Tabriz University of Medical Sciences (Nutrition Research Center)	64	Double-blind randomized controlled clinical trial	Outpatient obstetrics department, Alzahra Hospital	Double-blind	Block randomisation matched by age & BMI	Capsules identical; blinding maintained for participants and investigators	Per-protocol only	3 dropouts removed; no imputation	Adiponectin ↑ 19.5% (p=0.003). Glucose ↓ 11.4%, Insulin ↓ 8.4%, HOMA-IR ↓ 21.8% (all p<0.001). TC ↓ 8.1%, LDL-C ↓ 14.9% (p=0.002–0.003). TG ↓ 5.0% (p=0.024 within-group). HDL-C ↑ 7.4% (p=0.018 within-group). hs-CRP: no change. (Table 3, pages 513–514)	26	70.3	High risk
415	2015	NCT01219101	Iran	PCOS	Upper-middle-income	Royan Infertility Research Center	154	Randomized, double-blind, placebo-controlled	Single fertility center (Royan Institute)	Double-blind (participants, clinicians, assessors)	Computer-generated random numbers	Sealed, serially numbered envelopes with identical placebo	Per-protocol only	Excluded 59 cancelled cycles; no imputation	Endometrium 9.7 vs 8.9 mm (p=0.04); PI right 2.4 vs 2.8 (p=0.03); PI left 2.3 vs 2.9 (p=0.001); Clinical pregnancy 29% vs 10% (p=0.02); Chemical pregnancy 31% vs 10% (p=0.01)	29	78.4	Some concerns
416	2021	ClinicalTrials.gov NCT01922791	Finland	GDM	High-income	Academy of Finland; State Research Funding for Health Science; Diabetes Research Foundation, Finland	269	Parallel, two-arm, single-blind, randomised controlled dietary trial	Single-centre (University of Turku, Finland)	Single-blind (laboratory/statistical personnel); participants unblinded	Computer-generated randomisation, 1:1 ratio	Yes – sealed opaque envelopes	Yes – ITT analysis for clinical outcomes	Missing microbiome samples excluded listwise (no imputation)	Diet group had higher fibre intake (+5.5 g/day, p<0.01), lower energy intake (p=0.02); microbiota diversity higher; GDM prevalence 11.1% (diet) vs 21.9% (control), p=0.045; enrichment in Bifidobacterium adolescentis and Faecalibacterium prausnitzii in responders	33	89.2	High risk
417	2022	EUDRACT 2015-000361-31 (EU-CTR)	Spain	GDM	High-income	Consejería de Salud y Familias de la Junta de Andalucía; Fundación SED; Instituto de Salud Carlos III (CIBER, JR20-00040, PI18/01160, PI21/01677)	58	Parallel, open-label, randomized clinical trial	Single-centre (University Hospital Virgen de la Victoria, Málaga)	Open-label (participants unblinded; lab staff blinded)	Computer-generated 1:1 randomization	Yes – sequence-controlled allocation	Yes – ITT analysis with LOCF	Last observation carried forward for missing data	↓ Postprandial glucose (122.9 vs 129.6 mg/dL, p=0.012); ↓ weight gain (2.3 vs 4.7 kg, p=0.023); ↓ BMI increase (0.86 vs 1.78, p=0.020); ↓ Firmicutes, ↑ Proteobacteria, ↑ Enterobacteriaceae (correlated with ↓ BMI, ↓ glycemia); ↑ C. catus; ↓ Peptostreptococcaceae	32	86.5	High risk
418	2006	ISRCTN55906981	Netherlands	PCOS	High-income	Merck Santé, France (study medication supply)	225	Randomized, double-blind, placebo-controlled clinical trial	Multicentre (20 Dutch hospitals)	Double-blind (participants and investigators)	Computer-generated block randomization, stratified per centre	Numbered, blinded containers supplied by coordinating centre	Yes, primary results reported using ITT principle	Per protocol and ITT analyses; dropouts accounted for	Ovulation rate: 64% (metformin) vs 72% (placebo), risk difference −8% (95% CI −20% to 4%) Ongoing pregnancy: 40% vs 46%, risk difference −6% (95% CI −20% to 7%) Spontaneous abortion: 12% vs 11%, risk difference 1% (95% CI −7% to 10%) Discontinuation due to side effects: 16% vs 5%, risk difference 11% (95% CI 5% to 16%)	35	94.6	Some concerns
419	2008	not stated	Netherland	PCOS	High-income	Merck Sante France provided metformin and placebo tablets	225	Randomized, double-blind, placebo-controlled multicenter trial	20 Dutch hospitals (coordinated by Academic Medical Center, Amsterdam)	Double-blind	Computer-generated blocks of four, stratified per center	Blinded numbered containers provided to hospitals	Not explicitly reported	Some variables incomplete (2h glucose 80%, HOMA-IR 50%), analyses performed on available data	Overall ongoing pregnancy: 40% (metformin) vs 46% (placebo), RR 0.87, 95% CI 0.64–1.2 Side effects: 16% metformin vs 5% placebo discontinued due to adverse effects (RR 2.9, 95% CI 1.2–7.1) Subgroup effect significant for age and WHR (P interaction 0.014) Older women (≥28 yrs) with high WHR (≥0.85): metformin increased pregnancy rate (39% vs 25%, RR 1.6, 95% CI 0.98–3.8) Younger women (<28 yrs) wi…	34	91.9	Some concerns
420	2010	NCT00965991	United States	GDM	High-income	Not reported; authors report no conflicts of interest	149	Randomized controlled trial	Single academic center (University of New Mexico)	Open-label (participants & clinicians unblinded)	Computer-generated list; sequentially numbered envelopes	Sequentially labelled, opaque, sealed envelopes	Yes — ITT used	All randomized included; minimal attrition; per-protocol not used	Treatment failure: 34.7% metformin vs 16.2% glyburide (P=.01). Birth weight lower in metformin (3103 g vs 3329 g, P=.02). Cesarean delivery higher in metformin (11 vs 2, P=.02). Glycemic levels among responders similar between groups.	30	81.1	Low risk
421	2020	IRCT20180509039590N1	Iran	PCOS	Upper-middle-income	Shahid Sadoughi University of Medical Sciences, Yazd (Grant 5870)	52	Randomized controlled trial	Diabetes Research Center, Yazd	No blinding	Table of random numbers (simple randomization)	Not described	Not explicitly described as ITT; appears per-protocol	Losses reported; no imputation; only completed questionnaires analyzed	Body image concern: significantly lower post-intervention & 1-month (P=0.03). Self-esteem: significant improvement post-intervention (P=0.05) but not maintained at 1-month (P=0.92).	28	75.7	Some concerns
422	2010	Not reported	Australia	PCOS	High-income	University of Adelaide/CSIRO Collaborative Grant	46	Randomized controlled trial (parallel; pilot)	Single-centre academic research setting	Open-label	Randomized (method described in prior protocol)	Not described	Not stated	Completer analysis; dropouts described; no imputation	Weight loss (~7.7 kg) improved large and small arterial compliance and reduced fasting/postprandial insulin, triglycerides, FFA (P<0.05); no difference between LP and HP diets	26	70.3	Some concerns
423	2013	ClinicalTrials.gov NCT00911404	Spain	GDM	High-income	Not reported (institutional support; public health-funded study)	152	Parallel, open-label, two-arm RCT	Single-centre (Hospital Universitari Arnau de Vilanova, Lleida)	Open-label (participants and clinicians unblinded; analysts blinded)	Randomisation via sealed opaque envelopes	Yes – concealed until allocation	Yes – ITT analysis with 95% CI	Complete-case analysis; minor dropouts excluded	Insulin therapy required in 54.7% of both groups (P=1.0); no difference in insulin dose, obstetric or neonatal outcomes; lower maternal weight gain in low-CHO group (1.1 vs 2.1 kg, P=0.017)	31	83.8	High risk
424	2012	None reported	Finland	PCOS	High-income	Finnish Medical Association; Academy of Finland	320	Multicentre double-blind placebo-controlled RCT	5 university hospitals	Double-blind: participants + clinicians + analysts blinded	Block randomisation (blocks of 10) stratified by BMI; computer-generated	Yes – pharmacy-controlled sealed opaque containers	Yes – ITT for PR and LBR	Missing values from withdrawals; complete-case for metabolic outcomes	PR: 53.6% vs 40.4% (p=0.006); LBR: 41.9% vs 28.8% (p=0.014); HR for pregnancy 1.6 (95% CI 1.13–2.27); miscarriage 15.2% vs 17.8% (NS)	35	94.6	High risk
425	2009	Not registered	Australia	GDM	High-income	Illawarra Diabetes Service; University of Sydney	63	Parallel RCT	Single-centre	Open-label; clinicians blinded to allocation	Permuted blocks of unequal size generated in STATA	Yes – sealed opaque envelopes	No (per-protocol)	Complete-case analysis, no imputation	Insulin required: 29% LGI vs 59% high-GI (p=0.023); switching high-GI → LGI avoided insulin in 9/19; no difference in birthweight or neonatal outcomes	29	78.4	Some concerns
426	2020	IRCT20180711040428N1	Iran	PCOS	Upper-middle-income	None (no financial support)	44	Randomized clinical trial (double-blind RCT)	Single-centre (university-affiliated setting, Tehran)	Double-blind (participants, investigators, lab blinded)	Block randomization	Codes kept by an independent third party	No ITT; only completers analyzed	Dropouts excluded (complete-case)	↓ Free testosterone (p=0.038 ANCOVA); ↓ TG; ↓ total cholesterol; no effect on DHT or androstenedione; no change in BMI, WC or weight; no change in fasting glucose/insulin	33	89.2	Low risk
427	2012	Not reported	Iran	GDM	Upper-middle-income	Shahid Sadoughi University of Medical Sciences	45	Parallel RCT	Single centre (Yazd Diabetes Research Centre)	Single-blind (laboratory/assay staff blinded to group allocation)	Random allocation into two groups; method not fully described	Not reported	No ITT	Complete-case analysis; 45 completed	Vitamin D ↑ from median 24 → 62 nmol/L (P<0.001); HOMA-IR stable in intervention (0.6→0.5, P=0.7) but worsened in control (0.5→0.9, P=0.01); QUICKI preserved in intervention, decreased in control (P=0.008); fasting glucose ↑ only in control (P=0.05)	27	73	Some concerns
428	2023	ClinicalTrials.gov NCT05521893	Slovenia	GDM	High-income	None declared (institutional resources; University Medical Centre Ljubljana)	106	Parallel, randomized controlled trial	Single-centre (University Medical Centre Ljubljana)	Single-blind (assessors blinded; participants unblinded)	Simple randomisation (1:1)	Yes – independent sequence and sealed envelope method	Yes – ITT and per-protocol conducted	Complete-case analysis (5.1% missing data; no imputation)	↓ Postprandial glucose (5.6 ± 0.3 vs 5.9 ± 0.4 mmol/L, p=0.004); ↓ glucose readings > target (10.4% vs 14.6%, p=0.015); ↓ cesarean (17.3% vs 35.3%, p=0.038); no diff. in GWG, insulin, neonatal outcomes	32	86.5	High risk
429	2013	None reported	USA	PCOS	High-income	Not stated	36	Randomized three-arm metabolic study (NO control arm)	Single academic medical center (SUNY Downstate)	Open-label	Participants “randomly divided” – method not described	Not reported	No	Not reported; dropouts described but no imputation	FFA decreased only with spironolactone (p<0.03); BMI ↓ with metformin (p<0.04); systolic BP ↓ with spironolactone (p=0.04); aldosterone ↑ significantly with spironolactone (p<0.001)	23	62.2	Some concerns
430	2024	NCT03864549	Israel	GDM	High-income	Altman Research Institute	85	RCT (double-blind, placebo-controlled)	5 university medical centers	Double-blind (participants + providers)	Computer-generated sequence, block size 4	Yes — sealed opaque envelopes	Yes	No imputation; complete-case analysis	No difference in mean daily glucose (99.7 vs 98.0 mg/dL, p=.35); no difference in need for pharmacotherapy (59% vs 41%, p=.10); no differences in pre/postprandial glucose or neonatal outcomes	34	91.9	Some concerns
431	2021	IRCT20120913010826N28	Iran	PCOS	Upper-middle-income	Not explicitly stated; institutional academic support implied (no conflicts reported)	64	Randomized placebo-controlled 2×2 factorial RCT	Two outpatient medical centers (Yazd, Iran)	Double-blind (participants + investigators)	Computer-generated random numbers	Envelopes opened after patient admission; unclear if fully concealed	Yes – ITT stated and used	All randomized participants included; not explicitly describing imputation; dropout described	No significant differences between groups for TT, SHBG, FAI, WC, HC, WHR; weight loss in all groups; interaction effect diet×fennel significant only for weight (P=0.019)	30	81.1	High risk
432	2025	IRCT20131125015536N15	Iran	Endometriosis	Upper-middle-income	Tehran University of Medical Sciences (Grant #73845)	50	Randomized controlled clinical trial	Hospital infertility clinic (Yas Hospital Complex, Tehran)	No blinding; open-label dietary intervention	Permuted block randomization (block size 4), stratified by endometriosis stage I/II	Not explicitly described	No explicit ITT; per-protocol for 44 completers	Dropouts excluded (6 lost/excluded for non-compliance); no imputation	Dyspareunia ↓: MD 0.82 (95% CI 0.12–1.52, p=0.02). Dyschezia ↓: MD 1.06 (95% CI 0.46–1.6, p=0.001). Pelvic pain: marginal (p=0.07). Anthro & lipids: no between-group differences; TC change ↑ in intervention (p=0.04). AST ↓ within both groups (p=0.02–0.03).	28	75.7	Some concerns
433	2013	ACTRN12613000125729	Australia	GDM	High-income	Quality and Patient Safety Strategic Research Centre, Deakin University	370	Randomised controlled trial (individual-level)	Primary care (30 general practices, rural/regional Victoria)	Open-label; data analyst blinded	Computer-generated block randomisation	Yes – opaque sealed envelopes, independent allocator	Yes – intention-to-treat planned	Missing data excluded (no imputation)	Hypothesised 10% GDM reduction; outcomes to be reported after trial completion	31	83.8	Some concerns
434	2024	IRCT20200114046123N1	Iran	PCOS	Upper-middle-income	No external funding reported	128	Cluster randomized controlled trial (CRT)	School-based, 8 high schools across Tehran	Assessor-blinded statistician only; participants, teachers, and trainers not blinded (open-label)	Stratified cluster randomization by geographic region; schools randomized to intervention vs control	No concealment described; allocation by school code using random table	Yes — ITT used; no sample excluded (missingness assumed random)	Missing data assumed random; no imputation reported; participants lost to follow-up included in ITT where possible	PCOS Intervention vs PCOS Control: Weight −3.14 kg (95%CI −3.73, −2.55), WC −4.68 cm (−5.75, −3.61) every 6 months; FG score −5 pts (−5.93, −4.00); OR for menstrual regularity 3.30 (2.06, 5.25); OR for acne improvement 0.46 (0.31, 0.70). Physical activity ↑ by 38.13 MET-min/week at 12 months.	29	78.4	High risk
435	2025	IRCT20120704010181N11	Iran	PCOS	Upper-middle-income	Ahvaz Jundishapur University of Medical Sciences	70	Open-label RCT	Single-centre endocrinology clinic	Open-label; lab technicians blinded	Computer-generated, stratified by age (<30/≥30) and BMI (<25/≥25)	Implemented via REDCap; independent statistician	Yes – both ITT and PP analyses	Excluded <90% adherence from PP; all randomized included in ITT; no imputation	FSH ↑ (effect 0.87, 95% CI 0.086–1.75, p=0.027); LH/FSH ↓ (effect −0.341, 95% CI −0.63 to −0.08, p=0.031); no changes in AMH, LH, estradiol, DHEAS, androstenedione	27	73	Some concerns
436	2011	not reported	Greece	PCOS	High-income	not reported	43	Prospective, randomized, single-centre trial	Academic hospital outpatient setting	Not blinded (open-label)	not specified	not specified	not reported	not reported	Pioglitazone increased weight, BMI, waist circumference, total and LDL cholesterol Metformin decreased LDL-cholesterol Both improved flow-mediated dilation significantly, restoring it to control levels Pioglitazone had greater effects on ISI and glucose-to-insulin ratio HDL increased more with pioglitazone (trend p = 0.08) FMD improvement predictors: insulin sensitizer use (39% variance), reducti…	24	64.9	High risk
437	2024 (corrected 2025)	IRCT20130812014333N143	Iran	PCOS	Upper-middle-income	None (explicitly stated)	30	Randomized controlled trial (parallel)	Single center (Imam Reza Hospital, Kermanshah)	None (open-label)	Computer-generated sequence	Sequentially numbered, sealed opaque envelopes	No (per-protocol; all 30 completed)	All participants completed; no imputation	Significant ↓ insulin (p<0.001), ↓ HOMA-IR (p<0.001), ↓ total-chol (p<0.001), ↓ LDL-C (p<0.001), ↓ testosterone (p<0.001), ↓ FAI (p<0.001), ↓ AMH (p=0.02 between-groups), ↓ MDA (p=0.04), ↑ QUICKI (p=0.002). No significant change in TG, HDL-C, SHBG, TAC, hs-CRP. (Table 3 & Fig. 2)	32	86.5	Some concerns
438	2018	IRCT201509115623N53	Iran	PCOS	Upper-middle-income	Research Deputy of Arak University of Medical Sciences	60	Randomized double-blind placebo-controlled clinical trial	Single outpatient gynecology clinic (Kossar Clinic, Arak)	Double-blind (participants and investigators)	Computer-generated random numbers	Allocation concealed from researchers and participants until analysis	No – per-protocol only (all participants completed)	No imputation; complete-case	Significant vs placebo: ↑SHBG +19.8 nmol/L (p=0.01); ↓mFG −1.3 points (p=0.01); ↓FAI (p=0.01); ↓hs-CRP −950 ng/mL (p=0.02); ↑NO +5.5 μmol/L (p=0.006); ↓insulin (p=0.003); ↓HOMA-IR (p=0.003). Trend: ↓testosterone (p=0.09); ↓MDA (p=0.05).	33	89.2	High risk
439	2017	NR	Iran	PCOS	Upper-middle-income	NR (acknowledgements thank university but no funding source listed)	108	Prospective randomized controlled trial	Two centres (university infertility clinic + private practice)	None (no blinding described)	“Randomized method ensuring same baseline variables”; method not specified	NR	No	NR	Mean ± SD values reported for all continuous variables	27	73	Some concerns
440	2017	NIMH Protocols NCT00001259 & NCT00001322	USA	PMDD	High-income	NIH Intramural Research Program	30	Double-blind randomized crossover clinical trial	Single centre (NIMH, USA)	Double-blind (participants, clinicians)	Randomized to order of E2 vs P4 addback; crossover design	Medication kits (patch + suppository) identical; allocation concealed by pharmacy	No — per-protocol (complete cases only)	Values below detection excluded; no imputation	Significant increases in estrone-SO4 and estradiol-3-SO4 after E2; significant increases in allopregnanolone, pregnanediol, cortexone after P4; PMDD showed attenuated estradiol-3-SO4 response to E2 and decreased DHEAS after P4	30	81.1	Some concerns
441	2014	NCT01158131	USA	GDM	High-income	CDC Cooperative Agreement MM-1094–09/09; NIH T32AT000051; NIH K24HL096141	75	Randomized controlled trial (parallel-group)	Brigham & Women’s Hospital (single center)	Single-blind (measurements performed by blinded staff; participants & lifestyle coaches unblinded)	Permuted blocks with variable block size	Yes – sealed, sequential, opaque envelopes prepared by independent statistician	Yes – analyzed by allocated group (ITT stated)	Mixed-effects models treated missing at random; LVCF for certain sensitivity analyses; medical-record weights substituted when needed	Weight change 6w→12m: –2.8 kg (–4.8 to –0.7) vs +0.5 kg (–1.4 to +2.4) (P=.022). Change from prepregnancy: –0.7 kg vs +4.0 kg (P=.035). BMI ↓1.1 vs +0.2 (P=.004). Lower dietary intake (~−178 kcal/day at 6m). No group differences in physical activity or glucose tolerance.	33	89.2	Some concerns
442	2016	ClinicalTrials.gov NCT01158131	United States	GDM	High-income	Centers for Disease Control (CDC MM-1094-09/09); NIH (T32AT000051, HL007609, HD057022, HL096141)	75	Parallel randomized controlled trial	Single tertiary care hospital (Brigham and Women’s Hospital, Boston)	Single-blind (statisticians blinded)	Computer-generated randomization 1:1	Yes – independent data center	No (recruitment/feasibility phase)	Complete-case analysis	69% eligibility yield; 107/156 recruited; 75/78 randomized; demographics matched BWH GDM population (p>0.05)	31	83.8	Some concerns
443	2012	Not reported	India	PCOS	Lower-middle-income	Central Council for Research in Yoga & Naturopathy (Government of India, Ministry of Health)	90	Two-arm randomized controlled trial	Residential girls’ college campus	Double blinding not possible; outcome assessors (ultrasonologist, lab staff, statistician) blinded	Computer-generated random numbers; sealed envelopes	Yes – sealed opaque envelopes	No ITT; only per-protocol (n=72)	18 dropouts; complete-case analysis	Trait anxiety significantly reduced: Δ −14.97 vs −7.42 (P=0.002); State anxiety non-significant: Δ −12.27 vs −8.55 (P=0.243)	26	70.3	Some concerns
444	2023	IRCT20140907019082N9	Iran	PCOS	Upper-middle-income	Vice-Chancellor for Research, Tabriz University of Medical Sciences (grant 69252)	48	Randomized, double-blind, placebo-controlled clinical trial	Two outpatient centers (Al-Zahra infertility clinic and Sheykholrais Polyclinic, Tabriz)	Double-blind (participants and researchers); placebo matched in color/flavor	Block randomization (1:1), varying block sizes, stratified by age and BMI; Random Allocation Software	Sequentially numbered, opaque, sealed envelopes; thylakoid and placebo sachets coded and packed by third party	No – per-protocol analysis of 44 completers	4 dropouts excluded; >90% sachet adherence; no imputation reported	Thylakoid group: ↓ LPS (23.57→22.19 EU/mL, adj p<0.001); ↑ BDNF (14.05→15.34 ng/mL, adj p<0.001); improved FBG, insulin, HOMA-IR, FTI, FSH/LH. Both groups on calorie restriction showed ↓ weight, BMI, WC, FM and improved glycemic/hormonal markers. No significant between-group changes in CAT, TAC, MDA, S100B after adjustment.	32	86.5	Some concerns
445	2012	Not reported	Iran	GDM	Upper-middle-income	Not reported	160	Randomized controlled trial	Three university hospitals (Women’s Hospital, Shariati, Valiasr)	Single-blind (clinicians blinded; participants not blinded)	Computer-generated list	Sequentially labelled opaque sealed envelopes	Not explicitly ITT	Complete-case; no imputation	Mean FBS & PP similar; maternal weight gain ↓ with metformin (11.3 vs 13.7 kg, p<0.001); LGA 17.5% vs 35% (RR 0.5, p=0.012); birth weight lower (3.3 vs 3.4 kg, p=0.005); neonatal anthropometrics lower in metformin	29	78.4	High risk
446	2015	ClinicalTrials.gov NCT00728377	United States	GDM	High-income	NIH/NIDDK Grant R01 DK074876	290	Parallel, two-arm randomized controlled trial	Single-centre (Baystate Medical Center, Massachusetts)	Participants unblinded; statisticians blinded	Block randomisation stratified by age (<30/≥30), BMI (<25/≥25), ethnicity (Hispanic/non-Hispanic)	Yes – sealed opaque envelopes	Yes – ITT analysis	Complete-case analysis; sensitivity by adherence and dose	GDM: 9.7% vs 15.0% (OR 0.61, 95% CI 0.28–1.32); IGT: 13.7% vs 18.9% (OR 0.68, 95% CI 0.35–1.34); no birth outcome differences; non-significant ↓ glucose	34	91.9	Some concerns
447	2020	NCT02387931	USA	Endometriosis	High-income	not specified	69	Randomized, double-blind, placebo-controlled trial	Single-center (Boston Center for Endometriosis)	Double-blind (participants and investigators)	not reported	not reported	not reported	not reported	Linear mixed models; t-tests for baseline comparisons; subgroup analyses (sensitivity for contraceptive use)	31	83.8	Some concerns
448	2011	None reported	Sweden	PCOS	High-income	Swedish Research Council; Karolinska Institutet; Stockholm County Council; A.M. Thomer Fund	57	3-arm randomized controlled trial	University hospital women’s health research unit	Not blinded (open-label lifestyle trial)	Permuted-block randomisation (10 blocks, block size 6)	Not described	No — analysis performed on completers	14 dropped out; no imputation performed	Weight loss: Diet −6%, Exercise −3%, Combined −5% (Table 2). Menstrual regularity: 69% improved overall (NS between groups). Ovulation: 34% overall (NS between groups). Body fat: Diet ↓ total and lower body fat significantly; Exercise ↓ upper body fat. Androgens: fT ↓ in diet group (p<0.01); T/SHBG ↓ in diet & combined. IGFBP-1 ↑ predicted ovulation (R²=0.25, p<0.05).	35	94.6	Some concerns
449	2015	Not specified (protocol: Trials 2013;14:121)	Ireland	GDM	High-income	Health Research Board of Ireland (ICE/2011/3)	50	Mixed methods RCT (parallel, 2-arm)	Single-centre (Galway University Hospital & Croí Heart Centre)	Single-blind (statisticians blinded)	Independent researcher-generated 1:1 sequence	Yes – independent assignment	Yes – ITT used for quantitative analysis	Complete-case analysis; multivariate ridge regression for covariate multicollinearity	Significant improvements in stress (p=0.04), diet self-efficacy (p=0.04), QoL (p=0.02); no significant differences in FPG (p=0.36) or BMI (p=0.67); GT2h improved (p=0.02) but lost significance after adjustment; EOP improvements in weight (−2.6 kg, p=0.006), LDL (−0.47 mmol/L, p=0.03)	28	75.7	Some concerns
450	2016	Not registered	Ireland	GDM	High-income	Health Research Board of Ireland	781	Parallel-group RCT	Multicentre (3 hospitals + GP practices)	Not blinded	Random permuted blocks via NQuery; independent researcher	Sequential sealed opaque envelopes	No (per-protocol analysis)	No imputation; complete-case	GDM prevalence: 6.5% vs 7.2%; time to diabetes care: 23.6 vs 18.9 days (p=0.09); LGA 20% vs 14.7% (p=0.09); no differences in maternal outcomes; neonatal outcomes similar	30	81.1	High risk
451	2005	not reported	Turkey	PCOS	Upper-middle-income	not reported	110	Prospective, randomized, double-blind, placebo-controlled trial	Single fertility center (Centrum IVF Clinic, Ankara)	Double-blind (patients + investigators)	Computer-generated randomization blocks; allocation concealed in coded envelopes	yes-sealed envelope	no	not reported	No significant differences across all major outcomes: Stimulation: - Duration: same - Total FSH dose: same - Follicles 10–16 mm: same - Follicles ≥17 mm: same Hormones: - Peak E2: similar (≈ 3600–3900 pg/mL) Oocytes: - Retrieved oocytes: 17 vs 17 (NS) - MII oocytes: similar Fertilization rate: - Metformin: 73.6% ± 15.5 - Placebo: 71.7% ± 17 (P = .56) Pregnancy: - Clinical pregnancy rate: Met 30.2…	29	78.4	High risk
452	2009	NTR1139	Netherlands	GDM	High-income	ZonMw (Netherlands Organisation for Health Research and Development)	160	Randomised controlled trial (prevention)	13 centres (3 hospitals, 10 midwifery practices)	Outcome assessors blinded; participants unblinded	Computer-generated, block randomisation in blocks of 4, stratified by hospital	Allocation schedule held by programmer; investigators not blinded after assignment	Yes	Full ITT planned; confounders included; follow-up design accounts for repeated measures	Protocol only — no results yet	33	89.2	Some concerns
453	2012	NTR1139	Netherlands	GDM	High-income	Netherlands Organisation for Health Research and Development (ZonMw); Netherlands Organisation for Scientific Research (NWO)	121	Randomised controlled trial with an economic evaluation (cost-effectiveness and cost-utility analyses)	Multicentre (hospitals and midwifery practices)	Open-label for participants and providers; outcome assessment blinded where applicable	Stratified block randomisation (block size 4), stratified by hospital	Not explicitly described	Yes	Multiple imputation by chained equations (MICE)	No statistically significant differences in costs or clinical outcomes; ICER for fasting glucose −€46,971; intervention not cost-effective	27	73	Some concerns
454	2016	ACTRN12610000338066	Australia	GDM	High-income	National Health and Medical Research Council (NHMRC) Partnership Projects; Victorian Department of Health; SA Health; Diabetes Victoria	573	Multicenter randomized controlled trial (open-label)	Community and academic health centres in Melbourne & Adelaide	Open-label	Permuted block randomization stratified by site and recruitment method	Centralized allocation via trial database	Yes – ITT and PPS reported	Yes	Mixed models for missing data; sensitivity analyses with missing as non-achievement	32	86.5	Low risk
455	2014	Not reported	Egypt	PCOS	Lower-middle-income	Personally funded by researchers	50	Randomized controlled trial	Integrated Fertility Center + Agial Fertility Center	Open-label	Computer-generated randomized program	Not described	No	Complete-case	Endometrium: 7.44 vs 8.08 mm (NS); mature follicles: 64% vs 88% (p=0.047); progesterone: 18.3 vs 28.0 ng/dL (p=0.012); pregnancy: 44% vs 64% (NS)	34	91.9	Some concerns
456	2016	NCT00593294	Italy	PCOS	High-income	University “Parthenope” Naples; University Hospital “S. Giovanni di Dio e Ruggi d’Aragona” Salerno	150	Randomized, double-blind, placebo-controlled, parallel-group RCT	University endocrine & cardiology units (hospital-based)	Double-blind for OCs vs placebo; exercise intervention unblinded but outcome assessors blinded	Computer-generated 1:1:1 randomization via random.org	Opaque sealed allocation, pharmacists dispensed tablets; investigators blinded to drug; assessors blinded to group	Yes – ITT used, excluding only those who never attended first follow-up	Per-protocol for those with follow-up; no imputation	SETP: ↓ IMT (0.55→0.39 mm), ↑ FMD, ↓ BMI (–1.4 kg/m²), ↓ WHR, ↓ HOMA-IR (4.2→3.2), ↑ VO₂max. OCs: ↓ Ferriman–Gallwey, ↓ testosterone & FAI, improved cycles, neutral metabolic effect.	28	75.7	Some concerns
457	2019	IRCT20170513033941N37	Iran	PCOS	Upper-middle-income	National Institute for Medical Research Development (NIMAD), Iran (Grant No. 965372)	60	Randomized, double-blind, placebo-controlled trial	Single outpatient gynecology clinic (Kashan)	Double-blind (participants and investigators)	Computer-generated random numbers	Allocation by trained staff using concealed codes	Not explicitly stated (all randomized completed study)	No missing data; complete-case analysis	Mental health: BDI β −0.58 (95% CI −1.15, −0.02; p=0.04); GHQ β −0.93 (−1.78, −0.08; p=0.03); DASS β −0.90 (−1.67, −0.13; p=0.02). Hormonal: Total testosterone β −0.19 ng/mL (−0.28, −0.10; p<0.001); SHBG NS (p=0.18); Hirsutism (mFG): β −0.95 (−1.39, −0.51; p<0.001). Inflammation/oxidative stress: hs-CRP β −0.67 mg/L (−0.97, −0.38; p<0.001); MDA β −0.25 μmol/L (−0.40, −0.10; p=0.001); TAC β +82.81…	33	89.2	High risk
458	2021	NCT01452685 (ClinicalTrials.gov, registered 17/10/2011)	Japan	Endometriosis	High-income	Takeda Pharmaceutical Company Limited (study sponsor; involved in design, data analysis, manuscript writing)	487	Phase 2 randomized, open-label, parallel-group extension study following a preceding double-blind RCT	Multicentre (101 clinics in Japan)	Open-label extension study.	Patients continued allocation from preceding double-blind RCT. (Original study used central randomization).	In extension phase: open-label for treatment continuation, but lab pharmacodynamic results were blinded until study completion. Allocation concealment mainly applied in preceding RCT.	Not formally ITT; full analysis set = all who received at least one dose	not mentioned	Pain reduction (pelvic pain VAS): • Placebo: −3.2 ± 12.16 • Relugolix 10 mg: −6.8 ± 10.56 • Relugolix 20 mg: −9.0 ± 11.84 • Relugolix 40 mg: −11.9 ± 11.26 • Leuprorelin: −12.7 ± 12.57 BMD Change at Week 24: • Placebo: −0.2% • Relugolix 10 mg: −1.6% • Relugolix 20 mg: −2.6% • Relugolix 40 mg: −4.9% • Leuprorelin: −4.4%	30	81.1	Some concerns
459	2021	NCT01458301	Japan	Endometriosis	High-income	Takeda Pharmaceutical Company Ltd.	487	Phase 2 RCT	108 hospitals/clinics nationwide	Double-blind for participants & investigators; double-dummy tablets + injections	Computer-generated Latin-square randomisation (5×5 and 4×4)	Stored in secured system; access restricted to authorized personnel; double-dummy	Yes—Full Analysis Set included all randomized who received ≥1 dose	Excluded patients without dosing; otherwise complete-case	Pelvic pain change: Placebo −3.8 mm; Relugolix 10 mg −6.2; 20 mg −8.1; 40 mg −10.4; Leuprorelin −10.6. Relugolix showed clear dose–response. E2, LH, FSH suppression rapid and dose-dependent. BMD decreased 1–2% with higher doses.	35	94.6	Some concerns
460	2017	Not reported	Turkey	PCOS	Upper-middle-income	None declared	196	Prospective randomized controlled trial	Academic reproductive endocrinology center (Dokuz Eylul University) + affiliated state hospital	No blinding; open-label	Randomization according to final digit of patient protocol number (odd vs even)	Not described	No — per-protocol for COH+IUI due to spontaneous pregnancies and cycle cancellations	Exclusions applied after MYO phase and cycle cancellation; no imputation	Pregnancy rate (COH+IUI): 18.6% vs 12.2% (p=0.02). Spontaneous pregnancy before IUI: 9.2% in MYO group. Total rFSH dose: 689 vs 777 IU (p=0.02). Stimulation duration: 8.6 vs 12.1 days (p=0.03). Insulin resistance: MYO ↓ fasting insulin (p=0.03), ↓ glucose (p=0.04), ↓ HOMA-IR (p<0.04).	27	73	Some concerns
461	2025	NCT05830487	Türkiye	PCOS	Upper-middle-income	TÜBİTAK 222S038 (public research funding)	44	Randomized controlled trial (parallel)	University hospital	Open-label	Stratified randomisation by age and BMI	Not reported	No (per-protocol only)	Dropouts excluded; no imputation	L-AGEs group had larger decreases in fasting glucose, CML, TT, FAI, AMH, LDL-C, TNF-α; sRAGE increased; weight loss similar between groups	31	83.8	Low risk
462	2016 (online 2015)	NCT01540747	Italy	PCOS	High-income	None stated; melatonin + MI supplement manufactured by Lo.Li.Pharma; one author employed by Farmares SRL	569	Randomized, controlled, double-blind clinical trial	Single IVF center (Praxi Pro Vita, Rome)	Double-blind (participants + investigators)	Computer-generated random assignment	Not explicitly described; supplements identical in appearance; managed externally	No ITT; per-protocol	Dropouts (n=43) excluded; no imputation	Melatonin levels: highest in MI+M group (213 ± 35 pg/mL) vs MI-only (69 ± 23) vs control (54 ± 3.5) (p<0.001). Gonadotropin IU: lowest in MI+M (2058 ± 233) vs MI (3113 ± 345) vs control (3657 ± 633) (p<0.001). Mature MII oocytes: MI+M 48.2% vs MI 35% vs control 38.2% (p<0.001). Grade I embryos: MI+M 45.7% vs MI 30.4% vs control 25.6% (p<0.001). Clinical pregnancy: not statistically different (41.…	33	89.2	High risk
463	2025	IMIB-GU-2019-02	Spain	GDM	High-income	Fetal Medicine Foundation; JP Moulton Foundation; Tommy’s; NIHR	113	Double-blind randomized placebo-controlled trial	Single tertiary hospital (Virgen de la Arrixaca, Murcia)	Double-blind (participants, clinicians, assessors)	Pharmacy-controlled randomisation; details in protocol	Yes — full concealment via external drug packaging	Yes — ITT used for primary and all secondary outcomes	Multiple imputation for primary outcome; complete-case for others	Primary: no difference (treatment effect 0.98; 95% CI 0.92–1.05; p=.61). Insulin: 10.7% vs 12.3%. LGA 9.3% vs 10.7%. NICU 9.3% vs 3.5%. Adherence subgroup: UDCA ≥0.5 mmol/L → RR 0.25 for fasting glucose ≥90 mg/dL (p=.039).	35	94.6	High risk
464	2005	Not reported	Italy	PCOS	High-income	Not stated (no funding declarations in article)	70	Double-blind RCT	University hospital reproductive endocrinology units	Double-blind: patients and operators blinded; identical metformin vs placebo tablets	Computer-generated random list in single blocks	Yes – allocation sequence concealed until assignment	No ITT; complete-case only	No missing data (0 dropouts); all 70 analysed	Mono-ovulation: 85.9% vs 64.4% (P=0.002); more vials required (P<0.001); longer stimulation (P<0.001); lower E2 per follicle (P=0.001); pregnancy 21.2% vs 16.1% (NS); live birth 94.4% vs 85.7% (NS); multiple pregnancies 2 vs 5 (NS); OHSS 0 vs 1	32	86.5	High risk
465	2010	NCT00558077	Italy	PCOS	High-income	None (authors report no external funding)	50	Randomized controlled trial	Two academic centres (Catanzaro & Naples)	Not blinded (surgery vs medication)	Online randomization (randomization.it), single block	Sealed dark opaque envelopes	Yes (analysis by assigned group)	3 excluded for missing first follow-up; otherwise complete-case	Per-cycle ovulation: 56.5% vs 72% (p=.023); pregnancy/cycle: 16.3% vs 13.1%; live birth/cycle: 14.1% vs 11.2%; cumulative pregnancy: 62.5% vs 60.9%; RR pregnancy 1.2 (95%CI 0.61–2.44)	34	91.9	Some concerns
466	2010	NCT0100468	Italy	PCOS	High-income	Not specifically stated; no commercial funding reported	96	Parallel, randomized controlled trial	University reproductive medicine unit	Single-blind (assessor blind only)	Computer-generated single-block sequence	Sequentially numbered opaque sealed envelopes	Yes – ITT and PP identical because no dropouts	No imputation needed	Ovulation: 37.5% (Group C) vs 12.5% (A) vs 9.4% (B). RR 3.9 (95% CI 1.1–8.3) vs A; RR 4.0 (1.2–12.8) vs B. Menstruation: 34.4% (C) vs 12.5% (A) vs 9.4% (B). Significant improvements in testosterone, androgens, SHBG, GIR, HOMA-IR in A and C vs B at 2 weeks.	34	91.9	Low risk
467	2011	NCT01233206	Italy	PCOS	High-income	NR	120	Parallel, randomized, double-blind, placebo-controlled clinical trial	Multicentre (academic hospitals and IVF centres	Double-blind (participants, clinicians, and investigators).	Computer-generated permuted block randomization, stratified by centre and prior stimulation characteristics; prepared by independent statistician.	Yes. Central pharmacy dispensed identical metformin/placebo tablets using trial numbers; allocation concealed until assignment.	Yes. Analyses reported as both intention-to-treat and per-protocol; no dropouts.	Not applicable (no losses to follow-up).	Primary outcome: OHSS incidence 8.3% metformin vs 30.0% placebo (RR 0.28; 95% CI 0.11–0.67; p = 0.003; NNT = 5). Moderate/severe OHSS: significantly reduced (RR 0.20). Cancellation due to OHSS risk: 5.0% vs 18.3% (p = 0.023). Peak E2 levels: significantly lower with metformin. Pregnancy & live-birth rates: no significant differences between groups.	36	97.3	Some concerns
468	2011	NCT01208740	Italy	PCOS	High-income	Not reported	88	Randomized, double-blind, placebo-controlled clinical trial	Two academic hospitals + one private IVF clinic	Double-blind (participants, clinicians, investigators)	Computer-generated permuted blocks of 4	Sealed, opaque, dark envelopes	Yes (no dropouts; ITT = PP)	No missing data	Metformin worsened response: Poor responders 43.2% vs 20.5% (p=.022); oocytes 3 vs 5 (p=.009); MII 2.3 vs 4 (p=.017); peak E2 480 vs 734 pg/mL (p=.001); higher gonadotropin dose (p<.001); pregnancy outcomes ns	30	81.1	Some concerns
469	2025	ChiCTR2100048527	China	GDM	Upper-middle-income	Suzhou Science & Technology Project (SKY2022025); Kunshan R&D Project (KS2214)	200	Multicenter, parallel-group RCT	Four hospitals	Open-label (no blinding)	Central computerized 1:1 randomization system	Not described	No ITT; per-protocol only	Dropouts excluded (29 withdrawals); no imputation	Means, SDs, medians, IQRs, RRs, 95% CI, violin plots, tables for glucose and GQR	33	89.2	Some concerns
470	2023	NCT04801173	Italy (Bologna)	PCOS	High-income	Pronokal Group®	30	Open-label parallel RCT	Single centre endocrine/gyn unit	Open-label; outcome assessors for hormones & ovarian morphology were not blinded	Randomized prior to recruitment order ensuring age/BMI matching; two equal groups	Not concealed (open-label diet allocation)	No (per-protocol only; dropouts excluded)	No imputation; complete-case; 3 dropouts documented	BMI −13.7% vs −5.1% (p=0.0003); waist −11.4% vs −2.9%; fat mass −24% vs −8.1%; SHBG ↑ (p=0.0004); free testosterone ↓ (p=0.0009); HOMA-IR improved only in VLCKD; ovulation 84.6% vs 35.7% (p=0.018)	34	91.9	Low risk
471	2018	None reported	Nigeria	PCOS	Lower-middle-income	Usmanu Danfodiyo University Sokoto research grant	200	Single-blind (participants blinded) randomized controlled trial	Single tertiary university teaching hospital	Single-blind (participants only)	Envelope draw (odd/even allocation); coin toss to determine which corresponds to intervention	Yes—closed envelopes; assignment written inside and concealed	No	Complete-case; 5 dropouts excluded	Pregnancy: 22% vs 2%; live birth: 18% vs 2%; MDA ↓ significantly; antioxidants ↑ significantly (GPx p<0.001, SOD p<0.0001, CAT p=0.0369); vitamins A/C/E and Zn/Cu all ↑ significantly	28	75.7	Some concerns
472	2018	NCT02204657	Malaysia	GDM	Upper-middle-income	UM Research Grant, University Malaya	50	Prospective open-label RCT	Single tertiary centre (University Malaya Medical Centre)	Open-label; no participant/provider blinding	Block randomisation in blocks of 4 via sealed envelopes	Sealed opaque envelopes; allocation by research assistant	No explicit ITT statement	All 50 completed; no missing data issues reported	ΔHbA1c +1 mmol/mol CGM vs +3 mmol/mol control (P=0.024); HbA1c at 37 wks: 33±4 vs 38±7 mmol/mol (P=0.006); more women achieving HbA1c <39 mmol/mol (92% vs 68%, P=0.012); no severe hypoglycaemia	31	83.8	High risk
473	2024	NCT04614246	20 countries (Europe, North America, China, Japan)	Endometriosis	Mixed Income	Bayer AG	215	Randomized, double-blind (to placebo), active-comparator–controlled, phase 2b, dose-finding parallel-group RCT	Multicenter (144 sites across 20 countries)	Double-blind for eliapixant vs placebo; open-label elagolix comparator	Central IWRS, 1:1:1:1:1 assignment	Identical placebo tablets; central concealment through IWRS	Full-analysis set used; but study early termination → not classic ITT; per-protocol primary	High missingness due to early termination; no imputation described; missing = not evaluable	Mean EAPP change at Week 12: −1.56 (25 mg), −2.12 (75 mg), −1.88 (150 mg), −1.89 (placebo); elagolix −2.83. No dose-response; p>0.4 for all MCP-Mod models	34	91.9	High risk
474	2006	not reported	USA	Endometriosis	High-income	Intramural Research Program of the NICHD, NIH	53	Prospective clinical trial	Government research hospital (NIH Clinical Center)	Open-label for surgery; double-blind for raloxifene/placebo	Randomization to raloxifene or placebo in biopsy-proven endometriosis subgroup	not reported	not reported	not reported	Dysmenorrhea decreased significantly in women with JZ ≤8 mm (VAS decreased 4.3 ± 0.6, P < .0001), less decrease in JZ 8–11 mm (VAS decreased 4.8 ± 1.3, P = .02), and no significant decrease in JZ ≥11 mm; nonmenstrual pain decreased significantly only in JZ ≤8 mm (VAS decreased 4.0 ± 0.7, P < .0001); correlations: dysmenorrhea r=0.47, P=.01; nonmenstrual pain r=0.51, P=.004	30	81.1	Some concerns
475	2023	NCT01799733	USA	PMDD	High-income	NIH R01 AT007169	44	Randomized, counterbalanced crossover RCT	Single academic research center (UCSD)	Blinded raters for mood; participants unblinded to intervention timing	Randomized order for intervention sequence	Not reported	No	Only completers analyzed; protocol deviations excluded; no imputation	PAI advanced 6-SMT offset by +0.84±1.36 h vs +0.28±2.35 h with PDI (p<0.001); mood improvement greater with PAI for HRSD, Atypical, SIGH-ADS (all p<0.05); mood improvement correlated with 6-SMT advance (HRSD r=0.815, p=0.001)	32	86.5	Some concerns
476	2011	not reported	Denmark	PCOS	High-income	not reported	84	Randomized, double-blinded, placebo-controlled crossover trial	Single-center	Double-blind	Randomized	not reported	Metformin reduces AMH levels in women with PCOS; effects vary by metabolic status	Effects stratified by obesity/metabolic profile	CONSORT guidelines partially applie	29	78.4	High risk
477	2021 (online 2020)	IRCT2015081823678N1	Iran	Endometriosis	Upper-middle-income	Research Deputy of Tehran University of Medical Sciences (grant 930330-26813)	34	Randomized exploratory clinical trial	Single tertiary-care academic infertility center	Not blinded; open-label supplementation	Random allocation into two groups (method not fully detailed)	Not reported	Not stated as ITT; appears per-protocol	No imputation; excluded one pregnancy	Significant reduction in active β-catenin in treatment group (p = 0.000); significant difference vs control post-intervention (p = 0.012); total β-catenin unchanged; ratio of active/total decreased significantly (p = 0.009)	30	81.1	High risk
478	2015	ACTRN12611000075987	Australia	GDM	High-income	Mater Hospital Golden Casket Nursing & Midwifery Scholarship; Mater Foundation Research Grants; Mater Health Services; Australian Postgraduate Award; University of Queensland support	31	Two-arm parallel RCT	Single tertiary maternity hospital	Outcome assessor blinded for data analysis; participants unblinded	Stratified, variable block computer-generated list; independent service	Yes – opaque sealed envelopes	Yes – ITT explicitly stated	Some missing (fasting insulin, body comp), complete-case used; ITT retained all randomized	Weight change: −2.5 kg vs 0.0 kg (P=0.002); BMI −0.9 vs 0.0 (P=0.002); Waist −3.0 vs 0.5 cm (P=0.037); Hip −3.0 vs 0.0 cm (P=0.006); Physical activity ↑135 min/week (NS); HOMA-IR no change	31	83.8	High risk
479	2025	NCT03749109	Poland, Germany, Denmark	Endometriosis	High-income	Ferring Pharmaceuticals	67	Randomized, double-blind, placebo-controlled Phase 2 trial	Multicenter (6 sites across 3 European countries)	Double-blind (participants, investigators, radiologists, staff, MRI analysts)	Computer-generated via IRT system	Fully concealed via independent randomization system	Yes (ANCOVA ITT with multiple imputation)	Multiple imputation for MRI missing data; worst-case for AE causality	Primary outcome: No difference in total lesion size (all p > 0.3). Post hoc: greater lesion volume regression ≥65% in quinagolide (61.3% vs 35.5%, p=0.04), especially DIE subgroup (36.8% vs 7.7%, p=0.02). Prolactin reduced early but not sustained. No PRO or pain differences.	34	91.9	Some concerns
480	2022	ClinicalTrials.gov NCT01675310	Mexico	GDM	Upper-middle-income	CONACYT (Mexico, Grant No. 151819); Instituto Nacional de Perinatología	90	Parallel, open-label, randomized controlled trial	Single-centre (Instituto Nacional de Perinatología, Mexico City)	Open-label (participants and clinicians unblinded; assessors blinded)	Computer-generated randomization using opaque sealed envelopes	Yes – sealed opaque envelopes by independent researcher	Yes	Complete-case analysis; 2 lost to follow-up per arm	GDM: 24.4% vs 15.5% (RR 1.57, 95% CI 0.67–3.68, p=0.42); similar GWG (9.8 vs 10.0 kg); no differences in preeclampsia, preterm birth, or neonatal outcomes	33	89.2	High risk
481	2007	Not registered (pre-ICTRP era)	United States	GDM	High-income	Novo Nordisk Inc. (industry-supported); Sansum Diabetes Research Institute	27	Parallel, open-label randomized controlled trial	Single-centre (Sansum Diabetes Research Institute, Santa Barbara, CA)	Open-label (clinicians/participants unblinded; lab assessors blinded)	Computer-generated randomization (1:1)	Yes – sealed opaque envelopes	Yes – intent-to-treat with LOCF for HbA1c	Last observation carried forward	↓ glucose AUC (p=0.003) and C-peptide (p=0.027) with IAsp vs HI; HbA1c ≤6% both groups; mean peak glucose 5.4 vs 6.2 mmol/L (p<0.01); no difference in HbA1c or insulin dose; no macrosomia; similar neonatal weight (3.1 vs 3.0 kg)	29	78.4	Some concerns
482	2023	TCTR20210330001	Thailand	GDM	Upper-middle-income	Navamindradhiraj University Research Fund; Faculty of Medicine Vajira Hospital Fund	280	Parallel 1:1 RCT	Single tertiary university hospital	Outcome assessors blinded; participants & counselors unblinded	Computer-generated permuted blocks (2,4,6)	Sealed, opaque, sequentially numbered envelopes handled by independent assistant	Yes — ITT analysis	Women who missed postpartum visit were contacted; no imputation; outcome determined via EMR or phone	Postpartum glucose screening: 86.4% vs 50.7% (aRR 1.70, 95% CI 1.27–2.28); Highly effective contraception: 59.3% vs 30.7% (aRR 1.90, 95% CI 1.31–2.74); Any contraception: 87.1% vs 55.0% (aRR 1.58, 95% CI 1.19–2.10)	32	86.5	Some concerns
483	2023	NCT02763150	USA	GDM	High-income	NICHD R01HD084282	199	Parallel 1:1 RCT	Two clinical research centers (California, Rhode Island)	Assessment staff blinded; participants/interventionists unblinded	Stratified randomisation (site, prediabetes status, previous GDM diagnostic method)	Not explicitly stated; standard REDCap-based assignment implied	Not clearly stated; primary analysis excluded those without validated GDM measure	Excluded those not pregnant or without proper GDM measure; no imputation described	Weight loss 4.8 kg vs 0.7 kg at 16 weeks (p=.001); GDM recurrence 57.9% vs 44.0% (OR 1.84, CI 0.59–5.8); ≥5% weight loss 50% vs 13.6%	31	83.8	Some concerns
484	2022	RBR-78qtwy	Brazil	PCOS	Upper-middle-income	São Paulo Research Foundation (FAPESP 2015/14031-0, 2018/08569-6, 2018/17892-5)	75	Randomized controlled trial (3-arm)	Single-center (Ribeirão Preto Medical School, University of São Paulo)	Open-label (no participant or investigator blinding)	Blind draw assigning numbers 1–3	Not reported	No (per-protocol: 75 analyzed)	Dropouts excluded; no imputation	VO₂peak ↑ in both MICT & HIIT; testosterone ↓ in both; symbolic HRV analysis showed ↑ vagal modulation in MICT & HIIT; no differences between MICT vs HIIT for any autonomic or metabolic parameter	30	81.1	Some concerns
485	2025	TCTR20240805007	Thailand	GDM	Upper-middle-income	Not stated (academic departmental funding, Chiang Mai University)	143	Randomized controlled trial	Single tertiary centre (Maharaj Nakorn Chiang Mai Hospital, Chiang Mai University)	Open-label (participants and clinicians unblinded; analysts blinded)	Computer-generated random number table (1:1 ratio)	Yes – opaque sealed envelopes opened by blinded assistant	No (per-protocol)	7/150 excluded for incomplete data; complete-case analysis	GDM prevalence: 33.3% vs 11.3% (p=0.002; RR 2.96, 95% CI 1.43–6.14); no sig. difference in maternal or neonatal outcomes (macrosomia, preterm, preeclampsia, cesarean, NICU admission all p>0.05)	32	86.5	Some concerns
486	2007	Linked to ACHOIS Trial (NCT00115913)	Australia	GDM	High-income	ACHOIS funded by National Health and Medical Research Council (NHMRC), Australia	95	Parallel randomised controlled trial (ACHOIS substudy)	Multicentre (Australia)	Not stated; likely open-label	Computer-generated randomisation per ACHOIS protocol	Yes – sealed opaque envelopes by independent statistician	Not reported	Not described	Treated mild GDM group had lower cord glucose and leptin, higher adiponectin/leptin ratio than untreated; untreated GDM showed altered fetal axis	31	83.8	High risk
487	2014 (online 2013)	Not reported	Italy	PCOS	High-income	None declared; authors state no financial/proprietary interests	50	Double-blind randomized controlled trial	Single center (University of Messina)	Double-blind (participants and investigators blinded)	Randomized into two groups (method not described beyond “randomized”)	Not explicitly described	No ITT; per-protocol only	No imputation; all participants with complete data analyzed	Within-group findings:• Both MYO & DCI improved LH, LH/FSH, total & free testosterone, androstenedione, prolactin, SHBG, HOMA, glucose/IRI ratio.• DCI reduced Ferriman–Gallwey (hirsutism) more markedly.Between-group differences:• MYO superior for metabolic improvements: ↓LH/FSH (p=0.003), ↓total testosterone (p=0.026), ↑SHBG (p=0.042), ↓HOMA (p=0.032).• DCI showed slightly greater (NS) improvemen…	29	78.4	Some concerns
488	2022	DRKS00012996	Germany	GDM	High-income	DZD; Else-Kröner Fresenius Foundation	66	Parallel randomized controlled trial	Multicentre (3 clinics)	Open-label	Computerized randomisation (Randoulette), stratified by centre	Yes – central randomisation	Modified ITT	Complete-case; no imputation	Primary: 22% vs 11% achieved ≥3 DPP goals (p=0.47). Per-protocol: ↑fiber intake (+2.7 g/1000 kcal, p=0.03); small nonsignificant improvements in VO₂peak, weight, stress; 0 vs 2 developed diabetes	31	83.8	Some concerns
489	2020	IRCT20140907019082N9	Iran	PCOS	Upper-middle-income	Vice-Chancellor for Research, Tabriz University of Medical Sciences (Grant 59918); Iran National Science Foundation (Grant #96013888)	48	Randomized double-blind placebo-controlled trial	University-affiliated gynecology, infertility, and polyclinic centers	Double-blind (participants, investigators, analysts)	Block randomization using Random Allocation Software (age and BMI strata)	Yes – allocation concealed from participants and investigators until analysis	Not explicitly stated	Complete-case analysis; dropouts reported; no imputation	Greater reductions with thylakoid vs placebo: weight −6.97 vs −3.19 kg (P<0.001), WC −7.78 vs −3.73 cm (P<0.001), insulin −5.40 vs −1.19 μU/mL (P<0.001), HOMA-IR improved; total testosterone significantly reduced in thylakoid group	34	91.9	Some concerns
490	2021 (online Sept 2020)	Not reported	India	PCOS	Lower-middle-income	No financial relationship stated; free drug samples provided by Eris Lifesciences Ltd. & Akumentis Healthcare Ltd.	116	Randomized controlled trial	Single tertiary referral infertility center (AIIMS New Delhi)	No blinding—open-label	Computer-generated randomisation table	Not described; likely open allocation	No ITT—per-protocol only	Dropouts excluded (7 in Group I, 4 in Group II); conception before 3 months excluded from metabolic analysis; no imputation	Clinical pregnancy at 6 months: 42.0% vs 45.5% (RR 0.92, CI 0.60–1.43, NS); ongoing pregnancy 40% vs 41.8%; multiple gestation 2 vs 1; similar metabolic improvements in both groups	30	81.1	Some concerns
491	2020	IRCT20140406017139N3	Iran	PCOS	Upper-middle-income	Alborz University of Medical Sciences; Endocrinology and Metabolism Research Institute (Tehran University of Medical Sciences)	80	Randomized, double-blind, placebo-controlled clinical trial	Multicenter (three university hospitals in Tehran)	Double-blind (participants, investigators, outcome assessors)	Block randomization (1:1), blocks unspecified	Identical placebo capsules; allocation concealed	Yes — analysis stated as ITT	No imputation; all available data analyzed; dropouts remained in ITT	No significant changes in testosterone, SHBG, FAI, DHEA, LH, metabolic parameters; FSH increased slightly in oligopin vs placebo (p=0.03); ALP increased more in placebo vs oligopin (p=0.01); no other significant differences	33	89.2	Some concerns
492	2024	ClinicalTrials.gov NCT05123248	Singapore	GDM	High-income	Integrated Platform for Research in Advancing Metabolic Health Outcomes in Women and Children (IPRAMHO) – Singapore Ministry of Health’s National Medical Research Council (NMRC/CG/C008A/2017_KKH)	206	Prospective pilot randomized controlled trial	Single-centre (KK Women’s and Children’s Hospital, Singapore)	Open-label (participants aware; assessors blinded)	1:1 randomization via opaque envelopes	Yes – opaque envelope concealment	Yes – ITT	<3% missing covariates; complete-case analysis	GDM: 21.5% vs 14.9% (RR 1.49, 95% CI 0.70–3.18, p=0.30); OGTT FPG 4.2 vs 4.3, p=0.48; %TIR higher at early-second (88.7% vs 80.5%, p=0.02) but not sustained; higher satisfaction in unblinded group (score 4.4 vs 4.1, p=0.002); no significant GV differences (SD, MAGE, %CV)	32	86.5	Some concerns
493	2025	NCT04554693	United States	Endometriosis	High-income	University of Louisville	88	Randomized, multicenter, double-blind, placebo-controlled	Two centers (University of Louisville; Norton Women’s & Children’s Hospital)	Double-blind (participants, investigators, assessors, pharmacist, statistician)	Computer-generated (sealedenvelope.com), blocks 6–10	Opaque sealed envelopes prepared by pharmacist	Not explicitly stated as ITT; complete-case analysis (72 analysed)	Lost to follow-up/discontinuation ~18%; analysed complete cases	Primary: pain persistence 16% MTZ vs 12% placebo (OR 1.40, 95%CI 0.30–7.43, p=.74) — no benefit. Secondary: no differences in VAS, EHP-5, FSFI. Both groups improved vs baseline.	34	91.9	High risk
494	2010	Not reported	Italy	PCOS	High-income	Not reported	120	Randomized controlled trial	Single-centre university hospital IVF unit	Open-label	Randomized (method not detailed); ITT stated	Not described	Yes – ITT stated	Dropouts reported; no imputation described	Spontaneous ovulation: 50% metformin vs 65% MYO; total pregnancy rate: 36.6% vs 48.4% (NS); shorter follicular phase with MYO (p=0.003)	28	75.7	Some concerns
495	2011	NCT00529542	USA	PCOS	High-income	NIH Grants (K12HD055882, GCRC M01 RR10732, C06 RR016499), Pfizer research grant; Pfizer provided atorvastatin	20	Double-blind randomized placebo-controlled trial	Single-center (Penn State Hershey Medical Center)	Participants, intervention administrators, and outcome assessors all blinded (double-blind)	Permuted block randomization, generated by biostatistician	Yes – pharmacist over-encapsulated pills; investigators blinded	Yes, stated explicitly: intention-to-treat analysis used	not reported	Significant reductions: diastolic BP, LDL, total cholesterol, triglycerides, androstenedione, DHEAS; hsCRP ↓ within group; insulin AUC ↑; FMD ↓ (not significant); BAC ↑ (not significant)	31	83.8	Some concerns
496	2014	NCT00907153	USA	PCOS	High-income	Penn State College of Medicine Dean’s Feasibility Grant; NIH NCATS UL1TR000127; BTR Group provided drug/placebo	28	Randomized double-blind placebo-controlled trial	Single academic medical center	Double-blind	Permuted blocks (size 2), stratified by OCP use	Allocation via pharmacist; participants, coordinator, and investigators blinded	Yes – ITT analysis followed	No imputation; complete cases analyzed; sensitivity analysis similar	↑25OHD: +45.6 ng/mL vs placebo +1.3 (p<0.001); no significant QUICKI difference; 2-hr insulin ↓62 μIU/mL (p=0.05) within vitamin D; DBP protective effect (between-group p=0.02)	30	81.1	High risk
497	2024	IRCT20170611034452N9 (registered 25/01/2020)	Iran	PCOS	Upper-middle-income	Kerman University of Medical Sciences (Grant 98000704)	66	Randomized, single-blind, parallel-arm RCT	Multiple healthcare centers and women’s/midwifery clinics affiliated with Kerman University of Medical Sciences	Single-blind: MBAT (8 online sessions, 90–120 min, twice weekly, 4 weeks) vs waiting-list control	Random number table; selection using pen-point method	Outcome assessors and statistical analysts blinded; participants and facilitators not blinded	MCAR pattern; 9.9% missing; no imputation	Body image improved significantly: adjusted mean difference 29.22 (95% CI 19.54–38.90) post-intervention; 34.77 (95% CI 24.75–44.80) at one-month; large effect sizes (partial eta² 0.39–0.46). BASS, AE, HO domains showed largest improvements	None reported	29	78.4	High risk
498	2023	IRCT138707081281N1	Iran	GDM	Upper-middle-income	National Institute for Medical Research Development (Grant IR.NIMAD.REC.1394.013); Research Institute for Endocrine Sciences, Shahid Beheshti University of Medical Sciences	28771	Cluster randomized community trial (non-inferiority design)	Multicentre (five provinces, national health system)	Outcome assessors blinded	Cluster randomisation by geographic region and city (five strata)	Yes – randomisation sequence centrally assigned per province	Yes – intention-to-treat	Complete-case analysis; cluster effect adjusted	GDM: 9.3% vs 5.4% (p<0.001); Macrosomia RR=0.96 (0.64–1.45), Cesarean RR=1.04 (0.88–1.23), Preterm RR=1.06 (0.98–1.15), NICU RR=0.86 (0.64–1.17), all ns	36	97.3	Some concerns
499	2022	ISRCTN84389045; ISRCTN13389832	Spain	GDM	High-income	Instituto de Salud Carlos III (PI20/01758); Ministerio de Ciencia e Innovación (PREDIGES RTC2019-007406-1); FEDER (EU)	1573	Parallel randomized controlled trial with nested genetic analysis + real-world arm	Single-centre (Hospital Clínico San Carlos, Madrid)	Open-label (dietary intervention; laboratory analysis blinded)	Computer-generated randomization (1:1, CG vs intervention)	Yes – random sequence applied by statistician	Yes	High completion (>90%); exclusions by genotype QC (<5%)	40 SNPs significantly associated with GDM (e.g., IGF2BP2, MTNR1B, GLP2R, PDX1 ↑ risk; GCKR, GLIS3 ↓ risk); MedDiet reduced GDM risk across genotypes (OR<1, p<0.05, q<0.05)	34	91.9	Some concerns
500	2018	ACTRN12614000934640	Australia	GDM	High-income	Northern Foundation small project grant; Australian Postgraduate Award; Melbourne Networked Society Institute scholarship	95	Randomised controlled trial	Single tertiary hospital + linked community services	Not blinded (clinicians required access to data)	Computer-generated schedule by independent biostatistician	Concealed in opaque envelopes	Yes – intention-to-treat stated	SMBG data incomplete for intervention group; missing data not imputed	IRR for appointments; HR 1.71 for time to insulin control; no difference in birth outcomes	28	75.7	High risk
501	2009	Not reported	Iran	PCOS	Upper-middle-income	Tehran University of Medical Sciences	60	Randomized clinical pilot trial (3-arm parallel)	Single university reproductive health center	Open-label	Random number table	Not reported	No	Complete-case analysis	Menstrual regularity: 30% (Ca-VitD) vs 50% (Ca-VitD+Met) vs 35% (Met), p=0.40. Dominant follicles ≥14 mm (GEE): Ca-VitD+Met vs Ca-VitD β=0.6995, OR≈2.01, p=0.037; Ca-VitD vs Met NS (p=0.2896). Follicular response ≥14 mm at month 6: 21.1% vs 26.3% vs 15.8%. Pregnancy: 0 in all groups.	24	64.9	Low risk
502	2020	ClinicalTrials.gov NCT03835208	Denmark	GDM	High-income	Vissing Fonden, Kirsten Dyrlev Madsens Grant, University of Copenhagen, Novo Nordisk Foundation, Danish Diabetes Academy	12	Randomized crossover clinical trial	Single-centre (Aarhus University Hospital)	Single-blind (investigators blinded; participants aware)	REDCap web-based randomization (balanced 1:1)	Yes – blinded allocation key created independently	No (per-protocol)	Complete dataset; no imputation	MAGE ↑0.7 mmol/L (p=0.004); CV ↑5.1% (p=0.01) in HCM vs LCM; Mean glucose ↓0.3 mmol/L (p=0.02); FBG ↓0.4 mmol/L (p=0.01); HOMA-IR ↓0.214 (p=0.02); no lipid or CRP changes	29	78.4	Some concerns
503	2008	Not specified (DPP registered as NCT00004992)	United States	GDM	High-income	National Institutes of Health (NIDDK, NICHD, NIA, CDC, ADA, IHS, others)	2190	Parallel, three-arm RCT (DPP subset analysis)	Multicentre (27 U.S. academic & Indian Health Service sites)	Open-label (participants & staff); outcome assessors blinded	Central randomisation (computer-generated, stratified by site)	Yes – independent DCC concealed allocation	Yes – ITT used for all outcomes	Missing data handled by mixed models; sensitivity analyses for attrition	Incidence of diabetes/100 person-yrs: 15.2 (GDM placebo) vs 8.9 (non-GDM placebo); risk reduction 53% (ILS) and 50% (metformin) in GDM group; NNT=5–6 over 3 years	31	83.8	Some concerns
504	2007	Not reported	Finland	PCOS	High-income	Academy of Finland; Sigrid Jusélius Foundation; Oulu University Hospital	30	Randomized double-blind placebo-controlled trial	University hospital gynecology & endocrinology departments	Double-blind (participants and investigators)	Random allocation to rosiglitazone or placebo	Yes – identical placebo tablets	No – per-protocol analysis	Dropouts excluded; completers analyzed	CRP: 4.7±0.81 → 3.6±0.50 mg/L (p<0.05 within group; p=0.07 vs placebo). WBC: 5.6±0.39 → 5.0±0.51 ×10⁹/L (p<0.01 within; p=0.03 vs placebo). ALT: 43.5±9.33 → 27.4±5.34 U/L (p<0.02). Total cholesterol: 208.8±0.14 → 201.1±0.18 mg/dL (NS). Triglycerides: 177.0±0.40 → 168.2±0.28 mg/dL (NS). HDL-C: 46.4±0.06 → 42.5±0.12 mg/dL (NS). Blood pressure: no significant change. Placebo showed no significant ch…	27	73	High risk
505	2019	NCT00894946	New Zealand & India	Endometriosis	Mixed Income	Auckland District Health Board Research Fund; University of Auckland Research Committee; Auckland Medical Research Foundation	70	Randomised controlled trial	Multicentre (IVF clinics in NZ and Pune, India)	Open-label (not possible to blind participants/clinicians)	Computer-generated blocks of 10; stratified by endometriosis	Opaque, sequentially numbered, sealed envelopes	Yes (ITT fully reported)	Minimal missing data; complete follow-up for all 70; protocol breach (1 crossover)	Live birth after fresh IVF: Lipiodol 24% vs IVF-only 30% (RR 0.81); live birth ≤6 months: 33% vs 32%; no significant differences; no adverse events	30	81.1	Some concerns
506	2017	NCT02080377	United Kingdom	GDM	High-income	Chief Scientist Office, Scotland (CZH/4/1011); Tommy’s	23	Feasibility open-label randomised controlled trial	Multicentre (5 NHS hospitals in Scotland)	Open-label; outcome assessors unblinded	Web-based minimisation algorithm (NPEU CTU, Oxford)	Yes – web-based concealed allocation	Yes – intention-to-treat	Complete-case (no imputation; 100% retention)	Recruitment rate: 0.39 women/centre/month; adherence 69.2% (9/13); no severe hypoglycaemia; higher glucose excursions <3.5 mmol/L in glibenclamide group (median diff 0.58/woman/week); 2 neonatal hypoglycaemia cases (glibenclamide)	26	70.3	Some concerns
507	2020	ISRCTN10416750	Brazil	PCOS	Upper-middle-income	São Paulo State Research Foundation (FAPESP 2015/14031-0)	110	Prospective 3-arm randomized controlled trial	University hospital outpatient clinic + physiology lab	Unblinded (exercise intervention)	Block randomisation (blocks of 15), stratified by BMI; opaque sealed envelopes	Yes – opaque sealed envelopes	Not stated	Complete-case analysis; 23 dropouts excluded	CAT: ↓TC, ↓LDL-C, ↓testosterone; IAT: ↓WC, ↓WHR, ↓testosterone, ↓FAI; CG: ↑fat %, ↑WC; no change in HOMA-IR	31	83.8	High risk
508	2021	ReBec RBR-78qtwy; ISRCTN10416750	Brazil	PCOS	Upper-middle-income	FAPESP; CNPq; CAPES; INCT (Brazil)	110	Three-arm parallel-group RCT	Single academic hospital	No blinding (open-label exercise)	Stratified (by BMI) block randomization; opaque sealed envelopes	Opaque sealed envelopes	No	Complete-case; no imputation; 23 dropouts prior to completion	No change in telomere length (CAT p=0.69; IAT p=0.91). Testosterone decreased CAT p≤0.001; IAT p=0.019. CAT reduced WC (p=0.045), HC (p=0.032), cholesterol (p≤0.001), LDL (p=0.03). IAT reduced WC (p=0.014), WHR (p=0.012), FAI (p=0.037). Control group WC ↑ (p=0.049), body fat ↑ (p=0.015).	32	86.5	Some concerns
509	2005	not reported	Egypt	PCOS	Upper-middle-income	not reported	150	Placebo-controlled, double-blind randomized trial	University hospital and private infertility clinic	Double-blind (patients and monitoring physician)	Randomization using sealed envelopes by a third party (nurse)	Yes, through identical NAC/placebo sachets	not reported	not reported	Ovulation rate 49.3% vs 1.3%, Pregnancy 21.3% vs 0%, E2, progesterone, follicles significantly higher in NAC group	25	67.6	Some concerns
510	2024	NCT06506708	Spain	Endometriosis	High-income	Research Chair “Innovation + Research in Human Wellbeing” (University of Granada), Grant 2022/CH/01	44	Parallel-group RCT	Single main center (hospital recruitment; intervention at Hammam Al Ándalus spa facility)	Assessors/statisticians/data managers blinded; participants & practitioners unblinded	Simple computer-generated sequence; independent researcher	Opaque, numbered envelopes opened by PI after baseline	Yes—formal ITT analysis stated	No missing data; 100% adherence; no imputation needed	Significant improvements in HAMMAM group: ↓ dysmenorrhea (d=0.80), ↓ dyspareunia (d=0.62), ↓ sleep interference (d=0.74), ↑ pelvic PPTs (d=0.70–0.91). No improvements in well-being or overall QoL except sleep subscale.	33	89.2	High risk
511	2020	NCT01581359	Spain	Endometriosis	High-income	Ferring Pharmaceuticals (insurance only; no role in design/analysis)	200	Randomized, placebo-controlled clinical trial	Single tertiary reproductive centre	Single-blind (patients & clinicians blinded; 2 researchers unblinded for drug administration)	Computer-generated block randomization in blocks of 4	Opaque sealed envelopes	Per-protocol only (not ITT)	17 dropouts removed: exclusions, withdrawals, protocol deviations, mild adverse events	CPR 25.3% vs 33.7% (p=0.212); cumulative LBR 22.0% vs 33.7% (p=0.077); higher cancellations in GnRHa group (11% vs 3.3%); ↑ immature oocytes (p=0.003); ↓ testosterone FF (p<0.001); no CYP19A1 differences	30	81.1	High risk
512	2013	not reported	Denmark	PCOS	High-income	not reported	17	Randomized cross-over design	Single-centre (Odense University Hospital / University of Southern Denmark)	not blinded	not reported	not reported	Not performed; per-protocol (14/17 completed)	No description; excluded dropouts	↓ waist (p=0.002); ↓ weight (p=0.023); ↓ BMI (p=0.024); ↑ VO₂max (p<0.001); changes differed slightly by sequence	22	59.5	Some concerns
513	2018	NCT01291576	France	Endometriosis	High-income	PHRC (French Hospital Clinical Research Program)	60	Randomized controlled parallel-arm surgical trial	Three French university hospitals (Rouen, Paris–Tenon, Lille)	Unblinded (patients informed of allocation; surgeons unblinded)	Sequentially numbered opaque sealed envelopes; center-specific randomization lists; block size concealed	Yes—opaque sealed envelopes; fax confirmation required before inclusion	Yes—intention-to-treat used	No missing data; all 60 included; complete 24-month follow-up	Primary endpoint: 48.1% (A) vs 39.4% (B) functional problems; OR 0.70 (95% CI 0.22–2.21, p=0.70). Secondary: no significant differences in GIQLI, KESS, Wexner, USP, SF-36. Stenosis higher in segmental group: 5 cases (15.2%, p=0.05). Pregnancy: 69.2% vs 52.4% (NS).	35	94.6	Some concerns
514	2019	NCT01291576	France	Endometriosis	High-income	Clinical research programme for hospitals in France (initial study); No specific funding for 5-year extension; Open-access supported by SELARL du Dr Roman	55	Parallel-arm randomized controlled trial (unblinded)	Multi-centre RCT; 5-year follow-up at a single tertiary endometriosis centre	Unblinded (surgeons and patients aware of allocation)	Preoperative sequentially numbered, opaque, sealed envelopes; centre-specific allocation lists created by independent statistician	Adequate — opaque sealed envelopes	Yes — all 55 analysed for primary endpoint	No imputation; missing data due to stoma non-closure; one withdrawal retained in ITT	Primary endpoint: 44.4% (excision) vs 60.7% (resection), P=0.29. Recurrence: 3.7% vs 0% (P=1). Quality of life: GIQLI, KESS, SF-36 significantly improved by 6–12 months and remained stable through 5 years, no arm differences. Additional surgery: 25.9% vs 28.6% (P=0.80).	34	91.9	High risk
515	2010	not reported	Italy	PCOS	High-income	not reported	23	Randomized, placebo-controlled trial (RCT)	single centre	Double-blind not explicitly mentioned	not reported	not reported	not reported	No missing data reported	Menstrual cyclicity restored in 75% of metformin group; ovarian volume and S/A ratio decreased; androgen levels decreased in 10/13 patients	23	62.2	High risk
516	2023	IR.TUMS.MEDICINE.REC.1400.1085	Iran	Endometriosis	Upper-middle-income	Not reported	50	Randomized, triple-blind, placebo-controlled clinical trial	ART clinic	Triple-blind (patients, clinicians, outcome assessors)	Randomization	not specified	not reported	not reported	Significant improvements in number of oocytes retrieved (14.60 ± 7.79 vs 9.84 ± 6.44; P = 0.043), MII oocytes (10.48 ± 6.665 vs 6.72 ± 4.3; P = 0.041), high-quality embryos (4.52 ± 2.41 vs 2.72 ± 2.40; P = 0.024). No significant differences in fertilization rate, transferred embryos, or pregnancy rates. Correlations observed between serum and FF oxidative stress/inflammatory markers and ART	28	75.7	Some concerns
517	2006	NR	Saudi Arabia	PCOS	High-income	Supported by King Abdulaziz University (Grant No. 012/422). No pharmaceutical company funding	25	Randomized controlled, parallel-group trial, open-label with biochemical outcomes.	Single university teaching hospital.	NR	Computer-generated random table; allocation by sealed opaque envelopes opened by research nurse.	Yes — sealed envelope method.	Yes — authors explicitly state analysis was performed according to the intention-to-treat principle.	Not applicable (all randomized participants completed follow-up).	Ovulation rate: 64.3% (18/28 cycles) rosiglitazone+CC vs 36.4% (12/33 cycles) metformin+CC (p = .035). Follicles ≥14 mm: 2.2 ±1 vs 1.1 ±0.9 (p = .02). E2 day 12: 1991 ±1389 vs 548 ±327 pmol/L (p < .001). Pregnancy rate: 50% vs 38.5% (NS). Metabolic: Significant ↓ insulin, HOMA; ↑ GIR in both groups; ↓ androgens and ↑ SHBG in both groups.	27	73	Some concerns
518	2015	not reported	China	Endometriosis	Upper-middle-income	not reported	100	Randomized controlled trial	Hospital-based (Panyu HeXian Memorial Hospital, Guangzhou)	not specified	Random allocation into control and research groups (50 each)	not reported	not reported	not reported	Post-op CA125 significantly lower in laparoscopy group; surgery time, bleeding volume, hospitalization, incision length significantly better in laparoscopy group (p<0.05)	21	56.8	Some concerns
519	2019	Not reported	Iran	PCOS	Upper-middle-income	No specific funding received	88	Randomized double-blind placebo-controlled clinical trial	University-affiliated nutrition and gynecology clinics	Double-blind (participants and investigators)	Computer-generated random numbers	Yes – concealed from participants and researchers until final analysis	No – per-protocol analysis	Participants with >10% non-compliance excluded; no imputation	Significant increases in TAC (+1.15 vs −0.60 mg/dL, P<0.001), catalase activity (+1.19 vs +0.12 IU/L, P<0.001), glutathione (+1.5 vs +0.23 μmol/L, P=0.028), and reduction in MDA (−0.34 vs +0.57 nmol/L, P=0.008) vs placebo	28	75.7	Some concerns
520	2022	NCT04273412	United Arab Emirates	GDM	High-income	Sheikh Khalifa Medical City Ajman	63	Parallel, open-label pragmatic randomized controlled trial	Single-centre (Sheikh Khalifa Medical City, Ajman)	Statistician and research assistant blinded; participants and dietitians unblinded	Computer-generated random numbers (block size 4)	Yes – concealed from recruiters	Yes – ITT	Minimal missing data; <10% dropout	GDM incidence 33.3% vs 57.5% (RR 0.59, 95% CI 0.32–1.04, p=0.05); adjusted OR=0.26 (95% CI 0.07–0.92, p=0.04); ↓ calorie intake (−120 kcal/day, p<0.01); ↓ fat (−5 g/day, p=0.03); ↑ physical activity (+52 min/wk, p=0.05); no difference in birth weight or cesarean rate	31	83.8	High risk
521	2017	NCT00474851	USA	Endometriosis	High-income	NICHD T32 HD043034, NICHD K23 HD060066, NIH UL1 RR-025758, Boston Children’s Hospital CTSU, McCarthy Family Foundation, Thrasher Research Fund, Marriott Foundation	50	Randomized, double-blind, placebo-controlled clinical trial	Pediatric gynecology clinic, Boston Children’s Hospital	Double-blind (participants & study staff blinded to add-back assignment)	Computer-generated randomization	Pharmacy-controlled blinded medication allocation	Yes — ITT followed	Missing follow-up questionnaires included via repeated-measures modeling; no imputation needed	QoL improved in both groups. NA+CEE superior for: PCS (+10 vs +6), bodily pain improvement (+12 vs +8), vitality, and social functioning (all pbetween <0.05). No changes in BDI or MRS scores in either group.	32	86.5	High risk
522	2016	ISRCTN62811278	India	GDM	Lower-middle-income	Wellcome Trust (UK); UK Medical Research Council; UK Department for International Development; Parthenon Trust (Switzerland); ICICI Bank Social Initiatives Group (India)	6513	Parallel, individually randomized, controlled trial	Community-based (61 local centers in Mumbai slums)	Single-blind (participants unblinded; outcome assessors blinded)	Individual randomization, stratified by age and BMI	Yes – outcome assessors and laboratory staff blinded	Yes – intention-to-treat and per-protocol analyses	50% OGTT completion; no imputation; complete-case analysis	GDM: 7.3% vs 12.4% (OR 0.56, 95% CI 0.36–0.86, p=0.008, WHO 1999 criteria); no difference using WHO 2013 criteria (8.9% vs 11.1%); effect independent of adiposity	33	89.2	High risk
523	2019	NCT03236740	India	PCOS	Lower-middle-income	No external funding (authors report no grant funding)	101	Randomized controlled open-label trial	Single centre (SCB Medical College, Cuttack, India)	Open-label; Doppler assessor blinded to clinical data	Simple randomization using random number table	Not described; no explicit allocation concealment	No ITT (dropouts excluded)	Excluded 15 withdrawals (side effects/moved away); complete-case analysis	OCP ↓ LH, TT, DHEAS more strongly; Metformin ↓ BMI, WC, FG, FIN, HOMA-IR; both ↑ PI/RI; OCP stronger increase in PI; significant negative correlations between Doppler indices and LH/TT (OCP) and fasting insulin (metformin)	27	73	Some concerns
524	2025	IRCT20240305061171N1	Iran	PCOS	Upper-middle-income	No funding	42	Double-blind parallel RCT	Single-centre (tertiary hospital, Tehran University of Medical Sciences)	Double-blind (participants, physicians, outcome assessors)	Block randomization (block size 4)	Sequentially numbered, sealed opaque envelopes	No explicit ITT; per-protocol used (2 withdrawals excluded)	2 withdrawals (HCQ group) excluded from analysis; no imputation	OHSS incidence similar: Day 3 mild 31.6% vs 42.9%, moderate 15.8% vs 9.5%. Day 5 mild 1 patient each group. OR for OHSS non-significant; NNT 20 (Day 3); NNH 200 (Day 5).	30	81.1	Some concerns
525	2018	NTR1848	Netherlands	GDM	High-income	DSM Food Specialties (industry)	52	Double-blind RCT	Single centre (Erasmus MC outpatient clinic)	Double blind (participants + investigators)	Block randomisation	Yes — separated generation, concealment & implementation	No	NR	Means, SD, SEM, ranges, AUC values, p-values; figures (pp. 881–883)	29	78.4	High risk
526	2021	Not reported	Iran	PCOS	Upper-middle-income	None (authors report no financial conflicts)	212	Randomized controlled trial	Single-centre (Royan Institute, Tehran)	Open-label (no blinding)	Computer-generated random list	Unconcealed allocation (stated explicitly)	Yes — “analysis conducted on ITT basis”	<10% loss; complete-case analysis; no imputation	Live birth: 21.7% (GnRH) vs 22.1% (no-GnRH), OR 0.97 (95% CI 0.48–1.93). Clinical pregnancy: 31.2% vs 33.7%. Miscarriage: 9.7% vs 11.6%. Implantation rate: 0.58 vs 0.51. No significant group differences.	30	81.1	Some concerns
527	2018	RBR-9rpqdn; UTN U1111-1162-6908	Brazil	GDM	Upper-middle-income	Not stated (public hospital–based study)	164	Parallel randomized controlled trial	Single-centre (public maternity hospital, Joinville)	Open-label	Computer-generated randomisation using Microsoft Excel, non-fixed allocation	Not described	No (per-protocol)	Complete-case; no imputation	GDM incidence: 15.9% metformin vs 19.5% control (p=0.683); Absolute risk reduction 3.6% (95% CI –8.0 to 15.32); BMI change identical (1.0 vs 0.9 kg/m², p=0.63); OGTT glucose values similar at fasting, 1h, 2h	27	73	Some concerns
528	2007	not reported	Norway	PCOS	High-income	Norwegian Women’s Public Health Association; Metformin provided free of charge by Weifa A/S	40	Randomised, double-blind, placebo-controlled trial	Single centre (Trondheim University Hospital, Norway)	Double-blind: participants and clinicians (including ultrasonographer) blinded to treatment	Sealed opaque envelopes, block randomisation in blocks of 10; stratified by metformin use at conception	Sealed, sequentially numbered envelopes prepared by independent pharmacist	Yes for pregnancy outcomes; Doppler analyses used available data only	Missing Doppler values due to non-attendance or preterm delivery; no imputation; two withdrawals included in ITT for pregnancy outcomes	Uterine artery PI: Higher in metformin group at 12 wks (1.95 vs 1.58, p=0.02); Greater reduction 12→19 wks (p=0.03). No difference at 19–36 wks. Umbilical artery PI: No difference at any visit. Pregnancy complications: Severe complications only in placebo (7/22 vs 0/18, p=0.01). Overall complications: 10/22 vs 3/18 (p=0.09). Delivery outcomes: No differences in birth weight, Apgar, cord pH.	26	70.3	Some concerns
529	2024	ISRCTN16668711	UK	PCOS	High-income	Jon Moulton Charity Trust	80	Multicentre, open-label RCT	Two academic specialist obesity centres	Open-label (participants & clinicians); assessors/statisticians blinded	Computer-generated sequence (PLAN procedure, SAS), independent researcher	Adequate; independent randomisation, allocation separated from investigators	ITT & per-protocol both reported	Mixed models handle MAR; otherwise no imputation reported	IRR for ovulation 2.5 (95% CI 1.5–4.2, p<0.0007); large metabolic improvements in surgical group; QoL significantly higher	34	91.9	Some concerns
530	2023	TCTR20210524007	Thailand	GDM	Upper-middle-income	Thammasat University Research Fund; Thammasat University Hospital; Endocrine Society of Thailand; C.P. Foods	96	Triple-blind randomized controlled trial	Single-centre (Thammasat University Hospital Diabetes Center)	Triple-blind: participants, dietitian, and insulin-decision physician blinded	Permuted blocks (equal size) generated via Stata	Yes – dietitian, physician assessor, and participants blinded	No (per-protocol complete cases)	No imputation; complete-case analysis	Insulin required: 6.3% RD43 vs 22.9% THM (p=0.017); after switching THM → RD43, only 1/48 required insulin; FIR for 1-hr post-dinner glucose higher in RD43 (90.2% vs 84.9%, p=0.004); no differences in fasting glucose, obstetric or fetal outcomes	31	83.8	Some concerns
531	2016	NCT01047982	Italy	GDM	High-income	Not specified (institutional support from University of Messina and University of Modena & Reggio Emilia)	220	Open-label randomised controlled trial	Multicentre (University Hospitals of Messina and Modena)	Open-label (clinicians aware)	Computer-generated 1:1 random allocation list	Yes – sequentially numbered sealed opaque envelopes	Not explicitly stated, but per-protocol analysis conducted	Seven dropouts (≈3.2%); excluded listwise from analysis	GDM incidence 11.6% (myo-inositol) vs 27.4% (placebo), p = 0.004; adjusted OR = 0.33 (95% CI 0.15–0.70); no difference in macrosomia (1% vs 4.9%) or C-section (40% vs 48%)	25	67.6	Some concerns
532	2013	Not registered (trial completed before 2003)	United States	Endometriosis	High-income	NIH NICHD PO1-HD-35276-01A1	59	Randomized placebo-controlled trial	University-affiliated hospitals (Emory Clinic & Crawford Long Hospital)	Double-blind	Random assignment (method not detailed)	Not described	Not explicitly stated	Available-case analysis; no imputation reported	Chronic pelvic pain improved in 43% of antioxidant group vs 0% placebo (P=0.0055); dysmenorrhea ↓ in 37% vs 36%; dyspareunia ↓ in 24% vs 0%; RANTES (P≤0.002), IL-6 (P≤0.056), MCP-1 (P≤0.016) significantly reduced	29	78.4	High risk
533	2025	IRCT20221111056469N1	Iran	Endometriosis	Upper-middle-income	Zahedan University of Medical Sciences	86	Randomized, double-blind, placebo-controlled trial	University hospital (single centre)	Double-blind (participants, providers, assessors)	Block randomisation (variable block sizes 2–6), computer-generated (sealedenvelope.com)	Sequentially numbered, sealed, opaque envelopes	Yes — ITT used	One missing in intervention group; otherwise complete-case	Significant improvements with curcumin in dysmenorrhea (aMD −1.55), dyspareunia (−0.93), chronic pelvic pain (−1.55), dyschezia (−0.30), sciatica (−1.24); QOL improved (aMD −11.29); FSFI improved except orgasm; small reduction in left endometrioma (aMD −2.79). All p<0.05 except orgasm domain & right endometrioma	32	86.5	Low risk
534	2009	ISRCTN75758249	UK	PCOS	High-income	Not reported; institutional support (University of Hull)	20	Extension phase of randomized, open-label parallel RCT	Single endocrine clinic (Hull Royal Infirmary)	Open-label	Originally computerized random allocation in parent RCT	None (open-label extension)	No	Complete-case only; all 20 participants completed	Weight change at 6 months: −6.0% vs −2.8% (p=0.04). Testosterone ↓45% vs ↓16% (p=0.02). FAI ↓53% vs ↓17% (p=0.02). HOMA-IR ↓ from 4.4→3.4→2.7 (p<0.01) in rimonabant/metformin; no change in MET-only. Lipids improved in both groups; TG ↓ only in rimonabant/metformin.	24	64.9	Some concerns
535	2016	ACTRN12615000697583	Australia	GDM	High-income	Ian Potter Foundation	116	Randomised controlled trial	Single-centre maternity diabetes clinic	Unblinded	Computer-generated random numbers	Not described	No	Non-completers excluded	No significant differences overall; small improvements in certain knowledge domains	26	70.3	Some concerns
536	2007	Not reported	Israel	PCOS	High-income	Solgar Israel (partial lab cost support)	102	Prospective randomized controlled trial	IVF & infertility unit, tertiary referral center	None (open-label)	Sealed envelopes with computer-generated assignment (4-arm)	Yes — sealed opaque envelopes	No ITT; per-protocol	No missing data adjustments reported	Homocysteine ↓: Control −7%; Metformin −10.9%; Vitamins −32%; Metformin+Vitamins −18% (all significant). Pregnancy rates: Highest in vitamin groups (75–77%). Ongoing pregnancy: 61–67% in vitamin groups vs 50–61% in others. No significant differences in fasting glucose or insulin after treatment.	23	62.2	Some concerns
537	2020	ISRCTN 14115156	Italy	PCOS	High-income	University of Perugia grant	32	Prospective, randomized, parallel-group, open-label, controlled trial (vs no-treatment).	Single-centre	None – open-label study.	Computer-generated randomization list (2:1 allocation).	NR	NR	NR	• Significant Hcy reduction in treatment group: 11.91 → 8.12 μmol/L (−32%, p=0.003). • No change in control: 11.38 → 12.11 (NS). • AMH ↑ in treatment (p=0.029), ↓ in control (p=0.021). • Testosterone ↓ only in control (p=0.015). • SHBG ↓ only in those with normal baseline Hcy.	22	59.5	High risk
538	2006	Not reported	USA & Canada	Endometriosis	High-income	Pfizer Inc.	274	Phase 3 multicenter randomized comparator-controlled trial	50 clinical trial sites (USA & Canada)	Evaluator-blinded (participants unblinded to injection route)	Central randomization (1:1)	Yes – independent staff maintained code and administered injections	Yes – ITT population analyzed	Observed-case analysis; high but balanced dropout	Pain improvement (month 6): Equivalent in 4/5 symptoms (dysmenorrhea, dyspareunia, pelvic pain, tenderness; P≤0.02). Composite pain score change: −6.2 vs −7.7 (P<0.001 both). Pain improvement at 12-mo follow-up: 60% both groups. Lumbar spine BMD change (month 6): −1.10% vs −3.95% (P<0.001). Total hip BMD (month 6): −0.30% vs −1.65% (P<0.001). Hot flushes/day (month 6 median): 0 vs 1.9 (P<0.001). …	31	83.8	Some concerns
539	2024	NCT02327286	Brazil	GDM	Upper-middle-income	Eli Lilly Non-Communicable Diseases Partners Grant; Brazilian National Council for Scientific and Technological Development	466	Multicentre parallel randomized clinical trial	Six urban public hospitals in Brazil	Blinded assessors; participants and counsellors unblinded	Central computer-generated randomization (1:1), stratified by site, block sizes 4–6	Yes – concealed via automatic allocation through central data entry	Yes – ITT	Multiple imputation for missing OGTT; censoring for pregnancy	Diabetes incidence: 30.5% overall; 11.5 vs 13.2 per 100 PY (HR=0.84, 95% CI 0.60–1.19); weight gain 1.97 vs 2.94 kg (Δ=0.97, p=0.09); pre-COVID subgroup HR=0.71 (p=0.07)	35	94.6	High risk
540	2008	not reported	USA	Endometriosis	High-income	NIH/NCCAM Grant 5 U19 AT002022	18	Pilot, randomized, sham-controlled	Single center: Japanese Acupuncture Department, New England School of Acupuncture, Newton, MA	Blinded (patients and outcome assessors)	not reported	not reported	not reported	not reported	Good compliance; successful patient blinding; no serious adverse events; treatments well tolerated; 14/18 completed study	21	56.8	High risk
541	2013	Not reported	Brazil	Endometriosis	Upper-middle-income	CAPES; CNPq; Postgraduate Research Group (HCPA); FAPERGS (Brazil)	40	Randomized controlled trial	Single centre (Hospital de Clínicas de Porto Alegre)	Double-blind (patients, evaluators, clinicians)	Block randomization (block size 4)	Sequentially numbered, sealed, opaque envelopes	Yes—last observation carried forward	LOCF	Daily pain ↓39%; dysmenorrhea ↓38%; dyspareunia ↓23%; dyschezia ↓35%; dysuria ↓28%; sleep ↑22%; analgesic use ↓80%; BDNF ↓ compared with placebo	32	86.5	Some concerns
542	2014	NCT01911468	Slovenia	PCOS	High-income	Grant 20120047, University Medical Center Ljubljana	40	Randomized controlled trial	Single centre (University Medical Center Ljubljana)	Open-label (no blinding)	Excel RAND function	Not described	Not reported as ITT	Not described	Weight loss: COMBI –6.5±2.8 kg; LIRA –3.8±3.7; MET –1.2±1.4; BMI ↓2.4 vs 1.3 vs 0.5; waist ↓5.5 vs 3.2 vs 1.6; IGT normalized in 5/12; metabolic syndrome resolved in 3/7 LIRA	26	70.3	Some concerns
543	2019	IRCT2017090533941N23	Iran	PCOS	Upper-middle-income	Vice-Chancellor for Research, Shahid Beheshti University of Medical Sciences, Iran	58	Randomized controlled trial	Single centre (Taleghani Hospital, Tehran)	Double-blind (participants and researchers blinded)	Computer-generated random numbers	Yes — concealed until end of analysis	Not explicitly stated	No imputation; complete-case analysis of 58/60	Significant ↓ PSQI (β –2.15), ↓ BDI (β –3.62), ↓ BAI (β –1.95); ↓ insulin, ↓ HOMA-IR, ↓ LDL & total cholesterol; ↑ QUICKI; ↑ expression of PPAR-γ and LDLR	31	83.8	Some concerns
544	2021	IRCT2016110111020N6	Iran	GDM	Upper-middle-income	Tehran University of Medical Sciences	507	Parallel, double-blind randomized placebo-controlled trial	Single-centre (Arash Women’s Hospital, Tehran)	Double-blind (participants, clinicians, lab staff)	Stratified randomization by age & BMI; permuted blocks of 6; Excel-generated	Yes – opaque sealed envelopes; independent statistician; identical capsules	No	Per-protocol; excluded dropouts	GDM incidence: 41.9% probiotic vs 40.2% placebo (p=0.780). FBG 88.7 vs 89.6 mg/dL (p=0.338). OGTT-1h 163.9 vs 166.9 (p=0.116); OGTT-2h 138.4 vs 139.3 (p=0.599). No differences in preeclampsia, macrosomia, GA, or birthweight.	33	89.2	Some concerns
545	2019	NCT02947724	Egypt	Endometriosis	Lower-middle-income	Self-funded	200	Randomized controlled surgical trial	University teaching hospital (Kasr El Aini Hospital, Cairo University)	None (open-label surgical trial)	Computer-generated random numbers	Not described	No — per-protocol	Follow-up complete for 186/200; losses excluded; no imputation	Recurrence hazard: Surgicel groups significantly lower vs non-Surgicel (p=0.004). HR vs drainage: DS HR 0.355 (95% CI 0.126–0.995, p=0.049); CS HR 0.271 (95% CI 0.088–0.831, p=0.022). AMH drop: lowest in DS group (median −17.3%) vs D (−33.5%), C (−54.1%), CS (−45.4%) (p<0.001). Pregnancy at 24 mo: no significant difference (p=0.543).	28	75.7	Some concerns
546	2025	ISRCTN11357822	Malaysia	GDM	Upper-middle-income	Department of Obstetrics & Gynaecology, Universiti Malaya	151	Randomized controlled clinical trial	Single tertiary university hospital	Open-label (participants & investigators unblinded)	Computer-generated block randomisation (4 or 8); random.org	Sequentially numbered, sealed opaque envelopes	Yes — ITT complete-case	Noncompliant glucose diaries excluded from specific 24h blocks only	Fewer hyperglycemic episodes on day 2 (median 4 vs 5, p=.002) and day 3 (1 vs 2, p<.001); lower mean glucose over 3 days (6.2 vs 6.6 mmol/L, p<.001); no neonatal differences	30	81.1	Some concerns
547	2024	IRCT20200912048693N3	Iran	PCOS	Upper-middle-income	Not explicitly stated	46	Parallel randomized controlled trial (open-label diet)	Single academic outpatient clinic (Kermanshah University of Medical Sciences)	Participants unblinded; outcome assessors and analysts blinded	Computer-generated block randomization (block size 6)	Yes – sealed opaque envelopes	Yes – explicitly stated	Loss to follow-up reported; ITT analysis used	Weight loss: KD −5.64±1.01 kg vs PMCD −4.35±2.11 kg (p<0.05). BMI: KD −2.73±0.35 vs PMCD −1.71±0.78 (p<0.05). FBG: KD −8.84 (95% CI 7.57–10.10) vs PMCD −5.00 (3.00–6.99) mg/dL (p<0.05). Insulin: KD −13.44 vs PMCD −7.35 µU/mL (p<0.05). HOMA-IR: KD −3.53 vs PMCD −1.96 (p<0.05). LDL-C: PMCD −33.95±7.35 vs KD −23.34±14.14 mg/dL (p<0.05). TG: PMCD −38.20±10.76 vs KD −57.62±21.69 mg/dL (p<0.05). LH: KD…	32	86.5	Some concerns
548	2014	ACTRN12611000639921	Egypt	PCOS	Lower-middle-income	Not reported	220	Double-blind randomized controlled trial	University infertility clinics	Double-blind (placebo tablets matched duration)	Computer-generated randomization tables	Sealed opaque envelopes; placebo tablets used to maintain blinding	No	Complete-case analysis	Ovulation: 10% vs 35.5%; Pregnancy: 3.6% vs 17.2%; Endometrium 5.7 vs 9.3 mm; Mid-luteal progesterone higher in extended group; FSH day 11 significantly higher in extended group	27	73	High risk
549	2020	Not reported	China	PCOS	Upper-middle-income	Not reported	96	Randomized controlled trial (parallel)	Single tertiary hospital gynecology outpatient clinic	Open-label	Computer-generated random table	Not described	Not explicitly stated	Available-case analysis; dropouts excluded	Ovulation rate similar (53.6% vs 64.7%, P>0.05); clinical pregnancy similar (22.9% vs 27.1%); OHSS lower with letrozole (4.2% vs 12.5%, P<0.05); multiple pregnancy lower with letrozole (4.2% vs 8.3%, P<0.05); E2 lower with letrozole	29	78.4	Some concerns
550	2015	AEARCTR-0000573	Egypt	Endometriosis	Lower-middle-income	Not reported	60	Randomized, placebo-controlled, double-blind RCT	Single center (Mansoura University Hospital)	Double-blind (patients, investigators, outcome assessors)	Computer-generated sequence	Numbered, sealed envelopes	No	Per-protocol only (60/76)	VAS ↓ from 7.7→5.4 (p<0.001); VRSmonthly ↓ from 90→~35–39 (p<0.001); placebo unchanged; satisfaction 73% vs 7%	31	83.8	Some concerns
551	2019	IRCT2017082733941N10	Iran	PCOS	Upper-middle-income	No external funding reported	53	Randomized controlled clinical trial	Gynecology clinic (Kosar Clinic, Arak)	Open-label for participants; outcome assessors not described as blinded	Computer-generated randomization; matched by BMI, age, phenotype	Sealed, sequentially numbered opaque envelopes	No ITT; completers only	7 dropouts excluded; no imputation	Myo-inositol ↓FPG (β −5.12 mg/dL, p=.001), ↓insulin (β −1.49, p<.001), ↓HOMA-IR (β −0.36, p<.001), ↑QUICKI (β 0.006, p=.006); ↓triglycerides (β −12.4 mg/dL, p=.003); ↑PPAR-γ expression (p=.002). No effect on LDL-C, HDL-C, GLUT-1, LDLR	28	75.7	Some concerns
552	2013	Malaysian National Medical Research Register (NMRR-5183)	Malaysia	GDM	Upper-middle-income	International Medical University, Kuala Lumpur; Gardenia Bakeries KL (voucher donation)	77	Parallel, randomized controlled trial	Single-centre (tertiary hospital endocrine clinic, Kuala Lumpur)	Open-label (participants and nutritionists unblinded; statisticians blinded)	Computerized randomization (1:1) generated externally	Yes – independent allocation by external biostatistician	Yes – ITT used for anthropometric and glycaemic data	Last observation carried forward (LOCF) for missing data	↓ Weight −1.3 vs −0.1 kg (p=0.018); ↓ BMI −0.6 vs 0 (p=0.03); ↓ WC −3.7 vs −1.3 cm (p=0.046); ↓ 2HPP −0.2 vs +0.8 mmol/L (p=0.025); 33% vs 8% ≥5% weight loss (p=0.01); significant ↓ dietary GI (57 vs 64, p<0.001) and ↑ fiber (17 vs 13 g, p<0.001)	26	70.3	Low risk
553	2019	ChiCTR1900022115	China	GDM	Upper-middle-income	Not reported	226	Randomized controlled trial (parallel-group)	Single-centre (Second Hospital of Jilin University)	Double-blind (participants, investigators, care providers)	Computer random number table	Sequence concealed until assignment	No ITT stated	Not described	Significant reductions in FBG, 1hBG, 2hBG at 24–28 weeks; lower MDA; higher SOD, GSH-PX, T-AOC; fewer macrosomia, NICU admissions	27	73	High risk
554	2009	Not reported	South Africa	PCOS	Upper-middle-income	Not reported	107	Prospective randomized controlled trial	Academic hospitals and fertility institute	Open-label	Computer-generated randomization	Yes – allocation by blinded nurse using randomization list	Yes – ITT for primary outcome	Losses to follow-up treated as non-ovulatory in ITT	Ovulation (ITT): 34/52 (65.4%) vs 36/55 (65.5%); difference 0%, 95% CI −18.1% to 18%. Per-protocol ovulation: 81% vs 75%; difference 6%, 95% CI −11% to 22%. By dose (150 mg): 100% vs 64% (NS). Determinants of ovulation (adjusted OR): SHBG OR 1.04 (95% CI 1.00–1.07, p=0.049); BMI OR 0.90 (0.82–0.98, p=0.018); 17-OH-progesterone OR 0.82 (0.67–0.99, p=0.043). All women with BMI <27 ovulated regardle…	29	78.4	Some concerns
555	2010	Not reported	Brazil	GDM	Upper-middle-income	None stated	81	Randomized controlled trial	Multicentre (3 hospitals in Joinville, Brazil)	Open-label	Computer-generated schedule	Sequentially numbered sealed brown envelopes	No explicit ITT	Complete-case analysis; no imputation	Maternal weight gain lower with metformin (7.6 vs 10.3 kg, p=0.02); no differences in glycemic control, LGA, macrosomia, neonatal hypoglycemia; capillary glucose at 3h lower in glyburide group (p=0.01)	30	81.1	High risk
556	2017	ISRCTN70595832	Multicountry (11 centers across 9 European countries)	GDM	High-income	EU FP7 Programme (Grant 242187); National/Institutional co-funding (Denmark, Netherlands, Poland, Spain, UK)	436	Multicentre randomized controlled trial (factorial design)	Antenatal clinics in 11 centers across 9 European countries	Single-blind (assessors/statisticians blinded; participants unblinded)	Computerized random number generator, stratified by site	Yes – sealed opaque envelopes distributed per site	Yes – ITT analysis performed	Missing data imputed using multiple imputation (20 datasets); complete-case sensitivity analysis confirmed findings	HE+PA ↓ GWG −2.02 kg (95% CI −3.58 to −0.46, p=0.01) vs control; no change in fasting glucose (Δ −0.03 mmol/L, p=0.67) or HOMA-IR; no diff. in GDM (32% vs 37%); birthweight ~100 g lower, ns	34	91.9	Some concerns
557	2018	ACTRN12615000974505 (Australia New Zealand Clinical Trials Registry)	Australia	GDM	High-income	Western Sydney University	22	Pilot randomised controlled trial (feasibility and acceptability study)	Hospital-based antenatal booking clinic (Campbelltown Hospital)	Participants, midwives, obstetricians, diabetes clinic staff, research staff blinded	Electronic randomiser (SPSS v22), stratified by glycaemic risk (low/high)	Blinded letters and decoys; numeric results concealed from staff	Not described	Outcomes missing for 4% of women/babies; reasons: early discharge, premature birth, stillbirth	Treated group: higher NICU admission (36% vs 0%, p=0.043); No Treatment group: higher LGA (33% vs 0%, p=0.03); 89% untreated women had GDM at 24–28 weeks	24	64.9	Some concerns
558	2023	ACTRN12616000924459	Australia, Austria, Sweden, India	GDM	High-income	National Health & Medical Research Council (Australia) + partner institutions	802	Parallel-group 1:1 RCT	17 hospitals (multinational)	Participants and clinicians blinded to OGTT category via decoys; laboratories and adjudicators blinded	Central computerized minimization system	Yes – central allocation with “decoy” assignments to maintain partial blinding	Yes – pre-specified ITT	Multiple imputation (MICE, 10 datasets)	Primary neonatal composite: 24.9% immediate vs 30.5% deferred (RR 0.82, 95% CI 0.68–0.98); no differences in gestational hypertension, neonatal lean mass, or C-section	36	97.3	Some concerns
559	2024	NCT03803072	Norway	GDM	High-income	Norwegian University of Science and Technology (NTNU), Novo Nordisk Foundation (NNF19SA058975), EFSD Future Leaders Award	32	Parallel randomized controlled trial	Single-centre (NTNU and St. Olav’s Hospital, Trondheim)	Open-label (participants unblinded; analysts blinded)	Computer-generated randomization via WebCRF, stratified by BMI (<27 vs ≥27)	Yes – concealed WebCRF allocation	Yes – intention-to-treat	Missing CGM or physical data imputed using Glyculator 3.0; bootstrapping for non-normal data	TRE reduced eating window (12.0→9.9 h, p<0.001); adherence 67%; no significant effect on fasting glucose (−0.1 mmol/L, p=0.19), HbA1c (Δ−0.3 mmol/mol, p=0.81), or HOMA-IR (Δ−0.1, p=0.74); ↑ evening hunger (p<0.01)	31	83.8	Some concerns
560	2020	None (not registered)	UK	PCOS	High-income	Wellcome Trust; MRC grants	10	Randomized crossover mechanistic RCT	Single-centre Clinical Research Facility	Not blinded for NK3Ra vs no-treatment; infusion (kisspeptin vs vehicle) was blinded	Sealed envelopes (simple randomization to kisspeptin vs vehicle per cycle)	Yes—sealed envelopes; allocation concealed until visit	No (per-protocol only)	No imputation; complete-case analysis	NK3Ra ↓ LH (6.5→4.0 IU/L, p<0.05); ↓ FSH; ↓ LH pulse frequency (0.8→0.5 pulses/h); Kisspeptin ↑ LH (5.2→7.8 IU/L); After NK3Ra kisspeptin still ↑ LH (3.5→9.0 IU/L); Estradiol–LH correlation present without NK3Ra (r²=0.59) but abolished with NK3Ra (r²=0.07)	22	59.5	Some concerns
561	2023	NCT03782740	Sweden	Endometriosis	High-income	Stockholm County Council ALF project 20180306; AFA Insurance 170157; Karolinska Institutet endometriosis research fund	40	Randomized, double-blind, placebo-controlled parallel RCT	University hospital (Research Center for Women’s Health, Södersjukhuset)	Double-blinded for participants & investigators	Block randomization in blocks of 4; numbered drug containers provided by manufacturer	Yes—numbered containers; code opened only after completion	Yes—analysis presented as ITT	Low missingness; mixed models handle repeated data; no imputation	No significant difference in primary outcome: adjusted mean pain 2.9 vs 3.3 (p=0.45). No significant differences in dysuria, dyschezia, dyspareunia, analgesic use, insomnia, QoL, PCS.	32	86.5	Some concerns
562	2019	IRCT20180503039511N1	Iran	PCOS	Upper-middle-income	Vice-Chancellor for Research, Isfahan University of Medical Sciences (Grant 296092)	60	Randomised, double-blind, placebo-controlled trial	Single-centre infertility referral clinic	Double-blind (participants, investigators, and assessors)	Block randomisation with permuted block size 4	Sequentially numbered, sealed envelopes; concealed until analysis	Not stated	Complete-case analysis; dropouts due to personal reasons	Within-group: ↓ insulin (p=0.020), ↑ QUICKI (p=0.003), marginal ↓ HOMA-IR (p=0.067). No between-group differences in glycemic or lipid outcomes; hs-CRP unchanged	30	81.1	Low risk
563	2022	ISRCTN13199265 (retrospectively registered)	Bosnia and Herzegovina	PCOS	Upper-middle-income	No specific funding; institutional support	66	Randomized controlled trial	Single centre endocrine outpatient clinic	Open-label (no blinding possible)	Random permuted blocks of size 3; stratified by BMI	Pharmacist-controlled allocation; envelopes	Not explicitly ITT; per-protocol used	Dropouts analyzed per-protocol; no imputation	No treatment × time interaction for most variables. MET vs MI showed: ↓ 120-min OGTT glucose in MET arm (p=0.032). Time effects: significant ↓ in BMI, WC, fat mass; ↑ adiponectin (p=0.020). Testosterone changes: MET lower than MI (p=0.002). No major differences in insulin resistance indices.	28	75.7	Some concerns
564	2017	NCT01556204	USA	Endometriosis	High-income	Not reported (academic institutional support)	73	Multicenter randomized controlled trial	Three US academic teaching hospitals	Participant-blinded until day of surgery; surgeons unblinded	Computer-generated random number table; preoperative assignment	Patients blinded until day of surgery; otherwise unclear	Yes – all randomized patients analyzed	Missing QoL surveys handled with available-case analysis; no imputation	Operative time: 106.6±48.4 vs 101.6±63.2 min (NS). No differences in blood loss, complications, or conversions. QoL improved significantly in both groups at 6 wks & 6 mos (EHP-30). SF-12 unchanged.	33	89.2	Some concerns
565	2011	not reported	USA	PCOS	High-income	Schering-Plough Corporation (now Merck & Co.)	98	Prospective randomized controlled trial	single centre	Open-label (not blinded)	Online randomization software	Sealed envelopes	yes	not reported	Group 2 CPR 33% vs group 1 19%; LBR 35% vs 20%; premature luteinization lower in groups 2 & 3 (1.8–2.1%) vs group 1 (21%); total gonadotropin dose & stimulation days similar	26	70.3	Some concerns
566	2015	ACTRN12613000623796	Greece	PCOS	High-income	Medical School & First Dept. of Pediatrics, National & Kapodistrian University of Athens	46	Two-arm parallel RCT	Academic endocrine clinic (Evgenideion Hospital, Athens University Medical School)	Single-blind (outcome assessor blinded; participants not blinded)	Randomization via Random.org; sequence implemented by independent assistant	No concealment used	Yes — intention-to-treat with multiple imputation	Multiple imputation for missing values; comparison of imputed vs observed (MCAR testing)	Between-group post-intervention: ↓Depression (p=.011), ↓Stress (p=.025), ↓Cort1 (p=.001), ↓Cort2 (p=.025). Within intervention group: ↓DASS21 depression (p=.002), ↓anxiety (p=.001), ↓stress (p<.001), ↑PCOSQ domains (emotions, body hair, weight, infertility, menstrual problems all p<.01), ↓AUCg (p=.037) (Tables 1 & 3, pages 7–10)	29	78.4	Some concerns
567	2009	NCT00484705	Sweden	PCOS	High-income	Swedish Medical Research Council; Novo Nordisk Foundation; multiple Swedish foundations; government medical education funding	84	Randomized controlled clinical trial	University research hospital	Blinded outcome assessment for MSNA; participants unblinded	Computer-generated block randomization stratified by BMI and age (2:2:1 allocation)	Independent observers; unclear if allocation sequence concealed	No — only women completing MSNA measurements analyzed	No imputation; per-protocol	MSNA burst frequency ↓: EA (p=0.036), Exercise (p=0.030) vs control. Sagittal diameter ↓ with EA (p=0.001). BMI ↓ with Exercise (p=0.004). Free testosterone ↓ within EA group (p<0.05). No endocrine or metabolic changes between groups.	24	64.9	Some concerns
568	2008	NCT00001848	USA	Endometriosis	High-income	Intramural NIH funding (NICHD & NIH Clinical Center)	93	Randomized, placebo-controlled, double-blind parallel RCT	Two centers (NIH Clinical Center + Georgetown Univ.)	Double-blind (participants + investigators)	Random numbers table; alternating blocks of 8 and 10; sequence held only by pharmacy	Yes – pharmacy concealed allocation; identical capsules	Yes – explicitly analyzed using ITT	Non-completers categorized by last known pain status; no imputation described	Raloxifene significantly shortened time to pain recurrence (P=0.03); earlier second surgery (P=0.016); logistic regression OR for pain recurrence 2.81 (95% CI 1.41–6.19, P=0.006); no difference in recurrence of lesions; QoL similar except mental health subscale worse on raloxifene	34	91.9	Some concerns
569	2016	ClinicalTrials.gov NCT01809431	United States	GDM	High-income	NIH/NIDDK (R21DK092750-01A1); The Boppy Company (donated breastfeeding pillows)	100	Cluster randomised controlled trial	Multicentre (2 sites: Rex Hospital & WakeMed, North Carolina)	Single-blind (data collectors blinded; participants unblinded)	Site-stratified computer-generated randomization (monthly group clusters)	Yes – allocation by project manager using site-stratified sequence	Yes – ITT approach	Time-to-event models included all with ≥1 follow-up; no imputation	Any breastfeeding HR 0.40 (95% CI 0.21–0.74, p<0.01); exclusive breastfeeding HR 0.50 (95% CI 0.34–0.72, p=0.06); high-intensity breastfeeding 62% vs 36% (p=0.02); no adverse events	32	86.5	High risk
570	2024	SLCTR/2015/021	Sri Lanka	GDM	Lower-middle-income	University of Sri Jayewardenepura (ASP/06/RE/MED/2013/39)	100	Cluster randomized controlled trial	Community postpartum clinics (12 clusters)	Not blinded (objective outcomes measured in external lab)	Simple randomization of clusters via random number table	Not concealed	Yes	Missing data replaced using sample median; CONSORT diagram provided	At 12 months: FPG 87.3 vs 123.2 (p<0.01); 2h-OGTT 106.5 vs 156.1 (p=0.01); HbA1c 5.3 vs 6.8 (p<0.01); HOMA-IR 0.9 vs 2.3 (p<0.01). Control group 33× more likely to have insulin resistance (AOR 32.9)	28	75.7	Some concerns
571	2019	NCT03838380	South Korea	GDM	High-income	Korea Centers for Disease Control and Prevention (fund code 2016E3300900)	21	Randomized controlled trial (pilot)	Single centre (Kangbuk Samsung Hospital, Seoul)	Unblinded (nature of intervention), but Doppler assessors blinded	Computer-generated random sequence	Not explicitly described	Yes – stated ITT	Very small missing data; 2 dropouts excluded in analysis tables	Postpartum BMI ↓ (p=0.021); weight ↓ (p=0.037); body fat ↓ (p=0.005); HOMA-IR ↓ (p=0.011); no significant differences in delivery mode, birth weight, LGA/SGA, glycemic control	25	67.6	High risk
572	2010	NCT00621179	USA	Endometriosis	High-income	TAP Pharmaceuticals (grant support)	37	Prospective randomized controlled pilot trial	Private ART center	Not blinded (open-label)	Two computer-generated randomization tables (stratified by integrin-positive vs integrin-negative)	Allocation concealed using separate sealed tables for each stratum	No ITT	Dropouts excluded; no imputation; one cycle cancelled due to poor response	No significant differences between prolonged GnRHa vs control in biochemical pregnancy, ongoing pregnancy, or implantation rate. Trend toward improved outcomes in integrin-positive pretreatment group (ongoing pregnancy 62.5% vs 41.6%; OR 2.33; CI 0.37–14.6). Integrin-negative prediction accuracy low (44.4%).	26	70.3	Low risk
573	2019	NCT01620528 (EM-I); NCT01760954 (extension EM-III)	USA & Canada (151 trial sites)	Endometriosis	High-income	AbbVie; AbbVie involved in design, data collection, analysis, interpretation, writing, reviewing	860	Randomized, double-blind, multicenter, placebo-controlled Phase III trial	Centre Type Multicenter (151 sites)	Double-blind	Not explicitly described	Not explicitly described	yes - modified intention-to-treat population” (all randomized receiving ≥1 dose)	not mentioned	Baseline T-score ~62–64 - Change at 6 months: • Placebo: 4.53 • Elagolix 150 mg QD: 6.73 (difference vs placebo 2.21; P=.008) • Elagolix 200 mg BID: 10.42 (difference vs placebo 5.90; P<.001) - Strong correlation between symptom response and fatigue improvement	35	94.6	High risk
574	2025	ClinicalTrials.gov NCT06761625	Poland	PCOS	High-income	No external funding; probiotic and placebo supplied by SanProbi®	50	Randomized double-blind placebo-controlled trial	University gynecology/endocrinology clinics	Double-blind (participants and investigators)	Random allocation (1:1)	Identical placebo capsules	No – per-protocol	Dropouts excluded; complete-case analysis	Within probiotic group: LH 9.11→5.32 mIU/mL (p=0.0218); TSH 1.82→1.32 µIU/mL (p=0.0442); androstenedione 3.53→3.20 ng/mL (p=0.0038); SHBG 37.8→48.9 nmol/L (p=0.0012); BMI 28.38→27.36 kg/m² (p=0.0198). Between-group delta comparisons: TSH −0.35 vs +0.20 µIU/mL (p=0.0269); androstenedione −0.345 vs −0.095 ng/mL (p=0.0262); SHBG +6.2 vs +3.85 nmol/L (p=0.0114); LH −2.75 vs −0.65 mIU/mL (one-tailed p…	31	83.8	Some concerns
575	2021	IRCT201610193140N18	Iran	PCOS	Upper-middle-income	Nutrition Research Center, Student Research Committee (Tabriz University of Medical Sciences)	43	Double-blind, placebo-controlled RCT	Single tertiary hospital (Alzahra Hospital)	Double-blind (participants & investigators)	Computer-generated randomization	Identical-appearing placebo tablets	Yes—ITT stated and applied	LOCF used for missing values	Significant ↓ IL-6 (p=0.007), TNF-α (p=0.009), hsCRP (p=0.01), VCAM-1 (p=0.002), E-selectin (p=0.006). ICAM-1 NS (p=0.06).	31	83.8	Some concerns
576	2024	IRCT20141025019669N20 (retrospective)	Iran	PCOS	Upper-middle-income	Vice-Chancellor for Research Affairs, Qazvin University of Medical Sciences	90	Randomized, double-blind, placebo-controlled clinical trial	Single-center (Qazvin University of Medical Sciences)	Double-blind (participants, investigators, physician)	Simple random numbers; 1:1 allocation	Capsules identical; prepared externally; opaque identical packaging	No (per-protocol only)	3 dropouts excluded; no imputation described	Significant ↓ in FBS (p=0.041), insulin (p=0.026), HOMA-IR (p=0.022), MDA (p=0	27	73	High risk
577	2018	NR	Saudi Arabia	PCOS	High-income	No funding—authors self-funded study	233	Randomized controlled trial	Single centre (Saudi German Hospital, Madinah)	None (open-label)	Computer-generated simple randomisation via OpenEpi	NR	No	NR	Means, SD, percentages, p-values; full tables (Tables 1–7)	26	70.3	Some concerns
[truncated: 118 more rows]

## Sheet: Variable Definitions
Blinding: Masking of participants and/or investigators
[truncated: 5 more rows]
