# Supplementary material
Source: Research Square preprint supplement (doi:10.21203/rs.3.rs-9212126/v1)
Supplement: Supplementary file 1 [file f68c943d530e56d9c244ba79.docx]

**Supplementary File 1 – Detailed Search Strategy**

**1. PubMed Search Strategy**

**Database:** PubMed
**Search date:** 1 October 2025

**Search strategy (stepwise):**

| **Step** | **Concept** | **Search terms** | **Field / Filter** |
| --- | --- | --- | --- |
| 1 | Condition: Endometriosis | "Endometriosis"[Mesh] OR endometriosis[tiab] | MeSH / Title/Abstract |
| 2 | Condition: Polycystic Ovary Syndrome | "Polycystic Ovary Syndrome"[Mesh] OR PCOS[tiab] | MeSH / Title/Abstract |
| 3 | Condition: Gestational Diabetes | "Gestational Diabetes"[Mesh] OR GDM[tiab] | MeSH / Title/Abstract |
| 4 | Condition: Premenstrual Dysphoric Disorder | "Premenstrual Dysphoric Disorder"[Mesh] OR PMDD[tiab] | MeSH / Title/Abstract |
| 5 | Combine conditions | Step 1 OR Step 2 OR Step 3 OR Step 4 | Boolean OR |
| 6 | Study design: RCT | "Randomized Controlled Trial"[Publication Type] OR randomized[tiab] OR randomised[tiab] OR RCT[tiab] | Publication Type / Title/Abstract |
| 7 | Combine conditions + study design | Step 5 AND Step 6 | Boolean AND |
| 8 | Date filter | 2005/01/01 – 2025/10/01 | Publication Date |
| 9 | Language filter | English[lang] | Language |

**Final combined PubMed search string:**

(("Endometriosis"[Mesh] OR endometriosis[tiab])
OR ("Polycystic Ovary Syndrome"[Mesh] OR PCOS[tiab])
OR ("Gestational Diabetes"[Mesh] OR GDM[tiab])
OR ("Premenstrual Dysphoric Disorder"[Mesh] OR PMDD[tiab]))
AND
("Randomized Controlled Trial"[Publication Type] OR randomized[tiab] OR randomised[tiab] OR RCT[tiab])
AND
("2005/01/01"[Date - Publication] : "2025/10/01"[Date - Publication])
AND
(English[lang])

**2. ScienceDirect Search Strategy**

**Database:** ScienceDirect
**Search date:** 1 October 2025

**Search strategy:**

("endometriosis" OR "polycystic ovary syndrome" OR "PCOS" OR "gestational diabetes" OR "GDM" OR "premenstrual dysphoric disorder" OR "PMDD")
AND
("randomized controlled trial" OR "randomised controlled trial" OR "RCT")

**Filters applied:**

- Article type: Research articles
- Language: English
- Publication years: 2005–2025

**3. Google Scholar Search Strategy**

**Database:** Google Scholar
**Search date:** 1 October 2025

**Search strategy:**

("endometriosis" OR "PCOS" OR "gestational diabetes" OR "GDM" OR "PMDD" OR "premenstrual dysphoric disorder")
AND
("randomized controlled trial" OR "RCT")

**Screening approach:**

- Results sorted by relevance
- First 500 results screened
- Titles and abstracts assessed for eligibility
- Screening limited due to the reproducibility constraints of Google Scholar

**4. Additional Search Methods**

- Reference lists of included studies were manually screened
- No restrictions were placed on the country of origin

**5. Search Strategy Development**

- Search strategy was based on four predefined conditions:
  - Endometriosis
  - Polycystic ovary syndrome (PCOS)
  - Gestational diabetes mellitus (GDM)
  - Premenstrual dysphoric disorder (PMDD)
- Both MeSH terms and free-text keywords were used (PubMed)
- Boolean operators (AND, OR) were applied to optimise sensitivity
- Strategy was designed to maximise retrieval of randomized controlled trials
