# Supplementary material
Source: Research Square preprint supplement (doi:10.21203/rs.3.rs-9212126/v1)
Supplement: Supplementary file 2 [file 4ec9d9ca5d6d2a03a9900f6e.xlsx]

## Sheet: ROB 2
Study ID	Randomisation process	Deviations from intended interventions	Missing outcome data	Measurement of outcomes	Selection of reported result	Overall RoB
1	Some concerns	High risk	Low risk	Some concerns	Some concerns	High risk
2	Low risk	Some concerns	Low risk	Low risk	Some concerns	Some concerns
3	Low risk	Some concerns	Some concerns	Low risk	Some concerns	Some concerns
4	Some concerns	High risk	Some concerns	Low risk	Some concerns	High risk
5	Low risk	Some concerns	Low risk	Low risk	Low risk	Some concerns
6	Low risk	Some concerns	Low risk	Some concerns	Low risk	Some concerns
7	Some concerns	Some concerns	Some concerns	Some concerns	Some concerns	Some concerns
8	Low risk	Low risk	Low risk	Some concerns	Some concerns	Some concerns
9	Some concerns	Some concerns	Some concerns	Low risk	Some concerns	Some concerns
10	Low risk	High risk	Some concerns	Low risk	Some concerns	High risk
11	Low risk	Some concerns	Some concerns	Low risk	Some concerns	Some concerns
12	Low risk	Some concerns	Low risk	Low risk	Some concerns	Some concerns
13	Low risk	Some concerns	Low risk	Low risk	Some concerns	Some concerns
14	Some concerns	Some concerns	Low risk	Low risk	Some concerns	Some concerns
15	Some concerns	High risk	Some concerns	Some concerns	Some concerns	High risk
16	Some concerns	Low risk	Some concerns	Low risk	Some concerns	Some concerns
17	Low risk	High risk	High risk	Some concerns	Some concerns	High risk
18	High risk	Some concerns	Some concerns	Low risk	Some concerns	High risk
19	Low risk	Low risk	Some concerns	Low risk	Some concerns	Some concerns
20	Low risk	Low risk	Some concerns	Low risk	Low risk	Some concerns
21	Low risk	Some concerns	Low risk	Low risk	Low risk	Some concerns
22	Low risk	Low risk	Some concerns	Low risk	Some concerns	Some concerns
23	Some concerns	High risk	Low risk	Some concerns	Some concerns	High risk
24	Low risk	Some concerns	Some concerns	Low risk	Some concerns	Some concerns
25	Low risk	Some concerns	Some concerns	Low risk	Some concerns	Some concerns
26	High risk	Some concerns	Low risk	Some concerns	Some concerns	High risk
27	Low risk	Low risk	Some concerns	Some concerns	Some concerns	Some concerns
28	Low risk	High risk	Some concerns	Some concerns	Some concerns	High risk
29	Some concerns	High risk	Low risk	Low risk	Some concerns	High risk
30	Some concerns	Some concerns	Low risk	Some concerns	Some concerns	Some concerns
31	Some concerns	Some concerns	High risk	Some concerns	Some concerns	High risk
32	Low risk	Some concerns	Low risk	Low risk	Some concerns	Some concerns
33	Low risk	Low risk	Low risk	Low risk	Some concerns	Some concerns
34	Low risk	Low risk	Some concerns	Low risk	Low risk	Low risk
35	Low risk	Low risk	Some concerns	Some concerns	Some concerns	Some concerns
36	Low risk	Some concerns	High risk	Some concerns	Some concerns	High risk
37	Low risk	Some concerns	Some concerns	Low risk	Low risk	Some concerns
38	Some concerns	High risk	Low risk	Some concerns	Some concerns	High risk
39	Some concerns	High risk	Low risk	Some concerns	Some concerns	High risk
40	Low risk	Some concerns	Low risk	Low risk	Some concerns	Some concerns
41	Low risk	Some concerns	Low risk	Some concerns	Some concerns	Some concerns
42	Low risk	Low risk	Some concerns	Low risk	Some concerns	Some concerns
43	High risk	Low risk	Some concerns	Low risk	Some concerns	High risk
44	Low risk	High risk	Some concerns	Some concerns	Some concerns	High risk
45	Some concerns	Some concerns	Some concerns	Low risk	Some concerns	Some concerns
46	Low risk	Some concerns	Some concerns	Some concerns	Some concerns	Some concerns
47	Some concerns	Some concerns	Some concerns	Low risk	Some concerns	Some concerns
48	Some concerns	Low risk	Some concerns	Low risk	Some concerns	Some concerns
49	Some concerns	Low risk	Some concerns	Low risk	Some concerns	Some concerns
50	Low risk	Some concerns	Low risk	Low risk	Low risk	Some concerns
51	Some concerns	High risk	Some concerns	Low risk	Some concerns	High risk
52	Some concerns	High risk	Some concerns	Low risk	Some concerns	High risk
53	Some concerns	Some concerns	Some concerns	Some concerns	Some concerns	High risk
54	Some concerns	Some concerns	Some concerns	Some concerns	Some concerns	Some concerns
55	Low risk	Low risk	Low risk	Some concerns	Some concerns	Some concerns
56	Some concerns	Low risk	Some concerns	Low risk	Some concerns	Some concerns
57	Some concerns	Some concerns	Low risk	Some concerns	Some concerns	High risk
58	Low risk	Some concerns	Low risk	Some concerns	Low risk	Some concerns
59	Low risk	Low risk	Some concerns	Low risk	Some concerns	Some concerns
60	Some concerns	Some concerns	Low risk	Low risk	Some concerns	Some concerns
61	Low risk	Some concerns	High risk	Low risk	Some concerns	High risk
62	Some concerns	High risk	Some concerns	Low risk	Some concerns	High risk
63	Low risk	Some concerns	Low risk	Low risk	Low risk	Some concerns
64	Low risk	Some concerns	Some concerns	Low risk	Some concerns	Some concerns
65	Low risk	Some concerns	Low risk	Low risk	Some concerns	Some concerns
66	Low risk	Some concerns	Some concerns	Some concerns	Some concerns	Some concerns
67	Some concerns	Some concerns	High risk	Low risk	Some concerns	High risk
68	Low risk	Low risk	High risk	Low risk	Some concerns	High risk
69	Low risk	Some concerns	Some concerns	Low risk	Some concerns	Some concerns
70	Some concerns	Some concerns	Some concerns	Low risk	Some concerns	Some concerns
71	Some concerns	High risk	Low risk	Low risk	Some concerns	High risk
72	Some concerns	High risk	Some concerns	Low risk	Some concerns	High risk
73	Some concerns	High risk	High risk	High risk	Some concerns	High risk
74	Low risk	Some concerns	Some concerns	Some concerns	Some concerns	Some concerns
75	Some concerns	High risk	Some concerns	Low risk	Some concerns	High risk
76	Some concerns	Some concerns	Some concerns	Low risk	Some concerns	Some concerns
77	Low risk	Low risk	Low risk	Some concerns	Low risk	Some concerns
78	Some concerns	High risk	Low risk	Low risk	Some concerns	High risk
79	Some concerns	Some concerns	Some concerns	Low risk	Some concerns	Some concerns
80	Low risk	Low risk	Some concerns	Low risk	High risk	Some concerns
81	Low risk	Some concerns	Low risk	Low risk	Low risk	Some concerns
82	Some concerns	Some concerns	High risk	Low risk	Some concerns	High risk
83	Low risk	Some concerns	Some concerns	Low risk	Some concerns	Some concerns
84	Low risk	Low risk	Low risk	Low risk	Low risk	Low risk
85	Low risk	Low risk	Low risk	Low risk	Some concerns	Low risk
86	Low risk	Some concerns	High risk	Some concerns	Some concerns	High risk
87	Low risk	Some concerns	Low risk	Low risk	Low risk	Some concerns
88	Low risk	High risk	High risk	Low risk	Some concerns	High risk
89	Low risk	Some concerns	Low risk	Low risk	Low risk	Some concerns
90	Low risk	Some concerns	High risk	Low risk	Low risk	High risk
91	Some concerns	Some concerns	Some concerns	Some concerns	Some concerns	Some concerns
92	Low risk	High risk	Some concerns	Some concerns	Some concerns	High risk
93	Some concerns	Low risk	Some concerns	Low risk	Some concerns	Some concerns
94	Low risk	Some concerns	Some concerns	Some concerns	Some concerns	Some concerns
95	Low risk	Low risk	Some concerns	Low risk	Some concerns	Some concerns
96	Some concerns	High risk	Some concerns	Some concerns	Some concerns	High risk
97	Low risk	High risk	Some concerns	Low risk	Some concerns	Some concerns
98	Low risk	Low risk	Some concerns	Low risk	Low risk	Some concerns
99	Some concerns	High risk	Some concerns	Some concerns	Some concerns	High risk
100	Some concerns	Some concerns	Low risk	Low risk	Some concerns	Some concerns
101	Low risk	Low risk	Low risk	Low risk	Some concerns	Some concerns
102	Low risk	Some concerns	Some concerns	Low risk	Low risk	Some concerns
103	Low risk	Low risk	Some concerns	Low risk	Low risk	Some concerns
104	Some concerns	High risk	Low risk	Low risk	Some concerns	High risk
105	Some concerns	High risk	Some concerns	Some concerns	Some concerns	High risk
106	Some concerns	Some concerns	High risk	Some concerns	Some concerns	High risk
107	Low risk	Some concerns	Low risk	Low risk	Low risk	Some concerns
108	Some concerns	Some concerns	High risk	Low risk	Some concerns	High risk
109	Some concerns	High risk	Some concerns	Some concerns	Some concerns	High risk
110	Some concerns	Some concerns	Low risk	Some concerns	Some concerns	Some concerns
111	Some concerns	Some concerns	Some concerns	Low risk	Some concerns	Some concerns
112	Low risk	Low risk	Some concerns	Low risk	Some concerns	Some concerns
113	Low risk	Low risk	Low risk	Low risk	Low risk	Low risk
114	Some concerns	High risk	High risk	Some concerns	Some concerns	High risk
115	Low risk	Some concerns	High risk	Some concerns	Low risk	High risk
116	Low risk	Some concerns	High risk	Some concerns	Low risk	High risk
117	Low risk	High risk	Low risk	Some concerns	Some concerns	High risk
118	Some concerns	High risk	Low risk	Low risk	Some concerns	High risk
119	Low risk	Low risk	High risk	Low risk	Some concerns	High risk
120	Some concerns	Some concerns	Some concerns	Some concerns	Some concerns	Some concerns
121	Some concerns	High risk	High risk	Some concerns	Some concerns	High risk
122	Low risk	Low risk	Some concerns	Some concerns	Low risk	Some concerns
123	Some concerns	Some concerns	Some concerns	Some concerns	Some concerns	Some concerns
124	Low risk	High risk	Low risk	Some concerns	Low risk	High risk
125	Low risk	Some concerns	Low risk	Some concerns	Low risk	Some concerns
126	Some concerns	High risk	High risk	Low risk	Some concerns	High risk
127	Low risk	Low risk	Some concerns	Low risk	Some concerns	Some concerns
128	Low risk	Some concerns	Low risk	Low risk	Low risk	Some concerns
129	Some concerns	Some concerns	Some concerns	Some concerns	Some concerns	Some concerns
130	Low risk	Low risk	Low risk	Low risk	Some concerns	Some concerns
131	Low risk	Some concerns	Low risk	Low risk	Low risk	Some concerns
132	Some concerns	Some concerns	Low risk	Some concerns	Some concerns	Some concerns
133	Low risk	Some concerns	Some concerns	Some concerns	Some concerns	Some concerns
134	Some concerns	High risk	Some concerns	Some concerns	Some concerns	High risk
135	Low risk	Low risk	Low risk	Low risk	Low risk	Low risk
136	Some concerns	Some concerns	High risk	Some concerns	Some concerns	High risk
137	Low risk	Low risk	Low risk	Low risk	Low risk	Low risk
138	Some concerns	Some concerns	Low risk	Low risk	Some concerns	Some concerns
139	Some concerns	Some concerns	Some concerns	Some concerns	Some concerns	Some concerns
140	Low risk	Some concerns	Some concerns	Some concerns	Some concerns	Some concerns
141	Some concerns	High risk	Some concerns	Low risk	Some concerns	High risk
142	Low risk	High risk	Some concerns	Low risk	Some concerns	High risk
143	Low risk	Low risk	Some concerns	Low risk	Some concerns	Some concerns
144	High risk	Some concerns	Some concerns	Some concerns	Some concerns	High risk
145	Some concerns	High risk	Low risk	Some concerns	Some concerns	High risk
146	Low risk	Low risk	Some concerns	Low risk	Some concerns	Some concerns
147	Some concerns	High risk	Low risk	Low risk	Some concerns	High risk
148	Low risk	Some concerns	Low risk	Some concerns	Low risk	Some concerns
149	Some concerns	High risk	High risk	Low risk	Some concerns	High risk
150	Low risk	Low risk	Some concerns	Low risk	Low risk	Some concerns
151	Low risk	High risk	Low risk	Some concerns	Some concerns	High risk
152	Low risk	Low risk	Some concerns	Low risk	Low risk	Some concerns
153	Some concerns	High risk	Low risk	Low risk	Some concerns	High risk
154	Some concerns	Some concerns	High risk	Low risk	Some concerns	High risk
155	Low risk	Low risk	Low risk	Low risk	Low risk	Low risk
156	Low risk	Low risk	Some concerns	Low risk	Low risk	Some concerns
157	Some concerns	High risk	High risk	Some concerns	Some concerns	High risk
158	Low risk	Some concerns	Some concerns	Some concerns	Low risk	Some concerns
159	Some concerns	Some concerns	Some concerns	Low risk	Some concerns	Some concerns
160	Low risk	Low risk	High risk	Low risk	Some concerns	High risk
161	Some concerns	High risk	Low risk	Low risk	Some concerns	High risk
162	Low risk	Low risk	Some concerns	Low risk	Some concerns	Some concerns
163	Some concerns	Some concerns	Some concerns	Low risk	Some concerns	Some concerns
164	Low risk	Some concerns	Low risk	Low risk	Some concerns	Some concerns
165	Low risk	High risk	High risk	Some concerns	Some concerns	High risk
166	Some concerns	High risk	Low risk	Some concerns	Some concerns	High risk
167	Low risk	High risk	Low risk	Some concerns	Some concerns	High risk
168	Some concerns	High risk	Some concerns	Low risk	Some concerns	High risk
169	Low risk	Low risk	Low risk	Low risk	Low risk	Low risk
170	Low risk	Some concerns	Some concerns	Low risk	Some concerns	Some concerns
171	Low risk	Some concerns	High risk	Low risk	Some concerns	High risk
172	Low risk	Low risk	Some concerns	Low risk	Low risk	Some concerns
173	Some concerns	High risk	Some concerns	High risk	Some concerns	High risk
174	Low risk	Low risk	Some concerns	Some concerns	Some concerns	Some concerns
175	Low risk	Low risk	Some concerns	Some concerns	Low risk	Some concerns
176	Low risk	Low risk	Some concerns	Low risk	Some concerns	Some concerns
177	Some concerns	High risk	Some concerns	Low risk	Some concerns	High risk
178	Low risk	High risk	Low risk	Some concerns	Low risk	High risk
179	Low risk	Low risk	Some concerns	Low risk	Some concerns	Some concerns
180	Some concerns	Some concerns	Low risk	Low risk	Some concerns	Some concerns
181	Low risk	Some concerns	Some concerns	Low risk	Some concerns	Some concerns
182	Low risk	Low risk	Some concerns	Low risk	Low risk	Some concerns
183	Low risk	Low risk	Low risk	Low risk	Low risk	Low risk
184	Low risk	High risk	Some concerns	Some concerns	Some concerns	High risk
185	Some concerns	High risk	Some concerns	Some concerns	Some concerns	High risk
186	Some concerns	High risk	Some concerns	Low risk	Some concerns	High risk
187	Low risk	Some concerns	Some concerns	Some concerns	Some concerns	Some concerns
188	Low risk	Low risk	Some concerns	Low risk	Some concerns	Some concerns
189	Low risk	Low risk	Some concerns	Low risk	Low risk	Some concerns
190	Some concerns	High risk	Some concerns	Low risk	Some concerns	High risk
191	Low risk	High risk	Some concerns	Some concerns	Low risk	High risk
192	Some concerns	High risk	Some concerns	Some concerns	Low risk	High risk
193	Some concerns	High risk	Some concerns	Low risk	Some concerns	High risk
194	Some concerns	Some concerns	Some concerns	Low risk	Some concerns	Some concerns
195	Some concerns	High risk	Low risk	Low risk	Some concerns	High risk
196	Low risk	Some concerns	Low risk	Low risk	Low risk	Some concerns
197	Low risk	Low risk	Some concerns	Low risk	Low risk	Some concerns
198	Low risk	Low risk	Low risk	Low risk	Low risk	Low risk
199	Some concerns	High risk	Low risk	Low risk	Some concerns	High risk
200	Low risk	Low risk	Low risk	Low risk	Low risk	Low risk
201	Low risk	Some concerns	Low risk	Low risk	Some concerns	Some concerns
202	Low risk	Low risk	Some concerns	Low risk	Some concerns	Some concerns
203	Low risk	Low risk	Some concerns	Some concerns	Some concerns	Some concerns
204	Low risk	High risk	Some concerns	Low risk	Some concerns	High risk
205	Low risk	Some concerns	Low risk	Some concerns	Low risk	Some concerns
206	Low risk	Low risk	Low risk	Low risk	Low risk	Low risk
207	Low risk	Low risk	Low risk	Low risk	Low risk	Low risk
208	Low risk	Low risk	Low risk	Low risk	Low risk	Low risk
209	Low risk	Low risk	Some concerns	Low risk	Some concerns	Some concerns
210	Low risk	Low risk	Some concerns	Low risk	Some concerns	Some concerns
211	High risk	High risk	Some concerns	Some concerns	Some concerns	High risk
212	Some concerns	Some concerns	Some concerns	Low risk	Some concerns	Some concerns
213	Some concerns	Some concerns	Some concerns	Low risk	Some concerns	Some concerns
214	Low risk	High risk	Some concerns	Some concerns	Some concerns	High risk
215	Some concerns	Low risk	Low risk	Some concerns	Some concerns	Some concerns
216	Some concerns	Some concerns	High risk	Low risk	Some concerns	High risk
217	Some concerns	Some concerns	Low risk	Low risk	Some concerns	Some concerns
218	Low risk	Some concerns	Low risk	Some concerns	Low risk	Some concerns
219	Low risk	Low risk	High risk	Some concerns	Some concerns	High risk
220	Low risk	Some concerns	Low risk	Low risk	Some concerns	Some concerns
221	Some concerns	Some concerns	Some concerns	Some concerns	Some concerns	Some concerns
222	Low risk	Some concerns	High risk	Some concerns	Some concerns	High risk
223	Low risk	Low risk	Low risk	Low risk	Some concerns	Some concerns
224	Some concerns	High risk	High risk	Some concerns	Some concerns	High risk
225	Low risk	Low risk	Some concerns	Low risk	Some concerns	Some concerns
226	Some concerns	Some concerns	High risk	Low risk	Some concerns	High risk
227	Low risk	Low risk	Some concerns	Low risk	Some concerns	Some concerns
228	Some concerns	High risk	Some concerns	Some concerns	Some concerns	High risk
229	Low risk	Low risk	Some concerns	Low risk	Low risk	Some concerns
230	Low risk	Low risk	Some concerns	Low risk	Low risk	Some concerns
231	Some concerns	Some concerns	Low risk	Some concerns	Some concerns	Some concerns
232	Some concerns	High risk	Low risk	Some concerns	Some concerns	High risk
233	Low risk	Some concerns	Low risk	Some concerns	Some concerns	Some concerns
234	Low risk	Low risk	Low risk	Low risk	Low risk	Low risk
235	Low risk	Low risk	Some concerns	Low risk	Some concerns	Some concerns
236	Low risk	Some concerns	Some concerns	Some concerns	Some concerns	Some concerns
237	Low risk	Low risk	Some concerns	Low risk	Low risk	Some concerns
238	Low risk	Low risk	Some concerns	Low risk	Some concerns	Some concerns
239	Low risk	Low risk	Low risk	Low risk	Some concerns	Some concerns
240	Low risk	Low risk	Low risk	Low risk	Low risk	Low risk
241	Low risk	Low risk	Low risk	Low risk	Low risk	Low risk
242	Low risk	Low risk	Some concerns	Some concerns	Some concerns	Some concerns
243	Low risk	Some concerns	Low risk	Some concerns	Low risk	Some concerns
244	Low risk	Low risk	Some concerns	Low risk	Some concerns	Some concerns
245	Low risk	High risk	Low risk	Low risk	Some concerns	High risk
246	Low risk	Some concerns	Low risk	Low risk	Some concerns	Some concerns
247	Some concerns	Some concerns	Some concerns	Some concerns	Some concerns	Some concerns
248	Low risk	Some concerns	Low risk	Some concerns	Some concerns	Some concerns
249	Low risk	Low risk	Some concerns	Low risk	Low risk	Some concerns
250	Low risk	Low risk	Some concerns	Low risk	Some concerns	Some concerns
251	Some concerns	High risk	Low risk	Low risk	Some concerns	High risk
252	Low risk	Some concerns	Some concerns	Low risk	Some concerns	Some concerns
253	Some concerns	Some concerns	Low risk	Low risk	Some concerns	Some concerns
254	Low risk	Some concerns	Low risk	Low risk	Low risk	Some concerns
255	Some concerns	Some concerns	Some concerns	Some concerns	Some concerns	Some concerns
256	Low risk	Some concerns	Low risk	Low risk	Some concerns	Some concerns
257	Some concerns	High risk	Some concerns	Some concerns	Some concerns	High risk
258	Low risk	Some concerns	Low risk	Low risk	Some concerns	Some concerns
259	Some concerns	High risk	Some concerns	Low risk	Some concerns	High risk
260	Low risk	Low risk	Low risk	Low risk	Low risk	Low risk
261	Low risk	Low risk	Some concerns	Low risk	Some concerns	Some concerns
262	Low risk	Low risk	Some concerns	Low risk	Some concerns	Some concerns
263	Some concerns	High risk	Some concerns	Low risk	Some concerns	High risk
264	High risk	High risk	Some concerns	Low risk	Some concerns	High risk
265	Low risk	Low risk	Some concerns	Low risk	Low risk	Some concerns
266	Some concerns	High risk	Some concerns	Low risk	Some concerns	High risk
267	Some concerns	Low risk	Low risk	Low risk	Some concerns	Some concerns
268	Low risk	Some concerns	High risk	Low risk	Low risk	High risk
269	Some concerns	Some concerns	High risk	Some concerns	Some concerns	High risk
270	Low risk	Low risk	Some concerns	Low risk	Some concerns	Some concerns
271	Low risk	Low risk	Some concerns	Low risk	Some concerns	Some concerns
272	Low risk	Low risk	Some concerns	Some concerns	Some concerns	Some concerns
273	Low risk	Some concerns	Low risk	Some concerns	Some concerns	Some concerns
274	Low risk	Low risk	Low risk	Low risk	Low risk	Low risk
275	Some concerns	Low risk	Some concerns	Some concerns	Some concerns	Some concerns
276	Low risk	Low risk	Low risk	Low risk	Some concerns	Some concerns
277	Low risk	Low risk	Low risk	Some concerns	Low risk	Some concerns
278	Low risk	Low risk	Some concerns	Low risk	Low risk	Some concerns
279	Low risk	Low risk	Some concerns	Low risk	Some concerns	Some concerns
280	Low risk	Some concerns	Low risk	Some concerns	Low risk	Some concerns
281	Low risk	Some concerns	Low risk	Some concerns	Some concerns	Some concerns
282	Some concerns	High risk	Some concerns	Low risk	Some concerns	High risk
283	Some concerns	High risk	Some concerns	Low risk	Some concerns	High risk
284	Some concerns	Some concerns	Low risk	Some concerns	Some concerns	Some concerns
285	Some concerns	High risk	Low risk	Low risk	Some concerns	High risk
286	Some concerns	High risk	Some concerns	Some concerns	Some concerns	High risk
287	Low risk	Some concerns	Low risk	Low risk	Some concerns	Some concerns
288	Low risk	Some concerns	Low risk	Some concerns	Low risk	Some concerns
289	Low risk	Some concerns	Low risk	Some concerns	Some concerns	Some concerns
290	Low risk	Low risk	Low risk	Low risk	Low risk	Low risk
291	Some concerns	Low risk	Some concerns	Some concerns	Some concerns	Some concerns
292	Low risk	Low risk	Some concerns	Low risk	Some concerns	Some concerns
293	Low risk	Low risk	Some concerns	Low risk	Low risk	Some concerns
294	Low risk	High risk	Some concerns	Low risk	Some concerns	High risk
295	High risk	High risk	High risk	Low risk	Some concerns	High risk
296	Some concerns	Some concerns	Low risk	Low risk	Some concerns	Some concerns
297	Low risk	High risk	Some concerns	Low risk	Some concerns	Some concerns
298	Low risk	Low risk	Low risk	Low risk	Low risk	Low risk
299	Low risk	Low risk	Some concerns	Low risk	Some concerns	Some concerns
300	Some concerns	Some concerns	Some concerns	Low risk	Some concerns	Some concerns
301	Low risk	Low risk	Some concerns	Low risk	Some concerns	Some concerns
302	Some concerns	High risk	Some concerns	Low risk	Some concerns	High risk
303	Low risk	Some concerns	Some concerns	Low risk	Some concerns	Some concerns
304	Low risk	Low risk	Some concerns	Low risk	Low risk	Some concerns
305	Low risk	High risk	Low risk	Low risk	Some concerns	High risk
306	Some concerns	High risk	Low risk	Some concerns	Some concerns	High risk
307	Low risk	Some concerns	High risk	Low risk	Some concerns	High risk
308	Low risk	Some concerns	High risk	Some concerns	Some concerns	High risk
309	Some concerns	Low risk	Some concerns	Low risk	Some concerns	Some concerns
310	Some concerns	Low risk	Low risk	Low risk	Some concerns	Some concerns
311	High risk	Low risk	Some concerns	Low risk	Some concerns	High risk
312	Low risk	Some concerns	Low risk	Low risk	Some concerns	Some concerns
313	Low risk	Low risk	Some concerns	Low risk	Some concerns	Some concerns
314	High risk	Some concerns	Low risk	Low risk	Some concerns	High risk
315	Low risk	Low risk	Low risk	Low risk	Low risk	Low risk
316	Low risk	Low risk	Some concerns	Low risk	Some concerns	Some concerns
317	Low risk	Some concerns	Low risk	Low risk	Some concerns	Some concerns
318	Low risk	Low risk	Low risk	Low risk	Some concerns	Low risk
319	Low risk	Some concerns	Low risk	Low risk	Low risk	Some concerns
320	Low risk	Low risk	Some concerns	Low risk	Some concerns	Some concerns
321	Some concerns	Some concerns	Some concerns	Low risk	Some concerns	Some concerns
322	Low risk	Some concerns	Some concerns	Low risk	Some concerns	Some concerns
323	Some concerns	Some concerns	Some concerns	Low risk	Some concerns	Some concerns
324	Low risk	Some concerns	Low risk	Some concerns	Low risk	Some concerns
325	Low risk	Low risk	Some concerns	Some concerns	Some concerns	Some concerns
326	Some concerns	Some concerns	High risk	Low risk	Some concerns	High risk
327	Some concerns	Low risk	High risk	Low risk	Some concerns	High risk
328	Low risk	Low risk	High risk	Some concerns	Some concerns	High risk
329	Some concerns	High risk	Some concerns	Low risk	Some concerns	High risk
330	Low risk	Some concerns	Low risk	Some concerns	Low risk	Some concerns
331	Low risk	Some concerns	Low risk	Low risk	Some concerns	Some concerns
332	Low risk	High risk	Some concerns	High risk	Some concerns	High risk
333	Low risk	Some concerns	Low risk	Some concerns	Some concerns	Some concerns
334	Low risk	Low risk	Some concerns	Low risk	Some concerns	Some concerns
335	Low risk	Some concerns	Some concerns	Low risk	Low risk	Some concerns
336	Low risk	Some concerns	Some concerns	Low risk	Some concerns	Some concerns
337	Some concerns	High risk	Low risk	Low risk	Some concerns	High risk
338	Low risk	Some concerns	Some concerns	Low risk	Some concerns	Some concerns
339	Low risk	Some concerns	Low risk	Low risk	Some concerns	Some concerns
340	Low risk	Low risk	High risk	Low risk	Some concerns	High risk
341	Low risk	Low risk	Some concerns	Low risk	Some concerns	Some concerns
342	Some concerns	High risk	Some concerns	Low risk	Some concerns	High risk
343	Low risk	Some concerns	Some concerns	Some concerns	Some concerns	Some concerns
344	Low risk	Some concerns	High risk	Low risk	Some concerns	High risk
345	Some concerns	High risk	Low risk	Low risk	Some concerns	High risk
346	Low risk	Some concerns	Low risk	Low risk	Some concerns	Some concerns
347	Low risk	Low risk	Some concerns	Low risk	Some concerns	Some concerns
348	Low risk	Some concerns	High risk	Some concerns	Some concerns	High risk
349	Low risk	Low risk	Some concerns	Low risk	Low risk	Low risk
350	Low risk	Low risk	Some concerns	Low risk	Low risk	Low risk
351	Low risk	High risk	Some concerns	Low risk	Low risk	High risk
352	Some concerns	Some concerns	Some concerns	Some concerns	Some concerns	Some concerns
353	Some concerns	Some concerns	Low risk	Low risk	Some concerns	Some concerns
354	Low risk	High risk	Low risk	Low risk	Some concerns	High risk
355	Low risk	Some concerns	High risk	Some concerns	Low risk	High risk
356	High risk	High risk	High risk	Some concerns	Some concerns	High risk
357	Low risk	Some concerns	Low risk	Low risk	Low risk	Some concerns
358	Low risk	Some concerns	Low risk	Some concerns	Low risk	Some concerns
359	Low risk	Some concerns	Low risk	Low risk	Low risk	Some concerns
360	Some concerns	High risk	Low risk	Some concerns	Low risk	High risk
361	Low risk	Low risk	Some concerns	Low risk	Some concerns	Some concerns
362	Some concerns	Low risk	Some concerns	Low risk	Some concerns	Some concerns
363	Low risk	Low risk	Some concerns	Some concerns	Low risk	Some concerns
364	Low risk	Some concerns	Low risk	Some concerns	Low risk	Some concerns
365	Some concerns	Some concerns	Some concerns	Low risk	Some concerns	Some concerns
366	Low risk	Low risk	Some concerns	Low risk	Some concerns	Some concerns
367	Low risk	Low risk	Some concerns	Low risk	Some concerns	Some concerns
368	Some concerns	Some concerns	High risk	Some concerns	Some concerns	High risk
369	Low risk	Low risk	Low risk	Low risk	Low risk	Low risk
370	Some concerns	High risk	Some concerns	Low risk	Some concerns	High risk
371	Low risk	High risk	Low risk	Low risk	Low risk	High risk
372	Low risk	Some concerns	Some concerns	Low risk	Low risk	Some concerns
373	Low risk	Some concerns	Some concerns	Some concerns	Some concerns	Some concerns
374	Some concerns	High risk	Some concerns	Low risk	Some concerns	High risk
375	Low risk	Some concerns	Low risk	Low risk	Low risk	Some concerns
376	Low risk	Some concerns	Low risk	Some concerns	Some concerns	Some concerns
377	Low risk	High risk	Some concerns	Low risk	Some concerns	High risk
378	Some concerns	High risk	High risk	Some concerns	Some concerns	High risk
379	Some concerns	High risk	Some concerns	Low risk	Some concerns	High risk
380	Some concerns	High risk	Some concerns	Low risk	Some concerns	High risk
381	Low risk	Some concerns	Some concerns	Low risk	Some concerns	Some concerns
382	Low risk	Some concerns	Some concerns	Low risk	Low risk	Some concerns
383	Some concerns	High risk	Low risk	Low risk	Some concerns	High risk
384	Some concerns	Low risk	Some concerns	Low risk	Some concerns	Some concerns
385	Low risk	High risk	Some concerns	Some concerns	Some concerns	High risk
386	Low risk	Some concerns	High risk	Some concerns	Some concerns	High risk
387	Low risk	Some concerns	Low risk	Some concerns	Low risk	Some concerns
388	Low risk	High risk	Low risk	Some concerns	Low risk	High risk
389	Low risk	Low risk	Some concerns	Low risk	Some concerns	Some concerns
390	Low risk	Low risk	Low risk	Low risk	Low risk	Low risk
391	Low risk	Low risk	Some concerns	Low risk	Some concerns	Some concerns
392	Some concerns	High risk	Low risk	High risk	Some concerns	High risk
393	Some concerns	Some concerns	Low risk	Some concerns	Some concerns	Some concerns
394	Low risk	Some concerns	Some concerns	Low risk	Low risk	Some concerns
395	Some concerns	High risk	Low risk	Some concerns	Some concerns	High risk
396	Low risk	Low risk	Low risk	Low risk	Low risk	Low risk
397	Low risk	Some concerns	High risk	Low risk	Some concerns	High risk
398	Some concerns	High risk	Some concerns	Some concerns	Some concerns	High risk
399	High risk	High risk	Low risk	Low risk	Some concerns	High risk
400	Low risk	Low risk	High risk	Some concerns	Some concerns	High risk
401	Low risk	Some concerns	Some concerns	Some concerns	Some concerns	Some concerns
402	Low risk	Some concerns	Low risk	Low risk	Some concerns	Some concerns
403	Low risk	High risk	Some concerns	Low risk	Some concerns	High risk
404	Low risk	Low risk	Some concerns	Low risk	Low risk	Some concerns
405	Some concerns	Some concerns	Some concerns	High risk	Some concerns	High risk
406	Some concerns	High risk	Some concerns	Some concerns	Some concerns	High risk
407	Low risk	Some concerns	Some concerns	Some concerns	Some concerns	Some concerns
408	High risk	High risk	Some concerns	Some concerns	Some concerns	High risk
409	Low risk	Some concerns	Some concerns	Low risk	Some concerns	Some concerns
410	Low risk	Some concerns	High risk	Some concerns	Some concerns	High risk
411	Low risk	Some concerns	Low risk	Some concerns	Some concerns	Some concerns
412	Low risk	Some concerns	Low risk	Some concerns	Low risk	Some concerns
413	Low risk	Some concerns	Some concerns	Low risk	Some concerns	Some concerns
414	Some concerns	High risk	Some concerns	Low risk	Some concerns	High risk
415	Low risk	Low risk	Some concerns	Low risk	Some concerns	Some concerns
416	Low risk	Low risk	High risk	Low risk	Some concerns	High risk
417	Low risk	Low risk	High risk	Low risk	Some concerns	High risk
418	Low risk	Some concerns	Some concerns	Low risk	Low risk	Some concerns
419	Low risk	Some concerns	Some concerns	Low risk	Low risk	Some concerns
420	Low risk	Low risk	Low risk	Low risk	Low risk	Low risk
421	Low risk	Low risk	Some concerns	Low risk	Some concerns	Some concerns
422	Low risk	Some concerns	Low risk	Low risk	Low risk	Some concerns
423	Some concerns	Some concerns	High risk	Some concerns	Some concerns	High risk
424	Some concerns	Some concerns	High risk	Low risk	Some concerns	High risk
425	Low risk	Some concerns	Low risk	Low risk	Some concerns	Some concerns
426	Low risk	Low risk	Low risk	Low risk	Low risk	Low risk
427	Some concerns	Some concerns	Low risk	Low risk	Some concerns	Some concerns
428	Low risk	Low risk	High risk	Low risk	Some concerns	High risk
429	Some concerns	Some concerns	Low risk	Low risk	Some concerns	Some concerns
430	Low risk	Some concerns	Low risk	Low risk	Low risk	Some concerns
431	High risk	Some concerns	Some concerns	Low risk	Some concerns	High risk
432	Low risk	Low risk	Some concerns	Low risk	Low risk	Some concerns
433	Low risk	Low risk	Some concerns	Low risk	Some concerns	Some concerns
434	Low risk	High risk	Some concerns	Some concerns	Some concerns	High risk
435	Low risk	Some concerns	Some concerns	Low risk	Low risk	Some concerns
436	Some concerns	High risk	Some concerns	Some concerns	Some concerns	High risk
437	Low risk	Some concerns	Some concerns	Low risk	Some concerns	Some concerns
438	Some concerns	High risk	Some concerns	Low risk	Some concerns	High risk
439	Low risk	Some concerns	Low risk	Some concerns	Some concerns	Some concerns
440	Low risk	Low risk	Low risk	Low risk	Some concerns	Some concerns
441	Some concerns	Some concerns	Some concerns	Some concerns	Some concerns	Some concerns
442	Some concerns	Low risk	Some concerns	Low risk	Some concerns	Some concerns
443	Low risk	Some concerns	Low risk	Low risk	Low risk	Some concerns
444	Low risk	Some concerns	Low risk	Some concerns	Low risk	Some concerns
445	Low risk	High risk	Some concerns	Some concerns	Some concerns	High risk
446	Low risk	Low risk	Some concerns	Low risk	Some concerns	Some concerns
447	Low risk	Some concerns	Some concerns	Low risk	Some concerns	Some concerns
448	Low risk	Some concerns	Low risk	Low risk	Low risk	Some concerns
449	Some concerns	Low risk	Some concerns	Some concerns	Some concerns	Some concerns
450	Low risk	Some concerns	High risk	Low risk	Some concerns	High risk
451	Low risk	Some concerns	High risk	Some concerns	Low risk	High risk
452	Low risk	Some concerns	Low risk	Low risk	Some concerns	Some concerns
453	Low risk	Low risk	Some concerns	Low risk	Some concerns	Some concerns
454	Low risk	Low risk	Low risk	Low risk	Low risk	Low risk
455	Low risk	High risk	Low risk	Low risk	Low risk	Some concerns
456	Low risk	Some concerns	Some concerns	Low risk	Some concerns	Some concerns
457	Some concerns	High risk	Low risk	High risk	Some concerns	High risk
458	Some concerns	Some concerns	Low risk	Some concerns	Some concerns	Some concerns
459	Low risk	Some concerns	Some concerns	Low risk	Some concerns	Some concerns
460	Low risk	Low risk	Low risk	Some concerns	Some concerns	Some concerns
461	Low risk	Low risk	Low risk	Low risk	Low risk	Low risk
462	Some concerns	High risk	Some concerns	Some concerns	Some concerns	High risk
463	High risk	High risk	Some concerns	Some concerns	Some concerns	High risk
464	Some concerns	High risk	High risk	Some concerns	Some concerns	High risk
465	Low risk	Low risk	Some concerns	Low risk	Some concerns	Some concerns
466	Low risk	Low risk	Low risk	Low risk	Low risk	Low risk
467	Low risk	Low risk	Low risk	Low risk	Some concerns	Some concerns
468	Low risk	Some concerns	Some concerns	Low risk	Some concerns	Some concerns
469	Low risk	Some concerns	Low risk	Low risk	Some concerns	Some concerns
470	Low risk	Low risk	Low risk	Low risk	Low risk	Low risk
471	Low risk	Low risk	Low risk	Low risk	Some concerns	Some concerns
472	Low risk	Some concerns	High risk	Some concerns	Some concerns	High risk
473	Some concerns	High risk	Some concerns	Some concerns	Some concerns	High risk
474	Some concerns	Some concerns	Some concerns	Some concerns	Some concerns	Some concerns
475	Some concerns	Some concerns	Low risk	Low risk	Some concerns	Some concerns
476	Low risk	Some concerns	High risk	Low risk	High risk	High risk
477	Some concerns	High risk	Some concerns	Low risk	Some concerns	High risk
478	Some concerns	Some concerns	High risk	Some concerns	Some concerns	High risk
479	Some concerns	Low risk	Some concerns	Low risk	Some concerns	Some concerns
480	Some concerns	High risk	Low risk	Low risk	Some concerns	High risk
481	Low risk	Some concerns	Some concerns	Low risk	Some concerns	Some concerns
482	Low risk	Low risk	Low risk	Low risk	Some concerns	Some concerns
483	Low risk	Some concerns	Low risk	Low risk	Low risk	Some concerns
484	Some concerns	Some concerns	Low risk	Low risk	Some concerns	Some concerns
485	Low risk	Some concerns	Low risk	Low risk	Low risk	Some concerns
486	Low risk	Some concerns	High risk	Low risk	Some concerns	High risk
487	Some concerns	Some concerns	Some concerns	Some concerns	Some concerns	Some concerns
488	Low risk	Some concerns	Some concerns	Low risk	Low risk	Some concerns
489	Low risk	Some concerns	Some concerns	Low risk	Some concerns	Some concerns
490	Some concerns	Low risk	Low risk	Some concerns	Some concerns	Some concerns
491	Low risk	Some concerns	Low risk	Some concerns	Some concerns	Some concerns
492	Low risk	Low risk	Some concerns	Low risk	Some concerns	Some concerns
493	Some concerns	High risk	Some concerns	Some concerns	Some concerns	High risk
494	Low risk	Low risk	Some concerns	Low risk	Some concerns	Some concerns
495	Low risk	Some concerns	Low risk	Low risk	Low risk	Some concerns
496	Low risk	Low risk	High risk	Some concerns	Low risk	High risk
497	Some concerns	High risk	Some concerns	Low risk	Some concerns	High risk
498	Low risk	Low risk	Some concerns	Low risk	Some concerns	Some concerns
499	Low risk	Low risk	Some concerns	Low risk	Some concerns	Some concerns
500	Some concerns	High risk	Some concerns	Some concerns	Some concerns	High risk
501	Low risk	Low risk	Low risk	Low risk	Low risk	Low risk
502	Low risk	Some concerns	Low risk	Low risk	Low risk	Some concerns
503	Low risk	Some concerns	Some concerns	Low risk	Some concerns	Some concerns
504	Some concerns	High risk	Low risk	Low risk	Some concerns	High risk
505	Low risk	Some concerns	Low risk	Low risk	Some concerns	Some concerns
506	Low risk	Some concerns	Low risk	Low risk	Low risk	Some concerns
507	Low risk	Low risk	High risk	Low risk	Some concerns	High risk
508	Low risk	Some concerns	Low risk	Low risk	Some concerns	Some concerns
509	Low risk	Some concerns	Low risk	Some concerns	Low risk	Some concerns
510	Low risk	High risk	Some concerns	Low risk	Some concerns	High risk
511	Low risk	High risk	Some concerns	Low risk	Some concerns	High risk
512	Low risk	Low risk	Some concerns	Low risk	Some concerns	Some concerns
513	Low risk	Some concerns	Low risk	Some concerns	Low risk	Some concerns
514	Low risk	Some concerns	High risk	Low risk	Some concerns	High risk
515	Some concerns	High risk	High risk	Low risk	Some concerns	High risk
516	Low risk	High risk	Low risk	Low risk	Some concerns	Some concerns
517	Low risk	High risk	Some concerns	Low risk	Low risk	Some concerns
518	Some concerns	Some concerns	Low risk	Low risk	Some concerns	Some concerns
519	Some concerns	Low risk	Some concerns	Low risk	Some concerns	Some concerns
520	Some concerns	High risk	Low risk	Low risk	Some concerns	High risk
521	Some concerns	High risk	Some concerns	Low risk	Some concerns	High risk
522	Low risk	Low risk	High risk	Low risk	Some concerns	High risk
523	Low risk	Some concerns	Low risk	Low risk	Low risk	Some concerns
524	Low risk	Low risk	Some concerns	Some concerns	Low risk	Some concerns
525	Low risk	Some concerns	High risk	Low risk	Low risk	High risk
526	Some concerns	Some concerns	Some concerns	Some concerns	Some concerns	Some concerns
527	Low risk	Low risk	Some concerns	Low risk	Low risk	Some concerns
528	Low risk	Low risk	Some concerns	Low risk	Some concerns	Some concerns
529	High risk	Some concerns	Low risk	Low risk	Low risk	Some concerns
530	Some concerns	Some concerns	Low risk	Low risk	Some concerns	Some concerns
531	Low risk	Low risk	Some concerns	Low risk	Some concerns	Some concerns
532	Low risk	High risk	Low risk	Low risk	Low risk	High risk
533	Low risk	Low risk	Low risk	Low risk	Low risk	Low risk
534	Low risk	Some concerns	Low risk	Low risk	Some concerns	Some concerns
535	Some concerns	Low risk	Some concerns	Some concerns	Some concerns	Some concerns
536	Low risk	Low risk	Low risk	Some concerns	Some concerns	Some concerns
537	High risk	High risk	Low risk	Some concerns	Some concerns	High risk
538	Low risk	Some concerns	Some concerns	Some concerns	Some concerns	Some concerns
539	Some concerns	High risk	Some concerns	Low risk	Some concerns	High risk
540	Some concerns	High risk	Some concerns	Low risk	Some concerns	High risk
541	Low risk	Some concerns	Some concerns	Low risk	Some concerns	Some concerns
542	Low risk	Some concerns	Low risk	Low risk	Low risk	Some concerns
543	Some concerns	Some concerns	Some concerns	Some concerns	Some concerns	Some concerns
544	Low risk	Low risk	Some concerns	Some concerns	Some concerns	Some concerns
545	Some concerns	Some concerns	Some concerns	Low risk	Some concerns	Some concerns
546	Low risk	Low risk	Some concerns	Low risk	Some concerns	Some concerns
547	Low risk	Low risk	Some concerns	Low risk	Some concerns	Some concerns
548	Low risk	High risk	Some concerns	Low risk	Some concerns	High risk
549	Low risk	Some concerns	Low risk	Low risk	Some concerns	Some concerns
550	Low risk	Some concerns	Some concerns	Low risk	Some concerns	Some concerns
551	Low risk	Low risk	Low risk	Low risk	Some concerns	Some concerns
552	Low risk	Low risk	Low risk	Low risk	Some concerns	Low risk
553	Low risk	High risk	Some concerns	Low risk	Some concerns	High risk
554	Low risk	Low risk	Some concerns	Some concerns	Some concerns	Some concerns
555	Low risk	High risk	Some concerns	Low risk	Some concerns	High risk
556	Low risk	Some concerns	Some concerns	Low risk	Low risk	Some concerns
557	Low risk	Low risk	Some concerns	Low risk	Some concerns	Some concerns
558	Low risk	Some concerns	Low risk	Low risk	Some concerns	Some concerns
559	Low risk	Some concerns	Some concerns	Low risk	Some concerns	Some concerns
560	Low risk	Some concerns	Low risk	Low risk	Low risk	Some concerns
561	Low risk	Low risk	Some concerns	Low risk	Some concerns	Some concerns
562	Low risk	Low risk	Low risk	Low risk	Low risk	Low risk
563	Low risk	Some concerns	Some concerns	Low risk	Low risk	Some concerns
564	Some concerns	Some concerns	Low risk	Low risk	Some concerns	Some concerns
565	Low risk	Low risk	Low risk	Some concerns	Low risk	Some concerns
566	Low risk	Low risk	Some concerns	Low risk	Some concerns	Some concerns
567	Low risk	Some concerns	Some concerns	Some concerns	Some concerns	Some concerns
568	Low risk	Some concerns	Some concerns	Some concerns	Low risk	Some concerns
569	Some concerns	High risk	Some concerns	Low risk	Some concerns	High risk
570	Some concerns	Some concerns	Low risk	Some concerns	Some concerns	Some concerns
571	Low risk	High risk	High risk	Some concerns	Some concerns	High risk
572	Low risk	Low risk	Low risk	Low risk	Low risk	Low risk
573	Low risk	Some concerns	High risk	Some concerns	Low risk	High risk
574	Some concerns	Some concerns	Some concerns	Low risk	Some concerns	Some concerns
575	Low risk	Some concerns	Some concerns	Low risk	Some concerns	Some concerns
576	Some concerns	High risk	Some concerns	Low risk	Some concerns	High risk
577	Low risk	Low risk	Some concerns	Some concerns	Some concerns	Some concerns
578	Low risk	Low risk	High risk	Low risk	Some concerns	High risk
579	Low risk	Low risk	Some concerns	Low risk	Low risk	Some concerns
580	Low risk	Low risk	Some concerns	Low risk	Some concerns	Some concerns
581	Some concerns	Some concerns	Some concerns	Some concerns	Some concerns	Some concerns
582	Low risk	Some concerns	Some concerns	Low risk	Low risk	Some concerns
583	Low risk	Low risk	Low risk	Some concerns	Low risk	Some concerns
584	Low risk	Some concerns	Low risk	Some concerns	Low risk	Some concerns
585	Low risk	High risk	High risk	Low risk	Some concerns	High risk
586	Low risk	Some concerns	Some concerns	Low risk	Some concerns	Some concerns
587	Low risk	Low risk	Low risk	Low risk	Some concerns	Low risk
588	Some concerns	Low risk	Some concerns	Low risk	Some concerns	Some concerns
589	Low risk	Low risk	Some concerns	Low risk	Low risk	Low risk
590	Some concerns	High risk	Some concerns	Some concerns	Some concerns	High risk
591	Low risk	Low risk	Some concerns	Low risk	Some concerns	Some concerns
592	Some concerns	Some concerns	Some concerns	Some concerns	Some concerns	Some concerns
593	High risk	Some concerns	Some concerns	Low risk	Some concerns	High risk
594	Low risk	Some concerns	Some concerns	Some concerns	Some concerns	Some concerns
595	Low risk	Low risk	Some concerns	Low risk	Some concerns	Some concerns
596	Low risk	Low risk	Some concerns	Low risk	Some concerns	Some concerns
597	Some concerns	High risk	High risk	Some concerns	Some concerns	High risk
598	Low risk	High risk	High risk	Some concerns	Some concerns	High risk
599	Some concerns	Some concerns	High risk	Low risk	Some concerns	High risk
600	Low risk	Some concerns	High risk	Low risk	Low risk	High risk
601	Low risk	Low risk	Some concerns	Low risk	Some concerns	Some concerns
602	Some concerns	Some concerns	High risk	Some concerns	Some concerns	High risk
603	Low risk	Some concerns	High risk	Some concerns	Some concerns	High risk
604	Some concerns	Low risk	Some concerns	Low risk	Some concerns	Some concerns
605	Some concerns	High risk	Some concerns	Low risk	Some concerns	High risk
606	Low risk	Low risk	High risk	Low risk	Some concerns	High risk
607	Low risk	Some concerns	Low risk	Low risk	Low risk	Some concerns
608	Some concerns	Some concerns	Some concerns	Low risk	Some concerns	Some concerns
609	Low risk	Some concerns	Low risk	Low risk	Low risk	Some concerns
610	Low risk	Low risk	Low risk	Low risk	Low risk	Low risk
611	Low risk	Some concerns	Low risk	Low risk	Low risk	Some concerns
612	Some concerns	Low risk	High risk	Low risk	Some concerns	High risk
613	Low risk	Some concerns	Some concerns	Low risk	Low risk	Some concerns
614	Low risk	Some concerns	High risk	Some concerns	Some concerns	High risk
615	Low risk	Some concerns	Some concerns	Some concerns	Some concerns	Some concerns
616	Low risk	Some concerns	High risk	Low risk	Some concerns	High risk
617	Low risk	High risk	Low risk	Low risk	Some concerns	High risk
618	High risk	High risk	Low risk	Low risk	Some concerns	High risk
619	Some concerns	Some concerns	High risk	Low risk	Some concerns	High risk
620	Some concerns	High risk	High risk	Some concerns	Some concerns	High risk
621	High risk	Some concerns	Low risk	Low risk	Some concerns	High risk
622	Low risk	Some concerns	High risk	Low risk	Some concerns	High risk
623	Some concerns	Some concerns	Some concerns	Low risk	Some concerns	Some concerns
624	Low risk	High risk	Some concerns	Some concerns	Some concerns	High risk
625	Low risk	Some concerns	High risk	Some concerns	Some concerns	High risk
626	Some concerns	High risk	Some concerns	Low risk	Some concerns	High risk
627	Some concerns	Some concerns	High risk	Some concerns	Some concerns	High risk
628	Some concerns	Some concerns	High risk	Low risk	Some concerns	High risk
629	Low risk	Low risk	Low risk	Low risk	Low risk	Low risk
630	Low risk	Some concerns	Some concerns	Low risk	Some concerns	Some concerns
631	Low risk	Some concerns	Some concerns	Low risk	Some concerns	Some concerns
632	Some concerns	Some concerns	Some concerns	Low risk	Some concerns	Some concerns
633	Low risk	Low risk	Low risk	Low risk	Low risk	Low risk
634	Low risk	Low risk	Some concerns	Some concerns	Some concerns	Some concerns
635	Some concerns	Some concerns	Some concerns	Low risk	Some concerns	Some concerns
636	Some concerns	Low risk	High risk	Some concerns	Some concerns	High risk
637	Low risk	Some concerns	High risk	Some concerns	Some concerns	High risk
638	Some concerns	High risk	Some concerns	Some concerns	Some concerns	High risk
639	Some concerns	Low risk	Low risk	Some concerns	Some concerns	Some concerns
640	Some concerns	High risk	Low risk	Some concerns	Some concerns	High risk
641	Some concerns	High risk	Some concerns	Some concerns	Some concerns	High risk
642	Low risk	Low risk	Low risk	Low risk	Low risk	Low risk
643	Low risk	Low risk	Some concerns	Low risk	Low risk	Low risk
644	Low risk	Some concerns	Some concerns	Some concerns	Some concerns	Some concerns
645	Low risk	High risk	Low risk	Some concerns	Some concerns	High risk
646	Low risk	Some concerns	Some concerns	Low risk	Some concerns	Some concerns
647	Low risk	Some concerns	Low risk	Low risk	Some concerns	Some concerns
648	Some concerns	High risk	Some concerns	Some concerns	Some concerns	High risk
649	Low risk	Some concerns	Low risk	Low risk	Low risk	Some concerns
650	Low risk	Some concerns	Low risk	Low risk	Low risk	Some concerns
651	Some concerns	Some concerns	Low risk	Some concerns	Some concerns	Some concerns
652	Low risk	Low risk	Some concerns	Some concerns	Some concerns	Some concerns
653	Low risk	High risk	Some concerns	Low risk	Some concerns	High risk
654	Low risk	Some concerns	Low risk	Low risk	Low risk	Some concerns
655	Some concerns	Low risk	Some concerns	Low risk	Some concerns	Some concerns
656	Some concerns	High risk	Some concerns	Some concerns	Some concerns	High risk
657	Some concerns	High risk	Some concerns	Some concerns	Some concerns	High risk
658	Low risk	Some concerns	Some concerns	Low risk	Low risk	Some concerns
659	Low risk	Low risk	Some concerns	Low risk	Low risk	Some concerns
660	Low risk	Some concerns	Low risk	Low risk	Low risk	Some concerns
661	Low risk	Some concerns	Low risk	Low risk	Low risk	Some concerns
662	Some concerns	Some concerns	High risk	Low risk	Some concerns	High risk
663	Low risk	Low risk	Low risk	Low risk	Low risk	Low risk
664	Low risk	Low risk	High risk	Low risk	Some concerns	High risk
665	Some concerns	Some concerns	Some concerns	Some concerns	Some concerns	Some concerns
666	Low risk	Some concerns	Low risk	Some concerns	Some concerns	Some concerns
667	Low risk	Some concerns	Low risk	Low risk	Some concerns	Some concerns
668	High risk	High risk	Some concerns	Some concerns	Some concerns	High risk
669	Some concerns	Some concerns	Some concerns	Low risk	Some concerns	Some concerns
670	Low risk	Some concerns	Low risk	Low risk	Some concerns	Some concerns
671	Low risk	Low risk	High risk	Low risk	Some concerns	High risk
672	Some concerns	High risk	Some concerns	Low risk	Some concerns	High risk
673	Low risk	Some concerns	Some concerns	Low risk	Some concerns	Some concerns
674	Some concerns	High risk	Some concerns	Low risk	Some concerns	High risk
675	Low risk	Some concerns	Some concerns	Low risk	Some concerns	Some concerns
676	Low risk	Some concerns	Low risk	Low risk	Low risk	Some concerns
677	Some concerns	Some concerns	Some concerns	Some concerns	Some concerns	Some concerns
678	Low risk	Some concerns	Some concerns	Low risk	Low risk	Some concerns
679	Some concerns	Low risk	Low risk	Low risk	Some concerns	Some concerns
680	Low risk	Low risk	Low risk	Low risk	Some concerns	Some concerns
681	Low risk	Some concerns	Low risk	Low risk	Low risk	Some concerns
682	Some concerns	Some concerns	High risk	Low risk	Some concerns	High risk
683	Low risk	Some concerns	Some concerns	Low risk	Some concerns	Some concerns
684	Some concerns	High risk	Low risk	Some concerns	Some concerns	High risk
685	Some concerns	High risk	High risk	Some concerns	Some concerns	High risk
686	Low risk	Some concerns	Some concerns	Low risk	Some concerns	Some concerns
687	Some concerns	High risk	High risk	Some concerns	Some concerns	High risk
688	Some concerns	Some concerns	Some concerns	Low risk	Some concerns	Some concerns
689	Some concerns	Some concerns	High risk	Low risk	Some concerns	High risk
690	Low risk	High risk	Low risk	Low risk	Low risk	Some concerns
691	Some concerns	High risk	Some concerns	Low risk	Some concerns	High risk
692	Low risk	High risk	Low risk	Some concerns	Some concerns	High risk
693	Low risk	High risk	Some concerns	Some concerns	Low risk	Some concerns
694	Some concerns	Some concerns	Some concerns	Low risk	Some concerns	Some concerns
695	Low risk	High risk	Some concerns	Low risk	Some concerns	High risk

## Sheet: ROB2 Definitions
Risk of bias was assessed using the Cochrane Risk of Bias 2 (RoB 2) tool. Domains: - Randomisation process: Bias arising from the randomisation process - Deviations from intended interventions: Bias due to deviations from intended interventions - Missing outcome data: Bias due to missing outcome data - Measurement of the outcome: Bias in outcome measurement - Selection of the reported result: Bia…
Abbreviations: RoB 2: Risk of Bias 2 RCT: Randomized Controlled Trial
