# Supplementary material
Source: Research Square preprint supplement (doi:10.21203/rs.3.rs-9212126/v1)
Supplement: Supplementary file 3 [file 6ec9dfdfeddc9baddbbe0fde.xlsx]

## Sheet: Characterstics of studies
Study ID	Study Title	Authors	Year	Trial registration	Country	Condition	Income level	Funding	Sample size	Study design	Setting	Blinding	Intervention	Outcomes	Core outcome set	CONSORT score (n/37)	CONSORT adherence (%)
1	Efficacy of hypnotherapy on pain intensity and psychological distress among women with premenstrual dysphoric disorder: Applicability of suggestions focused on cognitive flexibility and ego strength	Nader Abazari, Leila Heydarinasab, Hamid Yaghubi, Hojjatollah Farahani	2021	IRCT20201110049332N1	Iran	PMDD	Upper-middle-income	Not reported	60	Randomized controlled trial	University psychology clinic	Open-label	8-session hypnotherapy protocol vs no-treatment control	Clinical (pain), psychological (DASS-42)	None	12	32.4
2	Combined pioglitazone–metformin and clomiphene citrate versus metformin and clomiphene citrate in induction of ovulation in women with clomiphene citrate–resistant polycystic ovary syndrome	Ghada Abdel Fattah, Maged Al Mohammady, Dalia Ahmed Hamed	2013	Not reported	Egypt	PCOS	Lower-middle-income	Self-funded	100	Randomized controlled trial	University outpatient infertility clinic	Not blinded (drug type obvious)	Pioglitazone 15 mg + metformin 850 mg ×10 days + CC 100 mg ×5 days vs metformin 500 mg TID + CC 100 mg ×5 days	Ovulation, pregnancy, hormonal	Not reported	19	51.4
3	Reproductive outcome after letrozole versus laparoscopic ovarian drilling for clomiphene-resistant polycystic ovary syndrome	Mohamad S. Abdellah	2011	Not reported	Egypt	PCOS	Lower-middle-income	None reported	147	Randomized controlled trial	Single centre (Women’s Health Center, Assiut University)	Not blinded	Letrozole 5 mg days 3–7 for up to 6 cycles vs laparoscopic ovarian drilling	Ovulation, pregnancy, loss, endometrial thickness	Not reported	18	48.6
4	A randomized controlled trial of the effect of rosiglitazone and clomiphene citrate versus clomiphene citrate alone in overweight/obese women with polycystic ovary syndrome	Iman Abdel Mohsen	2012	Not registered	Egypt	PCOS	Lower-middle-income	Not reported	100	Prospective randomized controlled trial	Single tertiary hospital (Kasr Al-Aini Hospital)	Open-label (no blinding reported)	Rosiglitazone 4 mg twice daily + CC 100 mg days 3–7 vs CC alone	Clinical (ovulation, pregnancy) and metabolic (insulin, glucose)	Not reported	17	45.9
5	Changing Paradigms: Neonatal Outcomes after Oral Metformin versus Insulin in the Control of Gestational Diabetes Mellitus	A.E. Abd El Tawwab, M.S. Mahmoud, H.A. El-Kady, A.A. Elashiry, H.G. Elsayed, M.F. Seifelnasr	2025	Not reported	Egypt	GDM	Lower-middle-income	Not stated (Fayoum University institutional research)	200	Non-inferiority randomized controlled trial	Multicentre (Fayoum University Hospitals – OB/GYN, Family Medicine, and NICU units)	Open-label (participants and clinicians unblinded; outcome assessors blinded)	Metformin (500–2500 mg/day titrated) vs insulin (0.9 IU/kg/day; 50% intermediate, 50% regular pre-meal)	Clinical, biochemical, neonatal	Not reported	25	67.6
6	Effectiveness of cognitive-behavioral therapy (CBT) in improving the quality of life and psychological fatigue in women with polycystic ovarian syndrome: a randomized controlled clinical trial	Leila Abdollahi, Mojgan Mirghafourvand, Jalil Babapour Kheyradin, Mozhdeh Mohammadi	2019	IRCT2016111410324N35	Iran	PCOS	Upper-middle-income	Tabriz University of Medical Sciences (full funding)	74	Randomized controlled clinical trial	Gynecology clinics + Imam Khomeini Hospital, Saqqez	Single-blind (data analyst blinded only)	8 weekly group CBT sessions (45–60 min) vs routine care; both groups continued usual medical therapy (e.g., metformin, spironolactone)	Patient-reported outcomes: QoL (PCOSQ), psychological fatigue (FIS)	Not reported	26	70.3
7	Effect of aromatase inhibitor (letrozole) with long agonist protocol on the results of ICSI/ET in females with minimal and mild endometriosis	Mohamed S. Abd Rabbo, Hassan A. Elmaghraby, Nagwa A. Mashali, Mohamed E. Abdel Moneim	2012	Not reported	Egypt	Endometriosis	Lower-middle-income	Not reported	60	Randomized controlled trial	Single tertiary centre (Elshatby Maternity University Hospital, Alexandria)	Open-label	Long GnRH agonist protocol vs same + letrozole 5 mg/day ×10 days	Clinical, embryologic, hormonal	Not reported	15	40.5
8	A two-arm parallel double-blind randomised controlled pilot trial of the efficacy of Omega-3 polyunsaturated fatty acids for the treatment of women with endometriosis-associated pain (PurFECT1)	Abokhrais I.M., Denison F.C., Whitaker L.H.R., Saunders P.T.K., Doust A., Williams L.J., Horne A.W.	2020	ISRCTN44202346	UK	Endometriosis	High-income	IKTF grant; MRC Centre Grant (MR/N022556/1); funders had no role	33	Double-blind randomised controlled pilot trial	Single tertiary hospital (Royal Infirmary of Edinburgh)	Double-blind; visually identical capsules	Omega-3 ethyl ester 1000 mg twice daily × 8 weeks vs identical olive oil capsules	Clinical (pain severity & interference, QoL, fatigue, mental health)	Not reported	28	75.7
9	The effect of vitamin D supplementation on insulin resistance, visceral fat and adiponectin in vitamin D deficient women with polycystic ovary syndrome: a randomized placebo-controlled trial	Maryam Seyyed Abootorabi, Parvin Ayremlou, Tahereh Behroozi-Lak, Sakineh Nourisaeidlou	2018	IRCT2016101030248N1	Iran	PCOS	Upper-middle-income	Urmia University of Medical Sciences	44	Randomized placebo-controlled clinical trial	Academic outpatient clinic (Urmia Motahhari Hospital)	Single-blind (investigator blinded; participants not blinded)	Vitamin D3 50,000 IU weekly × 8 weeks vs identical placebo; lifestyle unchanged	Biochemical (glucose, insulin, HOMA indices, adiponectin, vitamin D), body composition (visceral fat)	Not reported	21	56.8
10	Prospective, randomized study comparing highly purified urinary follicle-stimulating hormone (FSH) and recombinant FSH for IVF/ICSI in patients with polycystic ovary syndrome	Mohamed Aboulghar, Waleed Saber, Yahia Amin, Mona Aboulghar, Ragaa Mansour, Gamal Serour	2010	ISRCTN36808716	Egypt	PCOS	Lower-middle-income	Sponsored in part by IBSA Institut Biochimique SA	84	Prospective randomized controlled trial	Single large IVF center	Open-label	Highly purified urinary FSH (Fostimon) vs recombinant FSH (Gonal-F) within long GnRH agonist protocol; all patients received metformin	Reproductive (oocytes, embryos, pregnancy, OHSS)	Not reported	24	64.9
11	Clomiphene citrate alone, in combination with metformin or in combination with pioglitazone as first line therapy in induction of ovulation in infertile women with PCOS	Wessam Magdi Abuelghar, Osama Saleh Elkady, Ahmed Abdelmohsen Khamees	2013	Not reported	Egypt	PCOS	Lower-middle-income	None reported	106	Randomized controlled trial	Single tertiary infertility clinic	None (open-label)	CC 100 mg/day ×5 days vs CC+metformin 850 mg BID vs CC+pioglitazone 30 mg daily	Ovulation & biochemical pregnancy	Not reported	18	48.6
12	Intrauterine insemination versus timed intercourse with clomiphene citrate in polycystic ovary syndrome: a randomized controlled trial	Hatem Abu Hashim; Osama Ombar; Ibrahim Abd Elaal	2011	ACTRN12610000619044	Egypt	PCOS	Lower-middle-income	No specific funding	188	Parallel randomized controlled trial	University hospital and private practice	Outcome assessors blinded; participants not blinded	Clomiphene citrate ovulation induction + intrauterine insemination vs clomiphene citrate + timed vaginal intercourse (up to 3 cycles)	Reproductive, hormonal	Not reported	27	73
13	Randomized comparison of superovulation with letrozole vs. clomiphene citrate in an IUI program for women with recently surgically treated minimal to mild endometriosis	Hatem Abu Hashim; Mohamed El Rakhawy; Ibrahim Abd Elaal	2012	ClinicalTrials.gov NCT01334762	Egypt	Endometriosis	Lower-middle-income	No special funding	136	Parallel-group randomized controlled trial	University teaching hospital + private practice	Outcome assessors blinded (not participant-blinded)	Letrozole 5 mg/day ×5 days + IUI vs clomiphene citrate 100 mg/day ×5 days + IUI (up to 4 cycles)	Reproductive, hormonal	Not reported	28	75.7
14	Early initiation of gonadotropin-releasing hormone antagonist in polycystic ovarian syndrome patients undergoing assisted reproduction: randomized controlled trial	Mostafa I. Abuzeid; Mohamed Mitwally; Yasmine M. Abuzeid; Hammad A. Bokhari; Mohammad Ashraf; Michael P. Diamond	2012	ISRCTN69937179	USA	PCOS	High-income	Investigator-Initiated Studies Program, Merck Sharp & Dohme Corp.	140	Prospective randomized controlled trial (parallel)	Two academic IVF centers	Physicians blinded; nurses and patients not blinded	GnRH antagonist starting day 1 of stimulation vs starting day 5, both with rFSH + ICSI–ET	Reproductive, safety	Not reported	27	73
15	Anastrozole and levonorgrestrel-releasing intrauterine device in the treatment of endometriosis: a randomized clinical trial.	AciÃ©n P; Velasco I; AciÃ©n M	2021	EudraCT: 2008-005744-17	Spain	Endometriosis	High-income	Fondo de Investigaciones Sanitarias (FIS PI07/0417, PI10/01815)	31	Randomized clinical trial	single-centre University hospital	Not explicitly reported	Anastrozole 1 mg/day for 6 months + LNG-IUD (Mirena®) ± CS/TUGPA	Symptom scores (VAS), CA-125, recurrence, reoperations, fertility	not specified	14	37.8
16	Retinol-binding protein 4 in polycystic ovary syndrome—association with steroid hormones and response to pioglitazone treatment	Elmar Aigner; Nora Bachofner; Kerstin Klein; Christian De Geyter; Florian Hohla; Wolfgang Patsch; Christian Datz	2009	Not reported	Austria / Switzerland	PCOS	High-income	Land Salzburg; Spar Austria	40	Randomized, double-blind, placebo-controlled trial	Tertiary referral endocrine/gynecology center	Double-blind (participants and physicians)	Pioglitazone 30 mg/day vs placebo for 3 months	Metabolic, hormonal, ovulatory	Not reported	20	54.1
17	The Effectiveness of Herbal Mixture Supplements with and without Clomiphene Citrate in Comparison to Clomiphene Citrate on Serum Antioxidants and Glycemic Biomarkers in Women with Polycystic Ovary Syndrome Willing to be Pregnant: A Randomized Clinical Trial	Ainehchi N; Khaki A; Farshbaf-Khalili A; Hammadeh M; Ouladsahebmadarek E	2019	IRCT201509295563N7	Iran	PCOS	Upper-middle-income	Tabriz University of Medical Sciences; Iran National Science Foundation (INSF); Ministry of Health and Medical Education (Iran)	75	Randomized, single-blind, parallel-group clinical trial	Single-centre (Women’s Reproductive Health Research Center, Tabriz University of Medical Sciences)	Single blind (statistician blinded; participants and treating clinicians not blinded)	Group 1: CC 50–150 mg/day for 5 days/cycle × 3 cycles Group 2: Herbal mixture 700 mg/day (standardized ratio: spearmint:ginger:cinnamon:C. sinensis = 5:4:3:2) Group 3: CC regimen + herbal mixture	Clinical, biochemical, reproductive	not reported	18	48.6
18	Metformin versus insulin treatment in gestational diabetes in pregnancy in a developing country: a randomized control trial	Jahanara Ainuddin, Nasim Karim, Anjum Ara Hasan, Sanower Ali Naqvi	2015	NCT018557631	Pakistan	GDM	Lower-middle-income	Self-funded + hospital support	150	Prospective randomized open-label clinical trial	Two public hospitals + private clinic (urban)	Not blinded	Metformin (500–2500 mg/day) vs insulin; supplemental insulin added when needed	Maternal & neonatal outcomes	Not reported	21	56.8
19	Resveratrol ameliorates mitochondrial biogenesis and reproductive outcomes in women with polycystic ovary syndrome undergoing assisted reproduction: a randomized, triple-blind, placebo-controlled clinical trial	Negar Ajabi Ardehjani, Marzieh Agha-Hosseini, Maryam Shabani Nashtaei, Mahshad Khodarahmian, Maryam Shabani, Masoome Jabarpour, Farzane Fereidouni, Tayebeh Rastegar, Fardin Amidi	2024	IRCT20221106056417N1	Iran	PCOS	Upper-middle-income	Tehran University of Medical Sciences (Grant 1402-1-371-64482)	56	Triple-blind RCT (participants, researchers, statisticians)	Single fertility clinic (Omid Fertility Clinic, Tehran)	Triple-blind: participants, clinicians, statisticians	800 mg/day resveratrol for 60 days vs placebo	Biological (OS markers, mitochondrial measures), clinical (ART outcomes)	Not reported	29	78.4
20	Androgens and hirsutism score of overweight women with polycystic ovary syndrome improved after vitamin D treatment: A randomized placebo controlled clinical trial	Nahla Al-Bayyari, Hayder Al-Domi, Faheem Zayed, Ra’ed Hailat, Arieanna Eaton	2021	NCT02328404	Jordan	PCOS	Upper-middle-income	Al-Hayat Pharmaceutical Company; University of Jordan	60	Randomized controlled trial (parallel)	Single-centre (King Abdullah University Hospital, Jordan)	Double-blind (participants, researchers, clinicians)	Vitamin D3 50,000 IU/week for 12 weeks vs placebo	Endocrine, metabolic, reproductive, ultrasound-based	Not reported	28	75.7
21	Immediate delivery or expectant management in gestational diabetes at term: the GINEXMAL RCT	S. Alberico, A. Erenbourg, M. Hod, Y. Yogev, E. Hadar, F. Neri, L. Ronfani, G. Maso & GINEXMAL Group	2017	NCT01058772	Italy, Slovenia, Israel	GDM	High-income	Institute for Maternal & Child Health–IRCCS Burlo Garofolo (human + financial resources)	425	Multicentre open-label RCT	8 teaching hospitals	Open-label (impossible to blind participants/clinicians); outcome assessors not explicitly blinded	Induction of labour at 38–39 weeks vs expectant management with twice-weekly fetal surveillance until 41 weeks	Clinical (maternal + neonatal), obstetric	Not reported	30	81.1
22	Effect of L-carnitine supplementation on liver fat content and cardiometabolic indices in overweight/obese women with polycystic ovary syndrome: A randomized controlled trial	Abbas Ali Sangouni, Bahareh Sasanfar, Akram Ghadiri-Anari, Mahdieh Hosseinzadeh	2021	IRCT20191016045131N1	Iran	PCOS	Upper-middle-income	Shahid Sadoughi University of Medical Sciences (student thesis support)	62	Randomized controlled trial (double-blind)	Single-centre (Diabetes Research Center, Yazd)	Double-blind (participants + investigators)	L-carnitine 1000 mg/day vs placebo for 12 weeks	Cardiometabolic, anthropometric	Not reported	26	70.3
23	Prevalence of anxiety and depression among women with PCOS living in war vs non-war zone countries: A randomized controlled trial assessing a pharmacist intervention	Kinda T. Alkoudsi, Iman A. Basheti	2020	Not registered	Syria & Jordan	PCOS	Mixed Income	Applied Science Private University (full financial support)	118	Randomized controlled trial	Multi-centre (community pharmacies in Damascus & Amman)	No blinding (open-label)	Active group: pharmacist-delivered lifestyle + stress-reduction + diet + breathing + PCOS education; Control: standard pharmacy counseling	Psychological (BAI, BDI)	Not reported	23	62.2
24	Effectiveness of carbohydrate counting and DASH dietary intervention on managing gestational diabetes mellitus among pregnant women who used metformin: A randomized controlled clinical trial	Sabika Allehdan; Asma Basha; Dana Hyassat; Mohammed Nabhan; Husam Qasrawi; Reema Tayyem	2022	NCT03244579	Jordan	GDM	Upper-middle-income	Deanship of Academic Research, University of Jordan (Grant 2017-2016/165)	75	Parallel 3-arm RCT	Two tertiary hospitals (Jordan University Hospital; Al-Bashir Hospital)	Participants and investigators unblinded (dietary study); outcome assessors blinded	(1) Carbohydrate counting diet; (2) Carbohydrate counting + DASH; (3) Standard pregnancy diet	Clinical (glycemic control, maternal, neonatal)	Not reported	25	67.6
25	Randomized Controlled Trial Evaluating Response to Metformin Versus Standard Therapy in the Treatment of Adolescents with Polycystic Ovary Syndrome	Holley F. Allen, Cristina Mazzoni, Rubina A. Heptulla, Mary A. Murray, Nancy Miller, Laura Koenigs, Edward O. Reiter	2005	Not reported	USA	PCOS	High-income	Not reported	36	Randomized controlled trial, parallel-group	Multicentre: pediatric endocrine & adolescent clinics (USA)	Single-blind (participants & outcome assessors); treating clinicians unblinded (page 3)	Metformin 500 mg BID → 1 g BID vs OCP (ethinyl estradiol/norgestimate 35 µg/0.25 mg) for 6 months (page 3)	Clinical endocrine, metabolic, menstrual	Not reported	19	51.4
26	Effects of simvastatin in prevention of pain recurrences after surgery for endometriosis	Almassinokiani F., Mehdizadeh A., Sariri E., Rezaei M., Almasi A., Akbari H., Pazouki A., Solaymani-Dodaran M., Asadollah S., Amirkhani J., Chaichian S., Vahdat M., Moosavi A., Ashouri M., Tamannaei Z.	2013	Not registered	Iran	Endometriosis	Upper-middle-income	Minimally Invasive Surgery Research Center, Rasool Akram Hospital, Tehran University of Medical Sciences	60	Prospective randomized controlled trial	Single tertiary gynecologic surgery center	Double-blind claimed, but method indicates not blinded	Simvastatin 20 mg/day × 4 months vs GnRH agonist (Decapeptyl 3.75 mg IM every 28 days × 4 doses)	Clinical (pain severity)	Not used	13	35.1
27	Effects of Vitamin D on Endometriosis-Related Pain: A Double-Blind Clinical Trial	Fariba Almassinokiani, Sepideh Khodaverdi, Masoud Solaymani-Dodaran, Peyman Akbari, Abdolreza Pazouki	2016	IRCT2013021912151N3	Iran	Endometriosis	Upper-middle-income	Departmental sources; Iran University of Medical Sciences (Grant 93-02-140-24388)	39	Double-blind randomized controlled trial	Single tertiary university hospital	Double-blind (participants and investigators)	Vitamin D3 50,000 IU weekly × 12 wks vs placebo	Clinical (VAS pelvic pain; dysmenorrhea)	Not reported	17	45.9
28	Effects of high-intensity interval training and strength training on metabolic, cardiovascular and hormonal outcomes in women with polycystic ovary syndrome: a pilot study	Ida Almenning; Astrid Rieber-Mohn; Kari M. Lundgren; Tone S. Løvvik; Kirsti K. Garnæs; Trine Moholdt	2015	ClinicalTrials.gov NCT01919281	Norway	PCOS	High-income	Norwegian Fund for Research in Sports Medicine	31	Three-arm parallel randomized controlled trial (pilot)	University hospital & exercise physiology research centre	Exercise unblinded; FMD assessor blinded	HIIT (3 sessions/week; 4×4-min + 10×1-min intervals) vs strength training (75% 1RM) vs usual-activity control for 10 weeks	Metabolic, cardiovascular, hormonal	Not reported	28	75.7
29	Unilateral laparoscopic ovarian diathermy in infertile women with clomiphene citrate–resistant polycystic ovary syndrome	Ebtisam Al-Mizyen; J. Gedis Grudzinskas	2007	Not reported	United Kingdom	PCOS	High-income	Not reported	20	Prospective randomized controlled trial	University hospital gynecology & reproductive medicine units	Not blinded (surgical intervention)	Unilateral laparoscopic ovarian diathermy vs bilateral laparoscopic ovarian diathermy	Reproductive, hormonal	Not reported	16	43.2
30	Comparing efficacy and safety of stair step protocols for clomiphene citrate and letrozole in ovulation induction for women with polycystic ovary syndrome (PCOS): a randomized controlled clinical trial	Saba Al-Thuwaynee, Asmaa Abdul Jaleel Swadi	2023	Not reported	Iraq	PCOS	Upper-middle-income	Not reported	100	Randomized controlled clinical trial	Single-center (Maternity & Children Teaching Hospital, Adiwaniyah)	Open-label (no masking)	Stair-step clomiphene citrate vs stair-step letrozole	Clinical (ovulation, pregnancy), safety, metabolic	Not reported	20	54.1
31	Effect of 12-month treatment with metformin and/or oral contraceptives on health-related quality of life in polycystic ovary syndrome	Altinok M.L., Ravn P., Andersen M., Glintborg D.	2018	NCT004515 (patients), NCT01995773 (controls)	Denmark	PCOS	High-income	Multiple foundations (Jacob Madsen, Olga Madsen, AP Møller, Novo Nordisk Foundation, etc.); OCP & metformin tablets sponsored by Sandoz (not involved in design)	90	Randomized controlled trial	University endocrine & gynecology departments	Open-label	12-month treatment: (1) Metformin 2000 mg/day; (2) OCP (desogestrel 150 µg + EE 30 µg); (3) Combination therapy	Clinical (HRQoL, hirsutism, weight), physiological (hormones), functional (SF-36)	Not reported	22	59.5
32	Randomized controlled trial comparing laparoscopic ovarian diathermy with clomiphene citrate as a first-line method of ovulation induction in women with polycystic ovary syndrome	S.A. Amer, T.C. Li, M. Metwally, M. Emarh, W.L. Ledger	2009	NCT00220545	UK	PCOS	High-income	University of Sheffield (Devolved funds)	72	Randomized controlled trial	Single reproductive medicine centre	Open-label	LOD surgery vs CC 50–150 mg (escalating)	Reproductive (ovulation, pregnancy, miscarriage), surgical safety	No	27	73
33	Double-blind randomized controlled trial of letrozole versus clomiphene citrate in subfertile women with polycystic ovarian syndrome	S.A. Amer, J. Smith, A. Mahran, P. Fox, A. Fakis	2017	NCT00478504	UK	PCOS	High-income	Derby Hospitals NHS Foundation Trust; University of Nottingham	159	Double-blind randomized controlled trial with crossover	Single fertility unit (Derby Teaching Hospitals, UK)	Double-blind (participants, investigators, nurses, sonographers, statisticians)	Letrozole 2.5 mg daily ×5 days vs CC 50 mg daily ×5 days, dose-escalated if needed, for up to 6 ovulatory cycles; crossover allowed	Clinical reproductive outcomes	Not reported	29	78.4
34	Efficacy of Salvia officinalis extract on the prevention of insulin resistance in euglycemic patients with polycystic ovary syndrome: A double-blinded placebo-controlled clinical trial	Leila Amini, Faraz Mojab, Shayesteh Jahanfar, Mahdi Sepidarkish, Zahra Raoofi, Arezoo Maleki-Hajiagha	2020	IRCT201504146917N2 (2015-10-03)	Iran	PCOS	Upper-middle-income	Iran University of Medical Sciences (Grant 94-03-28-26521)	70	Randomized, triple-blinded, placebo-controlled clinical trial	Multi-clinic within a single university system (gynecology/infertility/endocrinology clinics)	Triple-blind	Salvia officinalis extract 330 mg daily × 8 weeks vs placebo	Metabolic, anthropometric	Not reported	24	64.9
35	The Effect of Combined Vitamin C and Vitamin E Supplementation on Oxidative Stress Markers in Women with Endometriosis: A Randomized, Triple-Blind Placebo-Controlled Clinical Trial.	Amini L; Chekini R; Nateghi MR; Haghani H; Jamialahmadi T; Sathyapalan T; Sahebkar A	2021	IRCT201106296917N1	Iran	Endometriosis	Upper-middle-income	not specified	60	Randomized, triple-blind, placebo-controlled clinical trial	Single hospital centre (Sarem Hospital, Tehran)	Triple-blind (participants, researchers, statistician)	Vitamin C 1000 mg/day + Vitamin E 800 IU/day vs placebo	Primary: oxidative stress markers (MDA, ROS, TAC); Secondary: VAS scores for pelvic pain, dysmenorrhea, dyspareunia	not reported	15	40.5
36	Effects of oral contraceptives on the quality of life of women with polycystic ovary syndrome: a crossover randomized controlled trial	Mina Amiri, Fatemeh Nahidi, Razieh Bidhendi Yarandi, Davood Khalili, Maryam Tohidi, Fahimeh Ramezani Tehrani	2020	IRCT201702071281N2	Iran	PCOS	Upper-middle-income	Shahid Beheshti University of Medical Sciences (research funding)	200	6-arm crossover RCT with two 6-month treatment periods per participant	Single specialist endocrine outpatient clinic (RIES, Shahid Beheshti Univ.)	Clinical examiner and data analyst blinded; participants not explicitly blinded to pill type	All women received LNG (EE30µg/LNG0.15mg) in one period; the other period included DSG, CPA, or DRSP formulations	Patient-reported outcomes, biochemical, and clinical outcomes	Not reported	18	48.6
37	Continuous glucose monitoring in the management of gestational diabetes in Switzerland (DipGluMo): an open-label, single-centre, randomised controlled trial	Sofia Amylidi-Mohr, Giulia Zennaro, Sophie Schneider, Luigi Raio, Beatrice Mosimann, Daniel Surbek	2025	NCT05037526	Switzerland	GDM	High-income	University of Bern; Swiss Diabetes Foundation; Dexcom devices provided free	302	Open-label RCT	Single university hospital	None (open-label; but blinded CGM device for control comparisons)	rtCGM throughout pregnancy vs SMBG + blinded CGM at 3 timepoints	Perinatal and neonatal clinical outcomes; glycaemic metrics	No	26	70.3
38	Effectiveness of dual combination therapy of acarbose plus metformin and acarbose plus myo-inositol in ameliorating metabolic and endocrinologic complications of PCOS – A randomized controlled trial	Marina Andavar, Raju Kamaraj, Thangavel M. Vijayakumar, Anuradha Murugesan	2024	CTRI/2022/04/041877	India	PCOS	Upper-middle-income	No external funding reported	168	Parallel multi-arm RCT	Single tertiary teaching hospital (SRM Medical College Hospital)	Open-label; assessors not blinded	Metformin alone vs acarbose+metformin vs acarbose+myo-inositol for 24 weeks	Hormonal & metabolic clinical outcomes	Not used	28	75.7
39	A comparative study of metabolic and hormonal effects of myoinositol vs. metformin in women with polycystic ovary syndrome: a randomised controlled trial	Riju Angik, Shubhada S. Jajoo, C. Hariharan, Amogh Chimote	2015	Not registered	India	PCOS	Lower-middle-income	None stated	100	Randomized controlled trial	Tertiary hospital (Acharya Vinoba Bhave Rural Hospital)	Not blinded (open-label)	Myoinositol 1 g BID × 6 months vs Metformin 500 mg BID × 6 months	Clinical, metabolic, hormonal, fertility	Not reported	17	45.9
40	Myo-inositol supplementation and onset of gestational diabetes mellitus in pregnant women with a family history of type 2 diabetes: a prospective, randomized, placebo-controlled study	Rosario D’Anna, Angela Scilipoti, Domenico Giordano, Carmela Caruso, Maria Letizia Cannata, Maria Lieta Interdonato, Francesco Corrado, Antonino Di Benedetto	2013	ClinicalTrials.gov NCT01047982	Italy	GDM	High-income	Not reported (institutional funding, University of Messina)	220	Prospective, open-label, randomized placebo-controlled trial	Single-centre (University of Messina, Department of Obstetrics and Gynecology)	Open-label (participants and clinicians unblinded)	Myo-inositol 2 g + 200 mg folic acid twice daily vs placebo (200 mg folic acid twice daily)	Clinical and metabolic	Not reported	21	56.8
41	Effect of physical activity promotion program on insulin resistance and glycemic control in gestational diabetes mellitus: a randomized controlled trial	Savni Apte, Preetha Ramachandra, Shyamala Guruvare, Shashikala K Bhat, G Arun Maiya	2025	CTRI/2022/07/043832	India	GDM	Lower-middle-income	No external funding reported	120	Parallel-group RCT	Single centre (Kasturba Hospital, Manipal)	Not blinded	8-week PAP program (education + booklet + supervised sessions + strength, aerobic & pregnancy-specific exercises) vs usual prenatal care	Metabolic outcomes (IR, FBG, PPBG), behavioural (PA level)	No	24	64.9
42	Effects of probiotic supplementation on hormonal and clinical outcomes of women diagnosed with polycystic ovary syndrome: A double-blind, randomized, placebo-controlled clinical trial	Arman Arab; Mojgan Hossein-Boroujerdi; Ashraf Moini; Mahdi Sepidarkish; Nooshin Shirzad; Elham Karimi	2022	IRCT2014110515536N2	Iran	PCOS	Upper-middle-income	Tehran University of Medical Sciences	99	Double-blind RCT	Single referral gynecology/obstetrics hospital	Participants, researchers, lab staff blinded	Probiotic capsule daily for 12 weeks (7 bacterial strains + inulin) vs placebo	Clinical (hormonal & androgenic signs)	Not reported	23	62.2
43	Supplemented tissue culture medium 199 is a better medium for in vitro maturation of oocytes from women with polycystic ovary syndrome women than human tubal fluid.	de Araujo CH; Nogueira D; de Araujo MC; Martins Wde P; Ferriani RA; dos Reis RM	2009	not reported	Brazil	PCOS	Upper-middle-income	not reported	13	Randomized Controlled Trial (randomization of oocytes to culture media) Single-centre, laboratory-based RCT	Single fertility/IVM laboratory	not specified	TCM-199 medium (nutrient-rich, 1.0 g/L glucose) HTF medium (nutrient-poor, 0.5 g/L glucose) Both supplemented with 10% Synthetic Serum Substitute (SSS).	Laboratory/biological outcomes (maturation, fertilization, embryo development)	not reported	9	24.3
44	Combined lifestyle and herbal medicine in overweight women with polycystic ovary syndrome (PCOS): a randomized controlled trial	Susan Arentz; Caroline A. Smith; Jason Abbott; Paul Fahey; Birinder S. Cheema; Alan Bensoussan	2017	ANZCTR 12612000122853	Australia	PCOS	High-income	Western Sydney University; Australian Postgraduate Award; MediHerb (unconditional tablet provision)	122	Pragmatic parallel-group randomized controlled trial	Community-based (homes, gyms, clinics)	Participants unblinded; analysts blinded	Lifestyle intervention (diet + ≥150 min/wk exercise) plus herbal tablets (Cinnamomum, Glycyrrhiza, Paeonia, Hypericum, Tribulus) vs lifestyle alone for 3 months	Reproductive, metabolic, psychological, QoL, safety	Not reported	28	75.7
45	Metabolic and Hormonal Changes Induced by Pioglitazone in Polycystic Ovary Syndrome: A Randomized, Placebo-Controlled Clinical Trial	Vanita R. Aroda, Theodore P. Ciaraldi, Paivi Burke, Sunder Mudaliar, Paul Clopton, Susan Phillips, R. Jeffrey Chang, Robert R. Henry	2009	Not registered (pre-2010)	USA	PCOS	High-income	American Diabetes Association; Veterans Affairs Medical Research Service; Takeda Pharmaceuticals; NIH (GCRC grant)	28	Randomized, placebo-controlled clinical trial	Academic metabolic/endocrine research centers (VA San Diego + UCSD GCRC)	Single-blind (assessors blinded)	Pioglitazone 45 mg daily × 6 months vs placebo	Metabolic (glucose disposal rate, OGTT, adiponectin), hormonal (17-OHP response, A4, testosterone), clinical (FG score)	Not reported	15	40.5
46	Effect of a Multimodal Supervised Therapeutic Exercise Program on Quality of Life, Pain, and Lumbopelvic Impairments in Women With Endometriosis Unresponsive to Conventional Therapy: A Randomized Controlled Trial	Francisco Artacho-Cordón; María del Mar Salinas-Asensio; Noelia Galiano-Castillo; Olga Ocón-Hernández; Francisco M. Peinado; Antonio Mundo-López; Mario Lozano-Lozano; Francisco Alvarez-Salvago; Manuel Arroyo-Morales; Carolina Fernández-Lao; Irene Cantarero-Villanueva	2023	NCT03979183	Spain	Endometriosis	High-income	Health Institute Carlos III (FEDER funds PI17/01743); University of Granada research funds	31	Parallel-group RCT	Two public university hospitals	Assessor, statistician, and data manager blinded; participants/therapists unblinded	9-week multimodal supervised therapeutic exercise ("Physio-EndEA") vs usual gynecologic care + generic PA advice	Clinical (QoL, pain, strength, sensitization)	Not reported	27	73
47	Endocrine and clinical effects of myo-inositol administration in polycystic ovary syndrome. A randomized study	P. G. Artini, O. M. Di Berardino, F. Papini, A. D. Genazzani, G. Simi, M. Ruggiero, V. Cela	2013	Not reported	Italy	PCOS	High-income	Not reported (authors declare no conflict of interest)	50	Randomized controlled clinical study (single-centre)	University IVF centre (University of Pisa; ART clinic)	Not described as blinded (open-label)	MYO 2 g/day + folic acid 200 µg/day for 12 weeks vs folic acid 400 µg/day (control); then standard IVF stimulation	Clinical (pregnancy, delivery, OHSS) and biochemical (LH, PRL, insulin, HOMA, glucose/insulin ratio) and reproductive (oocyte/embryo quality)	No	21	56.8
48	Effects of DASH diet on lipid profiles and biomarkers of oxidative stress in overweight and obese women with polycystic ovary syndrome: A randomized clinical trial	Zatollah Asemi, Mansooreh Samimi, Zohreh Tabassi, Hossein Shakeri, Sima-Sadat Sabihi, Ahmad Esmaillzadeh	2014	Not reported	Iran	PCOS	Upper-middle-income	Vice-chancellor for research, Kashan University of Medical Sciences (grant 9213)	54	Randomized controlled clinical trial	Gynecology clinics of Kashan University Medical Sciences	Single-blind (all staff & participants except dietitian blinded)	DASH diet (high fruits/veg, low sodium, whole grains) vs calorie-matched control diet for 8 weeks	Metabolic and biochemical outcomes	Not reported	25	67.6
49	Elevation of the adiponectin/leptin ratio in women with gestational diabetes mellitus after supplementation with alpha-lipoic acid	Hadise Aslfalah, Mehri Jamilian, Ali Khosrowbeygi	2019	IRCT2017091225949N5	Iran	GDM	Upper-middle-income	Research Council of Arak University of Medical Sciences (Grant 2846)	60	Randomized double-blind placebo-controlled clinical trial	Single-centre (Arak University of Medical Sciences)	Double-blind (participants and statistician)	100 mg alpha-lipoic acid capsule daily for 8 weeks	Metabolic / biochemical outcomes	Not reported	23	62.2
50	A Mediterranean diet with additional extra virgin olive oil and pistachios reduces the incidence of gestational diabetes mellitus (GDM): The St. Carlos GDM prevention study	Carla Assaf-Balut, Nuria García de la Torre, Alejandra Durán, Manuel Fuentes, Elena Bordiú, Laura del Valle, Cristina Familiar, Ana Ortolá, Inés Jiménez, Miguel A. Herraiz, Nuria Izquierdo, Noelia Pérez, María J. Torrejón, María I. Ortega, Francisco J. Illana, Isabelle Runkle, María P. de Miguel, Carmen Montañez, Ana Barabash, Martín Cuesta, Miguel A. Rubio, Alfonso L. Calle-Pascual	2017	ISRCTN84389045	Spain	GDM	High-income	Fundación para Estudios Endocrinometabólicos; Instituto de Salud Carlos III (PI14/01563); FEDER Funds	1000	Parallel, two-arm, open-label, randomised controlled trial	Single-centre (Hospital Clínico San Carlos, Madrid)	Open-label (participants and clinicians aware; analysts blinded)	Mediterranean diet (EVOO ≥40 mL/day, pistachios 25–30 g/day) vs standard diet (fat-restricted)	Clinical and metabolic	Not reported	31	83.8
51	Comparison of letrozole and clomiphene citrate in women with polycystic ovaries undergoing ovarian stimulation.	Atay V; Cam C; Muhcu M; Cam M; Karateke A	2006	NR	Turkey	PCOS	Upper-middle-income	NR	106	Parallel-group randomized controlled trial (described as a “prospective, randomized study” comparing two groups: CC vs letrozole, with outcomes assessed after one stimulation cycle)	NR	NR	CC arm: 100 mg clomiphene citrate daily for 5 days, beginning on day 3 of the menstrual cycle. Letrozole arm: 2.5 mg letrozole daily for 5 days, beginning on day 3. All patients had transvaginal ultrasound monitoring from day 10 onward. When at least one follicle with mean diameter ≥18 mm was observed, 10 000 IU hCG was given subcutaneously to trigger ovulation.	Reproductive outcomes: ovulation (yes/no) and clinical pregnancy (confirmed by ultrasound). Clinical/physiological outcomes: number of mature follicles ≥18 mm, endometrial thickness (mm), day of hCG administration. Safety/adverse events: twin pregnancy reported (one case in CC arm).	NR	10	27
52	Efficacy of combined metformin-clomiphene citrate in comparison with clomiphene citrate alone in infertile women with polycystic ovarian syndrome (PCOS).	Ayaz A; Alwan Y; Farooq MU	2013	NR	Saudi Arabia	PCOS	High-income	NR	42	Randomized controlled trial, parallel-group, open-label.	Single centre	NR	Intervention group: Metformin 500 mg three times daily continuously for up to 6 months + clomiphene citrate (50 mg day 2–6, escalated to 150 mg by cycle 3 and maintained). Control group: Clomiphene citrate alone using identical dose escalation protocol.	Reproductive outcomes: menstrual regularity, ovulation (ultrasound follicle tracking), conception (urine pregnancy test and ultrasound).	NR	14	37.8
53	Metformin effects on clomiphene-induced ovulation in the polycystic ovary syndrome	Ben Ayed B., Dammak dit Mlik S., Ben Arab H., Trabelssi H., Chahtour H., Mathlouthi N., Dhuib M., Kassis M., Saiidane D., Trabelssi K., Guermazi M.	2009	Not registered	Tunisia	PCOS	Lower-middle-income	Not reported	32	Prospective randomized controlled trial	Single-centre public university hospital (CHU Hedi Chaker–Sfax)	Open-label (no blinding)	Clomiphene citrate 100 mg/day (cycle days 3–7) + either metformin 850 mg BID or placebo for entire cycle (up to 3 cycles)	Clinical (ovulation presence), hormonal (E2), ultrasound follicle metrics	Not reported	13	35.1
54	Effects of Dietary Approaches to Stop Hypertension diet on androgens, antioxidant status and body composition in overweight and obese women with polycystic ovary syndrome: a randomised controlled trial	M. Azadi-Yazdi, M. Karimi-Zarchi, A. Salehi-Abargouei, H. Fallahzadeh, A. Nadjarzadeh	2017	IRCT2014121610826N16	Iran	PCOS	Upper-middle-income	Shahid Sadoughi University of Medical Sciences	60	Parallel RCT (12-week intervention)	Single gynecology outpatient clinic	Single-blind (participants “unaware of their diets”)	DASH diet vs energy-matched control diet for 12 weeks	Biochemical (androgens, antioxidant capacity), anthropometric	Not reported	22	59.5
55	Probiotic effects on sexual function in women with polycystic ovary syndrome: a double-blinded randomized controlled trial	Maryam Azizi-Kutenaee, Solmaz Heidari, Seyed-Abdolvahab Taghavi, Fatemeh Bazarganipour	2022	IRCT20160524028038N8	Iran	PCOS	Upper-middle-income	Research Deputy of Hormozgan University of Medical Sciences	40	Double-blind RCT	Single infertility centre (Hormozgan University of Medical Sciences)	Double-blind (participants + physicians)	Group A: Lactofem probiotic daily × 2 months + letrozole cycle days 3–7 in month 2; Group B: letrozole alone	Clinical, psychological, reproductive	Not used	20	54.1
56	A randomized, double-blind study on efficacy and safety of sepranolone in premenstrual dysphoric disorder.	BÃ¤ckstrÃ¶m T; Ekberg K; Hirschberg AL; Bixo M; Epperson CN; Briggs P; Panay N; O'Brien S	2021	not stated	Europe	PMDD	High-income	Asarina Pharma, Copenhagen, Denmark	206	parallel double-blind, randomized controlled trial	Multicenter	Double-blind	Sepranolone 10 mg and 16 mg subcutaneous injections vs placebo	Symptom scores (DRSP Sum21), distress, impairment, hormonal levels, safety outcomes	DRSP rating scale used (FDA approved)	29	78.4
57	Efficacy of Dry Cupping versus Counselling with Mindfulness-Based Cognitive Therapy Approach on Fertility Quality of Life and Conception Success in Infertile Women due to PCOS: A Pilot RCT	Baghbani F., Alidousti K., Parvizi M.M., Ahmadi A., Moradi Alamdarloo S., Jaladat A.M., Atarzadeh F.	2024	IRCT201706110334452N13	Iran	PCOS	Upper-middle-income	Kerman University of Medical Sciences (grant 99001157) & Shiraz University of Medical Sciences	19	Pilot randomized clinical trial (two-arm)	Health centres affiliated with Shiraz University of Medical Sciences	Participants and researchers unblinded; outcomes assessor & statistician blinded	Dry cupping twice weekly ×2 months vs virtual MBCT (eight 90-min sessions with homework)	Clinical (QoL, conception)	None reported	16	43.2
58	Effect of stress-management–based self-care counseling on glycemic control in women with gestational diabetes mellitus: a randomized controlled trial	Atefeh Bagheri-Tirtashi, Fatemeh Nasiri-Amiri, Hajar Adib-Rad, Hossein-Ali Nikbakht, Mahbobeh Faramarzi, Ezzat Kiani	2025	IRCT20200122046228N5 (retrospectively registered 2024)	Iran	GDM	Upper-middle-income	Babol University of Medical Sciences (Grant 724134351)	75	Parallel RCT	Single-centre (Shohada Hospital, Behshahr)	Assessor-blinded; participants unblinded	8 weekly virtual stress-management self-care sessions (videos, audio, WhatsApp support) vs antenatal usual care	Clinical & psychosocial	Not used	26	70.3
59	Effects of resveratrol on VEGF & HIF1 gene expression in granulosa cells in the angiogenesis pathway and laboratory parameters of PCOS: a triple-blind randomized clinical trial	Mojdeh Bahramrezaie, Fardin Amidi, Ashraf Aleyasin, AboTaleb Saremi, Marzieh Aghahoseini, Samaneh Brenjian, Mahshad Khodarahmian, Arash Pooladi	2019	IRCT2016030126860N1	Iran	PCOS	Upper-middle-income	Tehran University of Medical Sciences (Grant 94-02-30-29469)	62	Triple-blind RCT	University fertility centers (Omid IVF Centre + Tehran University)	Triple-blind	Resveratrol 800 mg/day × 40 days vs identical placebo; both with standard ICSI antagonist stimulation protocol	Molecular (VEGF, HIF1 gene expression), hormonal, embryologic and clinical pregnancy	Not reported	25	67.6
60	Premixed insulin aspart 30 (BIAsp 30) versus premixed human insulin 30 (BHI 30) in gestational diabetes mellitus: a randomized open-label controlled study	Vijayam Balaji, Madhuri S. Balaji, Cynthia Alexander, Ashalata Srinivasan, Sheela R. Suganthi, Arthi Thiyagarajah, Veerasamy Seshiah	2012	Not registered	India	GDM	Lower-middle-income	Not reported	323	Parallel, open-label RCT	Single-centre (Diabetes Care & Research Institute, Chennai)	Open-label	BIAsp 30 vs BHI 30 premixed insulin, starting 6U, titrated twice daily	Clinical & metabolic	Not used	18	48.6
61	Comparison of Simvastatin and Metformin in Treatment of Polycystic Ovary Syndrome: Prospective Randomized Trial	Beata Banaszewska, Leszek Pawelczyk, Robert Z. Spaczynski, Antoni J. Duleba	2009	NCT00396513	Poland & USA (collaboration)	PCOS	High-income	Polish State Committee for Scientific Research (KBN); NICHD	136	3-arm parallel RCT	Academic medical center	Open-label (pills identifiable)	Simvastatin 20 mg/day vs Metformin 850 mg BID vs combination for 3 months	Clinical (androgen levels, hirsutism), metabolic (lipids, insulin sensitivity), inflammatory markers	Not used	22	59.5
62	Effects of Simvastatin and Metformin on Polycystic Ovary Syndrome after Six Months of Treatment	Beata Banaszewska, Leszek Pawelczyk, Robert Z. Spaczynski, Antoni J. Duleba	2011	NCT00396513	Poland & USA	PCOS	High-income	Polish State Committee for Scientific Research; NICHD	139	Three-arm RCT	University medical centers	Open-label (pills identifiable); outcome assessors not blinded	Simvastatin 20 mg/day vs Metformin 850 mg BID vs Simvastatin+Metformin	Clinical (menstrual), hormonal, metabolic, inflammatory	No	23	62.2
63	Letrozole versus clomiphene citrate for ovulation induction in anovulatory women with polycystic ovarian syndrome: A randomized controlled trial	Shavina Bansal, Manu Goyal, Charu Sharma, Shashank Shekhar	2021	CTRI/2018/04/013343	India	PCOS	Lower-middle-income	None reported	90	Parallel RCT	Single tertiary teaching hospital (AIIMS Jodhpur)	Assessor-blinded (ultrasound & statistician); participants/providers unblinded	Letrozole 2.5→7.5 mg vs clomiphene 50→150 mg for up to 3 cycles; timed intercourse	Clinical (pregnancy), ultrasound (follicles, ET), hormonal	None reported	26	70.3
64	Resistance exercise and glycemic control in women with gestational diabetes mellitus	Marcelo C. de Barros, Marco A. B. Lopes, Rossana P. V. Francisco, Andreia D. Sapienza, Marcelo Zugaib	2010	Not reported	Brazil	GDM	Upper-middle-income	CAPES (Brazilian postgraduate fellowship)	64	Randomized controlled trial	Single-centre (University Hospital, University of São Paulo)	Clinicians blinded (obstetricians unaware of group); participants not blinded	Resistance-exercise program (elastic band), 3 days/week, 30–40 min, progressive circuits	Metabolic outcomes (glycaemic control, insulin need); maternal & neonatal outcomes	Not reported	20	54.1
65	The World Health Organization (WHO) versus The International Association of Diabetes and Pregnancy Study Group (IADPSG) diagnostic criteria of gestational diabetes mellitus (GDM) and their associated maternal and neonatal outcomes	Nurul Iftida Basri, Zaleha Abdullah Mahdy, Shuhaila Ahmad, Abdul Kadir Abdul Karim, Lim Pei Shan, Mohd Rizal Abdul Manaf, Nor Azlin Mohd Ismail	2018	Not registered	Malaysia	GDM	Upper-middle-income	No external funding declared	520	Randomised controlled trial	Single-centre (Universiti Kebangsaan Malaysia Medical Centre, Kuala Lumpur)	Open-label	Comparison of diagnostic criteria (WHO vs IADPSG) applied to 75g OGTT; management standardised	Clinical (maternal and neonatal outcomes)	Not reported	18	48.6
66	Dietary Blueberry and Soluble Fiber Supplementation Reduces Risk of Gestational Diabetes in Women with Obesity in a Randomized Controlled Trial	Basu A, Feng D, Planinic P, Ebersole JL, Lyons TJ, Alexander JM	2021	NCT03467503	USA	GDM	High-income	NIH NIGMS GM103440; UNLV Dean’s Faculty Development Award	34	Randomized controlled trial	Single centre (UNLV prenatal clinic)	Not fully blinded (participants aware); analysts blinded	280 g blueberries/day + 12 g soluble fiber vs standard prenatal care	Glycemic control, weight gain, inflammation	Not stated	21	56.8
67	Assessing the benefits of rosiglitazone in women with polycystic ovary syndrome through its effects on insulin-like growth factor 1, insulin-like growth factor–binding protein-3 and insulin resistance: a pilot study	José Gomes Batista; José Maria Soares-Jr; Carla Cristina Maganhin; Ricardo Santos Simões; Geraldez Tomaz; Edmund Chada Baracat	2012	PFU-IRB #405/2004	Brazil	PCOS	Upper-middle-income	Federal University of São Paulo; Federal University of Paraíba; CAPES	60	Randomized placebo-controlled pilot trial	University gynecology outpatient clinics	Double-blind (capsules labeled ZX/XZ)	Rosiglitazone 4 mg BID vs placebo for 12 weeks	Hormonal, metabolic	Not reported	14	37.8
68	Polycystic ovary syndrome and cardiovascular risk in young patients treated with drospirenone-ethinylestradiol or contraceptive vaginal ring. A prospective, randomized, pilot study.	Battaglia C; Mancini F; Fabbri R; Persico N; Busacchi P; Facchinetti F; Venturoli S	2010	not reported	Italy and Spain	PCOS	High-income	not reported	40	Prospective, randomized, pilot trial	Multicentre (Bologna, Modena-Reggio Emilia, Barcelona)	Clinical examiners were blinded; participants not blinded → single-blind	Group I: Yasmin (drospirenone 3 mg + ethinylestradiol) days 1–21 per cycle; Group II: NuvaRing (EE + etonogestrel) days 1–21; duration 6 months	Continuous physiological/biochemical measures	not reported	19	51.4
69	L-arginine plus drospirenone–ethinyl estradiol in the treatment of patients with PCOS: a prospective, placebo-controlled, randomized pilot study	Cesare Battaglia, Fulvia Mancini, Bruno Battaglia, Fabio Facchinetti, Paolo G. Artini, Stefano Venturoli	2010	Not reported	Italy	PCOS	High-income	None (no external funding)	28	Prospective randomized placebo-controlled pilot trial	University hospital (Dept. of Gynecology, Univ. of Bologna)	Double-blind (patients + examiners)	Group I: EE/DRSP (Yasmin® 30 µg EE + 3 mg DRSP; days 1–21) + placebo. Group II: Same EE/DRSP regimen + oral L-arginine 4 g ×2/day (days 1–28). Duration 6 months.	Vascular (brachial FMD, Doppler PI), hormonal (T, A, SHBG), ultrasound ovarian parameters, BP (24-hr ABPM), nitric oxide metabolites (NO₂/NO₃)	No	18	48.6
70	Use of an aromatase inhibitor in patients with polycystic ovary syndrome: a prospective randomized trial	Ülkü Bayar, Mustafa Basaran, Sibel Kiran, Ayhan Coskun, Sener Gezer	2006	Not registered	Turkey	PCOS	Upper-middle-income	Not reported	80	Prospective randomized controlled trial	University hospital infertility clinic	Double-blind	Letrozole 2.5 mg/day (days 3–7) vs Clomiphene 100 mg/day (days 3–7)	Clinical (ovulation, pregnancy); biochemical (E2)	Not reported	20	54.1
71	Comparison of efficacy of aromatase inhibitor and clomiphene citrate in induction of ovulation in polycystic ovarian syndrome.	Begum MR; Ferdous J; Begum A; Quadir E	2009	not reported	Bangladesh	PCOS	Lower-middle-income	not reported	64	Prospective, randomized, not blinded, controlled trial	Single-centre, tertiary infertility care unit	Not blinded (open-label)	Letrozole 7.5 mg/day for 5 days from cycle day 3 CC 150 mg/day for 5 days from cycle day 3	Clinical, hormonal, ultrasonographic	not specified	15	40.5
72	Effect of phlebotomy versus oral contraceptives containing cyproterone acetate on the clinical and biochemical parameters in women with polycystic ovary syndrome: a randomized controlled trial	Samira Behboudi-Gandevani; Hayedeh Abtahi; Navid Saadat; Maryam Tohidi; Fahimeh Ramezani Tehrani	2019	IRCT2013080514277N1	Iran	PCOS	Upper-middle-income	None reported	64	Parallel randomized controlled trial (non-inferiority)	Single academic endocrine center	Open-label	Single phlebotomy (450 mL whole blood) vs EE 35 μg + cyproterone acetate 2 mg for 3 months	Metabolic, hormonal, clinical	Not reported	24	64.9
73	Psychotherapy With Somatosensory Stimulation for Endometriosis-Associated Pain: The Role of the Anterior Hippocampus	Florian Beissner, Christine Preibisch, Annemarie Schweizer-Arau, Roxana M. Popovici, Karin Meissner	2018	NCT01321840	Germany	Endometriosis	High-income	Horst Görtz Foundation; Schweizer-Arau Foundation; Theophrastus Foundation	67	Randomised controlled trial (waitlist-controlled)	Single-centre (Munich, Germany)	Unblinded	Integrative psychotherapy combining hypnotherapy, mindfulness, CBT, problem-solving therapy + acupuncture/moxibustion vs waitlist	Clinical, psychological, neuroimaging	Not reported	17	45.9
74	Exercise training and reproductive outcomes in women with polycystic ovary syndrome: a pilot randomized controlled trial	Jamie L. Benham, Jane E. Booth, Bernard Corenblum, Steve Doucette, Christine M. Friedenreich, Doreen M. Rabi, Ronald J. Sigal	2021	NCT03362918	Canada	PCOS	High-income	Cumming School of Medicine Clinical Research Fund; Libin Cardiovascular Institute Grant	47	Pilot randomized controlled trial	Single-centre	Assessors & lab personnel blinded; participants unblinded	HIIT (10×30s at 90% HRR) vs CAET (40 min at 50–60% HRR) vs no-exercise control	Clinical, metabolic, anthropometric, reproductive	Not reported	16	43.2
75	The effect of physical training on bone mineral density in women with endometriosis treated with GnRH analogs: a pilot study.	BergstrÃ¶m I; Freyschuss B; Jacobsson H; Landgren BM	2005	NR	Sweden	Endometriosis	High-income	Financial support from World Class Stockholm and AstraZeneca.	19	Randomized controlled pilot trial, two parallel arms (training vs control).	multicentre	NR	GnRH analog: Goserelin total dose 21.6 mg over 6 months (either 3.6 mg every 4 weeks or 10.8 mg every 12 weeks). Intervention group: Structured physical training program (3×30-min fast walks + 2×1-h aerobic sessions weekly) for 12 months. Control group: No lifestyle modification advice.	Safety/long-term treatment effect outcome: Bone mineral density (BMD) at femoral neck and lumbar spine (L2–L4).	NR	19	51.4
76	Metformin versus Insulin in the Management of Pre-Gestational Diabetes Mellitus in Pregnancy and Gestational Diabetes Mellitus at the Korle Bu Teaching Hospital: A Randomized Clinical Trial	Titus Beyuo; Samuel Amenyi Obed; Kenneth K. Adjepong-Yamoah; Kwasi A. Bugyei; Samuel Antwi Oppong; Kissinger Marfoh	2015	ACTRN12614000942651	Ghana	GDM	Lower-middle-income	None reported	104	Randomized controlled trial (open-label)	Single tertiary teaching hospital (Korle Bu)	Open-label	Metformin (500 mg → up to 2500 mg/day; insulin added if needed) vs Insulin (premixed ± soluble insulin)	Glycemic profile (FBG, 1-hr, 2-hr PP); maternal outcomes; neonatal outcomes	No	21	56.8
77	Comparative study of the therapeutic effects of oral contraceptive pills containing desogestrel, cyproterone acetate, and drospirenone in patients with polycystic ovary syndrome	Sudhindra Mohan Bhattacharya, Ayan Jha	2012	CTRI/2010/091/000332	India	PCOS	Lower-middle-income	Not reported	171	Double-blind randomized controlled trial (three-arm)	Single gynecologic clinic (private hospital)	Double-blind (participants and investigators)	Desogestrel-EE vs cyproterone acetate-EE vs drospirenone-EE, cyclic use for 12 months	Clinical, hormonal, metabolic	Not reported	27	73
78	The Effect of Ethinylestradiol (EE)/Cyproterone Acetate (CA) and EE/CA Plus Metformin Treatment on Adhesion Molecules in Cases with Polycystic Ovary Syndrome (PCOS)	Oktay Bilgir, Levent Kebapcilar, Cuneyt Taner, Ferda Bilgir, Ayse Kebapcilar, Giray Bozkaya, Yasar Yildiz, Arif Yuksel, Ismail Sari	2009	Not reported	Turkey	PCOS	Upper-middle-income	Not reported	40	Randomized controlled trial (parallel)	Single-centre tertiary training & research hospitals	Open-label	EE 35 µg + cyproterone acetate 2 mg daily (21/28 days) vs same regimen plus metformin 850 mg twice daily for 3 months	Biochemical / inflammatory	Not reported	20	54.1
79	Metformin administration was associated with a modification of LH, prolactin and insulin secretion dynamics in women with polycystic ovarian syndrome	Evangelia Billa; Niki Kapolla; Stamatina C. Nicopoulou; Eftychia Koukkou; Evangelia Venaki; Spyros Milingos; Aristides Antsaklis; Dimitrios A. Adamopoulos	2009	Pre-registered clinical protocol (Lancet 364:911–912); registration number not stated	Greece	PCOS	High-income	Not reported	64	Prospective randomized placebo-controlled trial	University hospital endocrine & gynecology departments	Double-blind (metformin vs placebo)	Metformin 850 mg twice daily vs placebo for ~40 days	Hormonal, metabolic, reproductive	Not reported	16	43.2
80	Treatment of premenstrual dysphoric disorder with the GABAA receptor modulating steroid antagonist Sepranolone (UC1010)—A randomized controlled trial	Bixo M., Ekberg K., Sundström Poromaa I., Lindén Hirschberg A., Fianu Jonasson A., Andréen L., Timby E., Wulff M., Ehrenborg A., Bäckström T.	2017	NCT01875718; EudraCT 2012-004081-18	Sweden	PMDD	High-income	Asarina Pharma AB (industry-funded)	126	Randomized, double-blind, placebo-controlled, parallel-group Phase I/II RCT	10 Swedish centers (university, tertiary, secondary, private clinics)	Double-blind with unblinded injectors	UC1010 10 mg or 16 mg SC every 2 days × 5 doses during luteal phase vs placebo	Clinical: symptom severity (DRSP), impairment; safety labs; PK	Not reported	28	75.7
81	Simple lifestyle recommendations and the outcomes of gestational diabetes: A 2×2 factorial randomized trial	Simona Bo, Rosanna Rosato, Giuseppe Ciccone, Silvia Canil, Roberto Gambino, Cristina B. Poala, Francesca Leone, Alessia Valla, Giovanni Grassi, Ezio Ghigo, Gabriella Menato	2014	ClinicalTrials.gov NCT01506310	Italy	GDM	High-income	Regione Piemonte (Italy) Grant 2009	200	2×2 factorial randomized controlled trial	Single-centre (Sant’Anna Hospital, University of Turin)	Blinded outcome assessors, dieticians, and obstetricians; participants unblinded	Four groups: (1) diet only; (2) diet + behavioral advice; (3) diet + exercise (20 min brisk walk/day); (4) combined behavioral + exercise	Clinical, biochemical, maternal/neonatal	Not specified	30	81.1
82	The effects of different therapeutic modalities on cardiovascular risk factors in women with polycystic ovary syndrome: A randomized controlled study	Serkan Bodur, Ozgur Dundar, Mine Kanat-Pektas, Mehmet Ferdi Kinci, Levent Tutuncu	2018	Not registered	Turkey	PCOS	Upper-middle-income	Gulhane Military Medical Academy (study originally a thesis project)	87	Randomized, prospective, controlled, 4-arm parallel-group clinical trial	Multicentre across ≥3 hospitals in Turkey (Ankara, Istanbul, Afyon)	None stated → appears open-label	Group I: 3 mg drospirenone + 30 μg ethinyl estradiol (OC) daily × 6 cycles; Group II: metformin 1700 mg/day; Group III: OC + metformin; Group IV: no treatment	Clinical (anthropometry), metabolic (lipids, ApoB, adiponectin, hsCRP, PAI-1, HOMA-IR), biochemical	Not reported	21	56.8
83	Effect of the Pregnant+ smartphone application in women with gestational diabetes mellitus: a randomised controlled trial in Norway	Iren Borgen, Milada Cvancarova Småstuen, Anne Flem Jacobsen, Lisa Maria Garnweidner-Holme, Seraj Fayyad, Josef Noll, Mirjam Lukasse	2019	NCT02588729	Norway	GDM	High-income	Norwegian Research Council (ID 228517)	238	Parallel, non-blinded RCT	Multicentre (5 diabetes outpatient clinics, Oslo)	Non-blinded participants/clinicians; lab staff & statistician blinded	Pregnant+ smartphone app + usual care vs usual care alone	Clinical & behavioural	No	28	75.7
84	Probiotic dietary intervention in polycystic ovary syndrome – A randomized controlled trial	Valentin Borzan, Regina Riedl, Barbara Obermayer-Pietsch	2023	EudraCT 2020-000228-20; NCT04593459	Austria	PCOS	High-income	Austrian Federal Government (COMET K1 Centre); Land Steiermark; Land Wien; Institut AllergoSan; Winclove Probiotics	180	Phase IV RCT	Single-centre	Double-blind for probiotic vs placebo; open-label for metformin	Probiotic supplement vs placebo; open-label metformin as positive control	Clinical (endocrine/metabolic), microbiome, QoL	Not reported	27	73
85	Cinnamon improves metabolic factors without detectable effects on adiponectin in women with polycystic ovary syndrome	Azam Borzoei, Maryam Rafraf, Mohammad Asghari-Jafarabadi	2018	IRCT201508173664N14	Iran	PCOS	Upper-middle-income	Research Vice-Chancellor, Tabriz University of Medical Sciences	84	Randomized double-blind placebo-controlled clinical trial	Single center (Mohheb Yas Hospital, Tehran)	Double-blind (participants & investigators)	3 × 500 mg cinnamon capsules/day vs placebo for 8 weeks	Biochemical (glucose, insulin, HOMA-IR, adiponectin, lipids); anthropometric	Not reported	26	70.3
86	Beneficial Effects of RESMENA Diet on Anthropometric, Metabolic, and Reproductive Profile in Adolescents with Obesity and Polycystic Ovary Syndrome: A Randomized Controlled Intervention Study	Rukiye Bozbulut, Esra Döğer, Mahmut Orhun Çamurdan, Aysun Bideci	2024	NCT05768724	Turkey	PCOS	Upper-middle-income	No specific external funding reported	68	Randomized, single-blind, two-arm, parallel RCT	Pediatric endocrinology outpatient clinic, university hospital	Single-blind: assessors (endocrinologist, radiologist, lab staff) blinded; participants unblinded	RESMENA diet (7 meals/day; low glycemic load; high protein; high omega-3; high antioxidant) vs AHA diet (3–5 meals/day; higher carbohydrate)	Clinical, biochemical, anthropometric, hormonal	Not reported	22	59.5
87	Cost-effectiveness of healthy eating and/or physical activity promotion in pregnant women at increased risk of gestational diabetes: economic evaluation alongside the DALI RCT	Karen Broekhuizen, David Simmons, Roland Devlieger, André van Assche, Goele Jans, Sander Galjaard, Rosa Corcoy, Juan M. Adelantado, Fidelma Dunne, Gernot Desoye, Jürgen Harreiter, Alexandra Kautzky-Willer, Peter Damm, Elisabeth R. Mathiesen, Dorte M. Jensen, Liselotte L. Andersen, Annunziata Lapolla, Maria G. Dalfra, Alessandra Bertolotto, Ewa Wender-Ozegowska, Agnieszka Zawiejska, David Hill, Fr…	2018	ISRCTN70595832	Nine European countries	GDM	High-income	European FP7 (major), plus national funding (NL, PL, DK, UK, ES)	435	Factorial parallel RCT	Multicentre (11 centres in 9 countries)	Unblinded participants & coaches; outcome assessors not blinded	HE+PA, HE only, PA only vs usual care	Clinical, metabolic, economic	Not used	29	78.4
88	Effects of Exercise on Lipoprotein Particles in Women with Polycystic Ovary Syndrome	Brown A.J., Setji T.L., Sanders L.L., Lowry K.P., Otvos J.D., Kraus W.E., Svetkey L.P.	2009	Not registered (pre–trial registry era)	USA	PCOS	High-income	NIH grants K23HL04390-01 and MO1-RR-30	37	Randomized controlled trial	Single centre (Duke University Medical Center)	None – open-label (exercise vs. no lifestyle change)	8–12-week ramp-up → 12-week moderate-intensity exercise (~228 min/week at 40–60% VO₂ peak) vs. no exercise	Metabolic (lipoprotein subclasses, insulin metrics), clinical (blood pressure, anthropometry)	Not used/reported	18	48.6
89	Changing diagnostic criteria for gestational diabetes (CDC4G) in Sweden: A stepped wedge cluster randomised trial	Maryam de Brun, Anders Magnuson, Scott Montgomery, Snehal Patil, David Simmons, Kerstin Berntorp, Stefan Jansson, Ulla-Britt Wennerholm, Anna-Karin Wikström, Helen Strevens, Fredrik Ahlsson, Verena Sengpiel, Erik Schwarcz, Elisabeth Storck-Lindholm, Martina Persson, Kerstin Petersson, Linda Ryen, Carina Ursing, Karin Hildén, Helena Backman	2024	ISRCTN41918550	Sweden	GDM	High-income	Swedish Research Council; ALF Funding Region Örebro; Nyckelfonden; Region Skåne R&D Foundation; Uppsala–Örebro Regional Research Committee	47080	Stepped wedge cluster randomised controlled trial (SW-CRT)	Multi-centre (17 delivery units in 11 clusters)	Open-label (pragmatic unblinded design)	Implementation of WHO 2013 vs Swedish GDM diagnostic criteria	Clinical / population-based (maternal + neonatal outcomes)	Yes – referenced GDM core outcome set	34	91.9
90	Adherence to a lifestyle programme in overweight/obese pregnant women and effect on gestational diabetes mellitus: a randomized controlled trial	Raffaele Bruno, Elisabetta Petrella, Valentina Bertarini, Giulia Pedrielli, Isabella Neri, Fabio Facchinetti	2017	ClinicalTrials.gov NCT01783210	Italy	GDM	High-income	Policlinico University Hospital of Modena	191	Parallel, open-label randomized controlled trial	Single-centre (Policlinico di Modena, Italy)	Single-blind (obstetricians and outcome assessors blinded)	Personalized hypocaloric, low-glycaemic, low-saturated fat diet (1500 kcal/day + 200–300 kcal for PA) with counselling and follow-up vs standard care with booklet and verbal advice	Clinical and behavioural	Not reported	27	73
91	Prevention of gestational diabetes: feasibility issues for an exercise intervention in obese pregnant women	Leonie K. Callaway, Paul B. Colditz, Nuala M. Byrne, Barbara E. Lingwood, Ingrid J. Rowlands, Katie Foxcroft, H. David McIntyre	2010	ACTRN012606000271505	Australia	GDM	High-income	Royal Brisbane and Women’s Hospital Foundation	50	Pilot parallel RCT	Single-centre	Open-label	Goal-directed individualized exercise program (≥900 kcal/week exercise) vs routine obstetric care	Clinical & behavioural	Not used	18	48.6
92	The efficacy of Tung’s acupuncture for sex hormones in polycystic ovary syndrome: A randomized controlled trial	Yu Cao, He Chen, Danyang Zhao, Li Zhang, Xiaogang Yu, Xinmin Zhou, Zhishun Liu	2019	ClinicalTrials.gov NCT02729545	China	PCOS	Upper-middle-income	Beijing TCM Science & Technology Development Fund (JJ2015-42)	60	Parallel RCT	Single hospital (Beijing Hospital of Integrated TCM & Western Medicine)	Participants & assessors blinded to allocation process; acupuncturists not blinded	Tung’s acupuncture twice weekly × 12 weeks vs CPA/EE (Diane-35) daily × 3 cycles	Clinical (hormones, menstruation), anthropometric, ovarian morphology	Not used	23	62.2
93	Homocysteine levels are unaffected by metformin treatment in both nonpregnant and pregnant women with polycystic ovary syndrome	Sven M. Carlsen, Sigrun Kjøtrød, Eszter Vanky, Pål R. Romundstad	2007	Not reported	Norway	PCOS	High-income	Study medication supplied free by Weifa AS; institutional support	101	Two prospective randomized placebo-controlled trials	University hospital IVF unit and obstetrics departments	Double-blind (identical placebo capsules)	Metformin 1000 mg BID for 16 weeks (nonpregnant) or 850 mg BID throughout pregnancy vs placebo; all received diet/lifestyle advice and folate/B-vitamin supplementation	Biochemical / metabolic	Not reported	20	54.1
94	A randomized controlled trial of a web-based education intervention for women with gestational diabetes mellitus	Mary Carolan-Olah, Padaphet Sayakhot	2019	ACTRN12615000697583	Australia	GDM	High-income	Diabetes Australia Grant Y13G-CARM	110	Randomized controlled trial (parallel-group)	Single centre (large Melbourne metropolitan hospital)	Not blinded (nature of intervention prevents blinding)	Standard clinic-based GDM class vs. clinic class + web-based educational program	Clinical outcomes, behavioural, metabolic	Not reported	24	64.9
95	Elagolix, an Oral GnRH Antagonist, Versus Subcutaneous Depot Medroxyprogesterone Acetate for the Treatment of Endometriosis: Effects on Bone Mineral Density	Carr B., Dmowski W.P., O’Brien C., Jiang P., Burke J., Jimenez R., Garner E., Chwalisz K.	2014	Not reported	USA	Endometriosis	High-income	Industry funded: Neurocrine Biosciences & AbbVie	252	Phase II multicenter randomized double-blind RCT	78 U.S. centers	Double-blind (participants, investigators, most staff)	Elagolix 150 mg QD; Elagolix 75 mg BID; comparator DMPA-SC 104 mg	Clinical (BMD, pain), QoL, safety	Not reported	29	78.4
96	Randomized study on the effectiveness of nomegestrol acetate plus 17Î²-estradiol oral contraceptive versus dienogest oral pill in women with suspected endometriosisâ€‘associated chronic pelvic pain.	Caruso S; Cianci A; Iraci Sareri M; Panella M; Caruso G; Cianci S	2022	not reported	Italy	Endometriosis	High-income	none	197	Randomized Controlled Trial (RCT)	Multi-centre (Gynecological Clinics, University of Catania, University of Messina)	Open-label	E2/NOMAC 1.5 mg/2.5 mg daily, 24/4-day regimen Dienogest 2 mg daily	Continuous: VAS (CPP, dysmenorrhea, dyspareunia), SF-36, FSFI, FSDS Categorical: Amenorrhea, discontinuation, satisfaction	not reported	28	75.7
97	Control of endometriosis-associated pain with etonogestrel-releasing contraceptive implant and 52-mg levonorgestrel-releasing intrauterine system: randomized clinical trial	Carvalho N., Margatho D., Cursino K., Benetti-Pinto C.L., Bahamondes L.	2018	NCT02480647	Brazil	Endometriosis	Upper-middle-income	São Paulo Research Council; Brazilian National Research Council; unrestricted Merck & ICA Foundation support	103	Randomized controlled noninferiority trial (open-label)	Single university teaching hospital (Campinas, Brazil)	Open-label (no blinding possible due to nature of devices)	ENG implant (Implanon NXT) vs LNG-IUS (52 mg)	Clinical (VAS pelvic pain & dysmenorrhea), HRQoL, bleeding patterns	None reported	25	67.6
98	Glyburide in Women With Mild Gestational Diabetes: A Randomized Controlled Trial	Brian M. Casey, Elaine L. Duryea, Mina Abbassi-Ghanavati, Carmen M. Tudela, Stephan A. Shivvers, Donald D. McIntire, Kenneth J. Leveno	2015	NCT00744965	United States	GDM	High-income	Department of Obstetrics & Gynecology, UT Southwestern (local institutional funding)	395	Randomized, double-blind, placebo-controlled trial	Single tertiary hospital (Parkland Hospital)	Double-blind (participants, clinicians, assessors blinded)	Glyburide (2.5–20 mg/day titrated) vs placebo + standardized diet therapy	Maternal glycemic, obstetric, neonatal clinical outcomes	Not reported	31	83.8
99	Dienogest vs GnRH agonists as postoperative therapy after laparoscopic eradication of deep infiltrating endometriosis with bowel and parametrial surgery: a randomized controlled trial	Marcello Ceccaroni, Roberto Clarizia, Stefano Liverani, Agnese Donati, Matteo Ceccarello, Maria Manzone, Giovanni Roviglione, Simone Ferrero	2021	Not reported	Italy	Endometriosis	High-income	None declared; no conflicts	170	Prospective randomized controlled trial	Single high-volume tertiary center	Open-label (drug types distinguishable; no blinding described)	Group A: Triptorelin/Leuprorelin 3.75 mg IM every 4 weeks for 6 months. Group B: Dienogest 2 mg orally daily for ≥6 months	Clinical outcomes (pain VAS, symptoms), imaging outcomes, reproductive outcomes, tolerability	Not used	24	64.9
100	Impact of a tailored-care education programme on maternal and neonatal outcomes in pregnant women with gestational diabetes: a randomized controlled trial	Sihem Chahed, Latifa Lassouad, Maha Dardouri, Ali Mtiraoui, Amel Maaroufi, Hedi Khairi	2022	PACTR202106591503674	Tunisia	GDM	Upper-middle-income	Not specified (academic institutional study)	121	Parallel, randomized controlled trial	Single-centre (Farhat Hached University Hospital, Sousse)	Single-blind (assessors blinded; participants and educators unblinded)	Six-day tailored self-care education programme (midwife, endocrinologist, nurse, dietitian) covering insulin, nutrition, glycaemia monitoring vs usual GDM care	Clinical	Not reported	26	70.3
101	Short-term effectiveness of low dose liraglutide in combination with metformin versus high dose liraglutide alone in treatment of obese PCOS: randomized trial.	Chaichian S; Saadat Mostafavi SR; Mehdizadehkashi A; Najmi Z; Tahermanesh K; Ahmadi Pishkuhi M; Jesmi F; Moazzami B	2022	IRCT2015081723666N1, 01/02/2016	Iran	PCOS	Upper-middle-income	Iran University of Medical Sciences and Pars Advanced and Minimally Invasive Medical Manners Research Center	50	Randomized, double-blind, intra-patient control trial	Tertiary care hospitals (Rasoul-e-Akram and Pars Hospitals, Tehran)	Patient blinded (sutures masked side), sonographer blinded, analyst blinded (coded data)	HYAcorp Endogel vs ovarian suspension	Ovarian adhesion rate, ovarian mobility, site-specific tenderness, fading margin, adhesions at multiple pelvic sites	No formal core outcome set used	26	70.3
102	Randomized trial examining effectiveness of lifestyle intervention in reducing gestational diabetes in high-risk Chinese pregnant women in Hong Kong	Ruth Suk-Mei Chan, Wing-Hung Tam, Ivan Chak-Hang Ho, Macy Wai-Chi Kwan, Liz Sin Li, Mandy Man-Mei Sea, Jean Woo	2018	NCT02368600	Hong Kong (China)	GDM	High-income	Health and Medical Research Fund, Food and Health Bureau, Hong Kong SAR Government	220	Parallel, single-blind RCT	Single-centre (antenatal clinic, Chinese University of Hong Kong)	Single-blind (investigators and assessors blinded; participants not blinded)	Dietitian-led program with biweekly sessions (first 2 months) then monthly until 24 wks; individualised diet plan (low-fat, low-GI, moderate CHO), exercise counselling (30 min, 3x/week)	Clinical and behavioural	Not reported	27	73
103	A Randomized Controlled Trial of Prenatal Physical Activity to Prevent Gestational Diabetes: Design and Methods	Lisa Chasan-Taber, Bess H. Marcus, Edward Stanek III, Joseph T. Ciccolo, David X. Marquez, Caren G. Solomon, Glenn Markenson	2009	NCT00476567	United States	GDM	High-income	National Institutes of Health (NIDDK Grant R01 DK074876)	364	Parallel, two-arm, randomized controlled trial	Single-centre (Baystate Medical Center, Massachusetts)	Single-blind (outcome assessors and statisticians blinded)	12-week motivationally tailored exercise intervention (Transtheoretical + Social Cognitive model) encouraging ≥30 min/day moderate PA vs health/wellness education (control)	Clinical, biochemical, and behavioural	Not specified	28	75.7
104	Insulin-stimulated release of D-chiro-inositol-containing inositolphosphoglycan mediator correlates with insulin sensitivity in women with polycystic ovary syndrome.	Cheang KI; Baillargeon JP; Essah PA; Ostlund RE Jr; Apridonize T; Islam L; Nestler JE	2008	NCT00497653	USA	PCOS	High-income	NIH Grants: R01HD35629, K24HD40237, K23HD049454, R01DK58698; Fond de Recherche en Santé du Québec #2834	11	Randomized controlled trial	Single center (Virginia Commonwealth University, General Clinical Research Center)	Open-label (no blinding mentioned)	DCI 1200 mg twice daily vs placebo for 6 weeks	Biochemical: plasma DCI; DCI-IPG mediator bioactivity; serum insulin, glucose, testosterone; FSIVGTT indices (Si, AIRg, DI)	not reported	14	37.8
105	Efficacy and safety of Remifemin on peri-menopausal symptoms induced by post-operative GnRH-a therapy for endometriosis: a randomized study versus Tibolone	Jiming Chen; Hongyan Gao; Qin Li; Jing Cong; Jie Wu; Dahua Pu; Guohua Jiang	2014	Not reported	China	Endometriosis	Upper-middle-income	Changzhou Medical Innovative Youth Personnel Project (KY201139)	116	Prospective randomized controlled trial	Two affiliated university hospitals	Open-label	Remifemin 20 mg BID orally vs Tibolone 2.5 mg QD orally for 12 weeks after GnRH-a injections	Symptom control, safety, hormonal	Not reported	22	59.5
106	Efficacy and Safety Investigation of Kuntai Capsule for the Add-back Therapy of Gonadotropin Releasing Hormone Agonist Administration to Endometriosis Patients: A Randomized, Double-blind, Blank- and Tibolone-controlled Study	Ji-Ming Chen, Hong-Yan Gao, Yi Ding, Xia Yuan, Qing Wang, Qin Li, Guo-Hua Jiang	2015	Not reported	China	Endometriosis	Upper-middle-income	Changzhou Medical Innovative Youth Personnel Project (Changzhou Health and Science [2010] No. 368 KY201139)	90	Randomized double-blind controlled trial (three-arm)	Two tertiary hospitals (gynecology departments)	Double-blind (Kuntai vs Tibolone; control unblinded)	Kuntai capsule 4 capsules TID for 12 weeks vs Tibolone 2.5 mg/day vs no add-back therapy, all with GnRH-a injections	Symptom-based, biochemical, safety	Not reported	24	64.9
107	Frozen versus Fresh Embryo Transfer in Women with Polycystic Ovary Syndrome	Zi-Jiang Chen, Yun Sun, Shujuan Pan, et al.	2016	NCT01841528	China	PCOS	Upper-middle-income	National Basic Research Program of China (973 Program); National Natural Science Foundation of China; Shandong key R&D program	1508	Randomized controlled trial (parallel)	Multiple centres (China)	Open-label (participants, clinicians not blinded); outcome assessors masked	Frozen-embryo transfer with programmed artificial cycle vs fresh-embryo transfer	Reproductive, obstetric, neonatal	Not reported	33	89.2
108	Sequential 2.5 mg letrozole/FSH therapy is more effective for promoting pregnancy in infertile women with PCOS: a pragmatic randomized controlled trial	Li-Juan Chen, Yi Liu, Ling Zhang, Jing-Yi Li, Wen-Qian Xiong, Tao Li, Hui Ding, Bing-Jie Li	2024	ChiCTR2300069638	China	PCOS	Upper-middle-income	National Social Science Foundation of China (Grant 81974242); Joint Project U20A20349	220	Pragmatic randomized controlled trial	Single-centre tertiary hospital (Union Hospital, Tongji Medical College)	Open-label for participants & physicians; evaluators blinded	Letrozole 2.5 mg or 5 mg (days 3–7) + sequential FSH 75 IU (days 8–10) for 1–3 cycles	Clinical (pregnancy outcomes, ovulation), physiological (follicle metrics & hormones), adverse effects	Not reported	25	67.6
109	Effects of combined metformin and semaglutide therapy on body weight, metabolic parameters, and reproductive outcomes in overweight/obese women with PCOS	Haiyan Chen, Xiaohui Lei, Zhuoran Yang, Yuxin Xu, Dongfang Liu, Cong Wang, Hu Du	2025	ChiCTR2400090908	China	PCOS	Upper-middle-income	Chongqing Medical Scientific Research Project; National Natural Science Foundation of China; CSTC Grants	84	Prospective randomized controlled open-label parallel trial	Single-centre (Second Affiliated Hospital, Chongqing Medical University)	Open-label (no participant or provider blinding)	MET 1000 mg BID vs MET 1000 mg BID + semaglutide 1 mg weekly	Clinical, metabolic, endocrine, reproductive	Not reported	26	70.3
110	A randomized, parallel, comparative study of the efficacy and safety of nafarelin versus danazol in the treatment of endometriosis in Taiwan.	Cheng MH; Yu BK; Chang SP; Wang PH	2005	NR	Taiwan	Endometriosis	Upper-middle-income	Taipei Veterans General Hospital grant VGH94-195	59	Randomized, parallel-group, comparative controlled trial.	multicentre hospital-based	NR	Nafarelin: intranasal spray 200 μg twice daily (400 μg/day). Danazol: oral 600 mg/day (200 mg three times daily). Duration: 180 days.	Clinical (symptom severity), surgical (laparoscopic score), laboratory safety outcomes.	NR	17	45.9
111	Clinical outcomes of ovulation induction with metformin, clomiphene citrate and human menopausal gonadotrophin in polycystic ovary syndrome	Jing Cheng; Jing Lv; Chun-Yan Li; Ying Xue; Zhi Huang; Wei Zheng	2010	Not reported	China	PCOS	Upper-middle-income	Not reported	60	Prospective randomized placebo-controlled trial (pilot)	University reproductive health centre	Double-blind (metformin vs placebo)	Metformin 500 mg TID + CC 50 mg (days 3–7) + HMG 75 IU/day vs placebo + CC + HMG for up to 3 cycles	Reproductive, hormonal, safety	Not reported	19	51.4
112	Effect of green cardamom on the expression of genes implicated in obesity and diabetes among obese women with polycystic ovary syndrome: a double blind randomized controlled trial	Sahar Cheshmeh, Negin Elahi, Maysa Ghayyem, Elaheh Mosaieby, Shima Moradi, Yahya Pasdar, Susan Tahmasebi, Mehdi Moradinazar	2022	IRCT20200608047697N1	Iran	PCOS	Upper-middle-income	Kermanshah University of Medical Sciences (Grant No. 990412)	199	Double-blind placebo-controlled RCT	Gynecology and infertility clinics (single regional setting)	Double-blind (participants & researchers)	3 g/day green cardamom (3×1000 mg capsules/day) + low-calorie diet vs placebo capsules + low-calorie diet	Clinical (anthropometry, glycemic, hormones), genetic (gene expression)	CONSORT used for design but no COS mentioned	28	75.7
113	Green cardamom plus low-calorie diet can decrease the expression of inflammatory genes among obese women with polycystic ovary syndrome: a double-blind randomized clinical trial	Sahar Cheshmeh, Maysa Ghayyem, Firoozeh Khamooshi, Neda Heidarzadeh-Esfahani, Negin Rahmani, Niloofar Hojati, Elaheh Mosaieby, Shima Moradi, Yahya Pasdar	2022	IRCT20200608047697N1	Iran	PCOS	Upper-middle-income	Kermanshah University of Medical Sciences (Grant 990412)	199	Double-blind, placebo-controlled randomized clinical trial	Single academic center (Kermanshah University clinics)	Double-blind (participants + researchers)	3 g/day green cardamom (3×1000 mg capsules) + low-calorie diet vs placebo + low-calorie diet for 16 weeks	Clinical (anthropometrics, hormones), inflammatory (cytokines, gene expression)	Not used	29	78.4
114	A pilot structured behavioural intervention trial to increase physical activity among women with recent gestational diabetes	N.W. Cheung, B.J. Smith, H.P. van der Ploeg, N. Cinnadaio, A. Bauman	2011	None reported	Australia	GDM	High-income	Part-funded by Diabetes Australia Research Grant	43	Pilot parallel RCT	Single tertiary centre (Westmead Hospital, Sydney)	Unblinded; outcome assessors not blinded	Behavioural counselling + pedometer + scheduled phone calls + postcards vs basic written advice only	Behavioural (PA change), clinical (BMI, OGTT categories)	None reported	16	43.2
115	A Pilot Randomised Controlled Trial of a Text Messaging Intervention with Customisation Using Linked Data from Wireless Wearable Activity Monitors to Improve Risk Factors Following Gestational Diabetes	N. Wah Cheung, Caron Blumenthal, Ben J. Smith, Roslyn Hogan, Aravinda Thiagalingam, Julie Redfern, Tony Barry, Nancy Cinnadaio, Clara K. Chow	2019	ACTRN12616000067471	Australia	GDM	High-income	Australian Diabetes Society–Sanofi Diabetes Research Grant	60	Randomised controlled pilot trial (2:1 allocation)	Single tertiary centre (Westmead Hospital, Sydney)	Open-label (analyst blinded)	“Smart Mums with Smart Phones”: customized text messages (3/week) + Fitbit Flex + 2 dietitian sessions vs. control (booklet only)	Behavioural + clinical	Not reported	27	73
116	Randomised Controlled Trial of a Customised Text Messaging and Activity Monitor Program for Lifestyle Improvement after Gestational Diabetes	Ngai Wah Cheung, David Simmons, Simone Marschner, Aravinda Thiagalingam, Dharmintra Pasupathy, Ben J. Smith, Victoria Flood, Mark McLean, Sarah J. Melov, Roslyn Hogan, et al.	2024	ACTRN12620000615987	Australia	GDM	High-income	Sydney Health Partners Medical Research Futures Fund; Westmead Applied Research Centre Scholarship	177	Parallel double-blind RCT	Multicentre (3 tertiary hospitals, Sydney)	Single-blind (statisticians); participants unblinded	Text messages (4/week, semi-personalised) + activity monitor (Garmin Vivofit 4) vs monitor only	Clinical, behavioural, patient-reported	No	30	81.1
117	Continuous positive airway pressure therapy in gestational diabetes with obstructive sleep apnea: a randomized controlled trial	Naricha Chirakalwasan, Somvang Amnakkittikul, Ekasitt Wanitcharoenkul, Suranut Charoensri, Sunee Saetung, Suwannee Chanprasertyothin, La-or Chailurkit, Panyu Panburana, Sommart Bumrungphuet, Ammarin Thakkinstian, Sirimon Reutrakul	2018	NCT02108197	Thailand	GDM	Upper-middle-income	Faculty of Medicine Ramathibodi Hospital (Mahidol University); equipment support from ResMed Thailand	36	Randomized controlled trial	Single tertiary referral hospital (Ramathibodi Hospital)	Open-label; outcome assessors unblinded	CPAP for 2 weeks vs waitlist control; all received standard GDM care	Metabolic, glycemic, maternal and neonatal	Not reported	21	56.8
118	Effect of metformin, orlistat and pioglitazone treatment on mean insulin resistance and its biological variability in polycystic ovary syndrome	L.W. Cho, E.S. Kilpatrick, B.G. Keevil, A.M. Coady, S.L. Atkin	2009	ISRCTN58369615	UK	PCOS	High-income	University of Hull	30	Randomized, open-label, parallel RCT	Single endocrine outpatient clinic (Hull Royal Infirmary)	Open-label	Metformin 500 mg TID vs Orlistat 120 mg TID vs Pioglitazone 45 mg QD	Metabolic (IR, hormones), anthropometric	Not reported	18	48.6
119	Six-month randomized, placebo controlled trial of synbiotic supplementation in women with polycystic ovary syndrome undergoing lifestyle modifications.	Chudzicka-StrugaÅ‚a I; Kubiak A; Banaszewska B; Wysocka E; Zwozdziak B; Siakowska M; Pawelczyk L; Duleba AJ	2025	NCT03325023 (clinicaltrials.gov; registered 26/10/2017)	Poland	PCOS	High-income	not reported	65	Randomized, double-blind, placebo-controlled trial (parallel design)	Single-center (Reproductive Endocrinology and Infertility Clinical Services, Poznan University of Medical Sciences)	Double-blind (participants and investigators)	Synbiotic supplementation (SANPROBI Super Formula: Bifidobacterium lactis W51/W52, Lactobacillus acidophilus W22, L. paracasei W20, L. plantarum W21, L. salivarius W24, L. lactis W19 + prebiotics inulin/fructooligosaccharides) + intensive lifestyle modifications (diet + exercise)	Clinical (BMI, waist/hip/thigh circumference, hirsutism, ovarian volume), endocrine (testosterone, LH, FSH, LH:FSH ratio, SHBG, DHEAS), metabolic (insulin, ISI, lipids), markers of endotoxemia (LPS, LPS:HDL, LBP)	not reported	23	62.2
120	A randomized controlled trial of laser treatment among hirsute women with polycystic ovary syndrome	W.J. Clayton, M. Lipton, J. Elford, M. Rustin, L. Sherr	2005	Not reported	U.K.	PCOS	High-income	Dermatrust	88	Randomized controlled trial (parallel-group)	NHS teaching hospital	Single-blind (participants and outcome assessor)	High-fluence alexandrite laser vs low-fluence sham laser	Clinical, psychological, quality of life	Not reported	20	54.1
121	Effects of carbohydrate-reduced diet associated with strength training on clinical signs of women with polycystic ovary syndrome: Randomized clinical trial	Laura Colonetti, Maria Laura Rodrigues Uggioni, Gabriele da Silveira Prestes, Luana Stangherlin, João Carlos Denoni Junior, Rafael Moura, Erica da Silva Sipriano, Kristian Madeira, Hemmylly Silveira Cardoso, Sarah Dagostin Ferraz, Mateus Marcelo Baptista, Antonio Jose Grande, Luciane Bisognin Ceretta, Maria Inês da Rosa, Tamy Colonetti	2025	RBR-4wjqxcv	Brazil	PCOS	Upper-middle-income	FAPESC (Santa Catarina Research Support Fund), Brazil	29	Randomized controlled trial (pilot RCT)	University clinic (single centre)	Assessor-blinded; professionals performing assessments blinded; participants not blinded	Low-carb diet (≤40% carbs) + strength training vs standard diet (≥50% carbs) + strength training	Clinical (hirsutism, acne, alopecia), hormonal labs	No	24	64.9
122	Ulipristal acetate for treatment of premenstrual dysphoric disorder: A proof-of-concept randomized controlled trial	Erika Comasco, Helena Kopp Kallner, Marie Bixo, Angelica L. Hirschberg, Sara Nyback, Haro de Grauw, C. Neill Epperson, Inger Sundström-Poromaa	2021	EudraCT 2016-001719-19	Sweden	PMDD	High-income	Swedish Research Council; Swedish Society of Medicine; drug supplied by Gedeon Richter	95	Multicenter, double-blind, parallel-group RCT	University hospitals in Sweden	Double-blind (participants & investigators)	Ulipristal acetate 5 mg daily vs placebo for three 28-day cycles	Clinical (symptom scores, remission), functional, quality of life	Not reported	31	83.8
123	Cognitive-behavioral therapy improves weight loss and quality of life in women with PCOS: a pilot randomized clinical trial	Cooney L., Milman L., Hantsoo L., Kornfield S., Sammel M., Allison K., Epperson C., Dokras A.	2018	NCT01899001	USA	PCOS	High-income	NIH training grant; Penn Presbyterian Harrison Award; NIH P50 MH099910; K12 HD085848	33	Open-label pilot RCT	Single tertiary PCOS center (University of Pennsylvania)	Open-label; outcome assessors/statisticians blinded for some measures	8 weeks CBT + 16 weeks lifestyle vs 16 weeks lifestyle alone (nutrition + exercise counselling)	Clinical (weight, mood, QoL), physiological (androgens, metabolic labs), stress response	Not reported	26	70.3
124	Long acting progestogens versus combined oral contraceptive pill for preventing recurrence of endometriosis related pain: the PRE-EMPT pragmatic, parallel group, open label, randomised controlled trial.	Cooper KG; Bhattacharya S; Daniels JP; Horne AW; Clark TJ; Saridogan E; Cheed V; Pirie D; Melyda M; Monahan M; Roberts TE; Cox E; Stubbs C; Middleton LJ	2024	ISRCTN97865475	UK	Endometriosis	High-income	NIHR (Ref: 11/114/01)	405	Pragmatic, parallel-group, open-label RCT	34 UK gynaecology clinics	open-labled	LAP (DMPA or LNG-IUS) vs COCP (30 μg ethinylestradiol + 150 μg levonorgestrel)	Patient-reported pain (EHP-30), QoL measures, treatment failure	Partial (2 of 3 core outcome set measures included; fatigue scale added per PPI input)	34	91.9
125	Preventing recurrence of endometriosis-related pain by means of long-acting progestogen therapy: the PRE-EMPT RCT	Kevin G Cooper, Siladitya Bhattacharya, Jane P Daniels, Versha Cheed, Laura Gennard, Lisa Leighton, Danielle Pirie, Melyda Melyda, Mark Monahan, Annalise Weckesser, Tracy Roberts, Elaine Denny, Laura Ocansey, Clive Stubbs, Emma Cox, Georgina Jones, T Justin Clark, Ertan Saridogan, Janesh K Gupta, Hilary OM Critchley, Andrew Horne, Lee J Middleton	2024	ISRCTN97865475	United Kingdom	Endometriosis	High-income	NIHR Health Technology Assessment Programme (award 11/114/01)	405	Randomized controlled multicentre pragmatic trial	34 UK NHS hospitals	Open-label (participants and clinicians unblinded); outcome assessors not blinded	LARC (LNG-IUS or DMPA injection) vs COCP (30 µg EE + 150 µg LNG) for 36 months post-surgery	Clinical pain outcomes; QoL; health economics	Yes (EHP-30 is core in endometriosis trials)	35	94.6
126	The effect of myoinositol supplementation on insulin resistance in patients with gestational diabetes	F. Corrado, R. D’Anna, G. Di Vieste, D. Giordano, B. Pintaudi, A. Santamaria, A. Di Benedetto	2011	NCT00734448	Italy	GDM	High-income	Not stated	84	Randomized controlled trial	Single university obstetric centre	Open-label	Myoinositol 4 g/day + folic acid 400 µg vs folic acid only; both groups on ADA diet	Biochemical (HOMA-IR, adiponectin, glucose, insulin)	None reported	18	48.6
127	A prospective, randomized, double-blind, placebo-controlled trial of multimodal intraoperative analgesia for laparoscopic excision of endometriosis	Michael F. Costello, Jason Abbott, Steven Katz, Thierry Vancaillie, Sally Wilson	2010	ACTRN012605000217606	Australia	Endometriosis	High-income	Australian Gynaecological Endoscopy Society (AGES) Grant 2003–2004; Royal Hospital for Women Foundation Grant 2003	66	Prospective randomized double-blind placebo-controlled trial	University teaching hospital endogynaecology department	Double-blind (participants, surgeons, anesthetists, assessors)	Multimodal intraoperative analgesia (PR diclofenac 100 mg + ropivacaine infiltration and topical application) vs placebo (saline + placebo suppository)	Pain, opioid consumption, perioperative safety	Not reported	29	78.4
128	Tighter or less tight glycaemic targets for women with gestational diabetes mellitus for reducing maternal and perinatal morbidity: A stepped-wedge, cluster-randomised trial	Caroline A. Crowther, Deborah Samuel, Ruth Hughes, Thach Tran, Julie Brown, Jane M. Alsweiler, for the TARGET Study Group	2022	ACTRN12615000282583	New Zealand	GDM	High-income	Health Research Council of New Zealand (Grant 14/499)	1100	Stepped-wedge cluster RCT	Multicentre (10 hospitals across NZ)	Participants blinded to target group; investigators aware	Tighter (FPG ≤5.0 mmol/L, 1h ≤7.4 mmol/L, 2h ≤6.7 mmol/L) vs less tight (FPG <5.5 mmol/L, 1h <8.0 mmol/L, 2h <7.0 mmol/L) glucose targets	Clinical and perinatal	Not specified	36	97.3
129	Metformin versus lifestyle changes in treating women with polycystic ovary syndrome	Curi D.D.G., Fonseca A.M., Marcondes J.A.M., Almeida J.A.M., Bagnoli V.R., Soares-Jr J.M., Baracat E.C.	2012	Not registered	Brazil	PCOS	Upper-middle-income	Not stated	40	Prospective randomized clinical trial	University tertiary gynecology & endocrinology centers (São Paulo)	Open-label	Metformin 850 mg BID × 6 months vs individualized diet + exercise program × 6 months	Clinical (menstrual cycle index), metabolic & hormonal outcomes	Not reported	22	59.5
130	Omega-3 Fatty Acid Supplementation Decreases Liver Fat Content in Polycystic Ovary Syndrome: A Randomized Controlled Trial Employing Proton Magnetic Resonance Spectroscopy	Andrea J. Cussons, Gerald F. Watts, Trevor A. Mori, Bronwyn G.A. Stuckey	2009	NCT00620529	Australia	PCOS	High-income	Pfizer Australia CV & Lipid Research Grant; NHMRC Clinical Centre of Excellence; institutional support	25	Double-blind randomized crossover RCT	Tertiary cardiovascular/endocrine research centres	Double-blind; capsules identical	Omega-3 fatty acids 4 g/day vs placebo (olive oil) for 8 weeks, 8-week washout, then crossover	Metabolic, hepatic, hormonal, cardiovascular	Not reported	25	67.6
131	Ovulation induction using sequential letrozole/gonadotrophin in infertile women with PCOS: a randomized controlled trial	Xin Dai; Jingyi Li; Tian Fu; Xuefeng Long; Xiaoou Li; Ruiwen Weng; Yi Liu; Ling Zhang	2023	ChiCTR1900022971	China	PCOS	Upper-middle-income	No financial/commercial conflicts reported	174	Parallel 1:1 RCT	Single tertiary hospital reproductive centre	Open-label for participants/clinicians; assessors blinded	Letrozole vs letrozole + 75 IU HMG (cycle days 8–10)	Clinical reproductive outcomes	Not reported	28	75.7
132	Follicular phase dexamethasone administration in polycystic ovarian syndrome patients who are clomiphene citrate resistant	Emad Darwish, Yasser Saad Elkassar, Ahmed Samy El-Agwany	2015	Not reported	Egypt	PCOS	Lower-middle-income	Not reported	85	Randomized controlled trial	Single university maternity hospital (El-Shatby, Alexandria)	Not blinded (no statement of blinding)	Group I: CC 200 mg ×7 days + dexamethasone 2 mg ×10 days from day 3; Group II: CC 200 mg ×7 days	Ovulation, biochemical pregnancy, hormones, endometrium	Not reported	19	51.4
133	Step and weight tracking with targets and coaching interventions in gestational diabetes: A randomized factorial feasibility trial	Kaberi Dasgupta, Deborah Chan, Rachel Bond, Susan Joanne Wang, Natasha Garfield, Jillian Coolen, Ilana Halperin, et al.	2025	NCT03802877	Canada	GDM	High-income	Lawson Foundation	227	2×2 factorial RCT (feasibility)	Multicentre (5 diabetes clinics)	Open-label; assessors not blinded	Track & Target (weekly step + weight goals), Coaching (phone-based motivational support), Both, or Neither	Behavioural	Not used	27	73
134	A randomised controlled trial on the effects of a structural education module among women with PCOS on nutrition and physical activity changes	Sareh Dashti, Habibah Abdul Hamid, Suriani Mohamad Saini, Maiza Tusimin, Maimunah Ismail, Ali Jafarzadeh Esfehani, Siew Mooi Ching, Kai Wei Lee, Norzian Ismail, Jie Lin Wong, Latiffah Abdul Latiff	2022	ACTRN12617000135314	Malaysia	PCOS	Upper-middle-income	Ministry of Science, Technology, and Innovation (Malaysia)	85	Randomized controlled trial (single-blind)	Single-center university setting	Single-blind: statistician only	Structured education module: 8 nutrition sessions, 32 exercise sessions, motivation, stress management, sleep/rest education vs usual care pamphlet	Behavioral (knowledge, attitudes, practice), psychological (EAT-26, TFEQ), physical activity, anthropometric	Not used	23	62.2
135	The effects of vitamin D supplementation on metabolic profiles and gene expression of insulin and lipid metabolism in infertile polycystic ovary syndrome candidates for in vitro fertilization	Majid Dastorani, Esmat Aghadavod, Naghmeh Mirhosseini, Fatemeh Foroozanfard, Shahrzad Zadeh Modarres, Mehrnush Amiri Siavashani, Zatollah Asemi	2018	IRCT20170513033941N27	Iran	PCOS	Upper-middle-income	Vice-Chancellor for Research, Kashan University of Medical Sciences	40	Randomized double-blind placebo-controlled trial	Infertility research center and IVF clinic	Double-blind (participants, investigators, analysts)	Vitamin D 50,000 IU every other week for 8 weeks vs matched placebo	Metabolic, hormonal, molecular	Not reported	30	81.1
136	Weekly Osteopathic Manipulative Treatment to Improve Measures of Sympathetic Tone in Women With Polycystic Ovary Syndrome: A Randomized, Controlled Pilot Study	Sarah E. Davis, Jan Hendryx, Christian Menezes, Stephanie Bouwer, Heather Menezes, Vishesha Patel, Chevelta A. Bostick Smith, Diana L. Speelman	2020	NCT03383484	USA	PCOS	High-income	AOA Grant #181627705	25	Randomized controlled pilot trial	Single region; mixed clinical & academic settings	Data collectors blinded; participants not blinded → single-blind	Weekly OMT ×12 weeks: Chapman point manipulation + rib raising + paraspinal inhibition (heart, adrenal, ovarian segments) vs. no intervention	Physiologic (HR, BP, HRR, HRV); endocrine (free T, DHEA-S, A4); metabolic (glucose, insulin, HOMA-IR); clinical (mFG, cycle length); psychological (BAI, BDI-II)	Not reported	21	56.8
137	Perinatal Outcomes of Two Screening Strategies for Gestational Diabetes Mellitus: A Randomized Controlled Trial (GDM2)	Esa M. Davis, Kaleab Z. Abebe, Hyagriv N. Simhan, Patrick Catalano, Tina Costacou, Diane Comer, Steven Orris, Kathleen Ly, Alison Decker, Dara Mendez, Nancy Day, Christina M. Scifres	2021	NCT02309138	USA	GDM	High-income	NIH NICHD R01HD079647; Clinical & Translational Science Institute UL1TR001857	921	Single-centre parallel-group RCT	10 obstetric clinics linked to UPMC Magee Women’s Hospital	Participants and clinicians blinded to test method; statistician unblinded; OGTT staff blinded	Screening strategy: IADPSG 75g OGTT vs Carpenter–Coustan two-step strategy	Clinical maternal & neonatal outcomes	Not reported	33	89.2
138	RCT to evaluate the influence of adjuvant medical treatment of peritoneal endometriosis on the outcome of IVF	W. Decleer, K. Osmanagaoglu, K. Verschueren, F. Comhaire, P. Devroey	2016	EudraCT 2012-000784-25; NCT01682642	Belgium	Endometriosis	High-income	None (no external funding)	120	Randomized controlled trial (open-label)	Single IVF center (Ghent)	Open-label	3-month GnRH agonist (Zoladex 3.6 mg monthly ×3) → IVF vs immediate IVF (long protocol with buserelin)	IVF lab outcomes; clinical pregnancy	No	26	70.3
139	Emotion-focused therapy for women with premenstrual dysphoric disorder: a randomized clinical controlled trial	Saeideh Izadi Dehnavi, Seyede Salehe Mortazavi, Mohammad Arash Ramezani, Banafshe Gharraee, Ahmad Ashouri	2024	IRCT20220920055998N1	Iran	PMDD	Upper-middle-income	None (no funding)	48	Parallel-group RCT	Outpatient psychology clinic	Single-blind (assessors & analysts blinded); participants & therapist unblinded	16-week individual EFT sessions (Les Greenberg protocol) vs waitlist control	Psychological (PMDD severity, emotion regulation, depression, anxiety, stress)	Not used	28	75.7
140	Assessment of levator hiatal area using 3D/4D transperineal ultrasound in women with deep infiltrating endometriosis and superficial dyspareunia treated with pelvic floor muscle physiotherapy: randomized controlled trial	S. Del Forno, A. Arena, V. Pellizzone, J. Lenzi, D. Raimondo, L. Cocchi, R. Paradisi, A. Youssef, P. Casadio, R. Seracchioli	2021	NCT03572075	Italy	Endometriosis	High-income	Not reported	34	Randomized controlled trial (parallel-group)	Single-centre referral hospital	Sonographers assessing LHA blinded; participants unblinded	Pelvic floor physiotherapy: 5 sessions over 11 weeks vs no intervention	Clinical + sonographic outcomes	Not reported	24	64.9
141	Endocrine and Metabolic Effects of Rosiglitazone in Non-obese Women with Polycystic Ovary Disease	Didem Dereli, Tugrul Dereli, Firat Bayraktar, A. Gokhan Ozgen, Candeger Yilmaz	2005	Not reported	Turkey	PCOS	Upper-middle-income	Not reported	40	Randomized open-label two-arm trial	Single academic endocrine/metabolic center	Open-label	Rosiglitazone 2 mg/day vs 4 mg/day for 8 months	Clinical (ovulation, menses, hirsutism), endocrine (androgens, LH/FSH), metabolic (glucose, insulin, lipids)	No	17	45.9
142	The Effect of a Very-Low-Calorie Diet (VLCD) vs. a Moderate Energy Deficit Diet in Obese Women with Polycystic Ovary Syndrome (PCOS)-A Randomised Controlled Trial.	Deshmukh H; Papageorgiou M; Wells L; Akbar S; Strudwick T; Deshmukh K; Vitale SG; Rigby A; Vince RV; Reid M; Sathyapalan T	2023	ISRCTN36687466	UK	PCOS	High-income	H. Deshmukh funded by NIHR clinical lectureship Sponsor: Hull University Teaching Hospitals NHS Trust	40	Open-label randomised controlled trial (RCT)	Single centre, research Centre, Hull Royal Infirmary (UK)	Open-label (no blinding of participants or investigators)	VLCD (Very-Low-Calorie Diet) 800 kcal/day for 8 weeks (Cambridge Weight Plan meal replacements) Followed by gradual return to ~1600 kcal/day Moderate Energy Deficit Diet Person-specific calorie prescription Calculated using Henry equation + deficit of 600 kcal Dietetic guidance	Continuous outcomes (weight, FAI, hormones, metabolic markers, body composition)	not reported	29	78.4
143	Sitagliptin Decreases Visceral Fat and Blood Glucose in Women With Polycystic Ovarian Syndrome.	Devin JK; Nian H; Celedonio JE; Wright P; Brown NJ	2020	ClinicalTrials.gov NCT02122380	United States	PCOS	High-income	NIH grants (UL1 TR000445-06; DK059637; DK020593; K23HL11962; R01HL125426).	23	Double-blind, randomized, placebo-controlled, crossover trial (two 1-month periods, 8-week washout).	Single centre	Double-blind: participants and investigators blinded; matched placebo tablets used.	Sitagliptin 100 mg PO daily for 1 month vs matching placebo, crossover design. Includes extended OGTT, vascular testing, DEXA, overnight GH sampling every 10 minutes.	GH secretion profile; glucose metabolism; VAT via DEXA; vascular function; lipids; inflammatory markers; GLP-1/PYY; PCOSQ QOL scores.	NR	27	73
144	Impact of the Individual Counseling Program for Polycystic Ovary Syndrome Management Among University Students: A Prospective Randomized Controlled Trial	O. Dilek, U.A. Senay, C. Fatih	2022	NCT04471012	Turkey	PCOS	Upper-middle-income	None (no external funding)	67	Prospective randomized controlled trial	University health sciences faculties (screening) + gynecology clinic (diagnosis and follow-up)	No blinding possible (behavioral intervention)	Intervention: TM-based individual counseling + motivational interviewing + personalized diet plan (1500–1600 kcal/day), physical activity counseling, PCOS education booklet; monthly sessions for 6 months. Control: Routine monthly health checks + general advice only; booklet provided after study.	Clinical (anthropometrics, menstrual cycle, hirsutism), behavioral (IPAQ), psychological symptoms (unease, irritability, anger, anxiety, fatigue)	No	22	59.5
145	Efficacy of WeChat-Based Digital Intervention Versus Metformin in Women With Polycystic Ovary Syndrome: Randomized Controlled Trial.	Dilimulati D; Shao X; Wang L; Cai M; Zhang Y; Lu J; Wang Y; Liu H; Kuang M; Chen H; Zhang M; Qu S	2024	NCT05386706	China	PCOS	Upper-middle-income	Shanghai Tenth People’s Hospital Funding (YNCR2C013) National Natural Science Foundation of China (81601269, 82170861, 82103713, 81970677) SHDC Clinical Research Plan (SHDC2020CR1017B) Partial funding by Hangzhou Kang Ming Information Technology Co, Ltd WeChat mini program provided by Shanghai Zoey Information Technology Co, Ltd	80	Randomized controlled trial	single centre	Participants not blinded	Digital 12-week WeChat-based self-management program vs 1000 mg/day metformin for 12 weeks	Primary: HOMA-IR; Secondary: anthropometry, glucose metabolism, lipid metabolism, liver function, sex hormones, body composition, psychological and behavioral outcomes, physical activity, satisfaction	Not reported	31	83.8
146	MaFOS-GDM Trial: Maternal fish oil supplementation in women with gestational diabetes and cord blood DNA methylation at IGF-1 gene	Dilek Dilli, Nazan Neslihan Dogan, Mehmet Şah İpek, Yunus Çavuş, Serdar Ceylaner, Haldun Dogan, Arzu Dursun, Tuncay Küçükozkan, Ayşegül Zenciroglu	2018	NCT02371343	Turkey	GDM	Upper-middle-income	Republic of Turkey Ministry of Health General Directorate for Health Research	120	Randomised controlled trial	Multicentre (3 tertiary maternity hospitals in Turkey)	Double-blind (participants and study team unaware)	Fish oil capsule (EPA 384 mg, DHA 252 mg/day) vs placebo sunflower oil capsule	Metabolic, epigenetic, neonatal outcomes	Not reported	28	75.7
147	Serum metabolomic profiling reveals potential biomarkers in assessing the management of women with polycystic ovary syndrome: a randomized controlled trial	Xuesong Ding, Yan Deng, Yanfang Wang, Wei Xue, Shiyang Zhu, Xiao Ma, Ruilin Ma, Aijun Sun	2022	NCT03264638	China	PCOS	Upper-middle-income	Not reported	117	Prospective open-label parallel RCT	Single academic tertiary center (PUMCH, Beijing)	Open-label	Dingkundan vs Diane-35 vs Dingkundan + Diane-35 (21 days on, 7 days off × 3 cycles)	Clinical (testosterone, glucose/insulin, lipids) + metabolomic (LC-MS/MS)	Not used	20	54.1
148	Acupuncture as an alternative treatment for polycystic ovary syndrome: Effects on ovulation rate, pregnancy rate and endometrial receptivity	Mengdi Ding, Xueying Zhu, Yuxiao Huang, Zilong Tan, Xiaotong Zhu, Shuoshuo Han, Jianwu Shen, Ran Luo	2025	ChiCTR2200061807	China	PCOS	Upper-middle-income	Science & Technology Innovation Project of Chinese Academy of TCM (2021A02412)	134	Randomized, single-blind, sham-controlled RCT	Single centre (Xiyuan Hospital, Beijing)	Single-blind (participants/some assessors); practitioners unblinded	Letrozole + true acupuncture vs letrozole + sham (Streitberger) acupuncture; 2×/week up to 3 cycles	Clinical (ovulation & pregnancy), hormonal, ultrasound-based receptivity	No	30	81.1
149	Comparison of spironolactone and spironolactone plus metformin in the treatment of polycystic ovary syndrome	Halit Diri; Sulbiye Karaburgu; Banu Acmaz; Kursad Unluhizarci; Fatih Tanriverdi; Zuleyha Karaca; Fahrettin Kelestimur	2016	Not reported	Turkey	PCOS	Upper-middle-income	Not reported	37	Prospective randomized controlled trial	University endocrinology outpatient clinic	Open-label (assessor for FGS blinded)	Spironolactone 100 mg/day vs spironolactone 100 mg/day + metformin 2000 mg/day for 12 months	Hormonal, metabolic, clinical	Not reported	18	48.6
150	Hormonal add-back therapy for females treated with gonadotropin-releasing hormone agonist for endometriosis: A randomized controlled trial	Amy D. DiVasta; Henry A. Feldman; Jenny S. Gallagher; Natalie A. Stokes; Marc R. Laufer; Mark D. Hornstein; Catherine M. Gordon	2015	ClinicalTrials.gov NCT00474851	United States	Endometriosis	High-income	NICHD; NIH CTSA Harvard; McCarthy Family Foundation; Thrasher Research Fund; Boston Children’s Hospital; study drugs donated by Abbott, Duramed & Wyeth	53	Randomized double-blind placebo-controlled trial	Single tertiary academic children’s hospital	Double-blind (participants, clinicians, investigators)	GnRHa (leuprolide depot q3mo) plus add-back: norethindrone acetate 5 mg/day + conjugated equine estrogens 0.625 mg/day vs norethindrone acetate + placebo for 12 months	Skeletal, pain, QoL, safety	Not reported	33	89.2
151	Laparoscopic natural orifice specimen extraction colectomy versus conventional laparoscopic colorectal resection in patients with rectal endometriosis: a randomized, controlled trial	Noémi Dobó; Gabriella Márki; Gernot Hudelist; Noémi Csibi; Réka Brubel; Nándor Ács; Attila Bokor	2023	ClinicalTrials.gov NCT04109378	Hungary	Endometriosis	High-income	None reported	91	Prospective randomized controlled trial (parallel, open-label)	Single university hospital	No blinding (not feasible)	NOSE colectomy vs conventional nerve- and vessel-sparing laparoscopic colorectal resection	Functional, pain, QoL, fertility, safety	Not reported	29	78.4
152	Is there a value for probiotic supplements in gestational diabetes mellitus? A randomized clinical trial	Neda Dolatkhah, Majid Hajifaraji, Fatemeh Abbasalizadeh, Naser Aghamohammadzadeh, Yadollah Mehrabi, Mehran Mesgari Abbasi	2015	IRCT201405181597N3	Iran	GDM	Upper-middle-income	Tehran Darou Pharmaceuticals (provided probiotic capsules); supported by Shahid Beheshti University of Medical Sciences	64	Double-blind, placebo-controlled randomized clinical trial	Single-centre (Alzahra University Hospital, Tabriz)	Double-blind (participants, clinicians, analysts)	Probiotic capsule (4 × 10⁹ CFU): Lactobacillus acidophilus LA-5, Bifidobacterium BB-12, Streptococcus thermophilus STY-31, L. delbrueckii bulgaricus LBY-27; 1 capsule/day × 8 weeks vs placebo	Clinical, biochemical	Not reported	26	70.3
153	Gonadotropin-releasing hormone antagonist and metformin for treatment of polycystic ovary syndrome patients undergoing in vitro fertilization–embryo transfer	Nicola Doldi; Paola Persico; Francesca Di Sebastiano; Elena Marsiglio; Augusto Ferrari	2006	Not reported	Italy	PCOS	High-income	Not reported	40	Parallel randomized controlled trial	Single university IVF unit	Open-label	Metformin 1.5 g/day for 2 months + rFSH + GnRH antagonist vs rFSH + GnRH antagonist alone	Reproductive, stimulation safety	Not reported	15	40.5
154	Effect of Low-Frequency Electro-Acupuncture in Unmarried Women With Polycystic Ovary Syndrome: A Randomized Controlled Study.	Dong H; Wang Q; Cheng L; Wang Z; Wu X; Zhou Z; Yang L; Huang D	2022	ChiCTR-TRC-12002529	United states	PCOS	High-income	not reported	15	Randomized, placebo-controlled clinical trial (pilot study)	Single-center (Columbia University, New York)	Double-blind (participants + study staff blinded)	Cinnamon extract 333 mg capsule, TID for 8 weeks	Placebo capsule, TID for 8 weeks "Clinical + biochemical:Insulin resistance indices (HOMA-IR, QUICKI, Matsuda index) • Fasting glucose • OGTT glucose/insulin AUC"	not applicable	34	91.9
155	Treatment of endometriosis-associated pain with linzagolix, an oral GnRH antagonist: a randomized clinical trial	Jacques Donnez, Hugh S. Taylor, Robert N. Taylor, Mark D. Akin, Tatyana F. Tatarchuk, Krzysztof Wilk, Jean-Pierre Gotteland, Veronique Lecomte, Elke Bestel	2020	NCT02778399	USA + Europe (multinational)	Endometriosis	High-income	ObsEva S.A (industry-sponsored)	328	Multinational, multicenter, parallel-group RCT	62 clinical centers	Double-blind (participants, investigators, sponsor)	Linzagolix 50 mg, 75 mg, 100 mg, 200 mg daily vs placebo	Clinical (pain), biochemical (estradiol), functional (QoL), safety (BMD, labs)	Not reported	36	97.3
156	Linzagolix therapy versus placebo in patients with endometriosis-associated pain: a prospective, randomized, double-blind, Phase 3 study (EDELWEISS 3)	Jacques Donnez, Christian Becker, Hugh Taylor, Francisco Carmona Herrera, Olivier Donnez, Andrew Horne, Maciej Paszkowski, Felice Petraglia, Stefan Renner, Amisha Patel, Mitra Boolell, Elke Bestel, Marie-Madeleine Dolmans	2024	NCT03992846	Multinational (USA + 11 European countries)	Endometriosis	High-income	ObsEva (sponsor); additional support from Theramex & Kissei; FNRS grant 5/4/150/5	486	Phase 3, multicenter, randomized, double-blind, placebo-controlled, double-dummy	91 clinical centers (USA n=26; Europe n=65)	Double-blind, double-dummy	Daily oral linzagolix 75 mg; linzagolix 200 mg + ABT (estradiol 1 mg + norethindrone acetate 0.5 mg); vs placebo	Pain (dysmenorrhea, non-menstrual pelvic pain), functioning, QoL, bleeding days, BMD, safety	No	24	64.9
157	Randomized Face-to-Face vs. Home Exercise Interventions in Pregnant Women with Gestational Diabetes	Danielle Symons Downs, Jennifer M. DiNallo, Leann L. Birch, Ian M. Paul, Jan S. Ulbrecht	2017	Not reported	USA	GDM	High-income	NIH NIDDK grant DK075867-02	65	3-arm randomized controlled trial	Single-center research clinic + community exercise site	None (open-label)	F2F supervised structured exercise 2×/week vs Home phone-based exercise support vs Standard care	Behavioral + metabolic outcomes	No	26	70.3
158	Impact of an educational DVD on anxiety and glycaemic control in women diagnosed with gestational diabetes mellitus (GDM): a randomised controlled trial	Claire R. Draffin, Fiona A. Alderdice, David R.M. McCance, Michael Maresh, Roy Harper, Christopher C. Patterson, Giovanna Bernatavicius, Sarah F. Brennan, Aisling Gough, Oonagh McSorley, Valerie A. Holmes (on behalf of the GDM DVD study group)	2017	ISRCTN6268558	United Kingdom (Northern Ireland & England)	GDM	High-income	BRIDGES Grant from International Diabetes Federation (educational grant from Lilly Diabetes)	150	Parallel, multicentre, randomised controlled trial	Multicentre (three UK hospitals: Belfast, Manchester, Dundonald)	Non-blinded (researcher aware; self-completed outcomes)	Educational DVD added to usual care	Patient-reported (psychological) and clinical (glycaemic)	Not reported	31	83.8
159	The effect of alfacalcidiol and metformin on phenotype manifestations in women with polycystic ovary syndrome - a preliminary study.	DraveckÃ¡ I; FigurovÃ¡ J; JavorskÃ½ M; PetrÃ­kovÃ¡ J; VaÄ¾kovÃ¡ M; LazÃºrovÃ¡ I	2016	not reported	Slovakia	PCOS	High-income	not reported	39	Randomized controlled trial, preliminary study	University hospital (First Department of Internal Medicine, P. J. Šafarik University, Košice)	Open-label (no blinding reported)	Group 1: Alfacalcidiol 1 µg/day (VIT D) Group 2: Alfacalcidiol 1 µg/day + Metformin 1700–2550 mg/day (VIT D+MET) Group 3: Metformin 1700–2550 mg/day (MET)	Biochemical (TST, fTST, DHEAS, LH, LH/FSH ratio, SHBG, FAI), Clinical (menstrual cycle regularity, hirsutism, acne), Fertility (pregnancy rate)	not specified	19	51.4
160	Randomized trial of leuprolide versus continuous oral contraceptives in the treatment of endometriosis-associated pelvic pain	Guzick D.S., Huang L-S., Broadman B.A., Nealon M., Hornstein M.D.	2011	None reported	USA	Endometriosis	High-income	NIH grants R01HD044870, UL1RR024160	47	Prospective randomized double-blind controlled trial	Two academic medical centers (Rochester NY, Boston MA)	Double-blind (participants, clinicians, assessors); both oral and injectable treatments masked	Depot leuprolide 11.25 mg IM q12 weeks + norethindrone acetate 5 mg/day vs continuous OCs (norethindrone 1 mg + ethinyl estradiol 35 μg daily) × 48 weeks	Clinical (pain: B&B, NRS), psychological (BDI), sexual function (ISS)	Not reported	25	67.6
161	Simvastatin improves biochemical parameters in women with polycystic ovary syndrome: results of a prospective, randomized trial	Antoni J. Duleba, Beata Banaszewska, Robert Z. Spaczynski, Leszek Pawelczyk	2006	Not reported	Poland	PCOS	High-income	NIH grant R01 HD40207; simvastatin donated by Polfa; OCP donated by Organon Polska	48	Prospective randomized controlled trial	Academic medical center (Poznan University)	No blinding (open-label; drugs distinguishable)	Group 1: Simvastatin 20 mg daily + OCP (20 μg EE + 150 μg desogestrel). Group 2: OCP alone. Duration 12 weeks.	Endocrine (T, DHEAS, LH, FSH, SHBG), metabolic (insulin, glucose AUC, QUICKI), lipid profile, clinical (hirsutism)	Not used	24	64.9
162	Effect of low-dose flutamide on abdominal adipogenic function in normal-weight women with polycystic ovary syndrome: a randomized clinical trial	Daniel A. Dumesic; Chloe Winnett; Gwyneth Lu; Tristan R. Grogan; David H. Abbott; Rajanigandha Naik; Gregorio D. Chazenbalk	2023	ClinicalTrials.gov NCT01889199	USA	PCOS	High-income	NIH (NICHD P50HD071836; NIH CTSI UL1TR001881); Santa Monica Bay Woman’s Club	12	Randomized, double-blind, placebo-controlled clinical trial	Academic medical center (UCLA)	Double-blind (participants and investigators)	Flutamide 125 mg/day orally vs identical placebo for 6 months	Metabolic, mechanistic	Not reported	22	59.5
163	Evaluation of pretreatment with Cetrotide in an antagonist protocol for patients with PCOS undergoing IVF/ICSI cycles: a randomized clinical trial.	Eftekhar M; Bagheri RB; Neghab N; Hosseinisadat R	2018	not reported	Iran	PCOS	Upper-middle-income	Yazd Research and Clinical Center for Infertility, Shahid Sadoughi University of Medical Sciences (grant 3906)	88	Randomized clinical trial	Single centre (Yazd Research and Clinical Center for Infertility)	Blinded outcome assessment for oocyte retrieval	GnRH antagonist pretreatment for 3 days vs conventional antagonist protocol	Number of COCs, MII oocytes, 2PN oocytes, fertilization, implantation, pregnancy rates, OHSS	not reported	21	56.8
164	Progesterone-primed ovarian stimulation in polycystic ovarian syndrome: An RCT	Maryam Eftekhar, Masrooreh Hoseini, Lida Saeed	2019	IRCT20110509006420N18	Iran	PCOS	Upper-middle-income	Research & Clinical Center for Infertility, Yazd	120	Randomized controlled trial	Single infertility centre	Open-label	PPOS (dydrogesterone 20 mg/day + FSH) vs Conventional GnRH antagonist protocol	Embryology, hormonal, and pregnancy outcomes	No	23	62.2
165	Can the CANKADO online application improve quality of life monitoring via the endometriosis health profile-30 in endometriosis patients: A randomized cohort study on acceptance, usability, and correlations with demographics and media usage.	Ehmann L; JÃ¤ger M; Folger L; SchinkÃ¶the T; Beyer S; SchrÃ¶der L; Mahner S; Kolben T	2025	NR	Germany	Endometriosis	High-income	NR	60	Randomized cohort study with parallel comparison of paper-based vs online interrogation modalities.	Single academic tertiary referral center.	Double-blind randomization at allocation stage; no blinding during intervention due to modality differences.	Online-based EHP-30 via CANKADO application vs paper-based EHP-30 questionnaire; repeated HRQoL and evaluation assessments at multiple time points.	Patient-reported outcomes: acceptance, usability, perceived burden, suitability, completion time; HRQoL measured by EHP-30.	NR	19	51.4
166	Effect of aerobic exercise on inflammatory markers in polycystic ovary syndrome: a randomized controlled trial	A.M. Elbandrawy, A.M. Yousef, E.N. Morgan, N.F. Ewais, M.M. Eid, S.M. Elkholi, W.K. Abdelbasset	2022	NCT05233514	Egypt & Saudi Arabia (collaborating institutions)	PCOS	Mixed Income	Princess Nourah Bint Abdulrahman University Researchers Supporting Project PNURSP2022R145	40	Randomized controlled trial (parallel)	Single outpatient gynecology clinic (Kasr Al-Aini University Hospital, Egypt)	Assessor-blinded only (participants not blinded)	Aerobic exercise 3×/week ×12 weeks + metformin 1500 mg/day vs metformin 1500 mg/day only	Clinical biochemical (inflammatory markers IL-6, TNF-α, CRP)	Not reported	22	59.5
167	Effect of Yoga Training and High Probiotic Food Supplements on Insulin-Resistance in Polycystic-Ovarian-Syndrome: A Randomized Controlled Trial	Mai M. ElBanna, Dalia M. Kamel, Ahmed Shaaban, Afaf M. Botla, Reham E. Hamoda	2024	PACTR202211578683612	Egypt	PCOS	Lower-middle-income	None	52	Parallel two-arm RCT	Single university hospital outpatient clinic	Participants unblinded; outcome assessors not reported as blinded	Group A: Mediterranean diet rich in probiotics + 1h daily yoga; Group B: yoga only	Clinical (FBG, HOMA-IR, insulin); anthropometric	None reported	24	64.9
168	Optimized letrozole dose versus traditional use of clomiphene citrate for ovulation induction in patients with PCOS: a prospective randomized controlled trial	Reham R. Elkhateeb, Ahmad Mahran	2016	Not reported	Egypt	PCOS	Lower-middle-income	None reported	200	Parallel RCT	Single IVF hospital unit	Unblinded to participants/providers; outcome assessors not described as blinded	Step-up letrozole 2.5→10 mg days 3–6 vs clomiphene citrate 100 mg days 3–7; up to 3 cycles	Clinical (pregnancy, ovulation), hormonal, ultrasound	None reported	19	51.4
169	A randomized controlled trial of clomifene citrate, metformin, and pioglitazone versus letrozole, metformin, and pioglitazone for clomifene-citrate-resistant polycystic ovary syndrome	Waleed El-khayat, Ghada Abdel Moety, Maged Al Mohammady, Dalia Hamed	2016	NCT01909141	Egypt	PCOS	Lower-middle-income	Not reported	100	Double-blind RCT	Single university teaching hospital	Double-blind (participants, staff, analysts)	Group A: CC 100 mg ×5 days + metformin 850 mg + pioglitazone 15 mg ×10 days; Group B: letrozole 5 mg ×5 days + same metformin/pioglitazone	Ovulation & pregnancy	Not reported	26	70.3
170	Short-term therapy with combination dipeptidyl peptidase-4 inhibitor saxagliptin/metformin extended release (XR) is superior to saxagliptin or metformin XR monotherapy in prediabetic women with PCOS: a single-blind, randomized, pilot study	Elkind-Hirsch K.E., Paterson M.S., Seidemann E.L., Gutowski H.C.	2017	NCT02022007	USA	PCOS	High-income	AstraZeneca Pharmaceuticals (investigator-initiated grant)	38	Single-blind RCT (investigator blinded)	Single centre (Woman’s Hospital Outpatient Metabolic Clinic, Louisiana)	Single-blind (investigator blinded; participants unblinded via pill characteristics but bag-masked)	MET XR 2000 mg daily vs SAXA 5 mg daily vs SAXA-MET XR (5 mg/2000 mg) daily for 16 weeks	Clinical, metabolic, hormonal, anthropometric	No	24	64.9
171	A randomized trial of dapagliflozin and metformin, alone and combined, in overweight women after gestational diabetes mellitus	Karen E. Elkind-Hirsch, Ericka Seidemann, Renee Harris	2020	NCT02338193	USA	GDM	High-income	AstraZeneca Pharmaceuticals (investigator-initiated grant)	66	Randomized controlled trial	Single-centre (Women’s Hospital Metabolic Clinic, Louisiana)	Single-blind (investigator/clinical staff blinded; participants unblinded)	Dapagliflozin vs metformin vs dapagliflozin+metformin for 24 weeks	Metabolic, anthropometric, cardiometabolic	Not reported	29	78.4
172	Liraglutide 3 mg on weight, body composition, and hormonal and metabolic parameters in women with obesity and polycystic ovary syndrome: a randomized placebo-controlled phase 3 study	Karen E. Elkind-Hirsch, Neil Chappell, Donna Shaler, John Storment, Drake Bellanger	2022	NCT03480022	USA	PCOS	High-income	Novo Nordisk (investigator-initiated grant)	82	Randomized, double-blind, placebo-controlled phase 3 RCT	Hospital-based endocrine & metabolic center	Double-blind (participants, investigators, outcomes assessors)	Liraglutide 3 mg SC daily + lifestyle intervention vs placebo + lifestyle	Clinical (weight, hormones, metabolic endpoints), behavioral (menses)	None reported	30	81.1
173	Randomized controlled trial of the effects of metformin versus combined oral contraceptives in adolescent PCOS women through a 24-month follow-up period	H.A. El Maghraby, T. Nafee, D. Guiziry, A. Elnashar	2015	Not reported	Egypt	PCOS	Lower-middle-income	Not reported	119	Randomized controlled trial	Alexandria IVF/ICSI Centre	Unblinded	Group A: metformin 1700 mg/day; Group B: COC (30 μg EE + 15 mg progestin); Group C: no treatment	Clinical (cycle regularity, hirsutism), metabolic	Not reported	27	73
174	Efficacy of dienogest vs combined oral contraceptive on pain associated with endometriosis: Randomized clinical trial	Lina El Taha, Antoine Abu Musa, Dalia Khalifeh, Ali Khalil, Sehrish Abbasi, Joseph Nassif	2021	NCT04256200	Lebanon	Endometriosis	Upper-middle-income	American University of Beirut Medical Practice Plan	70	Randomized controlled trial (double-blind)	Single-centre (AUBMC)	Double-blind (participants + investigators)	Dienogest 2 mg/day vs Yasmin (30 μg EE/3 mg drospirenone) continuously for 24 weeks	Pain, HRQoL, adverse effects	Not reported	28	75.7
175	Melatonin and sleep parameters in infertile women with endometriosis: first results from the triple-blind randomized controlled trial of administration of melatonin in chronic pelvic pain and sleep disturbance	Sedighe Esmaeilzadeh, Fatemeh Habibolahi, David Moher, Zahra Basirat, Hemat Gholinia, Masoumeh Golsorkhtabaramiri, Parvaneh Mirabi	2025	IRCT20171209037794N4	Iran	Endometriosis	Upper-middle-income	Vice-Chancellor for Research & Technology, Babol University of Medical Sciences (Grant 724134790)	80	Triple-blind, parallel-group randomized placebo-controlled RCT	Single infertility referral center (Fatemezahra Infertility Center, Babol University)	Triple-blind (participants, clinicians, pharmacists/statisticians)	Melatonin 5 mg prolonged-release nightly × 2 months vs identical placebo; analgesics allowed PRN but recorded	Patient-reported outcomes: sleep quality (PSQI), pelvic pain (VAS), adherence, analgesic use	No	31	83.8
176	Effect of combined metformin and oral contraceptive therapy on metabolic factors and endothelial function in overweight and obese women with polycystic ovary syndrome	Paulina A. Essah, James A. Arrowood, Kai I. Cheang, Swati S. Adawadkar, Dale W. Stovall, John E. Nestler	2011	NCT00682890	United States	PCOS	High-income	NIH grants R03HD047298, K23HD049454, K24HD40237; Clinical Research Center Grant M01-RR00065	23	Randomized double-blind placebo-controlled trial	Single academic medical center	Double-blind (participants and investigators)	Metformin 500 mg TID + ethinyl estradiol/norgestimate OC vs OC + matched placebo for 3 months	Metabolic, vascular, hormonal	Not reported	25	67.6
177	N-acetylcysteine supplementation improves endocrine-metabolism profiles and ovulation induction efficacy in polycystic ovary syndrome.	Fang YQ; Ding H; Li T; Zhao XJ; Luo D; Liu Y; Li Y	2024	ChiCTR2300077709	China	PCOS	Upper-middle-income	Hubei Provincial Natural Science Foundation of China	230	Pragmatic, randomized, parallel-controlled clinical trial	3 centres	Open-label pragmatic design; clinical outcomes assessed	NAC 1.8 g/day combined with sequential LE/uFSH for ovulation induction	Clinical pregnancy rate per OI cycle, cumulative clinical pregnancy rate, ovulation rate, embryo quality, oxidative stress markers, implantation rate	Not reported	29	78.4
178	Effect of self-care counselling on depression and anxiety in women with endometriosis: a randomized controlled trial	Nooshin Farshi, Shirin Hasanpour, Mojgan Mirghafourvand, Khalil Esmaeilpour	2020	IRCT20111219008459N13	Iran	Endometriosis	Upper-middle-income	Tabriz University of Medical Sciences (Grant 61669)	76	Parallel-group RCT	Single tertiary center (Al-Zahra Teaching & Treatment Center, Tabriz)	Single-blind (outcome assessor blinded)	Seven 60–90 min weekly self-care counselling sessions vs routine care	Psychological (anxiety, depression), QoL	Not used	27	73
179	Role of vitamin E and D3 supplementation in ICSI outcomes of women with polycystic ovarian syndrome: A double-blinded randomized placebo-controlled trial	Farnaz Fatemi et al.	2017	IRCT2014081018662N1	Iran	PCOS	Upper-middle-income	Avicenna Research Institute (ACECR)	105	Double-blind RCT	Single centre	Double-blind (participants, investigators, assessors)	Vitamin E 400 mg/day + Vitamin D3 50,000 IU/2 weeks	Clinical & biochemical	No	26	70.3
180	Flexible treatment of gestational diabetes mellitus adjusted according to intrauterine fetal growth versus treatment according to strict maternal glycemic parameters: a randomized clinical trial	Manuela Fernández-López, José Eliseo Blanco-Carnero, Juan Manuel Guardia-Baena, Catalina de Paco-Matallana, Aurora Aragón-Alonso, Antonio Miguel Hernández-Martínez	2022	Not registered	Spain	GDM	High-income	No external grant declared	260	Parallel randomized controlled trial	Single-centre (Hospital Clínico Universitario Virgen de la Arrixaca)	Partial blinding: endocrinologists unblinded; obstetricians, midwives, neonatologists blinded	FC: glycemic targets based on fetal abdominal circumference percentile; MC: standard maternal glycemic targets	Clinical, perinatal, metabolic	Not used	28	75.7
181	A Pregnancy and Postpartum Lifestyle Intervention in Women With Gestational Diabetes Mellitus Reduces Diabetes Risk Factors: A Feasibility Randomized Controlled Trial	Ferrara A; Hedderson MM; Albright CL; Ehrlich SF; Quesenberry CP; Peng T; Feng J; Ching J; Crites Y	2011	NCT00460018	USA	GDM	High-income	NIH NIDDK R18-DK067334; Kaiser Garfield Foundation	197	Randomized controlled trial	Single centre (Kaiser Permanente Northern California)	Non-blinded participants; outcome assessors blinded	Telephone-based DPP-style diet + exercise + breastfeeding support intervention vs usual care	Weight, diet, physical activity, breastfeeding, diabetes risk factors	Not reported	29	78.4
182	A pragmatic cluster randomized clinical trial of diabetes prevention strategies for women with gestational diabetes: design and rationale of the Gestational Diabetes’ Effects on Moms (GEM) study	Assiamira Ferrara, Monique M. Hedderson, Cheryl L. Albright, Susan D. Brown, Samantha F. Ehrlich, Bette J. Caan, Barbara Sternfeld, Nancy P. Gordon, Julie A. Schmittdiel, Erica P. Gunderson, Ashley A. Mevi, Ai-Lin Tsai, Jenny Ching, Yvonne Crites, Charles P. Quesenberry Jr.	2014	ClinicalTrials.gov NCT01344278	United States	GDM	High-income	Agency for Healthcare Research and Quality (AHRQ R01 HS019367); NIH (P30 DK092924)	2320	Pragmatic cluster RCT	Multicentre (44 medical facilities, Kaiser Permanente Northern California)	Investigators, data collectors, and providers blinded	“Getting in Balance” DPP-based print/telephone lifestyle program (13 postpartum sessions, bilingual delivery, tailored to GDM women) vs. usual care (print materials only)	Clinical and behavioral	Not reported	31	83.8
183	The Comparative Effectiveness of Diabetes Prevention Strategies to Reduce Postpartum Weight Retention in Women With Gestational Diabetes Mellitus (GEM Trial)	Assiamira Ferrara; Monique Hedderson; Susan Brown; Cheryl Albright; Samantha Ehrlich; Ai-Lin Tsai; Bette Caan; Barbara Sternfeld; Nancy Gordon; Julie Schmittdiel; Erica Gunderson; Ashley Mevi; William Herman; Jenny Ching; Yvonne Crites; Charles Quesenberry	2016	NCT01344278	USA	GDM	High-income	AHRQ R01-HS-019367; NIDDK R18-DK-067334; additional NIDDK support	2280	Cluster randomized controlled trial	44 medical facilities (integrated health system)	Health-system mailed guidance vs. mailed + DPP-based telephone coaching (13 sessions)	Postpartum weight retention; meeting weight goals; physical activity; diet; metabolic outcomes	Baseline (pregnancy), 6 wks, 6 mths, 12 mths postpartum	GEE logistic regression; mixed models; Cox regression; SAS 9.3	34	91.9
184	Letrozole and norethisterone acetate versus letrozole and triptorelin in the treatment of endometriosis related pain symptoms: a randomized controlled trial.	Ferrero S; Venturini PL; Gillott DJ; Remorgida V	2011	NR	Italy	Endometriosis	High-income	NR	35	Prospective, randomized, open-label, parallel-group controlled trial.	Single academic center	None (open-label due to different administration routes).	Common treatment: Letrozole 2.5 mg/day + calcium 1000 mg/day + vitamin D3 880 IU/day for 6 months. Group N: Oral norethisterone acetate 2.5 mg/day. Group T: Triptorelin 11.25 mg IM every 3 months.	Patient-reported pain outcomes (VAS, multidimensional categorical scale), imaging outcome (nodule volume), safety outcomes (AEs, BMD).	NR	23	62.2
185	Effect of diaphragmatic breathing exercise on psychological parameters in gestational diabetes: A randomised controlled trial	Gamze Fiskin, Nevin Hotun Sahin	2018	Not reported	Turkey	GDM	Upper-middle-income	None declared	60	Randomised controlled trial	Single-centre (Istanbul University)	Unblinded	Diaphragmatic breathing exercise daily × 30 days vs control (routine care & conversational visits)	Psychological / behavioural	Not stated	21	56.8
186	Metformin reduces serum mullerian-inhibiting substance levels in women with polycystic ovary syndrome after protracted treatment.	Fleming R; Harborne L; MacLaughlin DT; Ling D; Norman J; Sattar N; Seifer DB	2005	not reported	USA	PCOS	High-income	Grant from the Chief Scientist Office of the Scottish Executive (CZG/4/1/47)	82	Prospective treatment with randomization to two metformin doses	single centre	None for treatment dose (patients were aware of dose)	Metformin 500 mg TID or 850 mg TID for 8 months	Clinical (menstrual frequency, BMI), biochemical (MIS, A, DHEAS, T, inhibin-B, leptin, VEGF, fasting insulin, HOMA-IR), ultrasound (ovarian volume, total follicle number)	not reported	17	45.9
187	Effects of Pelvic Floor Muscle Physiotherapy on Urinary, Bowel, and Sexual Functions in Women with Deep Infiltrating Endometriosis: A Randomized Controlled Trial.	Del Forno S; Cocchi L; Arena A; Pellizzone V; Lenzi J; Raffone A; Borghese G; Paradisi R; Youssef A; Casadio P; Raimondo D; Seracchioli R	2023	NCT03572075	Italy	Endometriosis	High-income	not funded	30	Randomized controlled trial (three-arm parallel design)	Tertiary referral center	Outcome assessors blinded; physiotherapist not blinded	Pelvic floor physiotherapy: 5 individual 30-min sessions at weeks 1, 3, 5, 8, 11; Thiele massage and digital stretching; control group received standard care	Urinary function (BFLUTS), bowel function (KESS), sexual function (FSFI), levator hiatal area (LHA), RED/STC constipation types	not reported	26	70.3
188	Randomized Controlled Trial of Neurokinin 3 Receptor Antagonist Fezolinetant for Treatment of Polycystic Ovary Syndrome	Graeme L. Fraser, Barbara Obermayer-Pietsch, Joop Laven, Georg Griesinger, Axelle Pintiaux, Dirk Timmerman, Bart C.J.M. Fauser, Christopher Lademacher, Jean Combalbert, Hamid R. Hoveyda, Steven Ramael	2021	EudraCT 2014-004409-34	Austria, Belgium, Georgia, Germany, Netherlands	PCOS	High-income	Sponsored by OGEDA SA (subsidiary of Astellas Pharma Inc.)	73	Phase 2a randomized double-blind placebo-controlled trial	Multicenter academic and hospital-based clinics	Double-blind (participants and investigators)	Fezolinetant 60 mg/day or 180 mg/day orally vs placebo for 12 weeks	Hormonal, clinical, safety	Not reported	30	81.1
189	Effect of liraglutide on ectopic fat in polycystic ovary syndrome: A randomized clinical trial	Signe Frøssing, Malin Nylander, Elizaveta Chabanova, Jan Frystyk, Jens J. Holst, Caroline Kistorp, Sven O. Skouby, Jens Faber	2018	NCT02073929	Denmark	PCOS	High-income	Herlev Gentofte Hospital Research Foundation; Department of Internal Medicine; unrestricted grant + study medication from Novo Nordisk	72	Double-blind placebo-controlled RCT	Single university hospital (Herlev Gentofte Hospital)	Double-blind (participants, clinicians, assessors)	Liraglutide 1.8 mg daily for 26 weeks vs placebo	Clinical, metabolic, hormonal, imaging (MRI, MR spectroscopy)	None reported	29	78.4
190	Comparison of effects of drospirenone plus ethinyl estradiol alone or combined with metformin or cyproterone acetate on metabolic cardiovascular risk factors in nonobese women with polycystic ovary syndrome	Franca Fruzzetti; Daria Perini; Veronica Lazzarini; Donatella Parrini; Marco Gambacciani; Andrea Riccardo Genazzani	2010	Not reported	Italy	PCOS	High-income	Not reported	48	Randomized, open-label, parallel-group RCT	Academic outpatient reproductive endocrinology clinic	Open-label	DRP 3 mg + EE 20 µg alone vs + metformin 1,500 mg/day vs + cyproterone acetate 12.5 mg/day (10 days/cycle) for 6 months	Metabolic, hormonal	Not reported	22	59.5
191	Supervised exercise and pelvic floor muscle training eases current pelvic and genital pain but not worst pelvic and genital pain in women with endometriosis: a randomised trial.	Gabrielsen R; Tellum T; BÃ¸ K; Engh ME; Frawley H; NedregÃ¥rd Tveito S; Tennfjord MK	2025	not reported	Norway	Endometriosis	High-income	Norwegian Fund for Post-Graduate Training in Physiotherapy (Grant 139512)	81	Randomised controlled trial	Akershus University Hospital	Blinded assessors for PFM assessment	Supervised group + individual exercise training including pelvic floor muscle training (PFMT)	Continuous and categorical outcomes (pain, HSCL-5, KESS, PFM function)	No	33	89.2
192	Supervised exercise and pelvic floor muscle training eases current pelvic and genital pain but not worst pelvic and genital pain in women with endometriosis: a randomised trial	Rakel Gabrielsen, Tina Tellum, Kari Bø, Marie Ellström Engh, Helena Frawley, Synne Nedregård Tveito, Merete Kolberg Tennfjord	2025	NCT05091268	Norway	Endometriosis	High-income	Norwegian Fund for Post-Graduate Training in Physiotherapy	81	Parallel-group RCT	Two university hospitals + community training sites	Blinded assessors for PFM outcomes; participants & trainers unblinded	4-mo supervised weekly exercise + PFMT + 2–3×/week home training vs pain-management-only control	Clinical (pain, dyspareunia, dysuria, constipation), psychological (QoL), physiological (PFM function)	Not used	34	91.9
193	Comparison of letrozole with continuous gonadotropins and clomiphene-gonadotropin combination for ovulation induction in 1387 PCOS women after clomiphene citrate failure: a randomized prospective clinical trial.	Ganesh A; Goswami SK; Chattopadhyay R; Chaudhury K; Chakravarty B	2009	not reported	India	PCOS	Lower-middle-income	Council of Scientific and Industrial Research (CSIR), India	1387	Randomized, prospective, single-blinded clinical trial	Single tertiary infertility centre	Single-blinded (patients blinded; clinicians not blinded)	Letrozole 2.5 mg twice daily (Day 3–7) – Clomiphene citrate 100 mg/day (Day 3–7) + rFSH on Day 3 & 8 – Continuous rFSH from Day 2 until hCG	Clinical (ovulation, pregnancy, miscarriage, cancellation)	Not used	19	51.4
194	Exposure to human chorionic gonadotropin during in vitro maturation does not improve the maturation rate and developmental potential of immature oocytes from patients with polycystic ovary syndrome.	Ge HS; Huang XF; Zhang W; Zhao JZ; Lin JJ; Zhou W	2008	NR	China	PCOS	Upper-middle-income	NR	62	Prospective randomized controlled trial, parallel-group, cycle-level randomization.	Single centre	NR	Group A: IVM medium with FSH + hCG throughout culture. Group B: hCG-free IVM medium for first 10 h, then switched to hCG-containing medium. Group C: hCG-free IVM medium throughout. All oocytes retrieved from unstimulated ovaries, matured in vitro, fertilized by ICSI, and embryos transferred day 2–3.	Embryological outcomes (maturation, fertilization, cleavage, embryo quality); clinical reproductive outcomes (implantation, pregnancy, miscarriage, live birth).	NR	21	56.8
195	Myo-inositol administration positively affects hyperinsulinemia and hormonal parameters in overweight patients with polycystic ovary syndrome	Alessandro D. Genazzani; Chiara Lanzoni; Federica Ricchieri; Valerio M. Jasonni	2008	Not reported	Italy	PCOS	High-income	No external funding reported; study product supplied commercially	20	Randomized controlled trial (parallel, open-label)	University gynecological endocrinology clinic	Open-label	Myo-inositol 2 g/day + folic acid 200 µg/day vs folic acid 200 µg/day for 12 weeks	Hormonal, metabolic, reproductive	Not reported	18	48.6
196	Comparison of neonatal outcomes in women with gestational diabetes with moderate hyperglycaemia on metformin or glibenclamide – A randomised controlled trial	Anne George, Jiji E. Mathews, Dibu Sam, Manisha Beck, Santosh J. Benjamin, Anuja Abraham, Balevendra Antonisamy, Atanu K. Jana, Nihal Thomas	2015	CTRI/2014/02/004418	India	GDM	Lower-middle-income	Local institutional funding (Christian Medical College); no external industry funding	159	Two-arm parallel RCT	Single tertiary hospital (Christian Medical College, Vellore)	Neonatologists and outcome assessors blinded; participants/providers unblinded	Metformin (500–2500 mg/day titrated) vs Glibenclamide (2.5–15 mg/day titrated)	Neonatal clinical outcomes, maternal clinical outcomes	Not reported	25	67.6
197	Defining a minimal clinically important difference for endometriosis-associated pelvic pain measured on a visual analog scale: analyses of two placebo-controlled, randomized trials.	Gerlinger C; Schumacher U; Faustmann T; Colligs A; Schmitz H; Seitz C	2010	not reported	Germany, Italy, Ukraine, Czech Republic, Denmark, Spain, Finland, France, Netherlands, Sweden	Endometriosis	High-income	Bayer Schering Pharma AG	281	Randomized, double-blind, placebo-controlled	Multi-center	Double-blind	Two different active treatments vs placebo	EAPP measured by VAS, global improvement by CGI scale	no	30	81.1
198	The effect of curcumin on metabolic parameters and androgen level in women with polycystic ovary syndrome: a randomized controlled trial	Niloofar Ghanbarzadeh-Ghashti, Solmaz Ghanbari-Homaie, Elnaz Shaseb, Shamsi Abbasalizadeh, Mojgan Mirghafourvand	2023	IRCT20120718010324N51	Iran	PCOS	Upper-middle-income	Tabriz University of Medical Sciences	54	Superiority randomized controlled trial (parallel)	Primary health centers (community-based)	Triple-blind (participants, researchers, analysts)	Curcumin 1000 mg/day (2×500 mg tablets) for 12 weeks vs matched placebo	Metabolic, hormonal, reproductive	Not reported	27	73
199	The effects of metformin or orlistat on obese women with polycystic ovary syndrome: a prospective randomized open-label study	Sedigheh Ghandi, Abbas Aflatoonian, Nasim Tabibnejad, Mohammad Hossein Sojoodi Moghaddam	2011	Not reported	Iran	PCOS	Upper-middle-income	Research and Clinical Center for Infertility, Shahid Sadoughi University of Medical Sciences; Sabzevar University of Medical Sciences	80	Prospective randomized controlled trial (parallel; open-label)	Infertility and gynecology outpatient clinics	Open-label	Metformin up to 1500 mg/day orally vs orlistat 120 mg TID for 3 months	Reproductive, anthropometric, biochemical	Not reported	20	54.1
200	The probiotic supplementation reduced inflammation in polycystic ovary syndrome: A randomized, double-blind, placebo-controlled trial	Nila Ghanei, Nima Rezaei, Ghorban Ali Amiri, Farid Zayeri, Golbou Makki, Esmat Nasseri	2018	IRCT2016081429362N1	Iran	PCOS	Upper-middle-income	National Nutrition and Food Technology Research Institute of Iran	60	Randomised controlled trial	Single-centre (Tehran University of Medical Sciences)	Double-blind	12-week probiotic (four Lactobacillus strains) + Cyproterone acetate vs placebo capsules + Cyproterone acetate	Immunological, metabolic, clinical	Not reported	26	70.3
201	Clomiphene citrate co-treatment with low dose urinary FSH versus urinary FSH for clomiphene resistant PCOS: randomized controlled trial.	Ghanem ME; Elboghdady LA; Hassan M; Helal AS; Gibreel A; Houssen M; Shaker ME; Bahlol I; Mesbah Y	2013	NCT01212263	Egypt	PCOS	Lower-middle-income	not stated	174	Randomised controlled trial	Single private infertility centre in Egypt	none	Group I (intervention): Clomiphene citrate 100 mg/day × 5 days (cycle day 3–7) Plus HP uFSH 37.5 IU/day IM (cycle day 3–13) Step-up increments of 37.5 IU based on follicular response Group II (control): HP uFSH 37.5 IU/day only (cycle day 3–13) Same step-up protocol hCG trigger at follicle ≥18 mm.	Clinical outcomes (ovulation, pregnancy, live birth) Hormonal and metabolic biochemical outcomes Cycle monitoring outcomes (follicle number, endometrial thickness)	not specified	27	73
202	Randomized controlled trial of astaxanthin impacts on antioxidant status and assisted reproductive technology outcomes in women with polycystic ovarian syndrome	Gharaei R., Alyasin A., Mahdavinezhad F., Samadian E., Ashrafnezhad Z., Amidi F.	2022	NCT03991286	Iran	PCOS	Upper-middle-income	Tehran University of Medical Sciences (Grant 98–01-30–41687)	42	Double-blind randomized placebo-controlled trial	Single fertility center (Shariati Hospital, Tehran)	Double-blind (participants & investigators); lab assessors blinded	8 mg/day astaxanthin for 40 days vs placebo during ovarian stimulation cycle	Clinical (ART outcomes), biochemical (oxidative stress markers, gene expression)	Not reported	29	78.4
203	Efficacy of garlic (Allium sativum) on metabolic syndrome components in women with PCOS	Naiiere Gharagozloo Hesari, Shahideh Jahanian-Sadatmahalleh, Parvin Mohebbi, Malihe Nasiri, Ahmad Khosravi	2025	IRCT20150905023897N4	Iran	PCOS	Upper-middle-income	None (explicitly stated)	97	Phase II double-blind RCT	Gynecology clinics of Arash Hospital, Tehran	Double-blind	Garlic tablets 500 mg (2–3 mg allicin) twice daily × 8 weeks vs placebo	Clinical (anthropometric, metabolic, inflammatory), hormonal, QoL, sexual function	Not reported	31	83.8
204	Serum anti-Müllerian hormone levels after ovarian drilling for the second-line treatment of polycystic ovary syndrome: a pilot-randomized study comparing laparoscopy and transvaginal hydrolaparoscopy	Pierluigi Giampaolino, Ilaria Morra, Luigi Della Corte, Stefania Sparice, Costantino Di Carlo, Carmine Nappi, Giuseppe Bifulco	2017	Not reported	Italy	PCOS	High-income	Not reported	246	Randomized controlled clinical trial (open-label)	University hospital surgical gynecology division	None (open surgical trial)	Group A (LOD): Laparoscopic ovarian drilling under general anesthesia, monopolar diathermy, 3–6 punctures per ovary. Group B (THL): Transvaginal hydrolaparoscopy with bipolar electrosurgery, spinal anesthesia, 3–6 punctures.	Hormonal (AMH, LH, FSH); clinical pain	No	24	64.9
205	Effect of the MySweetHeart randomized controlled trial on birth, anthropometric and psychobehavioral outcomes in offspring of women with GDM	Leah Gilbert, Dan Yedu Quansah, Amar Arhab, Sybille Schenk, Justine Gross, Stefano Lanzi, Bobby Stuijfzand, Alain Lacroix, Antje Horsch, Jardena J. Puder, and the MySweetHeart Research Group	2023	ClinicalTrials.gov NCT02890693	Switzerland	GDM	High-income	Swiss National Science Foundation (SNF 32003B_176119, PIs JP & AH); Novo Nordisk unrestricted grant	211	Monocentric, single-blind, parallel RCT	Single-centre (Lausanne University Hospital, CHUV)	Single-blind (assessors blinded; participants unblinded)	Multidimensional pre- and postpartum lifestyle & psychosocial intervention focusing on maternal diet, PA, mental health + infant feeding, sleep, and PA vs active lifestyle-based usual care	Clinical, anthropometric, psychobehavioral	Not specified	30	81.1
206	Cost effectiveness of early metformin in addition to usual care in the reduction of gestational diabetes mellitus effects (EMERGE) — A randomised placebo-controlled clinical trial	Gillespie P, Mahon R, Newman C, Alvarez-Iglesias A, Ferguson J, Smyth A, O’Shea P, Devane D, Egan A, O’Donnell M, Dunne F	2025	EudraCT 2016-001644-19; NCT02980276	Ireland (+ Mayo Clinic USA)	GDM	High-income	Health Research Board (Ireland)	535	Parallel superiority RCT (phase III) — economic evaluation of clinical trial	Multicentre (University Hospital Galway + affiliates)	Double-blind (participants, clinicians, analysts)	Metformin (start 500 mg → 2500 mg daily) + usual care vs placebo + usual care	Health economic (QALY, cost), clinical (composite GDM outcomes)	Not reported	34	91.9
207	Once daily oral relugolix combination therapy versus placebo in patients with endometriosis-associated pain: two replicate phase 3, randomised, double-blind, studies (SPIRIT 1 and 2).	Giudice LC; As-Sanie S; Arjona Ferreira JC; Becker CM; Abrao MS; Lessey BA; Brown E; Dynowski K; Wilk K; Li Y; Mathur V; Warsi QA; Wagman RB; Johnson NP	2022	SPIRIT 1: NCT03204318, EudraCT 2017–001588–19 SPIRIT 2: NCT03204331, EudraCT 2017–001632–19 SPIRIT EXTENSION: NCT03654274, EudraCT 2017-004066-10	Multinational (Africa, Australasia, Europe, North America, South America)	Endometriosis	Mixed Income	Myovant Sciences	1261	Phase 3, multicentre, randomised, double-blind, placebo-controlled	219 community and hospital research centres	Double-blind (patients, investigators, sponsor staff)	Relugolix Combination Therapy: Relugolix 40 mg + estradiol 1 mg + norethisterone acetate 0.5 mg Once daily for 24 weeks Delayed Relugolix Combination Therapy: Relugolix 40 mg monotherapy for 12 weeks → relugolix combination therapy for 12 weeks Placebo: Matched oral tablets and capsules Rescue Analgesics: Prespecified, standardized	Co-Primary Endpoints: Dysmenorrhoea responder rate at week 24 (NRS + analgesic use) Non-menstrual pelvic pain responder rate at week 24 (NRS + analgesic use) Key Secondary Outcomes: Change in EHP-30 pain domain score Average dysmenorrhoea, non-menstrual pelvic pain, overall pelvic pain, dyspareunia NRS scores Proportion not using opioids or analgesics Safety Outcomes: Treatment-emergent adverse e…	The trials did not explicitly reference a formal core outcome set for endometriosis. Co-primary endpoints (dysmenorrhoea and non-menstrual pelvic pain responder rates using NRS + analgesic use) were developed using anchor-based meaningful change thresholds aligned with patient-reported outcomes (PGA, PGIC). EHP-30 Pain Domain and functional endpoints also used anchor-based analyses to define mean…	21	56.8
208	A randomized trial of endometrial scratching in women with PCOS undergoing ovulation induction cycles	Elizabeth Joan Glanville; Jack Wilkinson; Lynn Sadler; Tze Yoong Wong; Santanu Acharya; Nabil Aziz; Fiona Clarke; Sangeeta Das; Jeanette Dawson; Bev Hammond; Kanna Jayaprakasan; Matthew Milner; Nethra Shankaralingaiah; Cynthia Farquhar; Sarah Lensen	2022	ACTRN12614000657628	New Zealand, UK, Brazil	PCOS	Mixed Income	University of Auckland; A+ Trust; Nurture Foundation; Maurice & Phyllis Paykel Trust	117	Parallel, sham-controlled RCT	Multicentre (6 fertility clinics in NZ, UK, Brazil)	Participants blinded; clinicians not blinded; outcome assessors blinded where applicable	Endometrial scratch via pipelle vs sham vaginal pipelle placement	Clinical reproductive outcomes	Yes – COMMIT pregnancy outcome definitions adopted	32	86.5
209	Effect of pioglitazone on glucose metabolism and luteinizing hormone secretion in women with polycystic ovary syndrome.	Glintborg D; Hermann AP; Andersen M; Hagen C; Beck-Nielsen H; Veldhuis JD; Henriksen JE	2006	NR	Denmark	PCOS	High-income	Multiple Danish research foundations (Fonden for Lægevidenskabelig forskning, Novo Nordisk Foundation, Danish Diabetes Association, etc.).	30	Randomized, double-blind, placebo-controlled, parallel-group clinical trial.	Single-centre interventional trial with external control cohort for baseline comparison.	Double-blind (participants and investigators).	Pioglitazone 30 mg/day vs identical placebo for 16 weeks. Compliance checked by tablet counts.	Metabolic (insulin sensitivity, glucose oxidation, lipid oxidation); hormonal (insulin, C-peptide, LH secretion); menstrual regularity.	NR	18	48.6
210	A randomized placebo-controlled study on the effects of pioglitazone on cortisol metabolism in polycystic ovary syndrome	Dorte Glintborg, Anne Pernille Hermann, Claus Hagen, Lars Thorbjørn Jensen, Jan Frystyk, Paul Bennett, Allan Flyvbjerg, Marianne Andersen	2009	NCT00145340	Denmark	PCOS	High-income	Multiple Danish foundations; Novo Nordisk Foundation; Danish Medical Research Council	30	Randomized placebo-controlled trial	Academic tertiary care medical centers	Double-blind	Pioglitazone 30 mg/day vs placebo for 16 weeks	Metabolic, endocrine, biochemical	Not reported	20	54.1
211	Growth hormone alleviates oxidative stress and improves oocyte quality in Chinese women with PCOS: a randomized controlled trial	Gong Y., Luo S., Fan P., Jin S., Zhu H., Deng T., Quan Y., Huang W.	2020	ChiCTR1800019437	China	PCOS	Upper-middle-income	Sichuan Science & Technology Bureau; Chengdu Technology Innovation Project	109	Prospective randomized controlled trial	Single tertiary reproductive medicine center	Physicians conducting IVF procedures were blinded (Supplementary info). Participants not blinded → single-blind	GH 4 IU/day SC from start of rFSH stimulation until trigger vs no GH (standard IVF)	Laboratory (OS markers, mitochondrial assays), embryological (2PN, cleavage), clinical (implantation, pregnancy)	Not used	22	59.5
212	Growth hormone activates PI3K/Akt signaling and inhibits ROS accumulation and apoptosis in granulosa cells of patients with polycystic ovary syndrome.	Gong Y; Luo S; Fan P; Zhu H; Li Y; Huang W	2020	Chinese Clinical Trial Registry. ChiCTR1800019437	China	PCOS	Upper-middle-income	Research and Development project of Science and Technology Bureau of Sichuan	93	Interventional (in vivo GH administration)	Reproductive Medicine Centre, hospital-based	not reported	Growth hormone administered in vivo (specific dose not detailed in excerpt)	Molecular (ROS, MMP, PI3K/Akt signaling, FOXO1, Bax/Bcl-2, caspase-9/3) and cellular (apoptosis rates in GCs)	Not reported	28	75.7
213	Favourable metabolic effects of a eucaloric lower-carbohydrate diet in women with polycystic ovary syndrome	Barbara A. Gower; Paula C. Chandler-Laney; Fernando Ovalle; Laura Lee Goree; Ricardo Azziz; Renee A. Desmond; Wesley M. Granger; Amy M. Goss; G. Wright Bates	2013	Not reported	USA	PCOS	High-income	NIH (R01HD054960, UL1RR025777, P30DK56336, P60DK079626)	30	Randomized controlled crossover trial	Single academic clinical research unit (UAB)	Open-label diet	Eucaloric lower-CHO diet (41% CHO, 40% fat) vs standard diet (55% CHO, 27% fat), each for 8 weeks with 4-week washout	Metabolic, hormonal, mechanistic	Not reported	19	51.4
214	Gonadotrophin-releasing hormone analogue or dienogest plus estradiol valerate to prevent pain recurrence after laparoscopic surgery for endometriosis: a multi-center randomized trial	Roberta Granese, Antonino Perino, Gloria Calagna, Salvatore Saitta, Pasquale De Franciscis, Nicola Colacurci, Onofrio Triolo, Gaspare Cucinella	2015	Not registered	Italy	Endometriosis	High-income	No special funding	78	Prospective multicenter randomized controlled trial	University hospital gynecology departments (3 centers)	Open-label	Dienogest + estradiol valerate oral contraceptive for 9 months vs leuprorelin acetate 3.75 mg monthly for 6 months	Pain (VAS), QoL, clinical recurrence, safety	Not reported	23	62.2
215	Spearmint Herbal Tea Has Significant Anti-Androgen Effects in Polycystic Ovarian Syndrome: A Randomized Controlled Trial	Paul Grant	2010	None reported	UK	PCOS	High-income	None stated	42	Double-blind RCT	Two district general hospitals (NHS Trust)	Researchers blinded; participants blinded (identical herbal teas)	Spearmint tea twice daily vs placebo chamomile tea for 30 days	Clinical (hirsutism scores), biochemical (androgens, gonadotrophins)	None reported	21	56.8
216	The effect of intermittent energy restriction on weight loss and diabetes risk markers in women with a history of gestational diabetes: a 12-month randomized controlled trial	Kristy L. Gray, Peter M. Clifton, Jennifer B. Keogh	2021	ACTRN12617001476325	Australia	GDM	High-income	University of South Australia	121	Randomized non-inferiority RCT	Single-centre clinical trials facility	Open-label	IER: 2 days/week 500 kcal; CER: 1500 kcal/day 7 days/week; both 25% weekly energy restriction	Clinical, metabolic, behavioural	Not used	29	78.4
217	Effect on the cardiovascular independent risk factor lipoprotein(a) in overweight or obese PCOS patients with ethinyl-estradiol/drospirenone alone or plus orlistat	Muqing Gu, Xiangyan Ruan, Yanqiu Li, Tianhe Li, Chenghong Yin, Alfred O. Mueck	2022	Not reported	China	PCOS	Upper-middle-income	Beijing Municipal Administration of Hospitals’ Ascent Plan (DFL20181401)	66	Randomized controlled trial	Single tertiary gynecologic endocrine center	Open-label (no blinding)	EE 20 μg + DRSP 3 mg daily vs same + orlistat 120 mg TID for 3 months	Clinical biochemical (Lp(a), CRP, LDL-C, hormones) & anthropometric	Not used	17	45.9
218	Regular Exercise to Prevent the Recurrence of Gestational Diabetes Mellitus: A Randomized Controlled Trial	Kym J. Guelfi, Ming Jing Ong, Nicole A. Crisp, Paul A. Fournier, Karen E. Wallman, J. Robert Grove, Dorota A. Doherty, John P. Newnham	2016	ClinicalTrials.gov NCT01283854	Australia	GDM	High-income	National Health and Medical Research Council (NHMRC Grant 1003302); Women and Infants Research Foundation; Channel 7 Telethon	172	Parallel, two-arm randomised controlled trial	Single-centre (University of Western Australia, Perth)	Open-label (participants and supervisors); blinded lab analysts	14-week supervised home-based stationary cycling (3×/week, 20–60 min, 65–85% max HR) vs standard antenatal care	Clinical and behavioural	Not specified	26	70.3
219	Pioglitazone Metformin Complex Improves Polycystic Ovary Syndrome Comorbid Psychological Distress via Inhibiting NLRP3 Inflammasome Activation	Qing-jun Guo, Jing Shan, Yi-feng Xu, Yan-yan Hu, Cui-lan Huo, Jing-yun Song, Chao-qun Wang, Hui Zhou, Chao-qin Yu, Qin Huang	2020	ChiCTR-OPC-17011930	China	PCOS	Upper-middle-income	National Natural Science Foundation of China; Wu Jieping Medical Foundation; Ministry of Science & Technology Industry Fund	111	Double-blind, three-arm RCT	Single tertiary hospital (Changhai Hospital, Shanghai)	Double-blind	PM complex (pioglitazone 15 mg + metformin 500 mg) TID vs metformin 500 mg TID vs placebo TID, 12 weeks	Psychological (SCL-90-R), inflammatory (NLRP3, cytokines), hormonal (TT), metabolic	Not used	20	54.1
220	Efficacy of Different Progestins in Women With Advanced Endometriosis Undergoing Controlled Ovarian Hyperstimulation for IVF – A Single-Center Non-inferiority Randomized Controlled Trial	Haiyan Guo, Jianghui Li, Xi Shen, Yanyan Cong, Yun Wang, Ling Wu, Bin Li, Hongyuan Gao, Meng Ma, Wei Zhang, Xiaoyan Mao, Yonglun Fu, Qifeng Lyu, Weiran Chai, Yanping Kuang	2020	ChiCTR-OIN-16008529	China	Endometriosis	Upper-middle-income	National Key Research and Development Program of China; National Natural Science Foundation of China	450	Non-inferiority RCT (three-arm)	Single tertiary reproductive medicine center	Open-label (no participant/provider blinding described)	Group A: MPA 4 mg/day + hMG; Group B: dydrogesterone 20 mg/day + hMG; Group C: progesterone 100 mg/day + hMG; all followed by GnRH-a + hCG trigger	Clinical (pregnancy, LH surge, OHSS) and embryologic (oocytes, embryos) outcomes	No	30	81.1
221	The Efficacy of an Intensive Lifestyle Modification Program on Psychosocial Outcomes among Rural Women with Prior Gestational Diabetes Mellitus: Six Months Follow-Up of a Randomized Controlled Trial	Jia Guo; Qing Long; Jundi Yang; Qian Lin; James Wiley; Jyu-Lin Chen	2021	ChiCTR1800015023	China	GDM	Upper-middle-income	China Medical Board (16-256); Hunan Young Elite Project S&T Dept (S2019RSRCHX0312)	320	Randomized controlled trial	Multisite (two counties in Hunan Province)	Outcome assessors blinded; participants & interventionists unblinded	Social cognitive theory-based intensive lifestyle modification vs usual care	Psychosocial outcomes (stress, support, QoL); HbA1c	Not reported	24	64.9
222	The effects of a couple-based gestational diabetes mellitus intervention on self-management and pregnancy outcomes: A randomized controlled trial	Min Guo, Wen-Xin Shi, Judith Parsons, Angus Forbes, Min Kong, Yin-Ping Zhang, Haixia Yang, Rita Forde	2023	ChiCTR2100054797	China	GDM	Upper-middle-income	China Scholarship Council; Shaanxi Provincial R&D Fund	140	Parallel 1:1 RCT	Three tertiary hospitals in Xi’an	Assessor-blinded only; participants and interventionists unblinded	Couples Coping with GDM Programme (education + shared illness appraisal + collaborative action training + follow-up) vs standard individual GDM education	Behavioral (self-management); clinical (pregnancy outcomes)	Not reported	26	70.3
223	Pioglitazone therapy increases insulin-stimulated release of d-chiro-inositol-containing inositolphosphoglycan mediator in women with polycystic ovary syndrome	Anshu Gupta; Daniela Jakubowicz; John E. Nestler	2016	ClinicalTrials.gov NCT00868140	USA & Venezuela	PCOS	Mixed Income	NIH (R01HD035629; KL2TR000057); study drug supplied by Takeda Pharmaceuticals	32	Randomized, double-blind, placebo-controlled trial	Tertiary referral academic centers (VCU; Hospital de Clínicas Caracas)	Double-blind (participants and investigators)	Pioglitazone 45 mg/day orally vs matched placebo for 6 months	Metabolic, mechanistic	Not reported	29	78.4
224	Norethindrone acetate versus dienogest for pain relief in endometriosis-related pain: A randomized controlled trial	Tansu Bahar Gurbuz, Kiper Aslan, Isil Kasapoglu, Ludovico Muzii, Gurkan Uncu	2025	NCT05476172	Türkiye	Endometriosis	Upper-middle-income	No external funding	70	Prospective randomized controlled trial	Single center (Bursa Uludag University)	Open-label (no blinding)	NETA 5 mg/day vs Dienogest 2 mg/day for 12 months	Clinical (pain, endometrioma size), tolerability	No	21	56.8
225	Vitamin D Status of Infants of Mothers with Gestational Diabetes: Status at Birth and a Randomized Controlled Trial of Vitamin D Supplementation Across Infancy	Weiler HA; Attar A; Farahnak Z; Sotunde OF; Razaghi M; Gharibeh N; Khamessan A; Vanstone CA	2022	NCT02563015	Canada	GDM	High-income	Canadian Institutes of Health Research; Canada Research Chair Program; Canada Foundation for Innovation	16	Double-blind randomized parallel RCT	Single hospital (Lakeshore Hospital, Montreal)	Double-blinded (parents & investigators)	400 vs 1000 IU/day vitamin D3 drops from 1–12 months	Vitamin D levels; growth parameters; bone metrics	No	25	67.6
226	Metformin, naltrexone, or the combination of prednisolone and antiandrogenic oral contraceptives as first-line therapy in hyperinsulinemic women with polycystic ovary syndrome.	HadÅ¾iomeroviÄ‡-PekiÄ‡ D; Wildt L; Weiss JM; Moeller K; Mattle V; Seeber BE	2010	NR	Austria	PCOS	High-income	Supported by the Medical University of Innsbruck, Austria.	29	Prospective randomized pilot trial, three parallel arms, open-label.	Single academic university hospital.	None (open-label; subjects and investigators not blinded).	Metformin: 500 mg BID for 1 wk → 500 mg TID for 11 wks. Naltrexone: 50 mg/day for 3 months. OC + Prednisolone: Prednisolone 5 mg/day for 3 months + anti-androgenic OC (ethinyl estradiol 35 µg / cyproterone acetate 2 mg) during first month.	Reproductive (ovulation, androgen levels); metabolic (BMI, lipids, BP, OGTT insulin).	NR	18	48.6
227	Adding L-carnitine to antagonist ovarian stimulation doesn’t improve the outcomes of IVF/ICSI cycle in patients with PCOS: a double-blind randomized clinical trial	Hafezi M., Arabipoor A., Ghaffari F., Vesali S., Zareei M., Hajinaghibali Hessari Z.	2024	NCT04672720	Iran	PCOS	Upper-middle-income	No specific grant; conducted within Royan Institute (public research center)	110	Double-blind RCT	Single centre (Royan Institute)	Double-blind (patients and clinicians); identical placebo	L-carnitine 1000 mg ×3/day during COS vs placebo	Clinical (oocyte/embryo/pregnancy outcomes); metabolic	Not reported	27	73
228	The effects of flaxseed supplementation on metabolic status in women with polycystic ovary syndrome: a randomized open-labeled controlled clinical trial	Fatemeh Haidari, Nasrin Banaei-Jahromi, Mehrnoosh Zakerkish, Kambiz Ahmadi	2020	IRCT20120704010181N11	Iran	PCOS	Upper-middle-income	Ahvaz Jundishapur University of Medical Sciences (Grant NRC-9616)	48	Randomized controlled clinical trial (parallel, open-label)	Single tertiary hospital endocrinology clinic	Open-label	Flaxseed powder 30 g/day plus lifestyle modification vs lifestyle modification alone for 12 weeks	Metabolic, anthropometric, hormonal	Not reported	23	62.2
229	Effect of probiotic supplements in women with gestational diabetes mellitus on inflammation and oxidative stress biomarkers: a randomized clinical trial	Majid Hajifaraji, Fatemeh Jahanjou, Fatemeh Abbasalizadeh, Nasser Aghamohammadzadeh, Mehran Mesgari Abbasi, Neda Dolatkhah	2018	IRCT201405181597N3	Iran	GDM	Upper-middle-income	Shahid Beheshti University of Medical Sciences (Iran)	64	Double-blind, placebo-controlled RCT	Single-centre (Al-Zahra University Hospital, Tabriz)	Double-blind (participants and investigators)	Daily probiotic capsule (Lactobacillus acidophilus LA-5, Bifidobacterium BB-12, Streptococcus thermophilus STY-31, Lactobacillus delbrueckii bulgaricus LBY-27; 4×10⁹ CFU) vs placebo for 8 weeks	Biochemical (inflammatory + oxidative stress)	Not reported	28	75.7
230	Effect of ginger on the blood glucose level of women with gestational diabetes mellitus (GDM) with impaired glucose tolerance test (GTT): a randomized double-blind placebo-controlled trial	Fariba Hajimoosayi, Shahideh Jahanian Sadatmahalleh, Anoshirvan Kazemnejad, Reihane Pirjani	2020	IRCT2015090523897N1	Iran	GDM	Upper-middle-income	Tarbiat Modares University, Tehran, Iran	70	Randomised double-blind placebo-controlled trial	Single-centre (Arash Hospital, Tehran University of Medical Sciences)	Double-blind (participants, clinicians, and investigators)	Ginger tablets (1500 mg/day; 3 × 500 mg after meals) for 6 weeks vs placebo tablets	Clinical (glycaemic and metabolic)	Not reported	20	54.1
231	Home-Based Exercise Improves Fitness and Exercise Attitude and Intention in GDM Women	Rhiannon E. Halse, Karen E. Wallman, James A. Dimmock, John P. Newnham, Kym J. Guelfi	2015	Not registered	Australia	GDM	High-income	University of Western Australia; Women & Infants Research Foundation; NHMRC (1003302)	40	Parallel randomized controlled trial	Single-centre (King Edward Memorial Hospital, Perth)	Open-label	Supervised home-based cycling program (3 supervised + 2 unsupervised weekly sessions for 6 ± 1 weeks) vs standard GDM care	Clinical & behavioural	Not used	19	51.4
232	Effects of combined metformin and cabergoline versus metformin alone on ovarian and hormonal activities in Iraqi patients with PCOS and hyperprolactinemia: a randomized clinical trial	Inas Naser Hamad, Sinaa Abdul Amir Kadhim, Hayder Adnan Fawzi, Shoroq Mohammed Al-Temimi, Bassim Mohammad, Asma Swadi	2023	NCT05981742	Iraq	PCOS	Lower-middle-income	Not specifically funded; institutional support	75	Open-label, three-arm randomized clinical trial	Single centre (Maternity & Pediatrics Teaching Hospital, Al-Diwaniyah)	Open-label, no blinding	Metformin (500 mg BID) vs Cabergoline (0.5 mg weekly) vs Combination (both) for 90 days	Clinical, hormonal, ultrasound	Not reported	22	59.5
233	The effect of social network based motivational interviewing on health behaviors among infertile women with polycystic ovary syndrome: A randomized controlled trial.	Hamzehgardeshi Z; Elyasi F; Moosazadeh M; Ahmadi I; Jahanfar S; Ahmadian M; Ansari F	2024	IRCT20160619028528N4	Iran	PCOS	Upper-middle-income	not reported	60	Parallel-group randomized controlled trial	single centre-Infertility clinic, Imam Khomeini Hospital, Sari, Iran	Blinded assessors; participants and instructors not blinded	Five weekly motivational interviewing sessions via WhatsApp (audio/video + PowerPoint), covering orientation, emotions, pros/cons of behaviors, values/vision, final assessment, plus ongoing support during follow-up	Health-promoting behaviors (HPLP-II), Quality of Life (MPCOSQ), acceptability (Client Satisfaction Questionnaire-8)	not reported	31	83.8
234	Low-dose esketamine with sufentanil for postcesarean analgesia in women with gestational diabetes mellitus: a prospective, randomized, double-blind study	Tao Han, Qin Chen, Jie Huang, Jie Zhang, Aiyuan Li, Wei Xu, Zheming Peng, Zhen Li, Liang Chen	2023	ChiCTR2400090569	China	GDM	Upper-middle-income	Scientific Research Project of Hunan Provincial Health Commission (202104110803, 202104110613); Natural Science Foundation of Hunan Province (2023JJ60284); Hunan Provincial Science & Technology Plan (2019SK4008)	140	Prospective randomized controlled double-blind trial	Single-centre (Hunan Provincial Maternal & Child Health Care Hospital, Changsha)	Double-blind (participants, surgeons, and assessors blinded)	Esketamine 0.5 mg/kg + sufentanil 150 μg + ondansetron 4 mg vs sufentanil 150 μg + ondansetron 4 mg (both diluted to 100 mL saline for PCA)	Clinical and perioperative	Not reported	24	64.9
235	Metformin versus acarbose therapy in patients with polycystic ovary syndrome (PCOS): a prospective randomised double-blind study	Aida Hanjalic-Beck, Boris Gabriel, Wolfgang Schaefer, Hans-Peter Zahradnik, Marcus Schories, Clemens Tempfer, Christoph Keck, Dominik Denschlag	2010	Not reported	Germany, Switzerland, Austria	PCOS	High-income	Not stated	75	Prospective randomized double-blind controlled trial	Multi-centre (Germany, Switzerland, Austria)	Double-blind (participants + investigators)	Metformin up-titrated to 2550 mg/day × 12 wks vs acarbose up-titrated to 300 mg/day × 12 wks	Clinical (ovulation, menses), metabolic (insulin, cholesterol, BMI), hormonal (T, SHBG, LH, etc.)	Not reported	29	78.4
236	Psychological interventions improve quality of life despite persistent pain in endometriosis: results of a 3-armed randomized controlled trial	K.E. Hansen, B. Brandsborg, U.S. Kesmodel, A. Forman, M. Kold, R. Pristed, O. Donchulyesko, D. Hartwell, L. Vase	2023	NCT02761382	Denmark	Endometriosis	High-income	TrygFonden; Ladywalk; Danish Endometriosis Patient Association	58	3-arm parallel RCT	Multicentre (3 outpatient endometriosis clinics)	Participants partially blinded to PI type; analysts blinded; therapists crossed	MY-ENDO (mindfulness + ACT) vs Non-specific psychological intervention vs Waitlist	Clinical (pain, symptoms), QoL, functional	Not reported	32	86.5
237	Low-dose oral contraceptive pill for dysmenorrhea associated with endometriosis: a placebo-controlled, double-blind, randomized trial	Harada T., Momoeda M., Taketani Y., Hoshiai H., Terakawa N.	2008	Not reported	Japan	Endometriosis	High-income	All authors received consulting fees from Nobelpharma Co., Ltd (manufacturer also prepared study medication)	100	Double-blind randomized placebo-controlled RCT (Phase III)	Multicentre (18 centres: 13 clinics, 5 hospitals)	Double-blind (participants + clinicians); identical blister packs	OCP (ethinylestradiol 0.035 mg + norethisterone 1 mg) 21 days + 7 placebo vs identical 28-day placebo	Clinical (pain), imaging (endometrioma volume), behavioral (analgesic use)	Not reported	27	73
238	Dienogest is as effective as intranasal buserelin acetate for the relief of pain symptoms associated with endometriosis: a randomized, double-blind, multicenter, controlled trial	Tasuku Harada; Mikio Momoeda; Yuji Taketani; Takeshi Aso; Masao Fukunaga; Hiroshi Hagino; Naoki Terakawa	2009	Not reported	Japan	Endometriosis	High-income	Mochida Pharmaceutical Co., Ltd.	271	Phase III randomized double-blind controlled trial	24 multicenter gynecology sites	Double-blind, double-dummy	Dienogest 2 mg/day orally vs buserelin acetate 900 μg/day intranasally for 24 weeks	Pain, clinical, QOL, safety	Not reported	26	70.3
239	Ethinylestradiol 20 µg / drospirenone 3 mg in a flexible extended regimen for management of endometriosis-associated pelvic pain: a randomized controlled trial	Harada T, Kosaka S, Elliesen J, Yasuda M, Ito M, Momoeda M	2017	NCT01697111	Japan	Endometriosis	High-income	Bayer Yakuhin, Ltd.; funder involved in trial design, analyses, writing	312	Phase 3 randomized, double-blind, placebo-controlled parallel-group trial with open-label extension	32 centers across Japan	Double-blind (FlexibleMIB vs placebo) for 24-week phase; open-label extension	FlexibleMIB (EE20/DRSP 3 mg) daily up to 120 days ± 4-day tablet-free interval for bleeding; comparator: placebo; separate unblinded dienogest arm	Clinical pain outcomes, imaging (ultrasound), hormonal labs, adverse events, patient-reported outcomes	Not reported	33	89.2
240	Relugolix, an oral gonadotropin-releasing hormone receptor antagonist, reduces endometriosis-associated pain compared with leuprorelin in Japanese women: a phase 3, randomized, double-blind, noninferiority study.	Harada T; Osuga Y; Suzuki Y; Fujisawa M; Fukui M; Kitawaki J	2022	NCT03055955	Japan	Endometriosis	High-income	not mentioned	335	Phase 3, randomized, double-blind, double-dummy, active-controlled trial	42 centers in Japan	Double-blind (participants + outcome assessors)	REL 40 mg oral once daily for 24 weeks; LEU 1.88 or 3.75 mg subcutaneous injection every 4 weeks for 24 weeks	Efficacy and safety outcomes	not reported	33	89.2
241	Efficacy and safety of estetrol 15 mg/drospirenone 3 mg in a cyclic regimen for the treatment of endometriosis-associated pain: a multicenter, placebo-controlled, double-blind, randomized study	Tasuku Harada, Takao Kobayashi, Akihiro Hirakawa, Toshiaki Takayanagi, Masayoshi Nogami, Takayuki Mochiyama, Masashi Hirayama, Jean-Michel Foidart, Yutaka Osuga	2024	jRCT2011210027	Japan	Endometriosis	High-income	Fuji Pharma Co., Ltd.	162	Randomized, placebo-controlled, double-blind parallel-group RCT	25 hospital centres	Double-blind (participants, investigators, statisticians)	Estetrol 15 mg + Drospirenone 3 mg cyclic regimen (24 days + 4 days placebo) vs full-cycle placebo × 6 cycles	Clinical (pain endpoints, gynecologic findings), biochemical (CA-125), QoL	Not reported	34	91.9
242	Synbiotic as an ameliorating factor in the health-related quality of life in women with polycystic ovary syndrome: a randomized, triple-blind, placebo-controlled trial	Zahra Hariri, Zahra Yari, Sedighe Hoseini, Khadijeh Abhari, Golbon Sohrab	2024	IRCT20211108053007N1	Iran	PCOS	Upper-middle-income	Student Research Committee + Research & Technology Chancellor, Shahid Beheshti University of Medical Sciences	56	Randomized controlled trial (triple-blind)	Obstetrics & gynecology clinic, Ayatollah Taleghani Hospital (Tehran)	Triple-blind (participants, investigators, analysts)	Synbiotic: 2 g/day containing B. coagulans GBI-30, L. rhamnosus, L. helveticus, FOS. Placebo: 2 g/day starch + flavoring. Duration: 12 weeks	Patient-reported outcomes (HRQoL, stress), anthropometric	No	26	70.3
243	A consumer co-created infographic improves short-term knowledge about physical activity and self-efficacy to exercise in women with gestational diabetes mellitus: a randomised trial	Anne L. Harrison, Nicholas F. Taylor, Helena C. Frawley, Nora Shields	2020	ACTRN12619001207101 (prospectively registered)	Australia	GDM	High-income	Mercy Health Services Academic Research & Development Committee	69	Randomised controlled trial	Single metropolitan hospital	Participants and provider not blinded; assessor blinded for outcome scoring	Consumer-designed physical-activity infographic + usual GDM education vs usual GDM education alone	Knowledge, behavioural self-efficacy	Not reported	25	67.6
244	The Roles of Probiotics in the Gut Microbiota Composition and Metabolic Outcomes in Asymptomatic Post-Gestational Diabetes Women: A Randomized Controlled Trial	Zubaidah Hasain, Raja Affendi Raja Ali, Hajar Fauzan Ahmad, Ummul Fahri Abdul Rauf, Seok Fang Oon, Norfilza Mohd Mokhtar	2022	ClinicalTrials.gov NCT05273073	Malaysia	GDM	Upper-middle-income	Universiti Kebangsaan Malaysia & B-Crobes Laboratory Sdn. Bhd.	132	Randomized, double-blind, placebo-controlled trial	Single-centre (Universiti Kebangsaan Malaysia Medical Centre)	Double-blind (participants & investigators)	12-week daily probiotic sachets (HEXBIO®, 30 billion CFU, 6 Lactobacillus/Bifidobacterium strains) vs identical placebo	Clinical, metabolic, microbiome	Not reported	29	78.4
245	Cost effectiveness of letrozole and purified urinary FSH in treating women with clomiphene citrate-resistant polycystic ovarian syndrome: a randomized controlled trial	AbdelGany Hassan, Nesreen Shehata, Amr Wahba	2017	NCT02304107	Egypt	PCOS	Lower-middle-income	Self-funded	140	Randomized controlled trial (parallel)	University hospitals (Cairo University & Beni-Suef University)	Open-label	Letrozole 2.5 mg BID for 5 days per cycle vs purified urinary FSH starting 75 IU/day with step-up regimen; up to 3 cycles	Reproductive, economic	Not reported	27	73
246	Administration of atosiban in patients with endometriosis undergoing frozen-thawed embryo transfer: a prospective, randomized study.	He Y; Wu H; He X; Xing Q; Zhou P; Cao Y; Wei Z	2016	ChiCTR-IOQ-14005715	China	Endometriosis	Upper-middle-income	NR	120	Prospective, randomized, controlled clinical trial.	Single tertiary university hospital IVF center.	Partial blinding: laboratory staff and embryo-transfer operators blinded; patients and research assistant not blinded.	Atosiban group: single IV bolus 6.75 mg atosiban administered ~30 minutes before ET. Control group: no atosiban. All patients underwent natural or artificial FET with standard luteal support.	Reproductive outcomes (implantation rate, clinical pregnancy rate, miscarriage rate); physiological outcomes (uterine contractions, OT, PGF2α).	NR	30	81.1
247	The Effect of Health Education Combined with Personalized Psychological Nursing Intervention on Pregnancy Outcome of Pregnant Women with Gestational Diabetes Mellitus	Rubi He; Qiong Lei; Haibin Hu; Hui Li; Dongmei Tian; Zhicun Lai	2022	Not stated	China	GDM	Upper-middle-income	Subject of Guangdong Provincial Bureau of Traditional Chinese Medicine (20152021)	170	Randomized controlled trial	Single centre (Guangdong Women and Children Hospital)	Open-label (no blinding)	Routine care vs routine care + structured health education + team-based psychological nursing	Glycemic indices; compliance; disease awareness; satisfaction; pregnancy outcomes	Not used	22	59.5
248	Use of mobile fitness app to improve pelvic floor muscle training in puerperal women with gestational diabetes mellitus: A randomized controlled trial	Xiaocheng He, Yaping Xie, Baoyuan Xie, Meijing Zhao, Honghui Zhang, Xiaoshan Zhao, Huifen Zhao	2025	ChiCTR2400090569	China	GDM	Upper-middle-income	Startup Fund for Scientific Research, Fujian Medical University (2022QH1119); Fujian Provincial Key Clinical Specialties Construction Project (HLZDZK202301)	72	Parallel randomized controlled trial	Single-centre (The Second Affiliated Hospital of Fujian Medical University, Quanzhou)	Single-blind (assessors blinded; participants unblinded)	App-based PFMT via “Keep” (video-guided Kegel sessions, reminders, and social support) vs standard PFMT instruction (manual guidance)	Clinical and behavioral	Not reported	23	62.2
249	Surgical treatment of endometriosis: a prospective randomized double-blinded trial comparing excision and ablation	Martin Healey; W. Catarina Ang; Claudia Cheng	2010	Not reported	Australia	Endometriosis	High-income	Australian Gynaecological Endoscopy Society Research Foundation; L.E.W. Carty Charitable Fund; Royal Women’s Hospital Foundation	178	Prospective randomized double-blind controlled trial	University teaching hospital endometriosis & pelvic pain clinic	Double-blind (participants and follow-up clinicians blinded)	Laparoscopic excision of visible endometriosis vs laparoscopic ablation using surgeon’s preferred energy modality	Pain (VAS)	Not reported	31	83.8
250	A tailored letter based on electronic health record data improves gestational weight gain among women with gestational diabetes mellitus: The GEM cluster-randomized controlled trial	Monique M. Hedderson, Susan D. Brown, Samantha F. Ehrlich, Ai-Lin Tsai, Yeyi Zhu, Charles P. Quesenberry, Yvonne Crites, Assiamira Ferrara	2018	NCT01344278	USA	GDM	High-income	Agency for Healthcare Research and Quality; National Institute of Diabetes and Digestive and Kidney Diseases	2014	Cluster RCT	44 medical facilities	Investigators and clinicians blinded to facility assignment	Tailored EHR-generated letter plus postpartum lifestyle programme (13 telephone sessions) vs usual care	Gestational weight gain; postpartum weight retention; perinatal outcomes	Not reported	28	75.7
251	Effect of Metformin on Microvascular Endothelial Function in Polycystic Ovary Syndrome	Behnam Heidari, Amir Lerman, Antigoni Z. Lalia, Lilach O. Lerman, Alice Y. Chang	2019	NCT02086526	USA	PCOS	High-income	St. Jude Medical Foundation; NIH BIRCWH; NCATS	48	Parallel-group RCT (open-label)	Single centre (Mayo Clinic)	Open-label	Metformin XR 1500 mg/day vs no treatment (delayed-start crossover at 3 months)	Physiologic (endothelial function RH-PAT), metabolic, hormonal	Not used	24	64.9
252	A Higher-Complex Carbohydrate Diet in Gestational Diabetes Mellitus Achieves Glucose Targets and Lowers Postprandial Lipids: A Randomized Crossover Study	Teri L. Hernandez; Rachael E. Van Pelt; Molly A. Anderson; Linda J. Daniels; Nancy A. West; William T. Donahoo; Jacob E. Friedman; Linda A. Barbour	2014	NCT01719029	USA	GDM	High-income	NIH (R21 DK 088324); NIH/NCTSI UL1 TR000154; Colorado NORC P30 DK 048520; University of Colorado DER Centre	16	Randomized crossover RCT	University hospital + Kaiser Permanente Colorado	CGMS glucose assessor blinded; participants not blinded	HCC/LF diet (60% carb, 25% fat) vs LC/HF conventional GDM diet (40% carb, 45% fat); isocaloric; 3-day periods	Glycemic AUC; insulin; TG; FFA	Not reported	21	56.8
253	Women With Gestational Diabetes Mellitus Randomized to a Higher–Complex Carbohydrate/Low-Fat Diet Manifest Lower Adipose Tissue Insulin Resistance, Inflammation, Glucose, and Free Fatty Acids: A Pilot Study	Teri L. Hernandez, Rachael E. Van Pelt, Molly A. Anderson, Melanie S. Reece, Regina M. Reynolds, Becky de la Houssaye, Margaret Heerwagen, William T. Donahoo, Linda J. Daniels, Catherine Chartier-Logan, Rachel C. Janssen, Jacob E. Friedman, Linda A. Barbour	2016	NCT01719029	United States	GDM	High-income	NIH (R21 DK088324); Colorado Clinical & Translational Science Institute; Colorado Nutrition & Obesity Research Center	12	Parallel, randomized controlled pilot trial	Single-centre (University of Colorado; Kaiser Permanente)	Open-label	CHOICE diet (60% carb / 25% fat / 15% protein) vs LC/CONV diet (40% carb / 45% fat / 15% protein); all meals provided	Clinical, metabolic, adipose tissue	Not reported	27	73
254	Randomization to a Provided Higher-Complex-Carbohydrate Versus Conventional Diet in Gestational Diabetes Mellitus Results in Similar Newborn Adiposity	Teri L. Hernandez et al.	2023	NCT02244814	USA	GDM	High-income	American Diabetes Association	59	Parallel RCT	Single	Partial (blinded investigators only)	High-complex-carbohydrate diet vs standard carbohydrate diet	Clinical / reproductive (neonatal adiposity; maternal metabolic indices)	Yes	29	78.4
255	The Impact of Metformin, Oral Contraceptives, and Lifestyle Modification on Polycystic Ovary Syndrome in Obese Adolescent Women in Two Randomized, Placebo-Controlled Clinical Trials	Kathleen M. Hoeger, Kristen Davidson, Lynda Kochman, Tracy Cherry, Laurie Kopin, David S. Guzick	2008	Not registered (pre-2007)	United States	PCOS	High-income	NIH Grants K23 HD043881, R03 HD41989; NCRR UL1 RR024160; Organon Pharmaceuticals supplied Desogen	79	Two parallel RCTs (single-treatment and combined-treatment trials)	Single-centre (University of Rochester Medical Center, NY)	Double-blind for metformin vs placebo; open-label for OC and lifestyle	Single-trial: metformin (1700 mg/d) vs placebo vs OC (EE 30 µg + desogestrel 0.15 mg) vs lifestyle modification (diet/exercise/behavioral program); Combined trial: OC (EE 30 µg + drospirenone 3 mg) + lifestyle ± metformin (2000 mg/d)	Clinical, endocrine, and metabolic	Not reported	19	51.4
256	Glycemic control in gestational diabetes and impact on biomarkers in women and infants	Olivia J. Hofer, Jane Alsweiler, Thach Tran, Caroline A. Crowther	2023	ACTRN12615000282583	New Zealand	GDM	High-income	Health Research Council of New Zealand (HRC 14/449); JN Williams Memorial Trust; HB Williams Turanga Trust; Aotearoa Foundation	82	Nested cohort within stepped-wedge cluster RCT (TARGET Trial)	Multicentre (4 New Zealand hospitals)	Assay personnel blinded; clinicians unblinded	Tight glycemic targets (FPG ≤5.0 mmol/L; 1h ≤7.4 mmol/L; 2h ≤6.7 mmol/L) vs less tight (FPG <5.5; 1h <8.0; 2h <7.0 mmol/L)	Clinical and biochemical (maternal and infant biomarkers)	Not reported	32	86.5
257	Postnatal Lifestyle Intervention for Overweight Women With Previous Gestational Diabetes: A Randomized Controlled Trial (PAIGE)	Valerie A. Holmes, Claire R. Draffin, Chris C. Patterson, Loraine Francis, Joanne Irwin, Mae McConnell, Brid Farrell, Sarah F. Brennan, Oonagh McSorley, Amy C. Wotherspoon, Mark Davies, David R. McCance	2018	ISRCTN55443431	UK (Northern Ireland)	GDM	High-income	Public Health Agency, Northern Ireland	60	Cluster randomized controlled trial	Two joint diabetes–antenatal clinics	Not blinded (nature of intervention); outcome assessors not blinded	PAIGE: 60-min educational session + 12-wk Slimming World referral + pedometer + motivational texts/calls vs usual care	Clinical (weight, BMI), metabolic (glucose, insulin), psychosocial	Not reported	26	70.3
258	Clomifene citrate or low-dose FSH for the first-line treatment of infertile women with anovulation associated with polycystic ovary syndrome: a prospective randomized multinational study	R. Homburg, M.L. Hendriks, T.E. König, R.A. Anderson, A.H. Balen, M. Brincat, T. Child, M. Davies, T. D’Hooghe, A. Martinez, M. Rajkhowa, R. Rueda-Saenz, P. Hompes, C.B. Lambalk	2012	ISRCTN41865643	Netherlands, UK, Belgium, Malta, Argentina, Colombia	PCOS	Mixed Income	Organon (unrestricted educational grant; no role in study design, analysis, reporting)	302	Prospective, multicentre, randomized controlled trial	10 fertility centres across Europe & South America	Open-label (no masking possible)	CC 50–150 mg/day × 5 days vs low-dose step-up rFSH starting at 50 IU with weekly increments	Clinical reproductive outcomes (pregnancy, live birth, miscarriage, multiple pregnancy)	None reported	30	81.1
259	Impact of a Telemedicine System with Automated Reminders on Outcomes in Women with Gestational Diabetes Mellitus	Carol J. Homko; Larry C. Deeb; Kimberly Rohrbacher; Wadia Mulla; Dimitrios Mastrogiannis; John Gaughan; William P. Santamore; Alfred A. Bove	2012	NCT00778804	USA	GDM	High-income	NIH R21-DK-071694	80	Randomized controlled trial	Two-site hospital-based	Unblinded	Enhanced telemedicine (Internet + IVR + reminders) vs usual care	Maternal glucose control; infant birth weight; neonatal outcomes	Not reported	20	54.1
260	Efficacy and safety of ASP1707 for endometriosis-associated pelvic pain: the phase II randomized controlled TERRA study	Thomas D’Hooghe, Takao Fukaya, Yutaka Osuga, Robin Besuyen, Beatriz López, Gertjan M. Holtkamp, Kentaro Miyazaki, Laurence Skillern	2019	NCT01767090; EudraCT 2012-002791-14	Belgium, Japan, multiple EU countries	Endometriosis	High-income	Sponsored by Astellas Pharma Inc.	540	Phase II multicenter randomized double-blind placebo-controlled trial	Multinational academic and hospital-based gynecology centers	Double-blind (ASP1707 vs placebo); leuprorelin open-label reference	ASP1707 oral GnRH antagonist (3, 5, 10, or 15 mg/day) vs placebo for 12 weeks; leuprorelin acetate as active reference	Pain, hormonal, safety, bone health	Not reported	34	91.9
261	Effects of licorice extract in combination with a low-calorie diet on obesity indices, glycemic indices, and lipid profiles in overweight/obese women with polycystic ovary syndrome (PCOS): a randomized, double-blind, placebo-controlled trial.	Hooshmandi H; Ghadiri-Anari A; Ranjbar AM; Fallahzadeh H; Hosseinzadeh M; Nadjarzadeh A	2024	IRCT20200922048802N2	Iran	PCOS	Upper-middle-income	not reported	66	Randomized, double-blind, placebo-controlled trial	Single-centre (Emam Ali outpatient clinic, Yazd, Iran)	Double-blind (participants and study personnel)	Licorice extract 1.5 g/day (three 500 mg capsules) + low-calorie diet for 8 weeks	Placebo capsules (corn starch 500 mg each) + low-calorie diet	Baseline and 8 weeks	26	70.3
262	Changes in Ghrelin and Glucagon following a Low Glycemic Load Diet in Women with PCOS.	Hoover SE; Gower BA; Cedillo YE; Chandler-Laney PC; Deemer SE; Goss AM	2021	ClinicalTrials.gov NCT01028989	USA	PCOS	High-income	NICHD, NCATS, NIDDK, UAB Obesity Training Grants	30	Randomized crossover trial	single centre- Clinical Research Unit (CRU) at the University of Alabama at Birmingham	Participants were blinded to diet order	Low glycemic load (GL) diet vs High GL diet 8 weeks each, with washout Solid-meal test at week 4 of each condition Postprandial hormone measures over 4 hours	Hormonal Outcomes Ghrelin, glucagon, glucose, insulin, GLP-1, PYY, cortisol Measured fasting and at 15, 60, 90, 120, 180, 240 minutes Visual Analog Scale (VAS) Participants rated: Hunger Fullness Desire to eat Measured: −15, −5 minutes pre-meal, and 15, 60, 90, 120, 180, 240 minutes post-meal Scores recorded in mm from VAS line. Additional Calculations HOMA-IR: fasting glucose × insulin / 405 AUC…	not reported	22	59.5
263	The effect of a single mega dose injection of vitamin D on serum adiponectin concentration at first gestational diabetes mellitus: A randomized controlled clinical trial	Mahdieh Hosseinzadeh, Elham Razmpoosh, Elham Shareghfarid, Elham Hosseinzadeh, Hossein Hadinedoushan, Maryam-Alsadat Salami, Maryam Khosravi, Maryam Amini, Hassan Mozaffari-Khosravi	2020	IRCT138902113840N1	Iran	GDM	Upper-middle-income	Shahid Sadoughi University of Medical Sciences (postgraduate dissertation funding)	50	Randomized controlled clinical trial	Single centre (Yazd Diabetes Research Centre)	Open-label (no blinding possible due to injectable form; no placebo)	300,000 IU intramuscular vitamin D (calcitriol) 3–10 days postpartum vs no supplementation	Endocrine/metabolic	Not reported	21	56.8
264	Effect of mobile health based peripartum management of gestational diabetes mellitus on postpartum diabetes: A randomized controlled trial	Feiling Huang, Suhan Zhang, Ying Tian, Li Li, Yan Li, Xiaoxia Chen, Xiao Sun, Yanfeng Fan, Weibo Ma, Cuiying Liu, Limin Gao, Xiaowen Xue, Liangkun Ma	2021	NCT03748576	China	GDM	Upper-middle-income	Beijing Municipal Science and Technology Commission (Z161100000516117); Chinese Academy of Medical Sciences (2019XK320007)	309	Parallel, multicentre randomized controlled trial	Nine antenatal institutions across China	Open-label (participants, clinicians unblinded; assessors blinded)	Mobile management (WeChat-based education, diet & exercise monitoring, peer interaction, feedback) vs standard guideline-based management	Clinical (postpartum T2DM incidence) and behavioral (compliance)	Not reported	29	78.4
265	The effect of combined supplementation with vitamin D and omega-3 fatty acids on blood glucose and blood lipid levels in patients with gestational diabetes	Shuzhen Huang, Jifen Fu, Ruxia Zhao, Bin Wang, Meiling Zhang, Lijuan Li, Chun Shi	2021	None reported	China	GDM	Upper-middle-income	None (authors state “Funding: None”)	150	Non-randomized intervention study (self-assigned groups)	Single centre (Haikou Hospital)	None	40,000 IU vitamin D + 8,000 mg omega-3 twice daily for 6 weeks	Metabolic / biochemical outcomes	Not reported	20	54.1
266	Efficacy of vildagliptin for prevention of postpartum diabetes in women with a recent history of insulin-requiring gestational diabetes: A phase II, randomized, double-blind, placebo-controlled study	Sandra Hummel, Andreas Beyerlein, Markus Pfirrmann, Anna Hofelich, Daniela Much, Susanne Hivner, Melanie Bunk, Melanie Herbst, Claudia Peplow, Markus Walter, Denise Kohn, Nadine Hummel, Jürgen Kratzsch, Michael Hummel, Martin Füchtenbusch, Joerg Hasford, Anette-G. Ziegler	2018	EudraCT 2007-000634-39; ClinicalTrials.gov NCT01018602	Germany	GDM	High-income	Forschergruppe Diabetes e.V. (Munich-Neuherberg); Federal Ministry of Education and Research, Germany (FKZ 01GI0805-07); Novartis Pharma provided study drug	113	Phase II randomized, double-blind, placebo-controlled trial	Single-centre (Forschergruppe Diabetes e.V., Munich)	Double-blind (participants, clinicians, and analysts)	Vildagliptin 50 mg twice daily for 24 months + lifestyle counselling vs placebo	Clinical, metabolic	Not reported	32	86.5
267	Retinol-Binding Protein 4 and Insulin Resistance in Polycystic Ovary Syndrome	Samantha K. Hutchison, Cheryce Harrison, Nigel Stepto, Caroline Meyer, Helena J. Teede	2008	ISRCTN51367236	Australia	PCOS	High-income	Competitive CVL grant (Pfizer Australia); Jean Hailes Foundation Grant; metformin supplied by Douglas Pharmaceuticals Australia	38	Randomized controlled trial (open-label; pharmacologic)	Single academic health service (endocrinology/diabetes units)	Open-label (research nurse blinded to allocation for data collection)	Metformin 1 g twice daily vs ethinyl estradiol 35 µg/cyproterone acetate 2 mg oral contraceptive for 6 months	Metabolic, biochemical	Not reported	24	64.9
268	IVF versus ICSI in sibling oocytes from patients with polycystic ovarian syndrome: a randomized controlled trial	Jiann-Loung Hwang, Kok-Min Seow, Yu-Hung Lin, Bih-Chwen Hsieh, Lee-Wen Huang, Heng-Ju Chen, Shih-Chia Huang, Chin-Yu Chen, Pei-Hsin Chen, Chii-Ruey Tzeng	2005	Not registered (pre-trial registration era)	Taiwan	PCOS	High-income	None reported	60	Randomized controlled trial (oocyte-level)	Single tertiary IVF centre	Embryologists assessing embryos blinded to insemination method	ICSI vs conventional IVF on sibling oocytes	Laboratory (fertilization rate, embryo development)	None reported	28	75.7
269	Reasons for participation and non-participation in a diabetes prevention trial among women with prior gestational diabetes mellitus (GDM)	Jennifer J. Infanti, Angela O’Dea, Irene Gibson, Brian E. McGuire, John Newell, Liam G. Glynn, Ciaran O’Neill, Susan B. Connolly, Fidelma P. Dunne	2014	ISRCTN41202110	Ireland	GDM	High-income	Health Research Board (Ireland)	54	Randomised controlled trial (behavioural intervention)	Single-centre (community programme, Galway, Ireland)	Open-label	Croí MyAction 12-week multidisciplinary lifestyle intervention vs standard care	Behavioural / psychosocial	Not specified	19	51.4
270	Vitamin D decreases serum VEGF correlating with clinical improvement in vitamin D-deficient women with PCOS: A randomized placebo-controlled trial	Irani M., Seifer D., Grazi R., Irani S., Rosenwaks Z., Tal R.	2017	Not registered	USA	PCOS	High-income	Maimonides Medical Center Research & Development Foundation	68	Randomized, single-blind, placebo-controlled clinical trial	Single centre (Maimonides Women’s Health Center, NY)	Single-blind (participants blinded; investigators not clearly stated)	Vitamin D3 50,000 IU weekly × 8 weeks vs placebo	Clinical (hirsutism, menses), metabolic (lipids, insulin, HOMA-IR), biochemical (VEGF)	Not reported	25	67.6
271	Astaxanthin treatment ameliorates ER stress in polycystic ovary syndrome patients: a randomized clinical trial.	Jabarpour M; Aleyasin A; Nashtaei MS; Lotfi S; Amidi F	2023	IRCT20201029049183N1 (Iranian Registry of Clinical Trials)	Iran	PCOS	Upper-middle-income	not reported	58	Randomized clinical trial	Single-centre (Tehran University of Medical Sciences)	Triple-blinded (statistician, patients, investigators blinded) Decipherer not part of research team Identical-coded ASX and placebo bottles	Treatment group: Astaxanthin 12 mg/day (oral capsules) for 60 days Control group: Paraffin-filled placebo capsules for 8 weeks Both identical in appearance and packaging	Molecular outcomes: ER stress gene & protein expression (GRP78, CHOP, XBP1, ATF4, ATF6) Oxidative stress markers (TAC in follicular fluid) Clinical and embryological outcomes (oocyte quality, embryo quality, maturity, fertilization rate)	not specified	23	62.2
272	Randomized clinical trial of astaxanthin supplement on serum inflammatory markers and ER stress-apoptosis gene expression in PBMCs of women with PCOS	Masoome Jabarpour; Fardin Amidi; Ashraf Aleyasin; Maryam Shabani Nashtaei; Mojtaba Saedi Marghmaleki	2024	IRCT20201029049183N2	Iran	PCOS	Upper-middle-income	Tehran University of Medical Sciences and Health Services	56	Randomized, double-blind, placebo-controlled trial	Single infertility clinic (Omid Clinic, Tehran)	Double-blind (participants and researchers)	Astaxanthin 12 mg/day orally vs identical placebo for 8 weeks	Inflammatory, molecular, clinical	Not reported	30	81.1
273	Effect of low-dose aspirin on the development of ovarian hyperstimulation syndrome and outcomes of assisted reproductive techniques in women with PCOS: a randomized double-blinded clinical trial	Bahia Namavar Jahromi, Jaleh Zolghadri, Elham Rahmani, Shohreh Alipour, Zahra Anvar, Afsun Zarei, Pegah Keramati	2019	IRCT201105216541N1	Iran	PCOS	Upper-middle-income	Shiraz University of Medical Sciences (Grant ct-89-5522)	232	Double-blind, placebo-controlled randomized clinical trial	Two ART centers (Shiraz Mother & Child Hospital; Bushehr Omid–Persian Gulf Center)	Double-blind (participants + physicians + assessors)	LDA 100 mg/day starting day 21 of prior cycle until oocyte retrieval vs identical placebo	Clinical (OHSS incidence, pregnancy); embryologic (fertilization rate, embryo quality)	Not reported	27	73
274	Comparison of myo-inositol and metformin on clinical, metabolic and genetic parameters in polycystic ovary syndrome: A randomized controlled clinical trial	Mehri Jamilian, Pegah Farhat, Fatemeh Foroozanfard, Faraneh Afshar Ebrahimi, Esmat Aghadavod, Fereshteh Bahmani, Bita Badehnoosh, Hamidreza Jamilian, Zatollah Asemi	2017	IRCT201701295623N105	Iran	PCOS	Upper-middle-income	None reported	60	Parallel-group RCT	Single endocrine/gynecology clinic	Open-label after randomization (no placebo)	Myo-inositol 2 g + folic acid 200 µg twice daily vs metformin 500 mg three times daily; 12 weeks	Hormonal, inflammatory, gene-expression biochemical outcomes	None used	31	83.8
275	Effect of Two Different Doses of Vitamin D Supplementation on Metabolic Profiles of Insulin-Resistant Patients with Polycystic Ovary Syndrome	Mehri Jamilian; Fatemeh Foroozanfard; Elham Rahmani; Maesoomeh Talebi; Fereshteh Bahmani; Zatollah Asemi	2017	IRCT201604145623N75	Iran	PCOS	Upper-middle-income	Vice-chancellor for Research, Arak University of Medical Sciences	90	Randomized double-blind placebo-controlled trial	Single referral PCOS clinic	Double-blind	Vitamin D3 4000 IU/day vs 1000 IU/day vs placebo for 12 weeks (all groups received metformin 1500 mg/day)	Hormonal, metabolic, inflammatory, oxidative	Not reported	26	70.3
276	The effects of probiotic and selenium co-supplementation on parameters of mental health, hormonal profiles, and biomarkers of inflammation and oxidative stress in women with polycystic ovary syndrome.	Jamilian M; Mansury S; Bahmani F; Heidar Z; Amirani E; Asemi Z	2018	IRCT20170513033941N22	Iran	PCOS	Upper-middle-income	Research Deputy of Arak University of Medical Sciences (AUMS)	60	Randomized, double-blind, placebo-controlled clinical trial	Referral clinic (Kosar Clinic, Arak, Iran)	Participants and investigators	Probiotic 8 × 10⁹ CFU/day (L. acidophilus, L. reuteri, L. fermentum, B. bifidum) + Selenium 200 μg/day for 12 weeks	Hormonal, mental health, inflammatory, oxidative stress	Not reported	33	89.2
277	A Randomized Double-Blinded, Placebo-Controlled Trial Investigating the Effect of Fish Oil Supplementation on Gene Expression Related to Insulin Action, Blood Lipids, and Inflammation in Gestational Diabetes Mellitus	Mehri Jamilian, Mansooreh Samimi, Naghmeh Mirhosseini, Faraneh Afshar Ebrahimi, Esmat Aghadavod, Mohsen Taghizadeh, Zatollah Asemi	2018	IRCT201610015623N90	Iran	GDM	Upper-middle-income	Vice-Chancellor for Research, Arak University of Medical Sciences	40	Double-blind, randomized, placebo-controlled trial	Single-centre (Arak University of Medical Sciences)	Double-blind (participants, investigators, analysts)	1000 mg fish oil (180 mg EPA + 120 mg DHA) twice daily for 6 weeks vs placebo	Clinical and biochemical	Not reported	24	64.9
278	The effects of magnesium-zinc-calcium-vitamin D co-supplementation on biomarkers of inflammation, oxidative stress and pregnancy outcomes in gestational diabetes	Mehri Jamilian, Naghmeh Mirhosseini, Masoumeh Eslahi, Fereshteh Bahmani, Maryam Shokrpour, Maryam Chamani, Zatollah Asemi	2019	IRCT201704225623N109	Iran	GDM	Upper-middle-income	Research Deputy of Arak University of Medical Sciences (Grant No. 1395.408)	60	Randomized double-blind placebo-controlled trial	Single-centre antenatal clinic (Kosar Clinic, Arak)	Double-blind (participants and investigators)	Magnesium 100 mg + zinc 4 mg + calcium 400 mg + vitamin D 200 IU, twice daily for 6 weeks vs placebo	Biochemical, pregnancy	Not reported	29	78.4
279	The effects of magnesium supplementation on abnormal uterine bleeding, alopecia, quality of life, and acne in women with polycystic ovary syndrome: a randomized clinical trial.	Jaripur M; Ghasemi-Tehrani H; Askari G; Gholizadeh-Moghaddam M; Clark CCT; Rouhani MH	2022	IRCT20130903014551N9	Iran	PCOS	Upper-middle-income	not mentioned	64	Parallel-group randomized clinical trial	Single-centre (Shahid Beheshti Obstetrics & Gynecology Hospital, Isfahan)	Double-blind (participants + outcome assessors)	Magnesium oxide 250 mg/day for 10 weeks vs placebo (starch tablet)	Categorical & continuous clinical outcomes (AUB, alopecia, acne score, QoL)	not reported	28	75.7
280	A comparison between the effects of metformin and N-acetyl cysteine (NAC) on some metabolic and endocrine characteristics of women with polycystic ovary syndrome	Forough Javanmanesh, Maryam Kashanian, Maryam Rahimi, Narges Sheikhansari	2016 (online 2015)	IRCT201405082624N15	Iran	PCOS	Upper-middle-income	Not reported (no conflicts; no financial relationships declared)	120	Randomized, double-blind, placebo-controlled clinical trial	Two teaching hospitals (Akbarabadi & Shariati, Tehran)	Double-blind (participants + investigators)	NAC 600 mg TID × 24 weeks vs metformin 500 mg TID × 24 weeks	Clinical & biochemical (BMI, AUB, FBS, insulin, HOMA, lipid profile)	No	33	89.2
281	A Randomized, Controlled Trial of Vitamin D Supplementation on Cardiovascular Risk Factors, Hormones, and Liver Markers in Women with Polycystic Ovary Syndrome	Zeeshan Javed, Maria Papageorgiou, Harshal Deshmukh, Eric S. Kilpatrick, Vincent Mann, Lynsey Corless, George Abouda, Alan S. Rigby, Stephen L. Atkin, Thozhukat Sathyapalan	2019	NCT02513381	United Kingdom	PCOS	High-income	No external funding; vitamin D and placebo supplied by Internis Pharmaceuticals Ltd.	40	Randomized double-blind placebo-controlled trial	Single academic medical center (Hull University Teaching Hospitals NHS Trust)	Double-blind (participants and investigators)	Vitamin D3 3200 IU/day orally for 3 months vs matched placebo	Metabolic, hormonal, hepatic	Not reported	31	83.8
282	Effects of an Eating Pattern Including Colorful Fruits and Vegetables on Management of Gestational Diabetes: A Randomized Controlled Trial	Kataryna Jaworsky, Pamela DeVillez, James M. Alexander, Arpita Basu	2023	ClinicalTrials.gov NCT04861324	United States	GDM	High-income	NIH (NIGMS GM103440) and UNLV School of Integrated Health Sciences Dean’s Faculty Development Award	38	Parallel, 2-arm, randomised controlled trial	Single-centre (UNLV Maternal-Fetal Medicine Clinic, Sunrise Hospital, Las Vegas)	Open-label (participants unblinded; analysts blinded)	Daily addition of 1 cup berries + 1 cup leafy vegetables + postprandial walking vs standard nutrition education (USDA guidelines)	Clinical, biochemical, behavioural	Not reported	29	78.4
283	Impact of electro-acupuncture and physical exercise on hyperandrogenism and oligo/amenorrhea in women with polycystic ovary syndrome: a randomized controlled trial	Elizabeth Jedel; Fernand Labrie; Anders Odén; Göran Holm; Lars Nilsson; Per Olof Janson; Anna-Karin Lind; Claes Ohlsson; Elisabet Stener-Victorin	2011	ClinicalTrials.gov NCT00484705	Sweden	PCOS	High-income	Swedish Medical Research Council; Novo Nordisk Foundation; Osher Center for Integrative Medicine; multiple Swedish foundations	84	Randomized controlled trial (3-arm, parallel)	University hospital & academic research centre	Open-label (participants/practitioners); outcome assessors blinded	Low-frequency electro-acupuncture (14 sessions/16 wks) vs structured physical exercise vs no active intervention	Hormonal, reproductive, clinical	Not reported	34	91.9
284	Short term monotherapy with GLP-1 receptor agonist liraglutide or PDE 4 inhibitor roflumilast is superior to metformin in weight loss in obese PCOS women: a pilot randomized study.	Jensterle M; Salamun V; Kocjan T; Vrtacnik Bokal E; Janez A	2015	NCT02187250	Slovenia	PCOS	High-income	Ministry of Health, Republic of Slovenia (Tertiary Care Scientific Grant No. 20120047); Takeda and Novo Nordisk did not participate in study conduct.	45	Prospective, randomized, open-label, parallel-group pilot trial.	Single academic tertiary endocrine and gynecology center.	None (open-label).	MET: Metformin 1000 mg twice daily. LIRA: Liraglutide 1.2 mg subcutaneously once daily (titrated from 0.6 mg). ROF: Roflumilast 500 μg once daily. Duration: 12 weeks.	Anthropometric (weight, BMI, waist circumference, VAT); metabolic (OGTT glucose, insulin, HOMA-IR); endocrine (androgens); menstrual outcomes.	NR	22	59.5
285	A 12-week treatment with the long-acting glucagon-like peptide 1 receptor agonist liraglutide leads to significant weight loss in a subset of obese women with newly diagnosed polycystic ovary syndrome	Mojca Jensterle, Nika Aleksandra Kravos, Marija Pfeifer, Tomaz Kocjan, Andrej Janez	2015	NCT01899430	Slovenia	PCOS	High-income	University Medical Center Ljubljana grant (No. 20120047)	32	Prospective randomized controlled trial	Single-centre university medical center (endocrinology clinic)	Open-label	Liraglutide 1.2 mg SC daily vs metformin 1000 mg BID orally for 12 weeks	Anthropometric, metabolic, hormonal	Not reported	24	64.9
286	Efficacy and safety of acupuncture on oligomenorrhea due to polycystic ovary syndrome: An international multicenter, pilot randomized controlled trial.	Xinlu Ji, Jian Chen, Ping Xu, Shanmei Shen, Yan Bi	2022	NCT03336840	China	PCOS	Upper-middle-income	National Natural Science Foundation of China (81770819, 82030026, 81570736)	60	Randomized controlled clinical trial	Single tertiary endocrine/metabolic clinic (Nanjing Drum Tower Hospital)	No blinding (open-label)	Probiotics: 4 g/day powder. Metformin: 1500 mg/day (500 mg TID). Combination: Both interventions. Duration 12 weeks.	Clinical (menstrual recovery, ovulation); metabolic (FBG, FINS, HOMA-IR, lipids); hormonal (AMH, SHBG, FAI, testosterone, DHEAS); anthropometric	No	21	56.8
287	Therapeutic effects of dimethyldiguanide combined with clomifene citrate in the treatment of polycystic ovary syndrome	Jingjing Jiang, Shanshan Gao, Yang Zhang	2019	Not reported	China	PCOS	Upper-middle-income	Not reported	79	Randomized controlled trial (parallel)	Single-centre reproductive medicine hospital	Open-label	Dimethyldiguanide (long-acting metformin 2.5 g/day) + clomifene citrate (50 mg/day, days 3–7) vs clomifene citrate alone; hCG trigger when follicle ≥20 mm	Reproductive, hormonal, molecular	Not reported	19	51.4
288	Effect of light fasting diet therapy on lipid metabolism and sex hormone levels in patients with polycystic ovary syndrome combined with infertility	Xiaomei Jiang, Yongfeng Wang, Hong Tang, Jin Ma, Heyue Li	2025	Not reported (ethics approval: 2024-7th-HIRB-023)	China	PCOS	Upper-middle-income	Shanghai Pudong New Area Health Commission; Seventh People’s Hospital TCM Talent Program	104	Randomized controlled trial (open-label)	Single center (Seventh People’s Hospital of Shanghai Univ. of TCM)	Open-label	Light fasting diet therapy ± flaxseed powder: flaxseed 20 g twice daily; fasting days 600 kcal/day; light-fasting −500 kcal/day; 2-month intervention (1-month fasting protocol + 1-month normal diet)	Clinical (anthropometric, hormonal), metabolic (lipid/glucose)	Not reported	23	62.2
289	Effects of the original Gymnastics for Pregnant Women program on glycaemic control and delivery outcomes in women with gestational diabetes mellitus: A randomized controlled trial	Ying Jin; Zhengfei Chen; Junqin Li; Wei Zhang; Suwen Feng	2022	ChiCTR2000033963	China	GDM	Upper-middle-income	Zhejiang Provincial Medical & Health Science and Technology Plan Project	131	Parallel RCT	Single tertiary maternity hospital	Participants unblinded; physicians & lab staff blinded	15-min Gymnastics for Pregnant Women program 10–13×/week + standard GDM care vs standard GDM care	Clinical (glycaemic outcomes, maternal/neonatal)	Not reported	28	75.7
290	Weight Reduction Through a Cognitive Behavioral Therapy Lifestyle Intervention in PCOS: The Primary Outcome of a Randomized Controlled Trial	Jiskoot G., Timman R., Beerthuizen A., Dietz de Loos A., Busschbach J., Laven J.	2020	NTR2450	Netherlands	PCOS	High-income	Institutional grant for PhD position; no commercial funders	183	Randomized controlled trial (three-arm)	Single academic reproductive endocrinology center (Erasmus MC)	No blinding of participants or providers; outcome measurement structured but unblinded	(1) 20 CBT + diet + exercise group sessions over 12 months; (2) same + tailored SMS for 9 months; (3) Care-as-usual weight-loss advice only	Clinical (weight/BMI), behavioral (lifestyle adherence), anthropometric	Not used	35	94.6
291	Acupuncture for ovulation induction in polycystic ovary syndrome: a randomized controlled trial	Julia Johansson; Leanne Redman; Paula P. Veldhuis; Antonina Sazonova; Fernand Labrie; Göran Holm; Gudmundur Johannsson; Elisabet Stener-Victorin	2013	ClinicalTrials.gov NCT00921492	Sweden	PCOS	High-income	Swedish Research Council; Novo Nordisk Foundation; LUA/ALF agreement; multiple Swedish foundations; NIH support for investigator	32	Prospective randomized controlled trial	Single university research center	Investigators blinded; participants not blinded	Acupuncture with manual + low-frequency electrical stimulation twice weekly for 10–13 weeks vs attention-control therapist meetings	Reproductive, hormonal, metabolic	Not reported	33	89.2
292	PCOSMIC: A multi-centre randomized trial in women with polycystic ovary syndrome evaluating metformin for infertility with clomiphene	N.P. Johnson, A.W. Stewart, J. Falkiner, C.M. Farquhar, S. Milsom, V-P. Singh, Q.L. Okonkwo, K.L. Buckingham	2010	NCT00795808	New Zealand	PCOS	High-income	Auckland Medical Research Foundation; Mercia Barnes Trust; University of Auckland Research Committee	171	Multicentre double-blind placebo-controlled RCT	4 New Zealand fertility centres	Double-blind (participants, clinicians, pharmacists)	BMI>32: metformin vs placebo; BMI≤32: CC vs metformin vs combination	Clinical reproductive (pregnancy rate, LBR), safety	None reported	36	97.3
293	Brain reactivity during aggressive response in women with premenstrual dysphoric disorder treated with a selective progesterone receptor modulator	Kaltsouni E., Fisher P.M., Dubol M., Hustad S., Lanzenberger R., Frokjaer V.G., Wikström J., Comasco E., Sundström-Poromaa I.	2021	EUDRA-CT 2016-001719-19 (ethics approval noted); parent RCT published in Am J Psychiatry (Comasco et al., 2021)	Sweden	PMDD	High-income	Swedish Research Council; Swedish Society of Medicine; Swedish Brain Foundation; EU FP7; Science for Life Lab; Gedeon Richter supplied study drug	35	Double-blind placebo-controlled randomized trial (neuroimaging substudy of RCT)	Single-center (Uppsala University)	Double-blind (participants, investigators, assessors)	Ulipristal acetate 5 mg/day for 3 months vs placebo	Neuroimaging (BOLD fMRI), behavioral (aggression task), clinical (DRSP symptoms), hormonal (LC-MS/MS)	Not reported	30	81.1
294	White matter volume and treatment with selective progesterone receptor modulator in patients with premenstrual dysphoric disorder	Elisavet Kaltsouni, Johan Wikström, Rupert Lanzenberger, Inger Sundström-Poromaa, Erika Comasco	2024	EUDRA-CT 2016-001719-19	Sweden	PMDD	High-income	Swedish Research Council; Swedish Society of Medicine; Swedish Brain Foundation; SciLifeLab	35	Double-blind RCT	Single academic center (Uppsala University)	Double-blind	Ulipristal acetate 5 mg/day vs placebo for 3 cycles	Neuroimaging (WMV), clinical (DRSP symptoms), hormonal (estradiol, progesterone)	Not used	31	83.8
295	White matter integrity upon progesterone antagonism in individuals with PMDD: A randomized placebo-controlled DTI study	Kaltsouni E, Gu X, Wikström J, Hahn A, Lanzenberger R, Sundström-Poromaa I, Comasco E	2025	EUDRA-CT 2016-001719-19	Sweden	PMDD	High-income	Swedish Research Council; Swedish Society of Medicine; Swedish Brain Foundation	35	Double-blind randomized placebo-controlled RCT	Multicentre (4 Swedish university hospitals)	Double-blind (participants, investigators, raters)	Ulipristal acetate 5 mg/day vs placebo × 3 months	Neuroimaging (DTI: FA, MD, RD, AD) + clinical symptoms	Not reported	32	86.5
296	Ultralong administration of gonadotropin-releasing hormone agonists before inÂ vitro fertilization improves fertilization rate but not clinical pregnancy rate in women with mild endometriosis: a prospective, randomized, controlled trial.	Kaponis A; Chatzopoulos G; Paschopoulos M; Georgiou I; Paraskevaidis V; Zikopoulos K; Tsiveriotis K; Taniguchi F; Adonakis G; Harada T	2020	NCT01269125	Greece & Japan	Endometriosis	High-income	Three tertiary university hospitals: Patras (Greece), Ioannina (Greece), Tottori (Japan)	400	Prospective, randomized, controlled clinical trial	Multicenter (3 tertiary university hospitals)	None (open-label)	Group A: GnRH agonist (Leuprolide 3.75 mg depot) every 28 days × 3 months before IVF Group B: Immediate IVF without GnRH-a pretreatment Group C: Tubal infertility controls (no endometriosis)	Biological (cytokine levels) Clinical (FR, IR, PR, embryo quality)	not reported	27	73
297	Clomiphene citrate, metformin or a combination of both as the first line ovulation induction drug for Asian Indian women with polycystic ovarian syndrome: A randomized controlled trial	Sujata Kar, Smriti Sanchita	2015	Not reported	India	PCOS	Lower-middle-income	None (no financial support; no conflicts)	105	3-arm parallel RCT	Single private hospital (Bhubaneswar)	Unblinded	CC 50–150 mg; Metformin 1700 mg/d; Combination regimen; 6-month follow-up	Clinical reproductive outcomes	None reported	24	64.9
298	Free fatty acid binding protein-4 and retinol binding protein-4 in polycystic ovary syndrome: response to simvastatin and metformin therapies.	Karakas SE; Banaszewska B; Spaczynski RZ; Pawelczyk L; Duleba A	2013	NCT00396513	Poland	PCOS	High-income	Polish State Committee for Scientific Research; NICHD (R01 HD050656); NCCAM (AT002280); ALSAM Foundation. No conflicts declared.	62	Randomized, parallel-group, open-label clinical trial with three intervention arms	Multicentre academic hospitals.	NR	Metformin: 850 mg twice daily; Simvastatin: 20 mg daily; Combination: both agents. Treatment duration 3 months.	Metabolic and endocrine biomarkers (FABP4, RBP4, insulin resistance indices, lipids, inflammatory markers).	NR	26	70.3
299	A Randomized Trial of Stair-Step Letrozole versus Traditional Letrozole for Subfertile Women with Polycystic Ovary Syndrome.	Karakaya S; Kumtepe Y; Al RA; Senocak G; YÄ±lmaz E	2025	not reported	Turkey	PCOS	Upper-middle-income	not reported	80	Prospective randomized controlled trial	Single center (Infertility and ART Center, Atatürk University)	not blinded	Letrozole stair-step protocol vs. traditional letrozole protocol	Primary: follicle development time; Secondary: ovulation, mature follicle count, endometrial thickness, pregnancy rate, side effects	not reported	29	78.4
300	Calcium plus vitamin D supplementation affects pregnancy outcomes in gestational diabetes: randomized, double-blind, placebo-controlled trial	Maryam Karamali, Zatollah Asemi, Maedeh Ahmadi-Dastjerdi, Ahmad Esmaillzadeh	2015	IRCT201407115623N23	Iran	GDM	Upper-middle-income	Vice-Chancellor for Research, Arak University of Medical Sciences (Grant 92–158)	60	Parallel, double-blind, placebo-controlled RCT	Single-centre (Arak University of Medical Sciences)	Double-blind (participants, clinicians, analysts)	Ca carbonate 1000 mg daily + two pearls vitamin D3 (50,000 IU at baseline and day 21) for 6 weeks vs matched placebo	Clinical (maternal and neonatal outcomes)	Not reported	31	83.8
301	Effects of probiotic supplementation on glycaemic control and lipid profiles in gestational diabetes: A randomized, double-blind, placebo-controlled trial	M. Karamali, F. Dadkhah, M. Sadrkhanlou, M. Jamilian, S. Ahmadi, M. Tajabadi-Ebrahimi, P. Jafari, Z. Asemi	2016	IRCT201601035623N63	Iran	GDM	Upper-middle-income	Vice Chancellor for Research, Iran University of Medical Sciences	60	RCT (double-blind, placebo-controlled)	Single outpatient clinic (Kosar Clinic, Arak)	Double-blind (participants, investigators, lab)	Probiotic capsule: L. acidophilus, L. casei, B. bifidum (each 2×10⁹ CFU) daily ×6 weeks vs cellulose placebo	Glycaemic/metabolic	Not reported	32	86.5
302	The effects of coenzyme Q10 supplementation on metabolic profiles and parameters of mental health in women with polycystic ovary syndrome	Maryam Karamali, Masoumeh Gholizadeh	2022 (online 2021)	IRCT20170513033941N36	Iran	PCOS	Upper-middle-income	Iran University of Medical Sciences (Grant 97102)	55	Randomized, double-blind, placebo-controlled clinical trial	Single gynecology clinic (Akbarabadi Clinic, Tehran)	Double-blind (participants + investigators)	CoQ10 100 mg/day vs placebo for 12 weeks; identical appearance; adherence checked with pill count and phone calls	Biochemical, oxidative stress, endocrine, and mental health outcomes	Not used	30	81.1
303	The effect of synbiotics supplementation on anthropometric indicators and lipid profiles in women with polycystic ovary syndrome: a randomized controlled trial	Elham Karimi; Javad Heshmati; Nooshin Shirzad; Samira Vesali; Mohammad Javad Hosseinzadeh-Attar; Ashraf Moini; Mahdi Sepidarkish	2020	IRCT2014110515536N2	Iran	PCOS	Upper-middle-income	No external funding reported	99	Randomized, double-blind, placebo-controlled trial	Single tertiary women’s hospital (Arash Hospital, Tehran)	Double-blind (participants and investigators)	Synbiotics capsule (500 mg multi-strain probiotics + inulin) daily vs identical placebo for 12 weeks	Metabolic (lipids), anthropometric	Not reported	33	89.2
304	An assessment of lifestyle modification versus medical treatment with clomiphene citrate, metformin, and clomiphene citrate-metformin in patients with polycystic ovary syndrome.	Karimzadeh MA; Javedani M	2010	not mentioned	Iran	PCOS	Upper-middle-income	not mentioned	343	Prospective randomized double-blind study	University-based infertility clinic and research center (Yazd Shahid Sadoughi University of Medical Sciences)	Double-blind stated, but method not detailed	1) Clomiphene citrate 100 mg days 3–7; 2) Metformin 500→1500 mg/day over 3 weeks for 3–6 months; 3) Clomiphene + Metformin; 4) Lifestyle modification (low-calorie diet 500 kcal deficit + exercise 20–60 min, 3–5 times/week)	Menstrual cycle regulation, waist circumference, lipid profile, insulin, testosterone, SHBG, clinical pregnancy	not specified	24	64.9
305	Effects of protein versus simple sugar intake on weight loss in polycystic ovary syndrome (according to the National Institutes of Health criteria).	Kasim-Karakas SE; Almario RU; Cunningham W	2009	not stated	USA	PCOS	High-income	California Dairy Research Foundation, ALSAM Foundation, Glanbia Foods (supplements provided), University of California-Davis Clinical and Translational Science Center Country: USA	33	Randomized controlled trial (RCT), single-blinded	Single centre- University PCOS clinic (University of California-Davis)	Single-blinded (participants and dietitians blinded to supplement type)	Hypocaloric diet (-450 kcal/day) + 240 kcal/day supplement of whey protein vs simple sugars	Clinical (weight, BMI, fat mass, lean mass), biochemical (leptin, adiponectin, cholesterol, HDL, Apo B, insulin, glucose, HOMA, hs-CRP, sex steroids)	not reported	22	59.5
306	Mechanisms of action of duodenal mucosal resurfacing in insulin-resistant women with polycystic ovary syndrome	Vasha Kaur, Georgios K. Dimitriadis, Belen Pérez-Pevida, Davinder Singh Bansi, Channa Jayasena, Danielle Bate, Rhian Houghton, Barbara Fielding, Danai Balfoussia, Lisa Webber, Yun Miao, Frederick Mears, Nicola Jackson, Lucy Coppin, Jeremiah Perez, Megan Williams, Brett Johnson, Anne M. Umpleby, Harpal S. Randeva, Alexander D. Miras	2021	ISRCTN76278694	UK	PCOS	High-income	Fractyl investigator-initiated research programme; NIHR support	32	Randomized, double-blind, sham-controlled trial	Two-centre (Imperial College London; Coventry & Warwickshire)	Double-blind (participants + study staff; endoscopist unblinded)	Duodenal mucosal resurfacing (DMR) + lifestyle vs sham endoscopy + lifestyle	Metabolic, reproductive	Not reported	29	78.4
307	Comparative effects of atorvastatin and simvastatin on plasma total homocysteine levels in women with polycystic ovary syndrome: a prospective randomized study	Cemil Kaya, Sevim Dinçer Cengiz, Bulent Berker, Selda Demirtaş, Mustafa Cesur, Gürbüz Erdoğan	2009	None reported	Turkey	PCOS	Upper-middle-income	None reported	52	Prospective randomized clinical trial	University hospital (Gynecology + Endocrinology departments, Ankara)	Open-label	Atorvastatin 20 mg/day vs Simvastatin 20 mg/day for 12 weeks	Metabolic (Hcy, insulin, HOMA, lipids), endocrine (T, free T), vitamin B12	No	21	56.8
308	Metformin improves endothelial function and carotid intima media thickness in patients with PCOS	Mehmet Gungor Kaya, Sumeyra Yildirim, Bekir Calapkorur, Mahmut Akpek, Kursad Unluhizarci, Fahrettin Kelestimur	2015	Not reported	Turkey	PCOS	Upper-middle-income	Not reported	50	Randomized controlled trial (parallel; open-label)	Single-centre university hospital (endocrinology & cardiology departments)	Open-label	Drospirenone/ethinyl estradiol OCP alone vs OCP + metformin 850 mg twice daily for 6 months	Vascular, metabolic, hormonal	Not reported	20	54.1
309	A Comparison of a Pulse-Based Diet and the Therapeutic Lifestyle Changes Diet in Combination with Exercise and Health Counselling on the Cardio-Metabolic Risk Profile in Women with PCOS: A Randomized Controlled Trial	Kazemi M., McBreairty L.E., Chizen D.R., Pierson R.A., Chilibeck P.D., Zello G.A.	2018	NCT01288638	Canada	PCOS	High-income	Not specified; academic research at Univ. of Saskatchewan	95	Randomized controlled trial; single-blind (investigators blinded)	Single centre (University of Saskatchewan)	Single-blind (investigators/data analysts blinded; participants not blinded)	Pulse-based diet (2 pulse meals/day) vs TLC diet; both groups also received aerobic exercise & monthly counselling	Clinical, metabolic, dietary, anthropometric	Not reported	34	91.9
310	A pulse-based diet and the Therapeutic Lifestyle Changes diet in combination with health counseling and exercise improve health-related quality of life in women with polycystic ovary syndrome: secondary analysis of a randomized controlled trial	Maryam Kazemi, Laura E. McBreairty, Gordon A. Zello, Roger A. Pierson, Julianne J. Gordon, Shani B. Serrao, Philip D. Chilibeck, Donna R. Chizen	2020	NCT01288638	Canada	PCOS	High-income	Agriculture and Agri-Food Canada; Saskatchewan Pulse Growers; Canada Foundation for Innovation; University of Saskatchewan internal support	95	Multidimensional single-blind, metformin-stratified, parallel-group RCT	University-based clinical research centre	Single-blind (assessors blinded); participants unblinded	Group 1: Pulse-based diet (lentils/chickpeas/beans/split peas), 2 meals/day × 16 wks. Group 2: TLC diet per NCEP guidelines. Both groups: structured aerobic exercise (5×/wk, 45 min/day) + monthly counselling	HRQoL (PCOS-specific questionnaire; 6 domains); metabolic (weight, HOMA-IR, TT, LH/FSH)	No	33	89.2
311	Randomized double blind clinical trial evaluating the Ellagic acid effects on insulin resistance, oxidative stress and sex hormones levels in women with polycystic ovarian syndrome	Mahnaz Kazemi, Fatemeh Lalooha, Mohammadreza Rashidi Nooshabadi, Fariba Dashti, Maria Kavianpour, Hossein Khadem Haghighian	2021	IRCT20141025019669N12 (retrospective registration 07-07-2019)	Iran	PCOS	Upper-middle-income	Qazvin University of Medical Sciences; Ministry of Health & Medical Education Grant IR.QUMS.REC.1398.033	60	Randomized double-blind placebo-controlled clinical trial	Single centre (Kosar Hospital Specialist Center, Qazvin)	Double-blind for patient, researcher, physician	200 mg/day ellagic acid capsule vs placebo for 8 weeks	Laboratory biomarkers (glucose, insulin, IR, lipids, oxidative stress, inflammatory markers, hormones)	Not stated	27	73
312	Effects of metformin plus simvastatin on polycystic ovary syndrome: a prospective, randomized, double-blind, placebo-controlled study	Talieh Kazerooni; Azam Shojaei-Baghini; Sedigheh Dehbashi; Nasrin Asadi; Fariborz Ghaffarpasand; Yasaman Kazerooni	2010	Not reported	Iran	PCOS	Upper-middle-income	No external funding reported	84	Prospective randomized double-blind placebo-controlled trial	University hospital infertility clinic	Double-blind (participants and investigators)	Metformin 500 mg TID + simvastatin 20 mg/day vs metformin 500 mg TID + placebo for 12 weeks	Hormonal, metabolic, clinical	Not reported	32	86.5
313	Hybrid argon plasma coagulation (HybridAPC) versus sharp excision for the treatment of endometriosis: a prospective randomized clinical trial.	Keckstein JS; Keckstein S; Brunecker K; Neugebauer A; NÃ¼ssle D; Hoffmann S; Andress J; Neis F; Scharpf M; Enderle M; Rothmund R; Brucker SY; Jun MW; Kraemer B	2023	German Clinical Trials Registry DRKS00011313	Germany	Endometriosis	High-income	Erbe Elektromedizin GmbH. Open-access funded by Projekt DEAL.	39	Prospective, randomized, controlled, single-blinded clinical trial (patients blinded; surgeons not). Randomization at lesion level.	Single centre	Single-blinded: Pathologist assessing histology was blinded; surgeons were not. Participants were unaware of which technique was used.	HybridAPC: Needle-free waterjet elevation followed by argon plasma coagulation (APC2 system, 25 W, argon 1 L/min). Sharp excision: Standard laparoscopic scissors + bipolar coagulation (60 W).	Histologic eradication (primary), adhesions (secondary), operative time, complications.	NR	28	75.7
314	Role of suppression of endometriosis with progestins before IVF-ET: a non-inferiority randomized controlled trial	Eissa Khalifa, Hashem Mohammad, Ameer Abdullah, Mazen Abdel-Rasheed, Mohammed Khairy, Mahmoud Hosni	2021	NCT04500743	Egypt	Endometriosis	Lower-middle-income	No specific funding grant; institution-supported	134	Randomized parallel-group open-label non-inferiority RCT	Single centre (Minia Infertility Research Unit, Egypt)	Participants and clinicians unblinded; oocyte retrieval + ET physicians blinded	3 months GnRHa depot vs 3 months Dienogest 2 mg/day (with short GnRH-a in last 3 weeks), followed by IVF	Clinical/embryologic + QoL outcomes	Not reported	34	91.9
315	Magnesium retention and mood effects after intravenous magnesium infusion in premenstrual dysphoric disorder	Khursheed Khine, Donald L. Rosenstein, Ronald J. Elin, Julie E. Niemela, Peter J. Schmidt, David R. Rubinow	2006	Not registered (pre-2007 study)	USA	PMDD	High-income	Intramural funding, National Institute of Mental Health (NIMH), NIH, USA	31	Randomised double-blind placebo-controlled crossover (PMDD subgroup) following open-label phase	Single-centre (NIMH Behavioral Endocrinology Branch)	Double-blind crossover (participants and assessors blinded)	IV magnesium sulfate 0.1 mmol/kg in 5% dextrose over 4 hours vs placebo (dextrose only)	Clinical (biochemical + mood)	Not reported	23	62.2
316	Two weeks of metformin improves clomiphene citrate-induced ovulation and metabolic profiles in women with polycystic ovary syndrome.	Khorram O; Helliwell JP; Katz S; Bonpane CM; Jaramillo L	2006	not reported	USA	PCOS	High-income	not reported	31	Randomized prospective clinical trial	Single-centre (university-based medical center)	None (open-label)	CC 100 mg/day (cycle days 5–9) vs. CC 100 mg/day + Metformin 500 mg TID (cycle days 1–14)	Clinical, biochemical, and metabolic outcomes (ovulation, hormonal markers, metabolic indicators, pregnancy)	not reported	21	56.8
317	Effects of probiotic supplements on insulin resistance in gestational diabetes mellitus: A double-blind randomized controlled trial	A. Kijmanawat, P. Panburana, S. Reutrakul, C. Tangshewinsirikul	2019	TCTR20160701001	Thailand	GDM	Upper-middle-income	Faculty of Medicine Ramathibodi Hospital, Mahidol University	60	Double-blind, placebo-controlled RCT	Single tertiary hospital diabetes-in-pregnancy clinic	Double-blind (participants, clinicians, outcome assessors)	Daily probiotic capsules (Lactobacillus acidophilus, L. casei, Bifidobacterium bifidum) vs placebo from enrollment to delivery	Metabolic (HOMA-IR, glucose, insulin), maternal, neonatal	Not reported	31	83.8
318	Inflammatory-metabolic parameters in obese and nonobese normoandrogenemic polycystic ovary syndrome during metformin and oral contraceptive treatment	Sevtap Kilic, Nafiye Yilmaz, Ebru Zulfikaroglu, Gokcen Erdogan, Murat Aydin, Sertac Batioglu	2011	Not reported	Turkey	PCOS	Upper-middle-income	None declared	96	Randomized controlled double-blind clinical trial	Single women’s health research hospital + associated biochemistry lab	Double-blind	MET: 850 mg BID × 6 months; OCP: ethinyl estradiol 0.03 mg + desogestrel 0.15 mg daily × 6 months; all participants also received B-complex vitamins	Clinical (BMI, waist); metabolic (HOMA-IR, Hcy, ADMA, hs-CRP); endocrine	Not reported	29	78.4
319	Effects of pioglitazone on ovarian stromal blood flow, ovarian stimulation, and in vitro fertilization outcome in patients with polycystic ovary syndrome.	Kim CH; Jeon GH; Kim SR; Kim SH; Chae HD; Kang BM	2010	not reported	South Korea	PCOS	High-income	not reported	60	Randomized, placebo-controlled trial (RCT)	Single-centre (university infertility unit)	Patient-blinded (placebo used). Investigator blinding not clearly described.	Pioglitazone 30 mg daily from oral contraceptive start to hCG day vs. placebo Both groups underwent identical IVF stimulation.	Clinical, hormonal, sonographic, embryological	not reported	24	64.9
320	Acute progesterone feedback on gonadotropin secretion is not demonstrably altered in estradiol-pretreated women with polycystic ovary syndrome	Su Hee Kim, Jessica A. Lundgren, James T. Patrie, Christine M. Burt Solorzano, Christopher R. McCartney	2022	ClinicalTrials.gov NCT00594217	USA	PCOS	High-income	NIH (NICHD R01 HD058671, P50 HD28934, R01 HD102060, K23 HD098319, F32 HD091951)	24	Randomized double-blind placebo-controlled crossover RCT	University Clinical Research Unit	Double-blind (participants & investigators)	Estradiol pretreatment 0.2 mg/day × 3 days then 100 mg oral micronized progesterone vs placebo at 06:00 during a 24-h frequent sampling protocol (each woman received both conditions in separate cycles)	Endocrine (LH pulse frequency, LH pulse mass, pulsatile LH secretion; FSH; sex steroids)	No	30	81.1
321	Impact of Estetrol Combined with Drospirenone on Blood Coagulation and Fibrinolysis in Patients with Endometriosis	Takao Kobayashi, Masashi Hirayama, Masayoshi Nogami, Kanna Meguro, Masato Iiduka, Jean-Michel Foidart, Jonathan Douxfils, Tasuku Harada	2024	jRCT2080225090	Japan	Endometriosis	High-income	Fuji Pharma Co., Ltd	88	Multicenter randomized open-label active-controlled parallel-group RCT	18 clinical sites across Japan	Open-label (no participant or provider blinding)	E4 15 mg/DRSP 3 mg cyclic regimen vs EE 20 μg/DRSP 3 mg extended regimen	Laboratory biochemical endpoints	Not reported	32	86.5
322	The modulating effects of Resveratrol on the expression of MMP-2 and MMP-9 in endometriosis women: a randomized exploratory trial	Mahshad Kodarahmian, Fardin Amidi, Ashraf Moini, Ladan Kashani, Maryam Shabani Nashtaei, Azar Pazhohan, Mojdeh Bahramrezai, Samaneh Berenjian, Aligholi Sobhani	2019	Not reported	Iran	Endometriosis	Upper-middle-income	Research Deputy of Tehran University of Medical Sciences (Grant no. 940230-29327)	34	Randomized, placebo-controlled, double-blind exploratory clinical trial	Two centres (Arash & Shariati Hospitals, Tehran University)	Double-blind (participants and some investigators blinded)	Resveratrol 400 mg twice daily for 12–14 weeks + hospital routine protocol vs placebo	Biomarker (mRNA, protein, ELISA), inflammatory molecular outcomes	Not used	28	75.7
323	Disparate effects of pharmacotherapy on plasma PAI-1 levels in women with PCOS	Koiou E., Tziomalos K., Katsikis I., Delkos D., Tsourdi EA., Panidis D.	2013	None reported	Greece	PCOS	High-income	Not stated	50	Randomized controlled trial (sibutramine vs orlistat only)	Single academic endocrine gynecology unit	Not blinded (open-label)	Sibutramine 10 mg daily vs Orlistat 120 mg TID for 6 months (both with caloric-restricted diet + structured exercise)	Metabolic, endocrine, fibrinolysis marker (PAI-1)	No	23	62.2
324	Combination of a structured aerobic and resistance exercise improves glycaemic control in pregnant women diagnosed with gestational diabetes mellitus: A randomized controlled trial	Iva Sklempe Kokic, Marina Ivanisevic, Gianni Biolo, Bostjan Simunic, Tomislav Kokić, Rado Pisot	2018	NCT02196571	Croatia	GDM	High-income	No external funding; conducted using institutional resources	42	Randomized controlled trial	Two university hospitals (Zagreb)	Unblinded participants; physicians & lab staff blinded	Structured supervised aerobic + resistance exercise twice weekly + daily 30-min brisk walk vs standard GDM care	Clinical & biochemical	No	27	73
325	Triggering final oocyte maturation using different doses of human chorionic gonadotropin: a randomized pilot study in patients with polycystic ovary syndrome treated with gonadotropin-releasing hormone antagonists and recombinant follicle-stimulating horm	Kolibianakis EM; Papanikolaou EG; Tournaye H; Camus M; Van Steirteghem AC; Devroey P	2007	NR	Belgium	PCOS	High-income	Fund for Scientific Research, Flanders, Belgium.	80	Prospective, randomized, controlled pilot trial, three parallel arms.	Single tertiary university IVF center.	NR	hCG trigger dose: 10,000 IU vs 5,000 IU vs 2,500 IU, administered when ≥3 follicles ≥17 mm present. All patients received recombinant FSH stimulation and daily GnRH antagonist (ganirelix).	Reproductive outcomes (ongoing pregnancy, implantation), embryological outcomes (fertilization, MII oocytes), safety (OHSS).	NR	25	67.6
326	Cost-Effectiveness of Lifestyle Counselling as Primary Prevention of Gestational Diabetes Mellitus: Findings from a Cluster-Randomised Trial	Päivi Kolu, Jani Raitanen, Pekka Rissanen, Riitta Luoto	2013	ISRCTN33885819	Finland	GDM	High-income	Juho Vainio Foundation; Yrjö Jahnsson Foundation; Pirkanmaa Hospital District Competitive Research Funding (EVO/TAYS); National Institute for Health and Welfare, Finland	399	Cluster-randomised controlled trial	Primary care maternity clinics (14 clinics in Finland)	Open-label (unblinded)	Individualised lifestyle counselling (diet + PA + weight gain targets) vs routine antenatal care	Economic, clinical, patient-reported	Not reported	31	83.8
327	Anti-TNF-α treatment for deep endometriosis–associated pain: a randomized placebo-controlled trial	P.R. Koninckx, M. Craessaerts, D. Timmerman, F. Cornillie, S. Kennedy	2008	NCT00604864; EUDRACT EU-0053/endometriosis	Belgium	Endometriosis	High-income	Investigator-initiated; supported by Centocor (drug & monitoring)	21	Randomized, double-blind, placebo-controlled trial	Tertiary referral university hospital	Double-blind: investigators, research nurses, participants blinded	Infliximab 5 mg/kg IV at weeks 0, 2, 6 vs placebo IV; all underwent surgery at week 12; 6-month follow-up	Clinical pain scores (BB scale), patient diaries, VAS, analgesic use; imaging (TVU nodule size); surgical outcomes	No	24	64.9
328	Peritoneal full-conditioning reduces postoperative adhesions and pain: a randomized controlled trial in deep endometriosis surgery	Philippe R. Koninckx, Roberta Corona, Dirk Timmerman, Jasper Verguts, Leila Adamyan	2013	NCT01344486	Belgium	Endometriosis	High-income	Leuven Quality Surgery Fund; equipment support from Nordic Pharma, Fisher & Paykel, eSaturnus	27	Randomized controlled trial	Single tertiary university hospital	Surgeons unblinded; pain assessors and second-look surgeon blinded	Full-conditioning (86% CO₂ + 10% N₂O + 4% O₂; cooling; humidification; heparinized lavage; dexamethasone) + adhesion barrier vs standard laparoscopy + barrier	Surgical (adhesions), clinical (pain, recovery), inflammatory (CRP), physiological (CO₂ resorption)	Not reported	29	78.4
329	Preliminary evidence that cinnamon improves menstrual cyclicity in women with polycystic ovary syndrome: a randomized controlled trial	Daniel H. Kort, Roger A. Lobo	2014	NCT01483118	USA	PCOS	High-income	Institutional funding; Endocrine Fellows Foundation; Integrity Nutraceuticals supplied study drug	45	Randomized controlled trial	Single academic center (Columbia University)	Double-blind (participants & investigators)	Cinnamon 1.5 g/day vs identical placebo for 6 months	Menstrual frequency; metabolic & hormonal	Not reported	26	70.3
330	A comparison study of a novel stimulation protocol and the conventional low dose step-up and step-down regimens in patients with polycystic ovary syndrome undergoing in vitro fertilization.	Koundouros SN	2008	NR	Cyprus	PCOS	High-income	Supported by IBSA Cyprus	225	Prospective randomized controlled trial, three parallel arms.	Single-centre private fertility clinic.	NR	Group A: Low-dose step-up FSH (75 IU/day initially, incremental increases). Group B: Step-down FSH (225 IU/day initially, then reduced). Group C: Sequential step-up/step-down regimen alternating 150 IU and 75 IU early, then tailored. Pituitary downregulation with triptorelin in all groups.	Reproductive outcomes (pregnancy, live birth, miscarriage), stimulation characteristics, embryological outcomes.	NR	27	73
331	Effectiveness of a Family-based Health Promotion Intervention for Women With Prior GDM: The Face-It RCT	Karoline Kragelund Nielsen et al.	2025	NCT03997773	Denmark	GDM	High-income	Danish public and research foundations (Steno Diabetes Centers + National Research Foundation)	277	Parallel, open-label RCT	Multi-centre (3 sites: Copenhagen, Aarhus, Odense)	No (open-label)	9-month family-based program (home visits + digital coaching via Liva app + cross-sector communication) vs usual care	Clinical / patient-reported (BMI, T2DM risk factors, QoL)	Not reported	34	91.9
332	Adhesion prevention after endometriosis surgery—results of a randomized, controlled clinical trial with second-look laparoscopy	Krämer B., Andress J., Neis F., Hoffmann S., Brucker S., Kommoss S., Höller A.	2021	DRKS00014720; secondary ID U1111-1213-4142	Germany	Endometriosis	High-income	PlantTec Medical GmbH; Open Access Funding by Projekt DEAL	50	Prospective randomized controlled trial	Single tertiary academic center (University Hospital Tübingen)	Single-blind (patients only); surgeon blinded until application stage	4DryField® PH powder forming gel vs saline irrigation only	Surgical/clinical (adhesion extent, severity, incidence)	Not reported	31	83.8
333	Effect of oral contraceptive containing ethinyl estradiol combined with drospirenone vs. desogestrel on clinical and biochemical parameters in patients with polycystic ovary syndrome	Alka Kriplani, Anurekha Janaki Periyasamy, Nutan Agarwal, Vidushi Kulshrestha, Anand Kumar, Ariachery Chinnama Ammini	2010	Not reported	India	PCOS	Lower-middle-income	Not reported	60	Randomized controlled trial	Single tertiary centre (AIIMS Delhi)	Not blinded (visible treatment)	EE 30 mcg + drospirenone 3 mg vs EE 30 mcg + desogestrel 150 mcg, both 21/7 regimens for 6 months	Clinical, metabolic, hormonal, ultrasound	Not reported	33	89.2
334	Probiotic Lactobacillus acidophilus JYLA-126 improves metabolic outcomes in polycystic ovary syndrome: a randomized controlled trial	Jiarong Kuang, Jie Luo, Xia He, Tao Yu, Yan Zhou, Xinfeng Zhang, Zhaoxia Liu, Tingtao Chen	2025	ChiCTR2300076223	China	PCOS	Upper-middle-income	National Natural Science Foundation of China; Jiangxi Provincial Natural Science Foundation; National Key R&D Program; institutional funds	100	Parallel-group RCT	Single centre (Second Affiliated Hospital, Nanchang University)	Double-blind for probiotic/placebo; outcome assessors blinded	Metformin 500 mg BID + probiotic vs metformin 500 mg BID + placebo (12 weeks)	Metabolic, hormonal, reproductive, microbiome	No	29	78.4
335	Follicular homocysteine as a marker of oocyte quality in PCOS and the role of micronutrients	Tansu Kucuk, Pınar Erol Horozal, Asena Karakulak, Emel Timucin, Maurizio Dattilo	2023	ISRCTN55983518	Turkey	PCOS	Upper-middle-income	Partogen İlaç (Turkey) – laboratory analysis costs; Parthenogen SAGL (Switzerland) – product developer	48	Parallel, open-label randomized controlled trial	Single-centre (Acibadem Fulya Hospital IVF Center, Istanbul)	Open-label (participants unblinded; assessors blinded)	Micronutrient supplement (Impryl®, Parthenogen, Switzerland): betaine 200 mg, l-cystine 200 mg, zinc 10 mg, niacin 16 mg, B2 1.4 mg, B6 1.4 mg, 5-MTHF 400 μg, methylcobalamin 2.5 μg daily for ≥2 months before stimulation to oocyte pickup	Clinical, biochemical, embryological	Not reported	28	75.7
336	Efficacy of myoinositol in treatment of gestational diabetes mellitus in Asian Indian women: A pilot randomized clinical trial	Vidushi Kulshrestha, Shrey Balani, Garima Kachhawa, P. Vanamail, Rajesh Kumari, J.B. Sharma, Neerja Bhatla	2021	CTRI/2018/05/013937	India	GDM	Lower-middle-income	No funding declared	100	Randomized controlled trial (open-label)	Single-centre (AIIMS New Delhi antenatal clinic)	Open-label	Myoinositol 1 g twice daily + standard dietary modification vs diet alone	Glycaemic, maternal, neonatal	Not reported	30	81.1
337	Comparison of embryological and clinical outcome in GnRH antagonist vs. GnRH agonist protocols for in vitro fertilization in PCOS non-obese patients: a prospective randomized study	Rafal Kurzawa; Przemyslaw Ciepiela; Tomasz Baczkowski; Krzysztof Safranow; Pawel Brelik	2008	ACTRN12607000636459	Poland	PCOS	High-income	State Committee for Scientific Research (KBN 2 P05E 034 28)	70	Prospective randomized controlled trial	Single university hospital IVF center	Not blinded (patients, clinicians, embryologists)	GnRH antagonist (cetrorelix) protocol vs long GnRH agonist (triptorelin) protocol with rFSH and ICSI	Embryological, reproductive, safety	Not reported	26	70.3
338	Metformin induces a prompt decrease in LH-stimulated testosterone response in women with PCOS independent of its insulin-sensitizing effects	Dorothea Kurzthaler; Dijana Hadziomerovic-Pekic; Ludwig Wildt; Beata E. Seeber	2014	EudraCT 2006-001911-31	Austria	PCOS	High-income	No external funding; medication and placebo supplied by Kolassa & Merz GmbH	19	Randomized, double-blind, placebo-controlled trial with open-label extension	Single academic medical centre	Double-blind (participants and investigators)	Metformin 500 mg TID vs placebo for 2 days, followed by open-label metformin 12 weeks	Hormonal, metabolic	Not reported	31	83.8
339	Periodic mobile application (eMOM) with self-tracking of glucose and lifestyle improves treatment of diet-controlled gestational diabetes without human guidance: a randomized controlled trial	Mikko Kytö, Shinji Hotta, Sari Niinistö, Pekka Marttinen, Tuuli E. Korhonen, Lisa T. Markussen, Giulio Jacucci, Harri Sievänen, Henri Vähä-Ypyä, Ilkka Korhonen, Suvi Virtanen, Seppo Heinonen, Saila B. Koivusalo	2024	NCT04714762	Finland	GDM	High-income	Business Finland; Helsinki University Hospital; Aalto University; University of Helsinki; Fujitsu Finland	148	Parallel-group RCT	Single-country (Helsinki metropolitan area clinics)	Open-label; nurses masked until allocation	eMOM app + CGM + activity tracker + food diary (1 week/month) vs standard care	Maternal & neonatal clinical outcomes	No	33	89.2
340	The effects of metformin with lifestyle therapy in polycystic ovary syndrome: a randomized double-blind study	Ladson G., Dodson W.C., Sweet S.D., Archibong A.E., Kunselman A.R., Demers L.M., Williams N.I., Coney P., Legro R.S.	2011	NCT00151411	USA	PCOS	High-income	NIH Cooperative Reproductive Science Center grant; GCRC funding; no industry role	114	Randomized double-blind placebo-controlled trial	Two academic medical centers	Double-blind participants, investigators, assessors	Metformin (500 mg up-titrated to 2000 mg/day) + lifestyle vs placebo + lifestyle	Clinical, metabolic, hormonal, QOL	Not reported	33	89.2
341	Effects of metformin in adolescents with polycystic ovary syndrome undertaking lifestyle therapy: a pilot randomized double-blind study.	Ladson G; Dodson WC; Sweet SD; Archibong AE; Kunselman AR; Demers LM; Lee PA; Williams NI; Coney P; Legro RS	2011	ClinicalTrials.gov NCT00151411	United States (Tennessee, Pennsylvania, Virginia)	PCOS	High-income	not reported	22	Pilot, randomized, double-blind, placebo-controlled clinical trial (RCT)	Multicenter (Meharry Medical College & Penn State College of Medicine)	Double-blind (patients + investigators)	- Metformin, 500 mg capsules, stepped up to 4/day (as tolerated) - Identical placebo capsules - All participants received lifestyle therapy (diet + 150 min/week exercise)	Clinical, biochemical, anthropometric, metabolic, ultrasound, and patient-reported outcomes	not reported	31	83.8
342	A low glycemic index, energy-restricted diet but not Lactobacillus rhamnosus supplementation changes fecal short-chain fatty acid and serum lipid concentrations in women with overweight or obesity and polycystic ovary syndrome	K. Łagowska, S. Drzymała-Czyż	2022	NCT03902301	Poland	PCOS	High-income	Not stated	40	Parallel-group RCT	University hospital outpatient clinic	Not blinded (dietary + probiotic intervention)	20-week low-GI, energy-restricted diet vs same + Lactobacillus rhamnosus 12×10⁹ CFU/day	Biological (SCFA, bacteria), clinical biochemical (lipids), anthropometric	Not used	27	73
343	Standardised versus individualised multiherb Chinese herbal medicine for oligomenorrhoea and amenorrhoea in polycystic ovary syndrome: a randomised feasibility and pilot study in the UK	Lily Lai, Andrew Flower, Philip Prescott, Trevor Wing, Michael Moore, George Lewith	2017	ISRCTN31072075	UK	PCOS	High-income	NIHR School for Primary Care (PhD fellowship)	40	Randomised feasibility and pilot RCT	Two private CHM practices	Practitioner and assessor blinded; participants blinded to treatment differences	Standardised CHM (14-herb formula) vs individualised CHM; 16 g/day for 6 months	Clinical (menstrual rate, hirsutism, BMI, QoL), safety	None	29	78.4
344	Effect of continuous glucose monitoring compared with self-monitoring of blood glucose in gestational diabetes patients with HbA1c <6%: a randomized controlled trial	Mengyu Lai, Jianrong Weng, Jiaying Yang, Yujia Gong, Fang Fang, Na Li, Mei Kang, Xianming Xu, Yufan Wang	2023	NCT03955107	China	GDM	Upper-middle-income	National Natural Science Foundation of China; Shanghai Science & Technology Commission Foundation; SHDC Clinical Research Plan	154	Parallel-group RCT	Single centre (Shanghai General Hospital)	Open-label (participants and clinicians aware)	CGM every 4 weeks ×3 vs SMBG only; both with diabetes education and treatment adjustment	Glycemic metrics, anthropometry, metabolic biomarkers, pregnancy outcomes	Not used	30	81.1
345	Initiation of GnRH antagonist on Day 1 of stimulation compared to long agonist protocol in PCOS patients: effect on hormonal levels and follicular development	Trifon G. Lainas, George K. Petsas, Ioannis Z. Zorzovilis, George S. Iliadis, George T. Lainas, Haris E. Cazlaris, Efstratios M. Kolibianakis	2007	None reported	Greece	PCOS	High-income	None stated	78	Parallel RCT (1:2 allocation)	Single IVF unit	Unblinded (patients and physicians)	Day-1 GnRH antagonist + rFSH vs long GnRH agonist downregulation + rFSH	Endocrine (E2, LH, progesterone), clinical (follicular growth, OHSS), reproductive (pregnancy)	None reported	26	70.3
346	Flexible GnRH antagonist protocol vs GnRH agonist long protocol in patients with PCOS treated for IVF: a prospective RCT	Trifon G. Lainas, Ioannis A. Sfontouris, Ioannis Z. Zorzovilis, George K. Petsas, George T. Lainas, Efthymia Alexopoulou, Efstratios M. Kolibianakis	2010	NCT00417144	Greece	PCOS	High-income	Not reported	220	Single-centre randomized controlled trial	IVF clinic (Eugonia-Iatriki Erevna IVF Center, Athens)	None (open-label); clinicians & patients unblinded; lab staff blinded for assays only	Flexible GnRH antagonist protocol vs GnRH agonist long protocol during IVF stimulation	Clinical reproductive (ongoing pregnancy); safety (OHSS); embryological	Not reported	28	75.7
347	The reproductive and metabolic effect of rosiglitazone on Chinese women with polycystic ovarian syndrome--a double-blind randomized placebo-controlled study.	Lam PM; Tam WH; Ma RC; Cheung LP; Tsui MH; Tong PC; Chow FC; Lam CW; Chan MH; Chan JC; Haines CJ	2011	Chinese Clinical Trial Registry ChiCTR-TRC-09000670	China	PCOS	Upper-middle-income	Lee Hysan Foundation Research Grant; CUHK & RGC Direct Allocation Grant (Project 2041092). Drug supplied by GSK but with no role in design, analysis, or reporting.	70	Randomized, double-blind, placebo-controlled, parallel-group trial	Single tertiary referral centre.	Double-blind (participants and investigators).	Rosiglitazone: 4 mg daily for 1 month, then 4 mg twice daily for 11 months. Control: identical placebo, same schedule.	Reproductive (menstrual cyclicity, hirsutism, acne, testosterone); metabolic (glucose, insulin, lipids, HOMA-IR).	NR	25	67.6
348	Effectiveness of system-based intervention in reducing incidence of type 2 diabetes and improving postnatal metabolic profiles in women with GDM	Kai Wei Lee; Siow Foon Tan; Azahadi Omar; Nazrila Hairizan Nasir; Siew Mooi Ching; Mohd Khairi Mohd Noor; Noor Azreen Masdor; Yeow Siong Lee; Salmah Noordin; Hazlin Mohamed	2022	NMRR-15-2000-28718	Malaysia	GDM	Upper-middle-income	National Institute of Health Malaysia (BP005000)	650	Cluster randomized controlled trial	17 primary care clinics	Unblinded	System-based intervention: antenatal education + booklet + postpartum booster sessions + HCW training vs standard group counselling	T2DM incidence; metabolic indicators	Not reported	31	83.8
349	Letrozole versus clomiphene for infertility in the polycystic ovary syndrome.	Legro RS; Brzyski RG; Diamond MP; Coutifaris C; Schlaff WD; Casson P; Christman GM; Huang H; Yan Q; Alvero R; Haisenleder DJ; Barnhart KT; Bates GW; Usadi R; Lucidi S; Baker V; Trussell JC; Krawetz SA; Snyder P; Ohl D; Santoro N; Eisenberg E; Zhang H	2014	gov NCT00719186	USA	PCOS	High-income	NICHD (various grants listed) and NIH translational science grants	750	Multicenter, double-blind, randomized controlled trial (RCT)	Single centre-Academic medical centers in the U.S.	Double-blind (participants, investigators, outcome assessors)	Letrozole 2.5–7.5 mg daily for 5 days vs Clomiphene 50–150 mg daily for 5 days, up to 5 cycles	Clinical (live birth, ovulation, pregnancy, congenital anomalies, adverse events)	not mentioned	34	91.9
350	Letrozole versus Clomiphene for Infertility in the Polycystic Ovary Syndrome	Richard S. Legro, Robert G. Brzyski, Michael P. Diamond, Christos Coutifaris, William D. Schlaff, Peter Casson, Gregory M. Christman, Hao Huang, Qingshang Yan, Ruben Alvero, Daniel J. Haisenleder, Kurt T. Barnhart, G. Wright Bates, Rebecca Usadi, Scott Lucidi, Valerie Baker, J.C. Trussell, Stephen A. Krawetz, Peter Snyder, Dana Ohl, Nanette Santoro, Esther Eisenberg, Heping Zhang	2014	NCT00719186	USA	PCOS	High-income	NICHD; NIH; multiple center grants	750	Double-blind RCT	11 academic reproductive medicine centers	Double-blind (participants & investigators); identical capsules	Letrozole 2.5–7.5 mg vs Clomiphene 50–150 mg for up to 5 cycles	Reproductive clinical outcomes	No	35	94.6
351	Randomized Controlled Trial of Preconception Interventions in Infertile Women With Polycystic Ovary Syndrome	Richard S. Legro, William C. Dodson, Penny M. Kris-Etherton, Allen R. Kunselman, Christy M. Stetter, Nancy I. Williams, Carol L. Gnatuk, Stephanie J. Estes, Jennifer Fleming, Kelly C. Allison, David B. Sarwer, Christos Coutifaris, Anuja Dokras	2015	NCT00704912	USA	PCOS	High-income	NIH (NICHD, NCRR, NCATS)	149	Parallel-group RCT	Two academic medical centers	Open-label; lab staff blinded	1) Continuous OCP (20 µg EE + 1 mg norethindrone) 2) Lifestyle (diet, exercise, sibutramine/orlistat) 3) Combined	Clinical (ovulation, live birth), metabolic, anthropometric, patient-reported (HRQOL)	No	36	97.3
352	Effects of Vitamin D Supplementation on Surrogate Markers of Fertility in PCOS Women: A Randomized Controlled Trial.	Lerchbaum E; Theiler-Schwetz V; Kollmann M; WÃ¶lfler M; Pilz S; Obermayer-Pietsch B; Trummer C	2021	not mentioned	Australia	PCOS	High-income	Austrian Science Fund (FWF), Project No. KLI 274	330	Randomised placebo-controlled clinical trial	single centre	Appears double-blind (not explicitly stated in this section)	Vitamin D supplementation (dose not stated in discussion text) vs placebo for 24 weeks.	Endocrine (FSH, LH, LH/FSH ratio, estradiol, AMH, androstenedione, DHEAS) • Metabolic • Vitamin D status	Not reported	32	86.5
353	Comparing the individual effects of metformin and rosiglitazone and their combination in obese women with polycystic ovary syndrome: a randomized controlled trial	Li Y., Tan J., Wang Q., Duan C., Hu Y., Huang W.	2020	ChiCTR-TRC-13003642	China	PCOS	Upper-middle-income	Not reported (no conflicts disclosed)	204	Randomized controlled trial (open-label)	Single tertiary teaching hospital	None (open-label)	Group1: Metformin 1500 mg/day; Group2: Rosiglitazone 4 mg/day; Group3: Metformin 1000 mg/day + Rosiglitazone 4 mg/day for 6 months; all with lifestyle modification	Clinical (menstrual patterns, androgen features), metabolic (insulin resistance, lipid profile), anthropometric	No	33	89.2
354	Within-trial cost-effectiveness of lifestyle intervention using a 3-tier shared care approach for pregnancy outcomes in Chinese women with gestational diabetes	Weiqin Li; Cuiping Zhang; Junhong Leng; Ping Shao; Huiguang Tian; Fuxia Zhang; Ling Dong; Zhijie Yu; Juliana Chan; Gang Hu; Ping Zhang; Xilin Yang	2020	NCT01565564	China	GDM	Upper-middle-income	National Key R&D Program of China; BRIDGES (IDF + Lilly Diabetes)	700	RCT-based economic evaluation	Multilevel (primary, secondary, tertiary hospitals)	Unblinded	Shared-care structured lifestyle program (diet + PA + SMBG + counselling) vs 1-session usual care	Maternal & neonatal outcomes; cost outcomes	No	23	62.2
355	The Impact of Lifestyle Intervention on Dietary Quality among Rural Women with Previous Gestational Diabetes Mellitus—A Randomized Controlled Study	Mingshu Li, Qian Lin, Jingcheng Shi, Yue Xi, Caihong Xiang, Cuiting Yong, Jia Guo	2021	Not specified	China	GDM	Upper-middle-income	China Medical Board (Grant 16-256); Innovation-Driven Project of Central South University (2018CX037)	404	Cluster-randomised controlled trial	Multicentre (two rural counties: Youxian and Yongding)	Single-blind (assessors blinded; participants unblinded)	6-month lifestyle program: 6 group seminars + 8 phone consultations (diet, PA, stress, family support); based on Theory of Planned Behavior	Clinical and behavioural	Not reported	31	83.8
356	Therapeutic effects of puerarin on polycystic ovary syndrome: a randomized trial in Chinese women	Wenjing Li, Hongbo Hu, Guofang Zou, Zhanzhong Ma, Jing Liu, Fanxiang Li	2021	ChiCTR190002220	China	PCOS	Upper-middle-income	Guangdong provincial science programs; TCM bureau projects	70	Randomized controlled trial (parallel)	Single center (Yuebei People’s Hospital, Guangdong)	Open-label	Standard therapy: Diane-35 + metformin (1.5 g/day). Treatment groups additionally received puerarin 150 mg/day × 3 months.	Hormonal, metabolic, antioxidant	Not reported	27	73
357	Assessment of two formulations of triptorelin in Chinese patients with endometriosis: a phase 3 randomized controlled trial	Xiaoyan Li, Huaifang Li, Hong Shi, Xiaomao Li, Renfeng Zhou, Dan Lu, Yunlang Cai, Yingfang Zhou, Patrick Cabri, Xiaofeng Shi, Anna Pedret-Dunn, Jinhua Leng	2022	NCT03232281	China	Endometriosis	Upper-middle-income	Ipsen	300	Phase 3 RCT (open-label, active-controlled, parallel-group)	24 hospital centers in China	Open-label (due to different injection frequency)	Triptorelin pamoate PR 3-month (15 mg IM q12 weeks ×2 doses) vs Triptorelin acetate PR 1-month (3.75 mg IM q4 weeks ×6 doses)	Clinical (E2 suppression, pelvic pain), biochemical (LH/FSH/E2), PK/PD, time to menses	Not reported	35	94.6
358	Efficacy of acupuncture for endometriosis-associated pain: a multicenter randomized single-blind placebo-controlled trial.	Li PS; Peng XM; Niu XX; Xu L; Hung Yu Ng E; Wang CC; Dai JF; Lu J; Liang RN	2023	NCT03125304	China	Endometriosis	Upper-middle-income	National Administration of TCM (jdzy2015065); Jiangxi Clinical Research Centre for Obstetrics and Gynecology Diseases of TCM (20181BCG42003); Liang Ruining's National Famous and Old Experts Inheritance Studio of TCM ([2022]75); Research Grant Council Collaborative Research Fund (C4072-22G); Jiangxi University of Chinese Medicine Science and Technology Innovation Team Development Program (CXTD2201…	106	Multicenter, randomized, single-blind, placebo-controlled	4 tertiary hospitals in Jiangxi and Hainan provinces	Participants and data collectors blinded; acupuncturists not blinded	Acupuncture (specific points: CV4, SP6, LR3, KI6, ST30) vs. sham acupuncture (non-acupoints, superficial insertion)	Pain (VAS for dysmenorrhea, nonmenstrual pelvic pain, dyspareunia); duration of pain; emotional and physical function (MPI, BDI, POMS); quality of life (EHP); CA-125; patient satisfaction	not reported	34	91.9
359	Human menopausal gonadotropin (HMG) combined with different doses of letrozole for treating anovulatory infertility in PCOS: randomized controlled trial	Jingyi Li, Yuan Peng, Xin Dai, Ling Zhang, Xuefeng Long, Xiuping Wang, Weiwei Li, Yuqing Fang, Wenqian Xiong, Yi Liu	2025	Not listed (no registry reported in article)	China	PCOS	Upper-middle-income	Natural Science Foundation of Hubei Province (2023AFB506)	174	Randomized controlled trial (parallel)	Single tertiary centre (Wuhan Union Hospital)	Open-label for clinicians/patients; sonographers/statisticians blinded	LE 2.5 mg or 5 mg (cycle days 3–7) + HMG 75 IU/day until mature follicle	Clinical reproductive outcomes	Not used	32	86.5
360	The effects of music therapy on pain and anxiety in young nulliparous patients undergoing laparoscopic cystectomy for endometriosis: a randomized controlled trial	Wenwei Li, Huiyan Feng, Xiaohui Yang, Yue Meng, Yuebo Yang, Qingjian Ye	2025	Not registered	China	Endometriosis	Upper-middle-income	No external funding (authors report “None”)	150	Randomized controlled trial (single-blind)	Single tertiary teaching hospital (Third Affiliated Hospital of Sun Yat-sen University)	Single-blind (data analysts blinded only)	Music therapy daily × 30 min from 1 day pre-op to 7 days post-op vs standard care	Pain & anxiety	Not reported	28	75.7
361	Does ovarian suspension following laparoscopic surgery for endometriosis reduce postoperative adhesions? An RCT	Wee Liak Hoo, Andreas Stavroulis, Kate Pateman, Ertan Saridogan, Alfred Cutner, George Pandis, Edward N.C. Tong, Davor Jurkovic	2014	ISRCTN24242218	United Kingdom	Endometriosis	High-income	Research fund from the Gynaecology Ultrasound Centre, London; some honoraria/consultancies disclosed	55	Double-blind randomized within-patient controlled RCT	Tertiary Endometriosis Centre (University College London Hospital)	Double-blind: patients and ultrasound assessors blinded; surgeons could not disclose allocation	At end of surgery: one ovary suspended for 36–48 h vs contralateral ovary not suspended (placebo sham suture)	Surgical (adhesion prevalence, severity) & clinical (pain, symptoms)	Not reported	33	89.2
362	Kuntai capsules improve glucolipid metabolism in patients with polycystic ovary syndrome: A randomized, double-blind, placebo-controlled trial	Ruining Liang; Zhen Liu; Peishuang Li; Pei Fan; Ling Xu; Xueyan Sun; Jiahua Peng; Xuemei Peng; Meinan Zhang	2019	Not reported	China	PCOS	Upper-middle-income	National Natural Science Foundation of China (81560783); Jiangxi Province Science & Technology Plan (20141BBG70056)	100	Randomized double-blind placebo-controlled trial	Two affiliated university hospitals	Double-blind (participants and investigators)	Heyan Kuntai Capsule 4 capsules TID vs placebo for 6 months (both groups received lifestyle education)	Metabolic, hormonal, safety	Not reported	30	81.1
363	Effects and plasma proteomic analysis of GLP-1RA versus CPA/EE, in combination with metformin, on overweight PCOS women: a randomized controlled trial.	Liao M; Li X; Zhang H; Zhou L; Shi L; Li W; Shen R; Peng G; Zhao H; Shao J; Wang X; Sun Z; Zheng H; Long M	2024	ACTRN12621000153819	Australia	PCOS	High-income	Australian Government Medical Research Future Fund (APP1200392)	35	Single-blinded, randomized, controlled crossover feeding trial	Monash University, Melbourne	Participants and statistician blinded; researchers not blinded	Low FODMAP diet (<5 g/day) vs control diet (~20 g/day FODMAPs); both nutritionally matched and supplied	GI symptoms (VAS-IBS), stool form (Bristol Stool Chart), QOL (GIQLI, EHPQ), psychological symptoms (DASS-21)	not specified	24	64.9
364	A Smartphone App to Restore Optimal Weight (SPAROW) in Women With Recent Gestational Diabetes Mellitus: Randomized Controlled Trial	Karen Lim, Shiao-Yng Chan, Su Lin Lim, Bee Choo Tai, Cammy Tsai, Su Ren Wong, Siew Min Ang, Tong Wei Yew, E. Shyong Tai, Eu Leong Yong	2021	ClinicalTrials.gov NCT03324737	Singapore	GDM	High-income	National Medical Research Council (Health Services Research Grant, Singapore)	200	Parallel, open-label randomized controlled trial	Single-centre (National University Hospital, Singapore)	Open-label (participants and assessors unblinded)	SPAROW (nBuddy app) for logging meals, steps, and weight with live coaching vs standard postpartum care	Clinical, behavioral, biochemical	Not specified	29	78.4
365	Lifestyle intervention to prevent gestational diabetes mellitus and adverse maternal outcomes among pregnant women at high risk for gestational diabetes mellitus	Xueyan Lin, Ting Yang, Xueqin Zhang, Wei Wei	2020	Not registered	China	GDM	Upper-middle-income	None reported	281	Parallel RCT	Single-centre (Women & Children’s Hospital, Xiamen University)	Not blinded	Structured lifestyle intervention: diet modification, daily moderate exercise, weight control + twice-weekly WeChat education vs usual prenatal care	Clinical	Not used	26	70.3
366	Effect of sibutramine on weight reduction in women with polycystic ovary syndrome: a randomized, double-blind, placebo-controlled trial	Asa Lindholm, Marie Bixo, Inger Björn, Pål Wolner-Hanssen, Mats Eliasson, Anders Larsson, Owe Johnson, Inger Sundström Poromaa	2008	Not registered	Sweden	PCOS	High-income	Family Planning Foundation; Uppsala University Hospital Development Fund; Visare Norr; Abbott Scandinavia (unrestricted small grant; no involvement)	42	Randomized, double-blind, placebo-controlled, multicenter parallel-group trial	Multicenter (primary care + referral centers + private practices)	Double-blind (participants & investigators)	Sibutramine 15 mg daily + lifestyle modification vs placebo + lifestyle modification for 24 weeks	Clinical (weight, menses), anthropometric, metabolic, hormonal	Not used	27	73
367	Impact of probiotics in women with gestational diabetes mellitus on metabolic health: a randomized controlled trial	Karen L. Lindsay, Lorraine Brennan, Maria A. Kennelly, Orla C. Maguire, Thomas Smith, Sinead Curran, Mary Coffey, Michael E. Foley, Mensud Hatunic, Fergus Shanahan, Fionnuala M. McAuliffe	2015	ISRCTN97241163 Part B	Ireland	GDM	High-income	National Maternity Hospital Medical Fund; Ivo Drury Award; EU FP7 grant 289346	149	Double-blind RCT	Single tertiary maternity hospital	Double-blind (participants, clinicians, lab staff)	Lactobacillus salivarius UCC118 capsule daily vs placebo	Maternal metabolic + pregnancy + neonatal	Not reported	25	67.6
368	Comparison of clomiphene citrate and letrozole for ovulation induction in women with polycystic ovary syndrome: a prospective randomized trial	Chang Liu, Guimei Feng, Wei Huang, Qiuyi Wang, Shiyuan Yang, Jing Tan, Jing Fu, Dong Liu	2017	ChiCTR-TRC-11001821	China	PCOS	Upper-middle-income	Not reported	268	Prospective randomized controlled trial (4-arm parallel)	Single tertiary hospital (West China Second University Hospital)	No blinding of participants or clinicians reported	Four arms: (1) CC; (2) CC + metformin; (3) LE; (4) LE + metformin; CC 50–150 mg x 5 days; LE 5 mg x 5 days; MET 1000–1500 mg/day	Clinical and reproductive outcomes (ovulation, pregnancy, live birth, abortion); metabolic parameters	Not reported	31	83.8
369	One-year weight losses in the Tianjin Gestational Diabetes Mellitus Prevention Program: A Randomized Clinical Trial	Liu H; Wang L; Zhang S; Leng J; Li N; Li W; Wang J; Tian H; Qi L; Yang X; Yu Z; Tuomilehto J; Hu G	2018	NCT01554358	China	GDM	Upper-middle-income	EFSD/Chinese Diabetes Society/Lilly; Tianjin Health Center; NIH (R01DK100790, U54GM104940)	1180	Randomized controlled trial	Multi-district urban health centers	Single-blind (blinded assessors & analysts)	4-year lifestyle intervention vs usual care	Anthropometric and behavioural outcomes	No	29	78.4
370	Lifestyle Intervention for Overweight/Obese Pregnant Women with Polycystic Ovarian Syndrome: Lessons and Challenges.	Liu C; Zhang L; Zheng W; Liang X; Tian Z; Li G	2021	ClinicalTrials.gov NCT04216485	China	PCOS	Upper-middle-income	National Key Research and Development Program of China (2016YFC1000304), Beijing Hospitals Authority’ Ascent Plan (DFL20191402), Beijing Natural Science Foundation (S160001), Beijing Municipal Science & Technology Commission (Z161100000516160)	296	Randomized Controlled Trial (RCT)	Single-centre (Beijing Obstetrics and Gynecology Hospital, Capital Medical University)	not reported	Lifestyle intervention including controlled diet and exercise; follow-up supported via WeChat app; face-to-face visits optional	Maternal (GWG, GDM, PIH, lipid/insulin profiles) and neonatal (birth weight, preterm delivery, C-section, macrosomia, LBWI)	not reported	27	73
371	Metabolic health during a randomized controlled lifestyle intervention in women with PCOS.	Dietz de Loos A; Jiskoot G; Beerthuizen A; Busschbach J; Laven J	2021	Dutch Trial Register NTR2450	Netherland	PCOS	High-income	Not funded	183	Randomized controlled trial (three-arm parallel design)	Single centre (tertiary university hospital – Erasmus MC, Rotterdam)	Open-label	Three-component LSI (20 × 2.5 h group sessions over 12 months: cognitive behavioural therapy, diet based on Dutch Food Guide, and exercise per WHO recommendations); half received SMS support (SMS+) from month 3	Care as usual (CAU) – brief advice to adopt a healthy lifestyle/lose weight independently	Baseline and every 3 months up to 12 months (0, 3, 6, 9, 12 mo)	34	91.9
372	A randomized controlled trial investigating the effects of a low–glycemic index diet on pregnancy outcomes in gestational diabetes mellitus	Jimmy Chun Yu Louie, Tania P. Markovic, Nimalie Perera, Deborah Foote, Peter Petocz, Glynis P. Ross, Jennie C. Brand-Miller	2011	ACTRN12608000218392	Australia	GDM	High-income	Australian National Health and Medical Research Council (Project Grant ID632889)	99	Parallel, two-arm randomized controlled trial	Single-centre (Royal Prince Alfred Hospital, Sydney)	Participants and investigators blinded except study dietitian	LGI diet (target GI ≤50) vs high-fiber, moderate-GI diet (target GI ≈60), both with similar macronutrient composition	Clinical, biochemical	Not reported	28	75.7
373	A randomized study comparing triptorelin or expectant management following conservative laparoscopic surgery for symptomatic stage III–IV endometriosis	Giuseppe Loverro, Carmine Carriero, A. Cristina Rossi, Giuseppe Putignano, Vittorio Nicolardi, Luigi Selvaggi	2008	Not reported	Italy	Endometriosis	High-income	Not reported	60	Randomised controlled trial	Single-centre (University of Bari)	Participants blinded (placebo saline injections), clinicians not blinded	Triptorelin 3.75 mg IM every 28 days × 3 months vs placebo saline injections	Pain, recurrence, fertility outcomes	Not reported	30	81.1
374	Effects of vitamin C on the outcome of in vitro fertilization–embryo transfer in endometriosis: A randomized controlled study	Xiang Lu; Zhengmu Wu; Min Wang; Weiwei Cheng	2018	Not reported	China	Endometriosis	Upper-middle-income	Leading Project of Science and Technology Commission of Shanghai Municipality (Grant No. 134119a8000)	280	Randomized controlled trial (parallel)	Single tertiary reproductive medicine centre	Open-label	Oral vitamin C 1000 mg/day for 2 months before IVF-ET until 2 weeks post-transfer vs no treatment	Reproductive, biochemical	Not reported	26	70.3
375	Pregnancy outcome and cost-effectiveness comparisons of artificial cycle-prepared frozen embryo transfer with or without GnRH agonist pretreatment for polycystic ovary syndrome: a randomized controlled trial	L. Luo; M. Chen; Y. Wen; L. Zhang; C. Zhou; Q. Wang	2020	ChiCTR-IOR-17010729	China	PCOS	Upper-middle-income	National Key R&D Program (2016YFC1000205); National Natural Science Foundation of China (81701403 & 81871159)	343	Parallel 1:1 open-label RCT	Single university-affiliated reproductive centre	Open-label; outcome verification via ultrasound + follow-up	GnRH-agonist pretreatment (Triptorelin 1 mg) + AC-FET vs AC-FET alone	Clinical (pregnancy outcomes) & cost-effectiveness	Not reported	31	83.8
376	Primary Prevention of Gestational Diabetes Mellitus and Large-for-Gestational-Age Newborns by Lifestyle Counseling	Riitta Luoto, Tarja I. Kinnunen, Minna Aittasalo, Päivi Kolu, Jani Raitanen, Katriina Ojala, Kirsi Mansikkamäki, Satu Lamberg, Tommi Vasankari, Tanja Komulainen, Sirkku Tulokas	2011	ISRCTN33885819	Finland	GDM	High-income	Finnish Diabetes Research Fund; Pirkanmaa Hospital District; Academy of Finland; Finnish Ministries of Education & Social Affairs/Health	399	Cluster-randomised controlled trial	Multi-centre (14 municipalities)	None (open-label); outcome assessors not explicitly blinded	Lifestyle counselling: PA counselling at 8–12 weeks + diet counselling at 16–18 weeks + reinforcement at 7 visits; weight-gain monitoring; written workbook; group sessions	Clinical, behavioural, neonatal	Not used	35	94.6
377	Effects of metformin versus ethinyl-estradiol plus cyproterone acetate on ambulatory blood pressure monitoring and carotid intima media thickness in women with the polycystic ovary syndrome	Manuel Luque-Ramírez, Covadonga Mendieta-Azcona, Francisco Alvarez-Blasco, Héctor F. Escobar-Morreale	2009	ClinicalTrials.gov NCT00428311	Spain	PCOS	High-income	Spanish Ministry of Health & Consumer Affairs (Instituto de Investigación Carlos III); Hospital Ramón y Cajal	34	Randomized clinical trial (open-label)	Academic hospital (endocrinology & vascular surgery units)	Open-label	Metformin 850 mg twice daily vs ethinyl-estradiol 35 µg + cyproterone acetate 2 mg (Diane-35 Diario) for 24 weeks	Cardiovascular surrogate outcomes (ABPM, CIMT)	Not used	29	78.4
378	A Single Session of a Digital Health Tool-Delivered Exercise Intervention May Provide Immediate Relief from Pelvic Pain in Women with Endometriosis: A Pilot Randomized Controlled Study	Muhammad Lutfi, Lance C. Dalleck, Claire Drummond, Murray Drummond, Liana Paparella, Caitlin E. Keith, Michael Kirton, Laura Falconer, Lemlem Gebremichael, Caroline Phelan, Christine Barry, Kiara Roscio, Belinda Lange, Joyce S. Ramos	2023	Not reported	Australia	Endometriosis	High-income	Caring Futures Institute, Flinders University	22	Pilot 3-arm RCT	Single academic research center (Flinders University)	No blinding (exercise modality obvious)	(1) 1-hr supervised telehealth exercise; (2) 1-hr unsupervised VR-delivered exercise; (3) control (ADLs)	Clinical (pelvic pain VAS)	Not used	23	62.2
379	Intensive low-glycaemic-load dietary intervention for the management of glycaemia and serum lipids among women with gestational diabetes: a randomized control trial	Wen-Jun Ma, Zhi-Hong Huang, Bi-Xia Huang, Ben-Hua Qi, Yan-Jun Zhang, Ben-Xi Xiao, Yuan-Hong Li, Li Chen, Hui-Lian Zhu	2014	Not reported	China	GDM	Upper-middle-income	Science and Technology Program of Guangdong Province, China (Grant 2006B36005013)	95	Parallel RCT	Single maternal primary care clinic	Not blinded (dietary intervention behavioural); lab staff blinded	Low-GL individualized diet vs standard individualized diet from 24–26 wks to delivery	Clinical (glycaemia, lipids, pregnancy outcomes)	None reported	28	75.7
380	Short-term combined treatment with exenatide and metformin for overweight/obese women with polycystic ovary syndrome.	Ma RL; Deng Y; Wang YF; Zhu SY; Ding XS; Sun AJ	2021	NCT04029272 (ClinicalTrials.gov)	China	PCOS	Upper-middle-income	NR	50	Open-label parallel-group randomized controlled clinical trial	Single centre	None – open-label study.	COM group: Metformin 500 mg TID + exenatide QW 2 mg. MET group: Metformin 500 mg TID only. Both groups also received Diane-35 (ethinylestradiol + cyproterone acetate) for cycle control. Duration: 12 weeks.	Anthropometric (weight, BMI, waist/hip circumference); Metabolic (FPG, OGTT glucose & insulin, HOMA-IR, QUICKI, Matsuda index); Hormonal (total testosterone, DHEAS); Lipids (TC, TG, HDL-c, LDL-c); Inflammatory (hsCRP).	NR	29	78.4
381	Comparing the efficacy of a mobile phone–based blood glucose management system with standard clinic care in women with gestational diabetes: randomized controlled trial	Lucy Mackillop, Jane E. Hirst, Katy J. Bartlett, Jacqueline S. Birks, Lei Clifton, Andrew J. Farmer, Oliver Gibson, Yvonne Kenworthy, Jonathan C. Levy, Lise Loerup, Oliver Rivero-Arias, Wai-Kit Ming, Carmelo Velardo, Lionel Tarassenko	2018	NCT01916694	United Kingdom	GDM	High-income	NIHR Oxford Biomedical Research Centre (UK government research funding)	206	Individually randomized controlled trial	Single large tertiary referral centre (Oxford University Hospitals)	Open-label for participants & clinicians; labor ward & neonatal staff blinded	GDm-health smartphone app with real-time clinician feedback vs standard paper diary and routine clinic visits	Clinical, biochemical, patient-reported, and health economic	No	34	91.9
382	A randomized controlled trial of a shared decision making intervention for diabetes prevention for women with a history of gestational diabetes mellitus: The Gestational diabetes Risk Attenuation for New Diabetes (GRAND study).	Madievsky R; Vu A; Cheng F; Chon J; Turk N; Krueger A; Krong J; Maranon R; Liu S; Han CS; Norris KC; Mangione C; Page J; Thomas S; Duru OK; Moin T	2023	gov NCT03766256	USA	GDM	High-income	National Institute of Diabetes and Digestive and Kidney Diseases (NIDDK)	310	Pragmatic RCT, multicenter	Two healthcare systems (UCLA & Intermountain)	Participants not blinded; investigators and outcome assessors blinded.	Shared decision making (SDM) visit using decision aid, clinician support, guidance for DPP or metformin initiation, follow-up navigation.	Continuous (weight), categorical (uptake of interventions)	not mentioned	32	86.5
383	Follicular fluid and supernatant from cultured cumulus–granulosa cells improve in vitro maturation in patients with polycystic ovarian syndrome	Aicha Madkour, Nouzha Bouamoud, Ismail Kaarouch, Noureddine Louanjli, Brahim Saadani, Said Assou, Smahane Aboulmaouahib, Omar Sefrioui, Saaid Amzazi, Henri Copin, Moncef Benkhalifa	2018	Not reported	Morocco (with donor CGC/HFF from France)	PCOS	Upper-middle-income	None declared	47	Randomized controlled trial	University-affiliated private IVF centers	No blinding	Four IVM interventions: 1) S-IVM (medium only), 2) AFF-IVM (autologous FF 10%), 3) HFF-IVM (heterologous FF 10%), 4) HFF/CGC-IVM (heterologous FF + supernatant from cultured CGC)	Embryologic outcomes (maturation %, fertilization %, cleavage %, blastocyst quality)	No	24	64.9
384	Impact of metformin on anti-MÃ¼llerian hormone in women with polycystic ovary syndrome: a secondary analysis of a randomized controlled trial.	Madsen HN; Lauszus FF; Trolle B; Ingerslev HJ; TÃ¸rring N	2015	NCT02280057	Denmark	PCOS	High-income	No specific funding reported	60	Randomized, double-blind, placebo-controlled cross-over trial	singel centre- Hospital (Department of Gynecology & Obstetrics, Holstebro and Aarhus University Hospital labs)	Double-blind (participants and investigators)	Metformin 1700 mg/day (850 mg twice daily) vs matched placebo; 6 months treatment, 3-month washout, then cross-over	Biochemical (AMH measured by Beckman-Coulter Gen II assay) and clinical/biochemical secondary outcomes	not reported	26	70.3
385	The adjuvant effect of metformin and N-acetylcysteine to clomiphene citrate in induction of ovulation in patients with Polycystic Ovary Syndrome	Ahmed M. Maged, Heba Elsawah, Aly Abdelhafez, Ahmed Bakry, Walaa Al Mostafa	2015	Not reported	Egypt	PCOS	Lower-middle-income	None stated; no conflicts reported	120	Randomized controlled clinical trial	Single academic infertility center (Kasr El Aini Hospital, Cairo University)	Open-label (no blinding reported)	CC only vs CC + NAC (1200 mg/day) vs CC + metformin (1500 mg/day)	Clinical (ovulation, pregnancy) & ultrasonographic (follicles, endometrium)	No	27	73
386	The possible short-term of Nigella sativa - L in the management of adolescent polycystic ovarian syndrome: results of a randomized controlled trial.	Mahmoudian A; Ashouri A; Bilandi RR; Mohammadzadeh F; Dashti S; Bahri N	2024	IRCT20221017056209N1	Iran	PCOS	Upper-middle-income	Gonabad University of Medical Sciences (Grant number 1195)	116	Randomised controlled clinical trial (parallel-group)	Multi-centre within Gonabad (private and public gynecology clinics)	Only statistical analyst blinded (single-blind)	Intervention: Nigella sativa extract 1000 mg daily × 16 weeks Control: Medroxyprogesterone 10 mg × 10 days/month from day 14, for 16 weeks	Continuous (hormones, ovarian volume, BMI, BP) Categorical (menstrual irregularities)	not reported	25	67.6
387	Flash glucose monitoring in gestational diabetes mellitus (FLAMINGO): a randomised controlled trial	Agata Majewska, Paweł Jan Stanirowski, Jacek Tatur, Barbara Wojda, Iwona Radosz, Mirosław Wielgoś, Dorota Agata Bomba-Opon	2023	ClinicalTrials.gov NCT04422821	Poland	GDM	High-income	None declared	100	Parallel randomised controlled trial	Single-centre (Medical University of Warsaw)	Open-label	Flash glucose monitoring (Freestyle Libre) vs SMBG (fingerstick meters)	Clinical (glycaemic control and perinatal outcomes)	Not reported	31	83.8
388	The effect of cognitive behavioral therapy on depression and anxiety in women with polycystic ovary syndrome: a randomized controlled trial	Sheida Majidzadeh, Mojgan Mirghafourvand, Mahmoud Farvareshi, Parisa Yavarikia	2023	IRCT20110826007418N7	Iran	PCOS	Upper-middle-income	Tabriz University of Medical Sciences	84	Parallel-group RCT	Single-center gynecology & infertility clinic (Al-Zahra Hospital)	No blinding possible (behavioral intervention); analysts unblinded	8 weekly group CBT sessions (60–90 min); skills training, cognitive restructuring, relaxation vs routine care	Psychological (depression, anxiety, QoL)	Not used	33	89.2
389	The effects of magnesium and vitamin E co-supplementation on parameters of glucose homeostasis and lipid profiles in patients with gestational diabetes	Maktabi M; Jamilian M; Amirani E; Chamani M; Asemi Z	2018	IRCT20170513033941N24	Iran	GDM	Upper-middle-income	Arak University of Medical Sciences	60	Randomized, double-blind, placebo-controlled	Single centre (Arak University of Medical Sciences)	Double-blind (participants + researchers)	250 mg/day magnesium oxide + 400 IU/day vitamin E vs placebo for 6 weeks	Glycemic and lipid biomarkers	Not used	29	78.4
390	Exploring the therapeutic impact of Salvia officinalis on lipid and oxidative stress markers in patients with PCOS – randomized placebo-controlled clinical trial	Arezoo Maleki-Hajiagha, Faraz Mojab, Fardin Amidi, Leila Amini	2025	IRCT201504146917N2	Iran	PCOS	Upper-middle-income	Iran University of Medical Sciences Grant 94–03-28-26521	70	Randomized placebo-controlled trial (parallel)	Gynecology clinics of Iran University of Medical Sciences	Double-blind (participants, outcome assessors, statistician)	330 mg Salvia officinalis extract daily × 8 weeks vs placebo	Clinical lab outcomes (lipid profile, oxidative stress)	Not reported	30	81.1
391	5α-Reductase inhibition prevents the luteal phase increase in plasma allopregnanolone levels and mitigates symptoms in women with PMDD	Martinez P.E., Rubinow D.R., Nieman L.K., Koziol D.E., Morrow A.L., Schiller C.E., Cintron D., Thompson K.D., Khine K.K., Schmidt P.J.	2016	Not registered	USA	PMDD	High-income	Intramural Research Program of NIMH, NIH; dutasteride supplied by GlaxoSmithKline	32	Randomized double-blind placebo-controlled cross-over trial with two separate dose-arms (0.5 mg and 2.5 mg)	Single centre (NIMH, NIH Clinical Center)	Double-blind (participants, investigators, clinicians)	Low-dose (0.5 mg/day) or high-dose (2.5 mg/day) dutasteride for 1 menstrual cycle vs placebo; one cycle single-blind placebo lead-in	Clinical (DRF symptoms), biochemical (steroid metabolites), hormonal	Not reported	35	94.6
392	Effect of Dietary Weight Loss on Menstrual Regularity in Obese Young Adult Women with Polycystic Ovary Syndrome	Tayseer M. Marzouk, Waleed A. Sayed Ahmed	2015	Not reported	Egypt	PCOS	Lower-middle-income	Not reported	60	Randomized controlled trial	Two centres: Faculty of Nursing + Obesity Clinic, Mansoura University	Unblinded	Intensive dietary education + calorie-restricted diet (500 kcal deficit) vs healthy diet without calorie restriction	Menstrual episodes; anthropometry; hirsutism	Not reported	22	59.5
393	GINEXMAL RCT: Induction of labour versus expectant management in gestational diabetes pregnancies	Gianpaolo Maso, Salvatore Alberico, Uri Wiesenfeld, Luca Ronfani, Anna Erenbourg, Eran Hadar, Yariv Yogev, Moshe Hod (for the GINEXMAL Study Cooperative Research Group)	2011	ClinicalTrials.gov NCT01058772	Italy (with sites in Israel, Slovenia, Sri Lanka, and others)	GDM	Mixed Income	Institute for Maternal and Child Health – IRCCS Burlo Garofolo (Trieste, Italy)	1760	Multicentre, open-label randomized controlled trial	Multicentre (9 hospitals: 5 Italy, 4 abroad)	Open-label (participants and clinicians unblinded; assessors partially blinded)	Induction of labour (dinoprostone PGE2, oxytocin, or Foley catheter) vs expectant management with close monitoring until 41 weeks	Clinical and perinatal	Not reported	28	75.7
394	Effects of two forms of combined oral contraceptives on carbohydrate metabolism in adolescents with polycystic ovary syndrome	George Mastorakos, Carolina Koliopoulos, Efthymios Deligeoroglou, Evanthia Diamanti-Kandarakis, George Creatsas	2006	None reported	Greece	PCOS	High-income	Not specified	36	Prospective randomized clinical trial	University hospital outpatient gynecology clinic	Hirsutism assessors blinded; otherwise unblinded	Group A: 0.15 mg desogestrel + 0.03 mg EE (21/7 cycle × 12 months). Group B: 2 mg cyproterone acetate + 0.035 mg EE (21/7 × 12 months).	Metabolic (insulin resistance, OGTT indices), endocrine (androgens, SHBG), cardiometabolic markers	No	27	73
395	Effect of dietary myo-inositol supplementation in pregnancy on the incidence of maternal gestational diabetes mellitus and fetal outcomes: a randomized controlled trial	Barbara Matarrelli, Ester Vitacolonna, Matteo D’Angelo, Giulia Pavone, Peter A. Mattei, Marco Liberati, Claudio Celentano	2013	NCT01342874	Italy	GDM	High-income	Folic acid + inositol sachets supplied by Italfarmaco SpA (no role in study conduct); no other external funding	75	Randomized, double-blind, placebo-controlled trial	High-Risk Pregnancy Unit, University “G. d’Annunzio” Chieti	Double-blind (participants + providers)	Myo-inositol 4 g/day + 400 mcg folic acid vs placebo 400 mcg folic acid daily	Maternal metabolic, obstetric, neonatal	Not reported	34	91.9
396	Effect of a pulse-based diet and aerobic exercise on bone measures and body composition in women with polycystic ovary syndrome: A randomized controlled trial	Laura E. McBreairty, Maryam Kazemi, Philip D. Chilibeck, Julianne J. Gordon, Donna R. Chizen, Gordon A. Zello	2020	NCT01288638	Canada	PCOS	High-income	Agriculture and Agri-Food Canada (Growing Forward II Pulse Science Cluster G00011676); Saskatchewan Pulse Growers G00014962; Canada Foundation for Innovation (29638); Saskatchewan Health Research Foundation	95	Randomized controlled trial (parallel, stratified)	Single academic centre	Single-blind: assessors blinded to diet allocation	Pulse-based diet (lentils/chickpeas/beans/peas ~150g/day dry) + aerobic exercise vs TLC diet + aerobic exercise, 16 weeks	Bone, metabolic, anthropometric	Not reported	29	78.4
397	Pilot Study of an Individualised Early Postpartum Intervention to Increase Physical Activity in Women with Previous Gestational Diabetes	Harold David McIntyre, Ann Peacock, Yvette D. Miller, Denise Koh, Alison L. Marshall	2012	ACTRN12608000280303	Australia	GDM	High-income	Diabetes Australia Research Trust; NHMRC Career Development Award	28	Pilot randomized controlled trial	Single tertiary maternity centre (Mater Mothers Hospital + University of Queensland)	Open-label	Supported Care (individualised exercise + telephone coaching) vs Usual Care (printed advice only)	Behavioural (physical activity), metabolic (HOMA-IR, glucose, insulin), anthropometric	None	23	62.2
398	The effects of letrozole and clomiphene citrate on ligands expression of Wnt3, Wnt7a, and Wnt8b in proliferative endometrium of women with polycystic ovarian syndrome	Shayesteh Mehdinejadiani, Fardin Amidi, Mehdi Mehdizadeh, Mahmood Barati, Leili Safdarian, Reza Aflatoonian, Ashraf Alyasin, Marzieh Aghahosseini, Azar Pazhohan, Parisa Hayat, Farzaneh Mohammadzadeh Kazorgah, Aligholi Sobhani	2018	Not reported	Iran	PCOS	Upper-middle-income	Tehran University of Medical Sciences research grant (No. 26168)	32	Randomized controlled trial (quasi-randomized; laboratory-based)	University hospital infertility and endocrinology centers	Open-label	Letrozole 5 mg/day for 5 days vs clomiphene citrate 100 mg/day for 5 days starting cycle day 3; compared with untreated PCOS and fertile controls	Molecular, histological, hormonal	Not reported	21	56.8
399	The effect of vitamin D supplementation on clinical symptoms and metabolic profiles in patients with endometriosis	Abolfazl Mehdizadehkashi, Samaneh Rokhgireh, Kobra Tahermanesh, Neda Eslahi, Sara Minaeian, Mansooreh Samimi	2021	IRCT20170513033941N60	Iran	Endometriosis	Upper-middle-income	Vice-Chancellor for Research, Iran University of Medical Sciences	60	Randomized double-blind placebo-controlled trial	Single-center (Rasoul Akram Hospital, Tehran)	Double-blind (participants + researchers)	Vitamin D 50,000 IU every 2 weeks × 12 weeks vs identical placebo	Clinical (pelvic pain, dyspareunia, dysmenorrhea), metabolic, inflammatory, oxidative stress	Not reported	32	86.5
400	Psychotherapy With Somatosensory Stimulation for Endometriosis-Associated Pain: A Randomized Controlled Trial	Karin Meissner, Annemarie Schweizer-Arau, Anna Limmer, Christine Preibisch, Roxana M. Popovici, Isabel Lange, Barbara de Oriol, Florian Beissner	2016	NCT01321840	Germany	Endometriosis	High-income	Horst Görtz Foundation; Theophrastus Foundation; Schweizer-Arau Foundation	67	Randomized, wait-list controlled clinical trial	Multicentre (university radiology + gynecology + private practice)	Unblinded; self-reported outcomes; MRI assessors independent	Psychotherapy + somatosensory stimulation (acupuncture-based, hypnotherapy, CBT, mindfulness) vs 3-month wait-list then treatment	Pain, QoL, psychological wellbeing	No	29	78.4
401	A randomized controlled trial of combination letrozole and clomiphene citrate or letrozole alone for ovulation induction in women with polycystic ovary syndrome	Mejia RB, Summers KM, Kresowik JD, Van Voorhis BJ	2019	NCT02802865	USA	PCOS	High-income	University of Iowa Dept. of OB/GYN; Davis Fund; Molinaro-Blonigan Research Fund; no role in study design	70	Open-label parallel RCT	Two academic reproductive medicine clinics	Open-label (no participant or investigator blinding); objective endpoint reduces bias	Letrozole 2.5 mg cycle days 3–7 vs. Letrozole 2.5 mg + Clomiphene 50 mg cycle days 3–7	Clinical (ovulation, pregnancy outcomes), safety, ultrasound parameters	Not reported	33	89.2
402	Effect of a Mediterranean Diet-Based Nutritional Intervention on the Risk of Developing Gestational Diabetes Mellitus and Other Maternal-Fetal Adverse Events in Hispanic Women Residents in Spain.	Melero V; GarcÃ­a de la Torre N; Assaf-Balut C; JimÃ©nez I; Del Valle L; DurÃ¡n A; BordiÃº E; Valerio JJ; Herraiz MA; Izquierdo N; TorrejÃ³n MJ; Runkle I; Barabash A; Rubio MA; Calle-Pascual AL	2020	RCT: ISRCTN84389045 Real-world study: ISRCTN13389832	Spain	GDM	High-income	Fundación para Estudios Endocrinometabolicos; Instituto de Salud Carlos III (Spain); FEDER (European Regional Development Fund)	260	Randomised controlled trial with a real-world implementation study	Single-centre, hospital-based (Hospital Clínico Universitario San Carlos, Madrid)	Open-label; no blinding of participants or care providers; outcome assessment based on objective clinical measures	Mediterranean diet–based nutritional intervention with increased intake of extra virgin olive oil (≥40 mL/day) and pistachios (25–30 g, ≥3 days/week); free provision of EVOO and pistachios in RCT intervention group only	Clinical maternal and neonatal outcomes	not mentioned	31	83.8
403	Comparison of the effect of two combinations of myo-inositol and D-chiro-inositol in women with polycystic ovary syndrome undergoing ICSI: a randomized controlled trial	Nicolas Mendoza, Maria Paz Diaz-Ropero, Miguel Aragon, Vicente Maldonado, Placido Llaneza, Juan Lorente, Raquel Mendoza-Tesarik, Jose Maldonado-Lobon, Monica Olivares, Juristo Fonolla	2019	NCT01850030	Spain	PCOS	High-income	Centre for Industrial Technological Development (CDTI); Biosearch Life (employees involved); funding IDI-20150571	60	Randomized, multicenter, double-blind, parallel-group RCT	Five clinical sites (Spain)	Quadruple-blind (participant, care provider, investigator, outcome assessor)	MYO 550 mg + DCI 150 mg twice daily vs MYO 550 mg + DCI 13.8 mg twice daily for 12 weeks	Reproductive (pregnancy, embryo quality), metabolic (HOMA-IR, testosterone), safety (OHSS)	Not reported	34	91.9
404	Pain Reduction With an Immersive Digital Therapeutic Tool in Women Living With Endometriosis-Related Pelvic Pain: Randomized Controlled Trial.	Merlot B; Dispersyn G; Husson Z; Chanavaz-Lacheray I; Dennis T; Greco-Vuilloud J; FougÃ¨re M; Potvin S; Cotty-Eslous M; Roman H; Marchand S	2022	ClinicalTrials.gov NCT04650516	France	Endometriosis	High-income	NR	45	Randomized, controlled, open-label, two-parallel-group interventional trial.	Single centre	None (open-label). Participants knew whether they received VR headset or tablet. No blinding of assessors.	Endocare (VR digital therapeutic): 20-minute immersive VR program using auditory (binaural beats, nature sounds) + visual bilateral stimulation in a 3D environment delivered via Oculus Quest headset. Control: 20-minute 2D tablet program with same duration and thematic environment but without VR immersion, binaural beats, or bilateral stimulations; only nature-sound soundtrack.	Pain intensity (11-point NRS); pain relief (5-point categorical scale); adverse events; subgroup differences by adenomyosis/surgery.	NR	27	73
405	Pain Reduction With an Immersive Digital Therapeutic Tool in Women Living With Endometriosis-Related Pelvic Pain: Randomized Controlled Trial	Benjamin Merlot, Garance Dispersyn, Zoé Husson, Isabella Chanavaz-Lacheray, Thomas Dennis, Juliette Greco-Vuilloud, Maxime Fougère, Stéphane Potvin, Maryne Cotty-Eslous, Horace Roman, Serge Marchand	2022	NCT04650516	France	Endometriosis	High-income	None declared; industry involvement (Lucine) acknowledged	45	Randomized controlled two-arm trial	Single specialized endometriosis clinic (IFEMEndo, Bordeaux)	Open-label; participants and clinicians not blinded; outcome self-reported	20-minute VR immersive treatment (Endocare) vs 2D tablet control	Clinical (pain intensity, pain relief)	IMMPACT pain outcome framework referenced	27	73
406	Relationship among chrononutrition, sleep, and glycemic control in women with gestational diabetes mellitus: a randomized controlled trial	Amalia Messika; Yoel Toledano; Eran Hadar; Eliassaf Shmuel; Riva Tauman; Raanan Shamir; Oren Froy	2022	NCT02916667	Israel	GDM	High-income	No financial support reported	103	RCT (parallel, 2-arm)	Single hospital maternal–fetal medicine unit	Investigators blinded; participants not blinded	Chrononutrition + sleep hygiene program vs usual GDM care	Clinical (glycemic control, neonatal LGA)	Not reported	30	81.1
407	A comparative study to illustrate the benefits of using ethinyl estradiol-cyproterone acetate over metformin in patients with polycystic ovarian syndrome	Noorhan S. Mhao, Ahmed S.A. Al-Hilli, Najah R. Hadi, Dina A. Jamil, Hayder A. Al-Aubaidy	2016	Not reported	Iraq	PCOS	Upper-middle-income	No external funding	26	Randomized clinical trial	Single teaching hospital infertility clinic	Not blinded	Metformin 500 mg BID ×3 months vs EE 35 μg + cyproterone acetate 2 mg (21/7) ×3 months	Clinical, hormonal, metabolic	Not reported	19	51.4
408	Effects of a modestly lower carbohydrate diet in gestational diabetes: a randomized controlled trial	Jelena Mijatovic, Jimmy Chun Yu Louie, Marion E.C. Buso, Fiona S. Atkinson, Glynis P. Ross, Tania P. Markovic, Jennie C. Brand-Miller	2020	ACTRN12616000018415	Australia	GDM	High-income	University of Sydney internal funding	46	Randomized controlled trial (parallel, 2-arm)	Antenatal clinics at Royal Prince Alfred Hospital and Campbelltown Hospital	Participants and all personnel except dietitian blinded	Modestly lower carbohydrate diet (~135 g/day) vs routine care diet (~180–200 g/day) for 6 weeks	Biochemical, dietary, pregnancy, neonatal	Not reported	30	81.1
409	Effectiveness of a blended mobile-based lifestyle intervention in women with glucose intolerance after recent GDM (MELINDA): a 1-year multicentre RCT	Minschart C, Myngheer N, Maes T, De Block C, Van Pottelbergh I, Abrams P, Vinck W, Leuridan L, Driessens S, Mathieu C, Billen J, Matthys C, Laenen A, Bogaerts A, Benhalima K	2024	NCT03559621	Belgium	GDM	High-income	University Hospitals Leuven; Novo Nordisk; Sanofi; AstraZeneca; Boehringer-Ingelheim; Lilly	240	Parallel-group RCT	8 diabetes/endocrine clinics (regional + university hospitals)	Open-label; outcome assessors not blinded	1-year blended lifestyle program: face-to-face counselling + smartphone app (diet & PA modules, dashboard) + monthly telephone coaching vs usual care	Clinical, metabolic, behavioural, psychosocial	Not used	32	86.5
410	Effectiveness of complementary pain treatment for women with deep endometriosis through Transcutaneous Electrical Nerve Stimulation (TENS): randomized controlled trial	Ticiana A.A. Mira, Paulo C. Giraldo, Daniela A. Yela, Cristina L. Benetti-Pinto	2015	RBR-3rndh6	Brazil	Endometriosis	Upper-middle-income	FAPESP (process 2013/11790-2)	22	Randomized controlled trial	Single tertiary hospital (Women’s Hospital, University of Campinas)	Non-blind	Acupuncture-like TENS (8 Hz, VIF, 30 min weekly ×8 wks) vs Self-applied TENS (85 Hz, 20 min twice daily ×8 wks) applied to S3–S4	Pain, dyspareunia, QoL	Not reported	25	67.6
411	Hormonal treatment isolated vs hormonal treatment + electrotherapy for pelvic pain control in deep endometriosis	Ticiana A.A. Mira, Daniela A. Yela, Sérgio Podgaec, Edmund C. Baracat, Cristina L. Benetti-Pinto	2020	NCT02769052	Brazil	Endometriosis	Upper-middle-income	CAPES (Brazil) + device donation from Medcell	101	Multicentre parallel-group RCT	Two university hospital outpatient clinics	None (open-label; participants aware of TENS use)	Self-applied TENS device (parasacral region, 20 min twice/day ×8 weeks) + hormonal therapy vs hormonal therapy alone	Clinical (pain), QoL, sexual function	Not reported	31	83.8
412	The impact of a daily smartphone-based feedback system among women with gestational diabetes on compliance, glycemic control, satisfaction, and pregnancy outcome: a randomized controlled trial	Hadas Miremberg, Tal Ben-Ari, Tal Betzer, Hagit Raphaeli, Rose Gasnier, Giulia Barda, Jacob Bar, Eran Weiner	2018	NCT02783612	Israel	GDM	High-income	None declared	126	Randomized controlled trial	Single tertiary university-affiliated medical center	Partial: Physicians seeing patients in clinic were unblinded; labor & neonatal staff blinded	Smartphone app (GlucoseBuddy) with daily individualized feedback vs routine biweekly clinic care	Clinical & biochemical	No	28	75.7
413	Comparison of 5-, 10-, and 15-Point Laparoscopic Ovarian Electrocauterization in Patients With Polycystic Ovarian Disease: A Prospective, Randomized Study	Nasrin Moghadami Tabrizi, Kazem Mohammad, Hormoz Dabirashrafi, Fahime Iravani Nia, Parisa Salehi, Babak Dabirashrafi, Shahram Shams	2005	Not reported	Iran	PCOS	Upper-middle-income	Dabirashrafi Fertility & Endoscopy Research Center	187	Prospective randomized study (RCT)	Single-centre	No blinding reported	5-point vs 10-point vs 15-point laparoscopic ovarian electrocauterization using unipolar cautery	Clinical reproductive outcomes (pregnancy, live birth)	Not used	21	56.8
414	Effects of omega-3 fatty acids supplementation on serum adiponectin levels and some metabolic risk factors in women with polycystic ovary syndrome	Elahe Mohammadi, Maryam Rafraf, Laya Farzadi, Mohammad Asghari-Jafarabadi, Siamak Sabour	2012	IRCT201011083664N3	Iran	PCOS	Upper-middle-income	Tabriz University of Medical Sciences (Nutrition Research Center)	64	Double-blind randomized controlled clinical trial	Outpatient obstetrics department, Alzahra Hospital	Double-blind	Omega-3 fatty acids 4 g/day (EPA 180 mg + DHA 120 mg per capsule × 4 capsules/day) vs placebo (liquid paraffin capsules) for 8 weeks	Biochemical (adiponectin, glucose, insulin, lipids, hs-CRP)	Not reported	26	70.3
415	A randomized controlled trial evaluating the effect of ethinyl estradiol during clomiphene citrate cycles among women with polycystic ovary syndrome	Ashraf Moini, Firoozeh Ahmadi, Nadia Jahangiri, Jila Ahmadi, Mohammad Reza Akhoond	2015	NCT01219101	Iran	PCOS	Upper-middle-income	Royan Infertility Research Center	154	Randomized, double-blind, placebo-controlled	Single fertility center (Royan Institute)	Double-blind (participants, clinicians, assessors)	CC 100 mg ×5 days + EE 0.05 mg ×5 days vs CC + placebo	Clinical, hormonal, ultrasonographic	Not reported	29	78.4
416	Gut microbiota composition and metagenomic responses to diet intervention and gestational diabetes in overweight and obese pregnant women	Kirsi Mokkala, Kati Pussinen, Janne Houttu, Kaisa Koivuniemi, Sofia Vahlberg, Kirsi Laitinen	2021	ClinicalTrials.gov NCT01922791	Finland	GDM	High-income	Academy of Finland; State Research Funding for Health Science; Diabetes Research Foundation, Finland	269	Parallel, two-arm, single-blind, randomised controlled dietary trial	Single-centre (University of Turku, Finland)	Single-blind (laboratory/statistical personnel); participants unblinded	High-fibre diet counselling (≥30 g/day fibre from whole grains, vegetables, fruits) vs standard care	Clinical and microbiological	Not reported	33	89.2
417	Metformin action over gut microbiota is related to weight and glycemic control in gestational diabetes mellitus: A randomized trial	María Molina-Vega, María J. Picón-César, Carolina Gutiérrez-Repiso, Andrea Fernández-Valero, Fuensanta Lima-Rubio, Stella González-Romero, Isabel Moreno-Indias, Francisco J. Tinahones	2022	EUDRACT 2015-000361-31 (EU-CTR)	Spain	GDM	High-income	Consejería de Salud y Familias de la Junta de Andalucía; Fundación SED; Instituto de Salud Carlos III (CIBER, JR20-00040, PI18/01160, PI21/01677)	58	Parallel, open-label, randomized clinical trial	Single-centre (University Hospital Virgen de la Victoria, Málaga)	Open-label (participants unblinded; lab staff blinded)	Metformin (850 mg, up to 2550 mg/day) vs insulin (detemir/aspart as needed)	Clinical and microbiological	Not reported	32	86.5
418	Effect of clomifene citrate plus metformin and clomifene citrate plus placebo on induction of ovulation in women with newly diagnosed polycystic ovary syndrome: randomised double blind clinical trial.	Moll E; Bossuyt PM; Korevaar JC; Lambalk CB; van der Veen F	2006	ISRCTN55906981	Netherlands	PCOS	High-income	Merck Santé, France (study medication supply)	225	Randomized, double-blind, placebo-controlled clinical trial	Multicentre (20 Dutch hospitals)	Double-blind (participants and investigators)	Metformin group: Clomifene citrate + metformin (up to 2000 mg/day) Placebo group: Clomifene citrate + placebo	Clinical (ovulation, pregnancy, clomifene resistance)	not specified	35	94.6
419	Does adding metformin to clomifene citrate lead to higher pregnancy rates in a subset of women with polycystic ovary syndrome?	Moll E; Korevaar JC; Bossuyt PM; van der Veen F	2008	not stated	Netherland	PCOS	High-income	Merck Sante France provided metformin and placebo tablets	225	Randomized, double-blind, placebo-controlled multicenter trial	20 Dutch hospitals (coordinated by Academic Medical Center, Amsterdam)	Double-blind	Clomifene citrate (50–150 mg/day for 5 days) + Metformin 500 mg 4/day versus Clomifene citrate + placebo	Ongoing pregnancy (viable at 12 weeks gestation), side effects, dropout rates	not reported	34	91.9
420	Metformin Compared With Glyburide in Gestational Diabetes: A Randomized Controlled Trial	Lisa E. Moore, Diana Clokey, Valerie J. Rappaport, Luis B. Curet	2010	NCT00965991	United States	GDM	High-income	Not reported; authors report no conflicts of interest	149	Randomized controlled trial	Single academic center (University of New Mexico)	Open-label (participants & clinicians unblinded)	Metformin 500–2000 mg/day vs Glyburide 5–20 mg/day	Maternal glycemic, obstetric, neonatal outcomes	No	30	81.1
421	The effectiveness of counseling based on acceptance and commitment therapy on body image and self-esteem in polycystic ovary syndrome: An RCT	Fatemeh Moradi, Akram Ghadiri-Anari, Ali Dehghani, Seyed Reza Vaziri, Behnaz Enjezab	2020	IRCT20180509039590N1	Iran	PCOS	Upper-middle-income	Shahid Sadoughi University of Medical Sciences, Yazd (Grant 5870)	52	Randomized controlled trial	Diabetes Research Center, Yazd	No blinding	8 weekly 90-min ACT group counseling sessions vs routine PCOS care	Psychological (body image concern, self-esteem)	Not reported	28	75.7
422	The effect of modifying dietary protein and carbohydrate in weight loss on arterial compliance and postprandial lipidemia in overweight women with polycystic ovary syndrome	Lisa J. Moran, Manny Noakes, Peter M. Clifton, Robert J. Norman	2010	Not reported	Australia	PCOS	High-income	University of Adelaide/CSIRO Collaborative Grant	46	Randomized controlled trial (parallel; pilot)	Single-centre academic research setting	Open-label	Low-protein diet (57% CHO, 16% protein) vs high-protein diet (43% CHO, 27% protein) with energy restriction for 12 weeks + 4 weeks maintenance	Vascular, metabolic	Not reported	26	70.3
423	Low-carbohydrate diet for the treatment of gestational diabetes mellitus: A randomized controlled trial	Cristina Moreno-Castilla, Marta Hernández, Merce Bergua, Maria C. Alvarez, Maria A. Arce, Karen Rodriguez, Montserrat Martínez-Alonso, Montserrat Iglesias, Magdalena Mateu, Maria D. Santos, Linda R. Pacheco, Yolanda Blasco, Eva Martin, Nuria Balsells, Nuria Aranda, Didac Mauricio	2013	ClinicalTrials.gov NCT00911404	Spain	GDM	High-income	Not reported (institutional support; public health-funded study)	152	Parallel, open-label, two-arm RCT	Single-centre (Hospital Universitari Arnau de Vilanova, Lleida)	Open-label (participants and clinicians unblinded; analysts blinded)	Low-carbohydrate diet (40% calories CHO, 40% fat, 20% protein) vs control (55% CHO, 25% fat, 20% protein)	Clinical	Not reported	31	83.8
424	Metformin improves pregnancy and live-birth rates in women with PCOS: A multicenter double-blind placebo-controlled RCT	Laure Morin-Papunen, Anni S. Rantala, Leila Unkila-Kallio, Aila Tiitinen, Maritta Hippeläinen, Antti Perheentupa, Helena Tinkanen, Risto Bloigu, Katri Puukka, Aimo Ruokonen, Juha S. Tapanainen	2012	None reported	Finland	PCOS	High-income	Finnish Medical Association; Academy of Finland	320	Multicentre double-blind placebo-controlled RCT	5 university hospitals	Double-blind: participants + clinicians + analysts blinded	Metformin (500–1000 mg up to 1500–2000 mg depending on BMI) vs identical placebo for 3 months; continued to week 12 of pregnancy	Clinical (PR, LBR, miscarriage), metabolic, hormonal	None reported	35	94.6
425	Can a Low–Glycemic Index Diet Reduce the Need for Insulin in Gestational Diabetes Mellitus? A randomized trial	Robert G. Moses, Megan Barker, Meagan Winter, Peter Petocz, Jennie C. Brand-Miller	2009	Not registered	Australia	GDM	High-income	Illawarra Diabetes Service; University of Sydney	63	Parallel RCT	Single-centre	Open-label; clinicians blinded to allocation	Low–GI diet vs high-fiber (high-GI) diet	Clinical	Not reported	29	78.4
426	Effect of green coffee supplementation on androgens level in women with polycystic ovary syndrome: A randomized clinical trial	Ahmad Mousavi, Ahmad Saedisomeolia, Mirsaeed Yekaninejad, Azam Ildarabadi, Mehrnoush Meshkani, Marzieh Vahid-Dastjerdi	2020	IRCT20180711040428N1	Iran	PCOS	Upper-middle-income	None (no financial support)	44	Randomized clinical trial (double-blind RCT)	Single-centre (university-affiliated setting, Tehran)	Double-blind (participants, investigators, lab blinded)	400 mg/day green coffee vs placebo for 6 weeks	Endocrine/metabolic	Not reported	33	89.2
427	Effects of a single post-partum injection of a high dose of vitamin D on glucose tolerance and insulin resistance in mothers with first-time gestational diabetes mellitus	H. Mozaffari-Khosravi, M. Hosseinzadeh-Shamsi-Anar, M-A. Salami, H. Hadinedoushan, M.R. Mozayan	2012	Not reported	Iran	GDM	Upper-middle-income	Shahid Sadoughi University of Medical Sciences	45	Parallel RCT	Single centre (Yazd Diabetes Research Centre)	Single-blind (laboratory/assay staff blinded to group allocation)	300,000 IU IM vitamin D3 once postpartum vs no supplementation	Biochemical (vitamin D, glucose, insulin indices)	None stated	27	73
428	Effectiveness of a comprehensive telemedicine intervention replacing standard care in gestational diabetes: a randomized controlled trial	Ana Munda, Zala Mlinaric, Petra Ana Jakin, Mojca Lunder, Drazenka Pongrac Barlovic	2023	ClinicalTrials.gov NCT05521893	Slovenia	GDM	High-income	None declared (institutional resources; University Medical Centre Ljubljana)	106	Parallel, randomized controlled trial	Single-centre (University Medical Centre Ljubljana)	Single-blind (assessors blinded; participants unblinded)	Comprehensive telemedicine system: smartphone app + remote glucose upload + monthly video consultations replacing in-person visits vs. standard monthly clinic visits	Clinical and behavioral	Yes – GDM core outcome set used (Egan et al., 2020)	32	86.5
429	Serum free fatty acid levels in PCOS patients treated with glucophage, magnesium oxide and spironolactone	Muneyyirci-Delale O., Kaplan J., Joulak I., Yang L., Von Gizycki H., Nacharaju V.L.	2013	None reported	USA	PCOS	High-income	Not stated	36	Randomized three-arm metabolic study (NO control arm)	Single academic medical center (SUNY Downstate)	Open-label	Metformin 500 mg BID vs magnesium oxide 400 mg BID vs spironolactone 50 mg BID ×12 weeks	Physiological (FFA, insulin, aldosterone, BP)	Not used	23	62.2
430	The effect of oral probiotics on glycemic control of women with gestational diabetes mellitus — a multicenter, randomized, double-blind, placebo-controlled trial	Zohar Nachum, Yuri Perlitz, Lilach Yacov Shavit, Galit Magril, Dana Vitner, Yaniv Zipori, Eran Weiner, Ayala Shevach Alon, Yael Ganor-Paz, Meirav Nezer, Noa Harel, Sofia Soltsman, Enav Yefet	2024	NCT03864549	Israel	GDM	High-income	Altman Research Institute	85	RCT (double-blind, placebo-controlled)	5 university medical centers	Double-blind (participants + providers)	Probiotic mixture (6 strains, 2 capsules/day) until delivery vs placebo	Glycemic, maternal, neonatal	No	34	91.9
431	Effect of hypocaloric high-protein, low-carbohydrate diet supplemented with fennel on androgenic and anthropometric indices in overweight and obese women with polycystic ovary syndrome: A randomized placebo-controlled trial	Azadeh Nadjarzadeh, Akram Ghadiri-Anari, Nahid Ramezani-Jolfaie, Mohammad Mohammadi, Amin Salehi-Abargouei, Seyedeh Mahdieh Namayande, Hassan Mozaffari-Khosravi, Elham Hosseini-Marnani	2021	IRCT20120913010826N28	Iran	PCOS	Upper-middle-income	Not explicitly stated; institutional academic support implied (no conflicts reported)	64	Randomized placebo-controlled 2×2 factorial RCT	Two outpatient medical centers (Yazd, Iran)	Double-blind (participants + investigators)	Four arms: (1) hypocaloric standard diet + fennel; (2) hypocaloric high-protein diet + fennel; (3) hypocaloric standard diet + placebo; (4) hypocaloric high-protein diet + placebo	Clinical & biochemical (anthropometric + androgen indices)	Not reported	30	81.1
432	MCT-modified ketogenic diet as an adjunct to standard treatment regimen could alleviate clinical symptoms in women with endometriosis	Fatemeh Naeini, Fatemeh Davari Tanha, Maryam Mahmoudi, Hastimansooreh Ansar, Mohammad Javad Hosseinzadeh-Attar	2025	IRCT20131125015536N15	Iran	Endometriosis	Upper-middle-income	Tehran University of Medical Sciences (Grant #73845)	50	Randomized controlled clinical trial	Hospital infertility clinic (Yas Hospital Complex, Tehran)	No blinding; open-label dietary intervention	Intervention: MCT-modified ketogenic diet (70–80% fat; 15–20% protein; 5–10% carbohydrates) + standard therapy (OCP). Control: OCP only, normal diet maintained. 12-week duration.	Clinical (pelvic pain, dyspareunia, dyschezia), anthropometric (weight, BMI, WC), biochemical (lipids, AST, ALT)	Not reported	28	75.7
433	Primary prevention of gestational diabetes for women who are overweight and obese: a randomised controlled trial	Cate Nagle, Helen Skouteris, Heather Morris, Alison Nankervis, Bodil Rasmussen, Peter Mayall, Richard L. Kennedy	2013	ACTRN12613000125729	Australia	GDM	High-income	Quality and Patient Safety Strategic Research Centre, Deakin University	370	Randomised controlled trial (individual-level)	Primary care (30 general practices, rural/regional Victoria)	Open-label; data analyst blinded	EDGE program – weekly alternating phone/text/email motivational interviewing for behaviour change vs usual care	Clinical, behavioural, psychological	Not specified	31	83.8
434	Impact of a lifestyle promotion program on anthropometric and clinical manifestations in adolescents with polycystic ovary syndrome: a randomized controlled trial	Fatemeh Nahidi, Fahimeh Ramezani Tehrani, Delaram Ghodsi, Mahdi Jafari, Hamid Alavi Majd, Somayeh Abdolahian	2024	IRCT20200114046123N1	Iran	PCOS	Upper-middle-income	No external funding reported	128	Cluster randomized controlled trial (CRT)	School-based, 8 high schools across Tehran	Assessor-blinded statistician only; participants, teachers, and trainers not blinded (open-label)	8-session lifestyle program (diet, exercise, behavior change, PCOS-tailored modules) delivered over 2 months (partly online during COVID); WhatsApp educational materials; parent session included	Clinical (anthropometry, menstrual cycle, acne, hirsutism, hair loss), behavioral (physical activity, diet)	Not reported	29	78.4
435	Flaxseed intervention and reproductive endocrine profiles in patients with polycystic ovary syndrome	Zahra Najdgholami, Fatemeh Maleki Sedgi, Samira Sadat Ghalishourani, Marzieh Feyzpour, Mehran Rahimlou	2025	IRCT20120704010181N11	Iran	PCOS	Upper-middle-income	Ahvaz Jundishapur University of Medical Sciences	70	Open-label RCT	Single-centre endocrinology clinic	Open-label; lab technicians blinded	30 g milled flaxseed daily + lifestyle vs lifestyle only for 12 weeks	Hormonal and metabolic	Not reported	27	73
436	Effect of the insulin sensitizers metformin and pioglitazone on endothelial function in young women with polycystic ovary syndrome: a prospective randomized study.	Naka KK; Kalantaridou SN; Kravariti M; Bechlioulis A; Kazakos N; Calis KA; Makrigiannakis A; Katsouras CS; Chrousos GP; Tsatsoulis A; Michalis LK	2011	not reported	Greece	PCOS	High-income	not reported	43	Prospective, randomized, single-centre trial	Academic hospital outpatient setting	Not blinded (open-label)	Metformin (duration 6 months) Pioglitazone (duration 6 months) Compared with healthy control group	Endothelial function (flow-mediated dilation, nitrate-mediated dilation) Insulin resistance indices (ISI, glucose-to-insulin ratio, IAUC120) Lipid profile (LDL, HDL, total cholesterol) Hormonal markers (total testosterone, FAI) Anthropometric measurements (weight, BMI, waist circumference)	not reported	24	64.9
437	Modulation of hormonal, metabolic, inflammatory and oxidative stress biomarkers in women with PCOS following combined (resistance & endurance) training: RCT	Masoud Nasiri, Amirabbas Monazzami, Solmaz Alavimilani, Zatollah Asemi	2024 (corrected 2025)	IRCT20130812014333N143	Iran	PCOS	Upper-middle-income	None (explicitly stated)	30	Randomized controlled trial (parallel)	Single center (Imam Reza Hospital, Kermanshah)	None (open-label)	8-week combined training: resistance 50–70% 1RM + endurance 60–70% THR; 3×/week; vs control (no structured training)	Metabolic, hormonal, oxidative stress, inflammatory	None reported	32	86.5
438	The effects of synbiotic supplementation on hormonal status, biomarkers of inflammation and oxidative stress in subjects with polycystic ovary syndrome: a randomized, double-blind, placebo-controlled trial	Khadijeh Nasri, Mehri Jamilian, Elham Rahmani, Fereshteh Bahmani, Maryam Tajabadi-Ebrahimi, Zatollah Asemi	2018	IRCT201509115623N53	Iran	PCOS	Upper-middle-income	Research Deputy of Arak University of Medical Sciences	60	Randomized double-blind placebo-controlled clinical trial	Single outpatient gynecology clinic (Kossar Clinic, Arak)	Double-blind (participants and investigators)	Synbiotic capsules (L. acidophilus, L. casei, B. bifidum, 2×10⁹ CFU each + 0.8 g inulin) daily × 12 weeks vs placebo	Clinical (hirsutism), biochemical (hormones, inflammation, oxidative stress), metabolic (insulin, HOMA-IR)	Not reported	33	89.2
439	Comparison of metformin and N-acetyl cysteine, as an adjuvant to clomiphene citrate, in clomiphene-resistant women with polycystic ovary syndrome	M. Nemati, S. Nemati, A-M. Taheri, B. Heidari	2017	NR	Iran	PCOS	Upper-middle-income	NR (acknowledgements thank university but no funding source listed)	108	Prospective randomized controlled trial	Two centres (university infertility clinic + private practice)	None (no blinding described)	NAC 1800 mg/day + CC vs metformin 1500 mg/day + CC	Hormonal, metabolic, clinical, fertility	No	27	73
440	The steroid metabolome in women with premenstrual dysphoric disorder during GnRH agonist-induced ovarian suppression: effects of estradiol and progesterone addback	Nguyen T.V., Reuter J.M., Gaikwad N.W., Rotroff D.M., Kucera H.R., Motsinger-Reif A., Smith C.P., Nieman L.K., Rubinow D.R., Kaddurah-Daouk R., Schmidt P.J.	2017	NIMH Protocols NCT00001259 & NCT00001322	USA	PMDD	High-income	NIH Intramural Research Program	30	Double-blind randomized crossover clinical trial	Single centre (NIMH, USA)	Double-blind (participants, clinicians)	GnRH agonist (Lupron)–induced ovarian suppression; then estradiol addback vs progesterone addback under crossover conditions	Biochemical (steroid metabolites), symptom ratings	Not reported	30	81.1
441	A Web-Based Lifestyle Intervention for Women With Recent Gestational Diabetes Mellitus	Jacinda M. Nicklas, Chloe A. Zera, Lucinda J. England, Bernard Rosner, Edward Horton, Sue Levkoff, Ellen W. Seely	2014	NCT01158131	USA	GDM	High-income	CDC Cooperative Agreement MM-1094–09/09; NIH T32AT000051; NIH K24HL096141	75	Randomized controlled trial (parallel-group)	Brigham & Women’s Hospital (single center)	Single-blind (measurements performed by blinded staff; participants & lifestyle coaches unblinded)	“Balance after Baby” web-based lifestyle program vs routine postpartum care	Clinical (weight, BMI), metabolic (glucose, HbA1c), behavioral (diet/activity), psychological (EPDS)	Not reported	33	89.2
442	Employing a multi-level approach to recruit a representative sample of women with recent gestational diabetes mellitus into a randomized lifestyle intervention trial	Jacinda M. Nicklas, Geraldine Skurnik, Chloe A. Zera, Liberty G. Reforma, Sue E. Levkoff, Ellen W. Seely	2016	ClinicalTrials.gov NCT01158131	United States	GDM	High-income	Centers for Disease Control (CDC MM-1094-09/09); NIH (T32AT000051, HL007609, HD057022, HL096141)	75	Parallel randomized controlled trial	Single tertiary care hospital (Brigham and Women’s Hospital, Boston)	Single-blind (statisticians blinded)	Web-based lifestyle program for diabetes prevention vs control (standard postpartum care)	Recruitment and feasibility	Not applicable	31	83.8
443	Effect of holistic yoga program on anxiety symptoms in adolescent girls with polycystic ovarian syndrome: A randomized control trial	Ram Nidhi, Venkatram Padmalatha, Raghuram Nagarathna, Ram Amritanshu	2012	Not reported	India	PCOS	Lower-middle-income	Central Council for Research in Yoga & Naturopathy (Government of India, Ministry of Health)	90	Two-arm randomized controlled trial	Residential girls’ college campus	Double blinding not possible; outcome assessors (ultrasonologist, lab staff, statistician) blinded	Holistic yoga (asanas + pranayama + relaxation + yoga philosophy counselling) vs matched physical exercise module	Psychological (state & trait anxiety) and clinical	None reported	26	70.3
444	The effect of calorie-restriction along with thylakoid membranes of spinach on the gut-brain axis pathway and oxidative stress biomarkers in obese women with polycystic ovary syndrome: a randomized, double-blind, placebo-controlled clinical trial	Negin Nikrad, Mahdieh Abbasalizad Farhangi, Fatemeh Pourteymour Fard Tabrizi, Maryam Vaezi, Ata Mahmoudpour, Mehran Mesgari-Abbasi	2023	IRCT20140907019082N9	Iran	PCOS	Upper-middle-income	Vice-Chancellor for Research, Tabriz University of Medical Sciences (grant 69252)	48	Randomized, double-blind, placebo-controlled clinical trial	Two outpatient centers (Al-Zahra infertility clinic and Sheykholrais Polyclinic, Tabriz)	Double-blind (participants and researchers); placebo matched in color/flavor	5 g/day spinach thylakoid-rich extract vs 5 g cornstarch placebo, both with individualized hypocaloric diet (–500 kcal/day) for 12 weeks	Biochemical (LPS, BDNF, S100B, oxidative stress markers), metabolic (FBG, insulin, HOMA-IR), hormonal, anthropometric	Not reported	32	86.5
445	Metformin compared with insulin in the management of gestational diabetes mellitus: A randomized clinical trial	Shirin Niromanesh, Azin Alavi, Fatemeh Rahimi Sharbaf, Nooshin Amjadi, Sanaz Moosavi, Soheila Akbari	2012	Not reported	Iran	GDM	Upper-middle-income	Not reported	160	Randomized controlled trial	Three university hospitals (Women’s Hospital, Shariati, Valiasr)	Single-blind (clinicians blinded; participants not blinded)	Metformin (500–2500 mg/day) vs Insulin (NPH ± regular insulin)	Maternal glycemic + neonatal outcomes	Not reported	29	78.4
446	Effect of an Exercise Intervention on Gestational Diabetes Mellitus: A Randomized Controlled Trial	Carrie Nobles, Bess H. Marcus, Edward J. Stanek III, Barry Braun, Brian W. Whitcomb, Caren G. Solomon, JoAnn E. Manson, Glenn Markenson, Lisa Chasan-Taber	2015	ClinicalTrials.gov NCT00728377	United States	GDM	High-income	NIH/NIDDK Grant R01 DK074876	290	Parallel, two-arm randomized controlled trial	Single-centre (Baystate Medical Center, Massachusetts)	Participants unblinded; statisticians blinded	12-week individually tailored, motivationally matched exercise program (based on TTM and SCT) vs health/wellness education control	Clinical and metabolic	Not reported	34	91.9
447	Supplementation with vitamin D or Ï‰-3 fatty acids in adolescent girls and young women with endometriosis (SAGE): a double-blind, randomized, placebo-controlled trial.	Nodler JL; DiVasta AD; Vitonis AF; Karevicius S; Malsch M; Sarda V; Fadayomi A; Harris HR; Missmer SA	2020	NCT02387931	USA	Endometriosis	High-income	not specified	69	Randomized, double-blind, placebo-controlled trial	Single-center (Boston Center for Endometriosis)	Double-blind (participants and investigators)	1. Vitamin D supplementation 2. Fish oil supplementation 3. Placebo	Clinical outcomes (VAS pain, SF-12 QoL, catastrophic thinking, medication use), biochemical outcomes (25(OH)D, ω-3 levels)	not reported	31	83.8
448	Randomized comparison of the influence of dietary management and/or physical exercise on ovarian function and metabolic parameters in overweight women with polycystic ovary syndrome	Asa Nybacka, Kjell Carlström, Agneta Ståhle, Sven Nyren, Per Martin Hellström, Angelica Linden Hirschberg	2011	None reported	Sweden	PCOS	High-income	Swedish Research Council; Karolinska Institutet; Stockholm County Council; A.M. Thomer Fund	57	3-arm randomized controlled trial	University hospital women’s health research unit	Not blinded (open-label lifestyle trial)	4-month individualized diet program (−600 kcal/day) vs individualized exercise program vs both combined; monthly review with dietician/physiotherapist	Clinical (menstrual cyclicity, ovulation), metabolic, endocrine, body composition (DXA)	Not reported	35	94.6
449	Can the Onset of Type 2 Diabetes Be Delayed by a Group-Based Lifestyle Intervention in Women with Prediabetes following Gestational Diabetes Mellitus (GDM)? Findings from a Randomized Control Mixed Methods Trial	Angela O’Dea, Marie Tierney, Brian E. McGuire, John Newell, Liam G. Glynn, Irene Gibson, Eoin Noctor, Andrii Danyliv, Susan B. Connolly, Fidelma P. Dunne	2015	Not specified (protocol: Trials 2013;14:121)	Ireland	GDM	High-income	Health Research Board of Ireland (ICE/2011/3)	50	Mixed methods RCT (parallel, 2-arm)	Single-centre (Galway University Hospital & Croí Heart Centre)	Single-blind (statisticians blinded)	12-week MyAction lifestyle programme (weekly 2.5-hour sessions: exercise, education, individual goal-setting) vs standard care (GP follow-up, pamphlets)	Clinical, behavioural, psychosocial	Not reported	28	75.7
450	Screening for gestational diabetes mellitus in primary versus secondary care: The clinical outcomes of a randomized controlled trial	Angela O’Dea, Marie Tierney, Andriy Danyliv, Liam G. Glynn, Brian E. McGuire, Louise Carmody, John Newell, Fidelma P. Dunne	2016	Not registered	Ireland	GDM	High-income	Health Research Board of Ireland	781	Parallel-group RCT	Multicentre (3 hospitals + GP practices)	Not blinded	Screening location (Primary care GP vs Hospital-based secondary care OGTT)	Maternal & neonatal clinical outcomes	Standard GDM outcome set used	30	81.1
451	Metformin treatment in patients with polycystic ovary syndrome undergoing in vitro fertilization: a prospective randomized trial.	Onalan G; PabuÃ§cu R; Goktolga U; Ceyhan T; Bagis T; Cincik M	2005	not reported	Turkey	PCOS	Upper-middle-income	not reported	110	Prospective, randomized, double-blind, placebo-controlled trial	Single fertility center (Centrum IVF Clinic, Ankara)	Double-blind (patients + investigators)	Metformin 850 mg twice or three times daily (based on BMI) for 8 weeks prior to and during IVF/ICSI cycle vs identical placebo	Clinical outcomes (pregnancy rates), embryology outcomes, ovarian response measurements	not reported	29	78.4
452	Design of FitFor2 study: the effects of an exercise program on insulin sensitivity and plasma glucose levels in pregnant women at high risk for gestational diabetes	Nicolette Oostdam, Mireille NM van Poppel, Elisabeth MW Eekhoff, Maurice GAJ Wouters, Willem van Mechelen	2009	NTR1139	Netherlands	GDM	High-income	ZonMw (Netherlands Organisation for Health Research and Development)	160	Randomised controlled trial (prevention)	13 centres (3 hospitals, 10 midwifery practices)	Outcome assessors blinded; participants unblinded	Twice-weekly structured 60-min supervised exercise program (aerobic + strength) vs usual care	Maternal glycaemia, insulin resistance, neonatal birth weight	No	33	89.2
453	Cost-effectiveness of an exercise program during pregnancy to prevent gestational diabetes: results of an economic evaluation alongside a randomised controlled trial.	Oostdam N; Bosmans J; Wouters MG; Eekhoff EM; van Mechelen W; van Poppel MN	2012	NTR1139	Netherlands	GDM	High-income	Netherlands Organisation for Health Research and Development (ZonMw); Netherlands Organisation for Scientific Research (NWO)	121	Randomised controlled trial with an economic evaluation (cost-effectiveness and cost-utility analyses)	Multicentre (hospitals and midwifery practices)	Open-label for participants and providers; outcome assessment blinded where applicable	Supervised FitFor2 exercise programme (two 60-minute sessions per week combining aerobic and strength exercises) versus usual care	Clinical outcomes and economic outcomes (cost-effectiveness, cost-utility)	not mentioned	27	73
454	Mothers after Gestational Diabetes in Australia (MAGDA): A Randomised Controlled Trial of a Postnatal Diabetes Prevention Program	Sharleen L. O’Reilly, James A. Dunbar, Vincent Versace, Edward Janus, James D. Best, Rob Carter, Jeremy J.N. Oats et al.	2016	ACTRN12610000338066	Australia	GDM	High-income	National Health and Medical Research Council (NHMRC) Partnership Projects; Victorian Department of Health; SA Health; Diabetes Victoria	573	Multicenter randomized controlled trial (open-label)	Community and academic health centres in Melbourne & Adelaide	Open-label	Postnatal diabetes prevention program: 1 individual session, 5 group sessions, 2 telephone follow-ups vs usual care	Anthropometric, metabolic, behavioral	Not reported	32	86.5
455	Gestagen versus oral contraceptive pills to induce withdrawal bleeding before induction of ovulation by clomiphene citrate in polycystic ovary syndrome	Yasser Ibrahim Orief, Emad Abd Elmoneem Darwish, Mohamed Abdelmoaty Elsamra, Dina Hassan Aly Ragab	2014	Not reported	Egypt	PCOS	Lower-middle-income	Personally funded by researchers	50	Randomized controlled trial	Integrated Fertility Center + Agial Fertility Center	Open-label	Gestagen (Cidolut Nor 5 mg, 2/day ×5 days) vs OCP (Cilest, 1/day ×21 days), then CC 100 mg ×5 days	Ovulation and pregnancy outcomes	Not reported	34	91.9
456	Oral contraceptives versus physical exercise on cardiovascular and metabolic risk factors in women with polycystic ovary syndrome: a randomized controlled trial	F. Orio, G. Muscogiuri, F. Giallauria, S. Savastano, P. Bottiglieri, D. Tafuri, P. Predotti, G. Colarieti, A. Colao, S. Palomba	2016	NCT00593294	Italy	PCOS	High-income	University “Parthenope” Naples; University Hospital “S. Giovanni di Dio e Ruggi d’Aragona” Salerno	150	Randomized, double-blind, placebo-controlled, parallel-group RCT	University endocrine & cardiology units (hospital-based)	Double-blind for OCs vs placebo; exercise intervention unblinded but outcome assessors blinded	(1) OCs (30 μg EE + 3 mg drospirenone) for 6 months; (2) SETP: 45 min cycling 3×/week at 60–70% VO2max; (3) placebo multivitamin tablets + all groups on uniform high-protein hypocaloric diet	Cardiovascular, hormonal, metabolic, anthropometric	Not reported	28	75.7
457	Vitamin D and probiotic co-supplementation affects mental health, hormonal, inflammatory and oxidative stress parameters in women with polycystic ovary syndrome	Vahidreza Ostadmohammadi; Mehri Jamilian; Fereshteh Bahmani; Zatollah Asemi	2019	IRCT20170513033941N37	Iran	PCOS	Upper-middle-income	National Institute for Medical Research Development (NIMAD), Iran (Grant No. 965372)	60	Randomized, double-blind, placebo-controlled trial	Single outpatient gynecology clinic (Kashan)	Double-blind (participants and investigators)	Vitamin D 50,000 IU every 2 weeks + probiotic 8×10⁹ CFU/day vs placebo for 12 weeks	Hormonal, psychological, inflammatory, oxidative	Not reported	33	89.2
458	Relugolix, an oral gonadotropin-releasing hormone (GnRH) receptor antagonist, in women with endometriosis-associated pain: phase 2 safety and efficacy 24-week results.	Osuga Y; Seki Y; Tanimoto M; Kusumoto T; Kudou K; Terakawa N	2021	NCT01452685 (ClinicalTrials.gov, registered 17/10/2011)	Japan	Endometriosis	High-income	Takeda Pharmaceutical Company Limited (study sponsor; involved in design, data analysis, manuscript writing)	487	Phase 2 randomized, open-label, parallel-group extension study following a preceding double-blind RCT	Multicentre (101 clinics in Japan)	Open-label extension study.	Relugolix (oral, once daily): • 10 mg • 20 mg • 40 mg Comparators: • Placebo (oral) • Leuprorelin 3.75 mg injection every 4 weeks	Safety + efficacy outcomes (pain and physiology)	not mentioned	30	81.1
459	Relugolix, an oral gonadotropin-releasing hormone receptor antagonist, reduces endometriosis-associated pain in a dose-response manner: a randomized, double-blind, placebo-controlled study.	Yutaka Osuga, Yoshifumi Seki, Masataka Tanimoto, Takeru Kusumoto, Kentarou Kudou, Naoki Terakawa	2021	NCT01458301	Japan	Endometriosis	High-income	Takeda Pharmaceutical Company Ltd.	487	Phase 2 RCT	108 hospitals/clinics nationwide	Double-blind for participants & investigators; double-dummy tablets + injections	Relugolix 10/20/40 mg daily vs placebo vs leuprorelin 3.75 mg monthly for 12 weeks	Clinical (pain), hormonal, QoL, safety	Not used	35	94.6
460	Myo-inositol administration positively effects ovulation induction and intrauterine insemination in patients with polycystic ovary syndrome: a prospective, controlled, randomized trial	Özlen Emekçi Özay, Ali Cenk Özay, Erkan Çağlıyan, Recep Emre Okyay, Bülent Gülekli	2017	Not reported	Turkey	PCOS	Upper-middle-income	None declared	196	Prospective randomized controlled trial	Academic reproductive endocrinology center (Dokuz Eylul University) + affiliated state hospital	No blinding; open-label	Group 1 (MYO): MYO 4 g/day + folic acid 400 mg/day for 12 weeks before COH + IUI; continued until 10 days after IUI. Group 2: Folic acid only; no MYO. Both groups received recombinant FSH stimulation.	Reproductive (pregnancy rate, ovulation rate); metabolic (insulin, HOMA-IR); COH efficiency (dose, duration); cycle cancellation	Not used	27	73
461	Comparison of metabolic and hormonal profiles between Low-AGEs and Standard-AGEs weight-loss diets in overweight phenotype-A PCOS patients: randomized controlled trial	Merve Ozdemir, Sezcan Mumusoglu, Pelin Bilgic	2025	NCT05830487	Türkiye	PCOS	Upper-middle-income	TÜBİTAK 222S038 (public research funding)	44	Randomized controlled trial (parallel)	University hospital	Open-label	12-week Low-AGEs diet (reduced AGEs via cooking method changes) vs Standard calorie-restricted diet	Metabolic & hormonal	Not reported	31	83.8
462	Effect of myo-inositol and melatonin versus myo-inositol, in a randomized controlled trial, for improving in vitro fertilization of patients with polycystic ovarian syndrome	Alessandro Pacchiarotti, Gianfranco Carlomagno, Gabriele Antonini, Arianna Pacchiarotti	2016 (online 2015)	NCT01540747	Italy	PCOS	High-income	None stated; melatonin + MI supplement manufactured by Lo.Li.Pharma; one author employed by Farmares SRL	569	Randomized, controlled, double-blind clinical trial	Single IVF center (Praxi Pro Vita, Rome)	Double-blind (participants + investigators)	Control: folic acid 400 mcg/day. Group A: MI 4000 mg + folic acid 400 mcg + melatonin 3 mg/day. Group B: MI 4000 mg + folic acid 400 mcg/day. Duration: day 1 of menstrual cycle → 14 days post-embryo transfer. Long GnRH agonist protocol used for stimulation.	Clinical (pregnancy, implantation), embryologic (oocyte maturity, embryo grade), biochemical (intracellular melatonin levels)	No	33	89.2
463	Randomized controlled trial of the impact of ursodeoxycholic acid on glycemia in gestational diabetes mellitus (The GUARDS Trial)	Catalina de Paco Matallana, Jose E. Blanco-Carnero, Ana Company Calabuig, Manuela Fernandez, Monika Lewanczyk, Matilda Burton, Xi Yang, Alice L. Mitchell, Anita Lovgren-Sandblom, Hanns-Ulrich Marschall, David Wright, Caroline Ovadia, Kypros H. Nicolaides, Catherine Williamson	2025	IMIB-GU-2019-02	Spain	GDM	High-income	Fetal Medicine Foundation; JP Moulton Foundation; Tommy’s; NIHR	113	Double-blind randomized placebo-controlled trial	Single tertiary hospital (Virgen de la Arrixaca, Murcia)	Double-blind (participants, clinicians, assessors)	UDCA 500 mg BID vs placebo from 24–30 weeks until delivery	Metabolic (glycemia, lipids), maternal & neonatal clinical outcomes	No	35	94.6
464	A randomized controlled trial evaluating metformin pre-treatment and co-administration in non-obese insulin-resistant women with polycystic ovary syndrome treated with controlled ovarian stimulation plus timed intercourse or intrauterine insemination	Stefano Palomba, Angela Falbo, Francesco Orio Jr, Francesco Manguso, Tiziana Russo, Achille Tolino, Annamaria Colao, Brian Dale, Fulvio Zullo	2005	Not reported	Italy	PCOS	High-income	Not stated (no funding declarations in article)	70	Double-blind RCT	University hospital reproductive endocrinology units	Double-blind: patients and operators blinded; identical metformin vs placebo tablets	Metformin 850 mg twice daily for 3 months + during COS vs placebo + COS with hpFSH	Clinical (ovulation, pregnancy, mono-ovulation, OHSS), hormonal, stimulation parameters	None reported	32	86.5
465	Laparoscopic ovarian diathermy vs clomiphene citrate plus metformin as second-line strategy for infertile anovulatory patients with PCOS	Stefano Palomba, Angela Falbo, Lucia Battista, Tiziana Russo, Roberta Venturella, Achille Tolino, Francesco Orio, Fulvio Zullo	2010	NCT00558077	Italy	PCOS	High-income	None (authors report no external funding)	50	Randomized controlled trial	Two academic centres (Catanzaro & Naples)	Not blinded (surgery vs medication)	LOD vs CC (up to 250 mg) + metformin (850→1700 mg/day)	Fertility outcomes	Not reported	34	91.9
466	Six weeks of structured exercise training and hypocaloric diet increases the probability of ovulation after clomiphene citrate in overweight and obese patients with PCOS	S. Palomba, A. Falbo, F. Giallauria, T. Russo, M. Rocca, A. Tolino, F. Zullo, F. Orio	2010	NCT0100468	Italy	PCOS	High-income	Not specifically stated; no commercial funding reported	96	Parallel, randomized controlled trial	University reproductive medicine unit	Single-blind (assessor blind only)	SET + hypocaloric diet for 6 weeks (Group A); CC 150 mg for 5 days after 2-week observation (Group B); SET + diet for 6 weeks + CC after week 2 (Group C)	Reproductive (ovulation, menstruation), metabolic, hormonal	Not reported	34	91.9
467	Metformin reduces risk of ovarian hyperstimulation syndrome in patients with polycystic ovary syndrome during gonadotropin-stimulated inÂ vitro fertilization cycles: a randomized, controlled trial.	Palomba S; Falbo A; Carrillo L; Villani MT; Orio F; Russo T; Di Cello A; Cappiello F; Capasso S; Tolino A; Colao A; Mastrantonio P; La Sala GB; Zullo F; Cittadini E	2011	NCT01233206	Italy	PCOS	High-income	NR	120	Parallel, randomized, double-blind, placebo-controlled clinical trial	Multicentre (academic hospitals and IVF centres	Double-blind (participants, clinicians, and investigators).	Metformin 500 mg three times daily vs identical placebo, started with GnRH-agonist pretreatment and continued throughout ovarian stimulation until pregnancy test or menses.	clinical (Safety/complication outcome (OHSS incidence and severity); reproductive outcomes (cancellation, pregnancy, live birth); stimulation parameters.)	NR	36	97.3
468	Does metformin affect the ovarian response to gonadotropins for IVF in patients with PCOS and reduced ovarian reserve? A randomized controlled trial	Stefano Palomba, Angela Falbo, Annalisa Di Cello, Fulvio Cappiello, Achille Tolino, Fulvio Zullo	2011	NCT01208740	Italy	PCOS	High-income	Not reported	88	Randomized, double-blind, placebo-controlled clinical trial	Two academic hospitals + one private IVF clinic	Double-blind (participants, clinicians, investigators)	Metformin 500 mg TID for 1 month pre-IVF + stimulation vs placebo	Clinical reproductive outcomes + biochemical	Not reported	30	81.1
469	Effects of Cognitive Behavioral Therapy for Diet on Postprandial Glucose and Pregnancy Outcomes in Gestational Diabetes Mellitus: Multicenter Randomized Controlled Trial	Ying Pan, Jia Tang, Bing Lu, Ming Kuang, Mengjie Zhao, Hongying Liu, Shao Zhong	2025	ChiCTR2100048527	China	GDM	Upper-middle-income	Suzhou Science & Technology Project (SKY2022025); Kunshan R&D Project (KS2214)	200	Multicenter, parallel-group RCT	Four hospitals	Open-label (no blinding)	12-week CBT-based digital dietary intervention via WeChat mini-program (3 sessions/week); vs standard care	Glycemic, psychological, neonatal outcomes	Not used	33	89.2
470	Efficacy of very low-calorie ketogenic diet with the Pronokal® method in obese women with PCOS: a 16-week randomized controlled trial	Pandurevic S, Mancini I, Mitselman D, Magagnoli M, Teglia R, Fazzeri R, Dionese P, Cecchetti C, Caprio M, Moretti C, Sicinska J, Agostini A, Gazineo D, Godino L, Sajoux I, Fanelli F, Meriggiola CM, Pagotto U, Gambineri A	2023	NCT04801173	Italy (Bologna)	PCOS	High-income	Pronokal Group®	30	Open-label parallel RCT	Single centre endocrine/gyn unit	Open-label; outcome assessors for hormones & ovarian morphology were not blinded	VLCKD (Pronokal method: 8 wks ketogenic 600–800 kcal/day + 8 wks LCD) vs Mediterranean low-calorie diet (16 weeks)	Clinical, metabolic, hormonal, reproductive	Not reported	34	91.9
471	Oxidative stress and outcome of antioxidant supplementation in patients with polycystic ovarian syndrome (PCOS)	Abubakar A. Panti, Constance E. Shehu, Yusuf Saidu, Karima A. Tunau, Emmanuel I. Nwobodo, Abdulgafar Jimoh, Lawal S. Bilbis, Atteque B. Umar, Mairo Hassan	2018	None reported	Nigeria	PCOS	Lower-middle-income	Usmanu Danfodiyo University Sokoto research grant	200	Single-blind (participants blinded) randomized controlled trial	Single tertiary university teaching hospital	Single-blind (participants only)	Vitacap® antioxidant capsule daily × 6 months vs placebo (ferrous fumarate 100 mg); both also received clomiphene citrate for ovulation induction	Clinical (pregnancy, live birth, menstrual regularity) and biochemical (GPx, SOD, CAT, MDA, vitamins, minerals)	None reported	28	75.7
472	Continuous glucose monitoring results in lower HbA1c in Malaysian women with insulin-treated gestational diabetes: a randomized controlled trial	S.S. Paramasivam, K. Chinna, A.K.K. Singh, J. Ratnasingam, L. Ibrahim, L.L. Lim, A.T.B. Tan, S.P. Chan, P.C. Tan, S.Z. Omar, R.W. Bilous, S.R. Vethakkan	2018	NCT02204657	Malaysia	GDM	Upper-middle-income	UM Research Grant, University Malaya	50	Prospective open-label RCT	Single tertiary centre (University Malaya Medical Centre)	Open-label; no participant/provider blinding	Retrospective CGM (6-day sensor at 28, 32, 36 weeks) vs standard antenatal care with CBG	Clinical and biochemical outcomes	Not reported	31	83.8
473	Efficacy and safety of eliapixant in endometriosis-associated pelvic pain: the randomized, placebo-controlled phase 2b SCHUMANN study	Susanne Parke, Kerstin Gude, Katrin Roth, Fabrizio Messina	2024	NCT04614246	20 countries (Europe, North America, China, Japan)	Endometriosis	Mixed Income	Bayer AG	215	Randomized, double-blind (to placebo), active-comparator–controlled, phase 2b, dose-finding parallel-group RCT	Multicenter (144 sites across 20 countries)	Double-blind for eliapixant vs placebo; open-label elagolix comparator	Eliapixant 25 mg BID, 75 mg BID, 150 mg BID vs placebo; elagolix 150 mg QD as comparator	Clinical (EAPP), PROs, safety, biochemical (LFTs, labs)	Not reported	34	91.9
474	Persistence of dysmenorrhea and nonmenstrual pain after optimal endometriosis surgery may indicate adenomyosis.	Parker JD; Leondires M; Sinaii N; Premkumar A; Nieman LK; Stratton P	2006	not reported	USA	Endometriosis	High-income	Intramural Research Program of the NICHD, NIH	53	Prospective clinical trial	Government research hospital (NIH Clinical Center)	Open-label for surgery; double-blind for raloxifene/placebo	Surgical excision of all endometriosis lesions; postoperative raloxifene 180 mg/day vs placebo for 6 months (biopsy-proven endometriosis only)	Dysmenorrhea severity (VAS), nonmenstrual pain severity (VAS), correlation with JZ thickness	no	30	81.1
475	A 1-week sleep and light intervention improves mood in premenstrual dysphoric disorder in association with shifting melatonin offset time earlier	Barbara L. Parry, Charles J. Meliska, L. Fernando Martinez, Ana M. Lopez, Diane L. Sorenson, Sharron E. Dawes, Jeffrey A. Elliott, Richard L. Hauger	2023	NCT01799733	USA	PMDD	High-income	NIH R01 AT007169	44	Randomized, counterbalanced crossover RCT	Single academic research center (UCSD)	Blinded raters for mood; participants unblinded to intervention timing	Phase-advance intervention (Late-night wake therapy + Morning bright light) vs Phase-delay intervention (Early-night wake therapy + Evening bright light)	Clinical (mood), biological (melatonin timing), behavioral (sleep/wake)	Not used	32	86.5
476	True and sham acupuncture produced similar frequency of ovulation and improved LH to FSH ratios in women with polycystic ovary syndrome.	Pastore LM; Williams CD; Jenkins J; Patrie JT	2011	not reported	Denmark	PCOS	High-income	not reported	84	Randomized, double-blinded, placebo-controlled crossover trial	Single-center	Double-blind	Metformin vs placebo	Serum AMH, androgen, insulin levels	not reported	29	78.4
477	The modulating effects of vitamin D on the activity of β-catenin in the endometrium of women with endometriosis: a randomized exploratory trial	Azar Pazhohan, Shahla Danaei-Mehrabad, Zhila Mohamad-Rezaeii, Fardin Amidi, Mahshad Khodarahmian, Maryam Shabani Nashtaei, Aligholi Sobhani, Mir Ali Farajzadeh	2021 (online 2020)	IRCT2015081823678N1	Iran	Endometriosis	Upper-middle-income	Research Deputy of Tehran University of Medical Sciences (grant 930330-26813)	34	Randomized exploratory clinical trial	Single tertiary-care academic infertility center	Not blinded; open-label supplementation	Weekly 50,000 IU Vitamin D for 12–14 weeks + routine protocol vs routine protocol only	Molecular/biochemical (β-catenin activity, mRNA, protein expression) and clinical (vitamin D levels)	No	30	81.1
478	A Randomised Controlled Trial to Delay or Prevent Type 2 Diabetes after Gestational Diabetes: Walking for Exercise and Nutrition to Prevent Diabetes for You (WENDY)	A.S. Peacock, F.E. Bogossian, S.A. Wilkinson, K.S. Gibbons, C. Kim, H.D. McIntyre	2015	ACTRN12611000075987	Australia	GDM	High-income	Mater Hospital Golden Casket Nursing & Midwifery Scholarship; Mater Foundation Research Grants; Mater Health Services; Australian Postgraduate Award; University of Queensland support	31	Two-arm parallel RCT	Single tertiary maternity hospital	Outcome assessor blinded for data analysis; participants unblinded	Web-linked pedometer program + 4-week nutrition coaching vs wait-list control	Clinical, behavioural, metabolic	Not reported	31	83.8
479	Quinagolide vaginal ring for reduction of endometriotic lesions: results from the QLARITY trial	Antonio Pellicer, Hugh S. Taylor, Angel Alberich-Bayarri, Yan Liu, Michael Gamborg, Kathryn E. Barletta, Philippe Pinton, Patrick W. Heiser, Yu Z. Bagger	2025	NCT03749109	Poland, Germany, Denmark	Endometriosis	High-income	Ferring Pharmaceuticals	67	Randomized, double-blind, placebo-controlled Phase 2 trial	Multicenter (6 sites across 3 European countries)	Double-blind (participants, investigators, radiologists, staff, MRI analysts)	Quinagolide extended-release vaginal ring vs placebo for 4 menstrual cycles	Imaging, clinical, biochemical, PRO outcomes	Not used	34	91.9
480	Intensive Medical Nutrition Therapy Alone or with Added Metformin to Prevent Gestational Diabetes Mellitus among High-Risk Mexican Women: A Randomized Clinical Trial	Otilia Perichart-Perera, Jennifer Mier-Cabrera, Claudia M. Flores-Robles, Nayeli Martínez-Cruz, Lidia Arce-Sánchez, Itzel N. Alvarado-Maldonado, Araceli Montoya-Estrada, José Romo-Yañez, Ameyalli M. Rodríguez-Cano, Guadalupe Estrada-Gutierrez, Salvador Espino y Sosa, Mario Guzmán-Huerta, Rodrigo Ayala-Yañez, Enrique Reyes-Muñoz	2022	ClinicalTrials.gov NCT01675310	Mexico	GDM	Upper-middle-income	CONACYT (Mexico, Grant No. 151819); Instituto Nacional de Perinatología	90	Parallel, open-label, randomized controlled trial	Single-centre (Instituto Nacional de Perinatología, Mexico City)	Open-label (participants and clinicians unblinded; assessors blinded)	Intensive MNT + metformin 850 mg twice daily vs intensive MNT alone (monthly dietitian visits, <50% carbohydrates, individualized goal-setting)	Clinical	Not reported	33	89.2
481	Efficacy, safety and lack of immunogenicity of insulin aspart compared with regular human insulin for women with gestational diabetes mellitus	D.J. Pettitt, P. Ospina, C. Howard, H. Zisser, L. Jovanovic	2007	Not registered (pre-ICTRP era)	United States	GDM	High-income	Novo Nordisk Inc. (industry-supported); Sansum Diabetes Research Institute	27	Parallel, open-label randomized controlled trial	Single-centre (Sansum Diabetes Research Institute, Santa Barbara, CA)	Open-label (clinicians/participants unblinded; lab assessors blinded)	Insulin aspart (IAsp, 5 min pre-meal) vs human insulin (HI, 30 min pre-meal) + NPH basal insulin	Clinical and biochemical	Not reported	29	78.4
482	Effect of prenatal counseling on postpartum follow-up and contraceptive use in women with gestational diabetes mellitus: a randomized controlled trial	Chadakarn Phaloprakarn; Sasiwan Suthasmalee	2023	TCTR20210330001	Thailand	GDM	Upper-middle-income	Navamindradhiraj University Research Fund; Faculty of Medicine Vajira Hospital Fund	280	Parallel 1:1 RCT	Single tertiary university hospital	Outcome assessors blinded; participants & counselors unblinded	Prenatal 20-min counseling on T2DM risk, glucose screening & contraception at 35–36 wks + routine postnatal counseling vs routine postnatal counseling only	Behavioural (screening attendance; contraceptive uptake)	Not reported	32	86.5
483	Randomized controlled trial of prepregnancy lifestyle intervention to reduce recurrence of gestational diabetes mellitus	Suzanne Phelan; Elissa Jelalian; Donald Coustan; Aaron B. Caughey; Kristin Castorino; Todd Hagobian; Karen Muñoz-Christian; Andrew Schaffner; Laurence Shields; Casey Heaney; Angelica McHugh; Rena R. Wing	2023	NCT02763150	USA	GDM	High-income	NICHD R01HD084282	199	Parallel 1:1 RCT	Two clinical research centers (California, Rhode Island)	Assessment staff blinded; participants/interventionists unblinded	16-week behavioural weight-loss program (diet, PA, counselling) + maintenance until conception vs educational control only	Clinical (GDM recurrence); behavioural (weight loss, behaviours)	Not reported	31	83.8
484	Cardiovascular autonomic modulation differences between moderate-intensity continuous and high-intensity interval aerobic training in women with PCOS: A randomized trial	Stella V. Philbois, Victor B. Ribeiro, Jens Tank, Rosana Maria dos Reis, Darius A. Gerlach, Hugo C.D. Souza	2022	RBR-78qtwy	Brazil	PCOS	Upper-middle-income	São Paulo Research Foundation (FAPESP 2015/14031-0, 2018/08569-6, 2018/17892-5)	75	Randomized controlled trial (3-arm)	Single-center (Ribeirão Preto Medical School, University of São Paulo)	Open-label (no participant or investigator blinding)	MICT (60 min, 70–80% HR reserve) vs HIIT (2-min high at 85–90% HRR + 3-min low, 35–45 min/session) vs control	Autonomic, hormonal, metabolic, cardiovascular	Not reported	30	81.1
485	Comparison of universal screening for gestational diabetes mellitus between one-step and two-step method among Thai pregnant women: A randomized control trial	Natthaphon Phoblap, Phudit Jatavan, Theera Tongsong	2025	TCTR20240805007	Thailand	GDM	Upper-middle-income	Not stated (academic departmental funding, Chiang Mai University)	143	Randomized controlled trial	Single tertiary centre (Maharaj Nakorn Chiang Mai Hospital, Chiang Mai University)	Open-label (participants and clinicians unblinded; analysts blinded)	One-step (75 g 2h OGTT, IADPSG criteria) vs two-step (50 g GCT + 100 g OGTT, Carpenter–Coustan criteria)	Clinical and diagnostic outcomes	Not reported	32	86.5
486	Mild gestational diabetes in pregnancy and the adipoinsular axis in babies born to mothers in the ACHOIS randomised controlled trial	Louise K. Pirc, Julie A. Owens, Caroline A. Crowther, Kristyn Willson, Miles J. De Blasio, Jeffrey S. Robinson	2007	Linked to ACHOIS Trial (NCT00115913)	Australia	GDM	High-income	ACHOIS funded by National Health and Medical Research Council (NHMRC), Australia	95	Parallel randomised controlled trial (ACHOIS substudy)	Multicentre (Australia)	Not stated; likely open-label	Treatment of mild GDM (dietary advice, BGL monitoring, insulin as needed) vs routine care (no GDM intervention)	Clinical and biochemical (cord blood hormone concentrations)	Not reported	31	83.8
487	Comparison between effects of myo-inositol and D-chiro-inositol on ovarian function and metabolic factors in women with PCOS	Alfonsa Pizzo, Antonio Simone Laganà, Luisa Barbaro	2014 (online 2013)	Not reported	Italy	PCOS	High-income	None declared; authors state no financial/proprietary interests	50	Double-blind randomized controlled trial	Single center (University of Messina)	Double-blind (participants and investigators blinded)	MYO 4 g/day + folic acid 400 µg/day × 6 months vs DCI 1 g/day + folic acid 400 µg/day × 6 months	Clinical (cycle regularity, hirsutism), biochemical (hormones, insulin resistance), metabolic (BP, SHBG)	No	29	78.4
488	A novel smartphone app to change risk behaviors of women after gestational diabetes: A randomized controlled trial	Anne L. Potzel, Christina Gar, Friederike Banning, Vanessa Sacco, Andreas Fritsche, Louise Fritsche, Karsten Müssig, Laura Dauben, Jochen Seissler, Andreas Lechner	2022	DRKS00012996	Germany	GDM	High-income	DZD; Else-Kröner Fresenius Foundation	66	Parallel randomized controlled trial	Multicentre (3 clinics)	Open-label	TRIANGLE smartphone app vs flyer lifestyle advice	Behavioural & metabolic	No	31	83.8
489	The effects of spinach-derived thylakoid supplementation in combination with calorie restriction on anthropometric parameters and metabolic profiles in obese women with polycystic ovary syndrome: a randomized, double-blind, placebo-controlled clinical trial	Fatemeh Pourteymour Fard Tabrizi, Mahdieh Abbasalizad Farhangi, Maryam Vaezi, Salar Hemmati	2020	IRCT20140907019082N9	Iran	PCOS	Upper-middle-income	Vice-Chancellor for Research, Tabriz University of Medical Sciences (Grant 59918); Iran National Science Foundation (Grant #96013888)	48	Randomized double-blind placebo-controlled trial	University-affiliated gynecology, infertility, and polyclinic centers	Double-blind (participants, investigators, analysts)	Thylakoid-rich spinach extract 5 g/day (sachet before lunch) + calorie-restricted diet vs matched placebo (cornstarch) + calorie-restricted diet for 12 weeks	Anthropometric, metabolic, hormonal	Not reported	34	91.9
490	Impact of myoinositol with metformin and myoinositol alone in infertile PCOS women undergoing ovulation induction cycles – randomized controlled trial	Priyanka Prabhakar, Reeta Mahey, Monica Gupta, Rajesh Khadgawat, Garima Kachhawa, Jai Bhagwan Sharma, Perumal Vanamail, Rajesh Kumari, Neerja Bhatla	2021 (online Sept 2020)	Not reported	India	PCOS	Lower-middle-income	No financial relationship stated; free drug samples provided by Eris Lifesciences Ltd. & Akumentis Healthcare Ltd.	116	Randomized controlled trial	Single tertiary referral infertility center (AIIMS New Delhi)	No blinding—open-label	Group I: myoinositol 4 g/day + metformin 1500 mg/day; Group II: myoinositol 4 g/day; both tried natural conception 3 months → OI cycles with letrozole ± gonadotropins	Clinical (pregnancy outcomes) & biochemical (metabolic/hormonal markers)	No	30	81.1
491	The Effect of Oligopin Supplementation on Hormonal and Metabolic Profiles in the Polycystic Ovary Syndrome: A Randomized Controlled Trial	Mostafa Qorbani, Milad Sanginabadi, Mohammad Reza Mohajeri-Tehrani, Sara Karimi, Hadis Gerami, Armita Mahdavi-Gorabi, Nooshin Shirzad, Majid Samadi, Fereshteh Baygi, Saeed Hosseini, Asieh Mansour	2020	IRCT20140406017139N3	Iran	PCOS	Upper-middle-income	Alborz University of Medical Sciences; Endocrinology and Metabolism Research Institute (Tehran University of Medical Sciences)	80	Randomized, double-blind, placebo-controlled clinical trial	Multicenter (three university hospitals in Tehran)	Double-blind (participants, investigators, outcome assessors)	Oligopin 50 mg/day vs placebo (maltodextrin) for 3 months	Hormonal, metabolic, anthropometric, safety	None reported	33	89.2
492	Continuous Glucose Monitoring Feedback in the Subsequent Development of Gestational Diabetes: A Pilot, Randomized, Controlled Trial in Pregnant Women	Phaik Ling Quah, Lay Kok Tan, Ngee Lek, Shephali Tagore, Bernard Su Min Chern, Seng Bin Ang, Ann Wright, Serene Pei Ting Thain, Kok Hian Tan	2024	ClinicalTrials.gov NCT05123248	Singapore	GDM	High-income	Integrated Platform for Research in Advancing Metabolic Health Outcomes in Women and Children (IPRAMHO) – Singapore Ministry of Health’s National Medical Research Council (NMRC/CG/C008A/2017_KKH)	206	Prospective pilot randomized controlled trial	Single-centre (KK Women’s and Children’s Hospital, Singapore)	Open-label (participants aware; assessors blinded)	Intermittent scanning CGM with glucose feedback (“unblinded”) vs masked CGM without feedback (“blinded”), applied at 9–13, 18–23, 24–31, and 32–33 weeks	Clinical, metabolic, behavioral	Not reported	32	86.5
493	The impact of metronidazole on pain persistence after fertility-sparing endometriosis surgery: METROFERT randomized study	Amira Quevedo, Shivani Parikh, Jonathan Reinstine, Petra Chamseddine, Jeremy T. Gaskins, Cathy Whalen, Shan Biscette, Resad Paya Pasic	2025	NCT04554693	United States	Endometriosis	High-income	University of Louisville	88	Randomized, multicenter, double-blind, placebo-controlled	Two centers (University of Louisville; Norton Women’s & Children’s Hospital)	Double-blind (participants, investigators, assessors, pharmacist, statistician)	Oral metronidazole 250 mg TID ×14 days vs placebo capsules	Pain, QOL, sexual function, surgical safety	No	34	91.9
494	Insulin sensitiser agents alone and in co-treatment with r-FSH for ovulation induction in PCOS women	Emanuela Raffone, Pietro Rizzo, Vincenzo Benedetto	2010	Not reported	Italy	PCOS	High-income	Not reported	120	Randomized controlled trial	Single-centre university hospital IVF unit	Open-label	Metformin 1500 mg/day vs myo-inositol 4 g + folic acid 400 mg daily; r-FSH 37.5 IU/day added if no pregnancy	Reproductive (ovulation, pregnancy), hormonal	Not reported	28	75.7
495	Effects of atorvastatin on vascular function, inflammation, and androgens in women with polycystic ovary syndrome: a double-blind, randomized, placebo-controlled trial.	Raja-Khan N; Kunselman AR; Hogeman CS; Stetter CM; Demers LM; Legro RS	2011	NCT00529542	USA	PCOS	High-income	NIH Grants (K12HD055882, GCRC M01 RR10732, C06 RR016499), Pfizer research grant; Pfizer provided atorvastatin	20	Double-blind randomized placebo-controlled trial	Single-center (Penn State Hershey Medical Center)	Participants, intervention administrators, and outcome assessors all blinded (double-blind)	Atorvastatin 40 mg/day vs. placebo for 6 weeks	Vascular function, biochemical, metabolic, endocrine outcomes	not reported	31	83.8
496	High-dose vitamin D supplementation and measures of insulin sensitivity in polycystic ovary syndrome: a randomized, controlled pilot trial	Raja-Khan N., Shah J., Stetter C., Lott M., Kunselman A., Dodson W., Legro R.	2014	NCT00907153	USA	PCOS	High-income	Penn State College of Medicine Dean’s Feasibility Grant; NIH NCATS UL1TR000127; BTR Group provided drug/placebo	28	Randomized double-blind placebo-controlled trial	Single academic medical center	Double-blind	Vitamin D3 12,000 IU/day × 12 weeks vs placebo	Clinical (BP), metabolic (OGTT, QUICKI, HOMA-IR), hormonal, inflammatory	Not reported	30	81.1
497	The effect of mindfulness-based art therapy (MBAT) on the body image of women with polycystic ovary syndrome (PCOS): a randomized controlled trial	Zahra Ramazanian Bafghi, Atefeh Ahmadi, Firoozeh Mirzaee, Masumeh Ghazanfarpour	2024	IRCT20170611034452N9 (registered 25/01/2020)	Iran	PCOS	Upper-middle-income	Kerman University of Medical Sciences (Grant 98000704)	66	Randomized, single-blind, parallel-arm RCT	Multiple healthcare centers and women’s/midwifery clinics affiliated with Kerman University of Medical Sciences	Single-blind: MBAT (8 online sessions, 90–120 min, twice weekly, 4 weeks) vs waiting-list control	Psychological (body image total score; multiple MBSRQ domains)	Baseline, immediately post-intervention, 1-month follow-up	ANOVA/ANCOVA; effect sizes (partial eta², Cohen’s d, SMD); Little’s MCAR test; complete case analysis	29	78.4
498	One-step versus two-step screening for diagnosis of gestational diabetes mellitus in Iranian population: A randomized community trial	Fahimeh Ramezani Tehrani, Maryam Rahmati, Farshad Farzadfar, Mehrandokht Abedini, Maryam Farahmand, Farhad Hosseinpanah, Farzad Hadaegh, Farahnaz Torkestani, Majid Valizadeh, Fereidoun Azizi, Samira Behboudi-Gandevani	2023	IRCT138707081281N1	Iran	GDM	Upper-middle-income	National Institute for Medical Research Development (Grant IR.NIMAD.REC.1394.013); Research Institute for Endocrine Sciences, Shahid Beheshti University of Medical Sciences	28771	Cluster randomized community trial (non-inferiority design)	Multicentre (five provinces, national health system)	Outcome assessors blinded	One-step 75 g 2-h OGTT vs Two-step (50 g GCT + 100 g OGTT if positive)	Clinical (maternal & neonatal)	Not reported	36	97.3
499	Genetic variants for prediction of gestational diabetes mellitus and modulation of susceptibility by a nutritional intervention based on a Mediterranean diet	Ana Ramos-Levi, Ana Barabash, Johanna Valerio, Nuria García de la Torre, Leire Mendizabal, Mirella Zulueta, Maria Paz de Miguel, Ángel Díaz, Alejandra Durán, Cristina Familiar, Inés Jiménez, Laura del Valle, Verónica Melero, Inmaculada Moraga, Miguel A. Herraiz, María José Torrejon, Maddi Arregi, Laureano Simón, Miguel A. Rubio, Alfonso L. Calle-Pascual	2022	ISRCTN84389045; ISRCTN13389832	Spain	GDM	High-income	Instituto de Salud Carlos III (PI20/01758); Ministerio de Ciencia e Innovación (PREDIGES RTC2019-007406-1); FEDER (EU)	1573	Parallel randomized controlled trial with nested genetic analysis + real-world arm	Single-centre (Hospital Clínico San Carlos, Madrid)	Open-label (dietary intervention; laboratory analysis blinded)	Mediterranean diet (EVOO + pistachios, 40 mL/day + 25–30 g/day) vs standard low-fat diet	Clinical (GDM incidence) and genomic	Not reported	34	91.9
500	Using technology to support care in gestational diabetes mellitus: Quantitative outcomes of an exploratory randomised control trial of adjunct telemedicine for gestational diabetes mellitus (TeleGDM)	Tshepo M. Rasekaba, John Furler, Doris Young, Danny Liew, Kathleen Gray, Irene Blackberry, Wen Kwang Lim	2018	ACTRN12614000934640	Australia	GDM	High-income	Northern Foundation small project grant; Australian Postgraduate Award; Melbourne Networked Society Institute scholarship	95	Randomised controlled trial	Single tertiary hospital + linked community services	Not blinded (clinicians required access to data)	Telemedicine adjunct to usual care using Online Health Portfolio vs usual care with handwritten diary	Clinical, service utilisation, metabolic	Not reported	28	75.7
501	The effects of calcium-vitamin D and metformin on polycystic ovary syndrome: A pilot study	Batool Rashidi; Fedieh Haghollahi; Mamak Shariat; Farid Zayerii	2009	Not reported	Iran	PCOS	Upper-middle-income	Tehran University of Medical Sciences	60	Randomized clinical pilot trial (3-arm parallel)	Single university reproductive health center	Open-label	Calcium 1000 mg + vitamin D 400 IU/day vs calcium-vitamin D + metformin 1500 mg/day vs metformin 1500 mg/day for 3 months, with 3-month follow-up	Reproductive, ovulatory	Not reported	24	64.9
502	Effect of High Versus Low Carbohydrate Intake in the Morning on Glycemic Variability and Glycemic Control Measured by Continuous Blood Glucose Monitoring in Women with Gestational Diabetes Mellitus—A Randomized Crossover Study	Louise Rasmussen, Maria Lund Christensen, Charlotte Wolff Poulsen, Charlotte Rud, Alexander S. Christensen, Jens R. Andersen, Ulla Kampmann, Per G. Ovesen	2020	ClinicalTrials.gov NCT03835208	Denmark	GDM	High-income	Vissing Fonden, Kirsten Dyrlev Madsens Grant, University of Copenhagen, Novo Nordisk Foundation, Danish Diabetes Academy	12	Randomized crossover clinical trial	Single-centre (Aarhus University Hospital)	Single-blind (investigators blinded; participants aware)	Two isocaloric diet sequences: high-carb morning (50% CHO in morning) vs low-carb morning (10% CHO morning; 50% dinner) each for 4 days, 4–5 day washout	Metabolic/biochemical	Not reported	29	78.4
503	Prevention of Diabetes in Women with a History of Gestational Diabetes: Effects of Metformin and Lifestyle Interventions	Robert E. Ratner, Costas A. Christophi, Boyd E. Metzger, Dana Dabelea, Peter H. Bennett, Xavier Pi-Sunyer, Sarah Fowler, Steven E. Kahn, and the Diabetes Prevention Program Research Group	2008	Not specified (DPP registered as NCT00004992)	United States	GDM	High-income	National Institutes of Health (NIDDK, NICHD, NIA, CDC, ADA, IHS, others)	2190	Parallel, three-arm RCT (DPP subset analysis)	Multicentre (27 U.S. academic & Indian Health Service sites)	Open-label (participants & staff); outcome assessors blinded	1) Intensive lifestyle (ILS): 7% weight loss target, ≥150 min/wk PA; 2) Metformin 850 mg twice daily; 3) Placebo + standard lifestyle advice	Clinical (T2DM incidence by OGTT)	Not reported	31	83.8
504	Rosiglitazone treatment alleviates inflammation and improves liver function in overweight women with polycystic ovary syndrome: a randomized placebo-controlled study	Katrina Rautio; Juha S. Tapanainen; Aimo Ruokonen; Laure C. Morin-Papunen	2007	Not reported	Finland	PCOS	High-income	Academy of Finland; Sigrid Jusélius Foundation; Oulu University Hospital	30	Randomized double-blind placebo-controlled trial	University hospital gynecology & endocrinology departments	Double-blind (participants and investigators)	Rosiglitazone 4 mg/day for 2 weeks then 8 mg/day for 4 months vs placebo	Metabolic, inflammatory, hepatic	Not reported	27	73
505	The IVF-LUBE trial – A randomized trial to assess Lipiodol® uterine bathing effect in women with endometriosis or repeat implantation failure undergoing IVF	Shelley J. Reilly, Elizabeth J. Glanville, Bharati Dhorepatil, Lucy R. Prentice, Ben W. Mol, Neil P. Johnson	2019	NCT00894946	New Zealand & India	Endometriosis	Mixed Income	Auckland District Health Board Research Fund; University of Auckland Research Committee; Auckland Medical Research Foundation	70	Randomised controlled trial	Multicentre (IVF clinics in NZ and Pune, India)	Open-label (not possible to blind participants/clinicians)	Lipiodol® uterine bathing via HSG vs no intervention before IVF	Fertility/reproductive outcomes	Not reported	30	81.1
506	Glibenclamide and metfoRmin versus stAndard care in gEstational diabeteS (GRACES): a feasibility open label randomised trial	Rebecca M. Reynolds, Fiona C. Denison, Ed Juszczak, Jennifer L. Bell, Jessica Penneycard, Mark W.J. Strachan, Robert S. Lindsay, Claire I. Alexander, Corinne D.B. Love, Sonia Whyte, Fiona Mackenzie, Ben Stenson, Jane E. Norman	2017	NCT02080377	United Kingdom	GDM	High-income	Chief Scientist Office, Scotland (CZH/4/1011); Tommy’s	23	Feasibility open-label randomised controlled trial	Multicentre (5 NHS hospitals in Scotland)	Open-label; outcome assessors unblinded	Metformin + Glibenclamide (2.5–20 mg/day) vs Metformin + Insulin	Clinical + feasibility	Not specified	26	70.3
507	Effects of continuous and intermittent aerobic physical training on hormonal and metabolic profile, and body composition in women with PCOS: A randomized controlled trial	Victor B. Ribeiro, Gislaine S. Kogure, Iris P. Lopes, Rafael C. Silva, Daiana C.C. Pedroso, Anderson S. de Melo, Hugo C.D. de Souza, Rui A. Ferriani, Cristiana L.M. Furtado, Rosana M. dos Reis	2020	ISRCTN10416750	Brazil	PCOS	Upper-middle-income	São Paulo State Research Foundation (FAPESP 2015/14031-0)	110	Prospective 3-arm randomized controlled trial	University hospital outpatient clinic + physiology lab	Unblinded (exercise intervention)	Continuous aerobic training (CAT) vs intermittent aerobic training (IAT) vs no-training control for 16 weeks	Clinical, biochemical, anthropometric	Not reported	31	83.8
508	Short-Term Aerobic Exercise Did Not Change Telomere Length While It Reduced Testosterone Levels and Obesity Indexes in PCOS: A Randomized Controlled Clinical Trial Study	Victor Barbosa Ribeiro, Daiana Cristina Chielli Pedroso, Gislaine Satyko Kogure, Iris Palma Lopes, Barbara A. Santana, Hugo C. Dutra de Souza, Rui A. Ferriani, Rodrigo T. Calado, Cristiana L. Miranda Furtado, Rosana M. dos Reis	2021	ReBec RBR-78qtwy; ISRCTN10416750	Brazil	PCOS	Upper-middle-income	FAPESP; CNPq; CAPES; INCT (Brazil)	110	Three-arm parallel-group RCT	Single academic hospital	No blinding (open-label exercise)	Continuous aerobic training (CAT), intermittent aerobic training (IAT), vs non-training control for 16 weeks	Clinical (anthropometric, metabolic, hormonal), biological (telomere length)	Not used	32	86.5
509	N-acetyl-cysteine is a novel adjuvant to clomiphene citrate in clomiphene citrate-resistant patients with polycystic ovary syndrome.	Rizk AY; Bedaiwy MA; Al-Inany HG	2005	not reported	Egypt	PCOS	Upper-middle-income	not reported	150	Placebo-controlled, double-blind randomized trial	University hospital and private infertility clinic	Double-blind (patients and monitoring physician)	NAC 1.2 g/day orally + CC 100 mg/day vs placebo + CC 100 mg/day	Clinical (ovulation, pregnancy, hormone levels)	not reported	25	67.6
510	The Benefits of an Integral HAMMAM Experience Combining Hydrotherapy and Swedish Massage on Pain, Subjective Well-Being and Quality of Life in Women with Endometriosis-Related Chronic Pelvic Pain: A RCT	Ángel Rodríguez-Ruiz, Camila Arcos-Azubel, Manuel Ruiz-Pérez, Francisco M. Peinado, Antonio Mundo-López, Ana Lara-Ramos, María del Mar Salinas-Asensio, Francisco Artacho-Cordón	2024	NCT06506708	Spain	Endometriosis	High-income	Research Chair “Innovation + Research in Human Wellbeing” (University of Granada), Grant 2022/CH/01	44	Parallel-group RCT	Single main center (hospital recruitment; intervention at Hammam Al Ándalus spa facility)	Assessors/statisticians/data managers blinded; participants & practitioners unblinded	Multisensory HAMMAM therapy: 3 × 1.5h sessions over 4 weeks including thermal circuit (warm/hot/cold baths), steam room, hot stone table, Swedish massage; final session included Kessa scrub; vs control (usual medical care + lifestyle advice)	Clinical (pain, interference, sensitization), psychological (catastrophizing, well-being), functional (PROMIS), QoL (EHP-30)	Not reported	33	89.2
511	Effect of GnRH agonist before IVF on outcomes in infertile endometriosis patients: a randomized controlled trial	Elisabet Rodríguez-Tárrega, Ana M. Monzó, Ramiro Quiroga, Patrocinio Polo-Sánchez, Pedro Fernández-Colom, Mercedes Monterde-Estrada, Edurne Novella-Maestre, Antonio Pellicer	2020	NCT01581359	Spain	Endometriosis	High-income	Ferring Pharmaceuticals (insurance only; no role in design/analysis)	200	Randomized, placebo-controlled clinical trial	Single tertiary reproductive centre	Single-blind (patients & clinicians blinded; 2 researchers unblinded for drug administration)	GnRHa (triptorelin depot monthly ×3) vs placebo saline injections ×3 before IVF	Clinical IVF and reproductive outcomes; biochemical and genetic markers	Not reported	30	81.1
512	Effects of exercise and group counselling on body composition and VO2max in overweight women with polycystic ovary syndrome.	Roessler KK; Birkebaek C; Ravn P; Andersen MS; Glintborg D	2013	not reported	Denmark	PCOS	High-income	not reported	17	Randomized cross-over design	Single-centre (Odense University Hospital / University of Southern Denmark)	not blinded	Two arms in cross-over sequence AE → GC: 8 weeks high-intensity aerobic exercise, then 8 weeks group counselling GC → AE: 8 weeks group counselling, then 8 weeks high-intensity aerobic exercise Exercise programme: 3 sessions/week High-intensity interval training (HIIT) Indoor cycling + brisk walking/running HR targets 80–100% for intervals Group counselling: Weekly 2-hour sessions x 8 weeks Led b…	Continuous (VO₂max, waist, BMI, ovarian volume)	not reported	22	59.5
513	Conservative surgery versus colorectal resection in deep endometriosis infiltrating the rectum: a randomized trial	Horace Roman, Michael Bubenheim, Emmanuel Huet, Valérie Bridoux, Chrysoula Zacharopoulou, Emile Daraï, Pierre Collinet, Jean-Jacques Tuech	2018	NCT01291576	France	Endometriosis	High-income	PHRC (French Hospital Clinical Research Program)	60	Randomized controlled parallel-arm surgical trial	Three French university hospitals (Rouen, Paris–Tenon, Lille)	Unblinded (patients informed of allocation; surgeons unblinded)	Conservative: shaving or disc excision vs Radical: segmental colorectal resection	Clinical functional outcomes (bowel, urinary, pelvic pain), quality of life, reproductive outcomes	None reported	35	94.6
514	Excision versus colorectal resection in deep endometriosis infiltrating the rectum: 5-year follow-up of patients enrolled in a randomized controlled trial.	Roman H; Tuech JJ; Huet E; Bridoux V; Khalil H; Hennetier C; Bubenheim M; Branduse LA	2019	NCT01291576	France	Endometriosis	High-income	Clinical research programme for hospitals in France (initial study); No specific funding for 5-year extension; Open-access supported by SELARL du Dr Roman	55	Parallel-arm randomized controlled trial (unblinded)	Multi-centre RCT; 5-year follow-up at a single tertiary endometriosis centre	Unblinded (surgeons and patients aware of allocation)	Conservative surgery (shaving or disc excision) vs Radical surgery (segmental colorectal resection with anastomosis)	Functional bowel and urinary symptoms; QoL; recurrence; pain; need for secondary procedures	not reported	34	91.9
515	Metformin effects on ovarian ultrasound appearance and steroidogenic function in normal-weight normoinsulinemic women with polycystic ovary syndrome: a randomized double-blind placebo-controlled clinical trial.	Romualdi D; Giuliani M; Cristello F; Fulghesu AM; Selvaggi L; Lanzone A; Guido M	2010	not reported	Italy	PCOS	High-income	not reported	23	Randomized, placebo-controlled trial (RCT)	single centre	Double-blind not explicitly mentioned	Metformin for 6 months	Clinical (menstrual cyclicity), hormonal, ultrasonographic	no	23	62.2
516	Astaxanthin ameliorates inflammation, oxidative stress, and reproductive outcomes in endometriosis patients undergoing assisted reproduction: A randomized, triple-blind placebo-controlled clinical trial.	Rostami S; Alyasin A; Saedi M; Nekoonam S; Khodarahmian M; Moeini A; Amidi F	2023	IR.TUMS.MEDICINE.REC.1400.1085	Iran	Endometriosis	Upper-middle-income	Not reported	50	Randomized, triple-blind, placebo-controlled clinical trial	ART clinic	Triple-blind (patients, clinicians, outcome assessors)	Astaxanthin (AST) 6 mg/day for 12 weeks	Biochemical (oxidative stress and inflammatory markers) and clinical (ART outcomes)	not specified	28	75.7
517	A randomized controlled trial of the efficacy of rosiglitazone and clomiphene citrate versus metformin and clomiphene citrate in women with clomiphene citrate-resistant polycystic ovary syndrome.	Rouzi AA; Ardawi MS	2006	NR	Saudi Arabia	PCOS	High-income	Supported by King Abdulaziz University (Grant No. 012/422). No pharmaceutical company funding	25	Randomized controlled, parallel-group trial, open-label with biochemical outcomes.	Single university teaching hospital.	NR	Rosiglitazone group: Rosiglitazone 4 mg twice daily + CC 100 mg/day for 5 days (day 3–7) for up to 3 cycles. Metformin group: Metformin 500 mg three times daily + identical CC protocol.	Reproductive (ovulation, follicles, pregnancy); metabolic and endocrine (insulin, glucose, HOMA, androgens, IGF axis).	NR	27	73
518	Analysis of laparoscopy on endometriosis patients with high expression of CA125.	Ruan YQ; Liang WG; Huang SH	2015	not reported	China	Endometriosis	Upper-middle-income	not reported	100	Randomized controlled trial	Hospital-based (Panyu HeXian Memorial Hospital, Guangzhou)	not specified	Laparoscopic surgery (research) vs traditional open surgery (control)	Clinical outcomes and CA125 levels	not specified	21	56.8
519	Omega-3 and vitamin E co-supplementation can improve antioxidant markers in obese/overweight women with polycystic ovary syndrome	Fatemeh Sadeghi, Amirmansour Alavi-Naeini, Farahnaz Mardanian, Mohammad Reza Ghazvini, Behzad Mahaki	2019	Not reported	Iran	PCOS	Upper-middle-income	No specific funding received	88	Randomized double-blind placebo-controlled clinical trial	University-affiliated nutrition and gynecology clinics	Double-blind (participants and investigators)	Omega-3 fatty acids 2 g/day (EPA+DHA) plus vitamin E 400 IU/day for 8 weeks vs placebo (oral paraffin)	Biochemical (oxidative stress, antioxidant markers)	Not reported	28	75.7
520	Lifestyle intervention in early pregnancy can prevent gestational diabetes in high-risk pregnant women in the UAE: a randomized controlled trial	Amena Sadiya, Vidya Jakapure, Ghida Shaar, Rama Adnan, Yohannes Tesfa	2022	NCT04273412	United Arab Emirates	GDM	High-income	Sheikh Khalifa Medical City Ajman	63	Parallel, open-label pragmatic randomized controlled trial	Single-centre (Sheikh Khalifa Medical City, Ajman)	Statistician and research assistant blinded; participants and dietitians unblinded	12-week moderate-intensity individualized lifestyle intervention (2 face-to-face + 2 phone sessions) vs usual antenatal care	Clinical, behavioral, metabolic	Not reported	31	83.8
521	The Effects of GnRHa Plus Add-Back Therapy on Quality of Life for Adolescents with Endometriosis: A Randomized Controlled Trial	Jenny Sadler Gallagher, Henry A. Feldman, Natalie A. Stokes, Marc R. Laufer, Mark D. Hornstein, Catherine M. Gordon, Amy D. DiVasta	2017	NCT00474851	USA	Endometriosis	High-income	NICHD T32 HD043034, NICHD K23 HD060066, NIH UL1 RR-025758, Boston Children’s Hospital CTSU, McCarthy Family Foundation, Thrasher Research Fund, Marriott Foundation	50	Randomized, double-blind, placebo-controlled clinical trial	Pediatric gynecology clinic, Boston Children’s Hospital	Double-blind (participants & study staff blinded to add-back assignment)	All participants: GnRHa (leuprolide depot 11.25 mg q3mo). Group 1: NA 5 mg + CEE 0.625 mg daily. Group 2: NA 5 mg + placebo daily. Add-back began 21 days after the first GnRHa injection.	Patient-reported: SF-36, BDI-II, MRS	Not used	32	86.5
522	A Daily Snack Containing Leafy Green Vegetables, Fruit, and Milk before and during Pregnancy Prevents Gestational Diabetes in a Randomized, Controlled Trial in Mumbai, India	Sirazul A. Sahariah, Ramesh D. Potdar, Meera Gandhi, Sarah H. Kehoe, Nick Brown, Harshad Sane, Patsy J. Coakley, Ella Marley-Zagar, Harsha Chopra, Devi Shivshankaran, Vanessa A. Cox, Alan A. Jackson, Barrie M. Margetts, Caroline H.D. Fall	2016	ISRCTN62811278	India	GDM	Lower-middle-income	Wellcome Trust (UK); UK Medical Research Council; UK Department for International Development; Parthenon Trust (Switzerland); ICICI Bank Social Initiatives Group (India)	6513	Parallel, individually randomized, controlled trial	Community-based (61 local centers in Mumbai slums)	Single-blind (participants unblinded; outcome assessors blinded)	Daily snack containing leafy green vegetables, fruit, and milk (0.69 MJ, 6.4 g protein) vs low-micronutrient control snack (potato, onion; 0.37 MJ, 2.4 g protein)	Clinical (GDM, glucose metabolism)	Not reported	33	89.2
523	Doppler analysis of ovarian stromal blood flow changes after treatment with metformin versus ethinyl estradiol–cyproterone acetate in women with polycystic ovarian syndrome: A randomized controlled trial	Asutosh Sahu, Priyadarshini Tripathy, Jayashree Mohanty, Attila Nagy	2019	NCT03236740	India	PCOS	Lower-middle-income	No external funding (authors report no grant funding)	101	Randomized controlled open-label trial	Single centre (SCB Medical College, Cuttack, India)	Open-label; Doppler assessor blinded to clinical data	OCP (ethinyl estradiol 35 µg + cyproterone acetate 2 mg) vs metformin 500 mg BID for 6 months	Hormonal, metabolic, Doppler blood flow outcomes	Not reported	27	73
524	Comparative study of cabergoline and hydroxychloroquine to prevent ovarian hyperstimulation syndrome (OHSS) in PCOS patients: a pilot randomized clinical trial	Salari E, Ajabi Ardehjani N, Kashani L, Jafari K, Moini A	2025	IRCT20240305061171N1	Iran	PCOS	Upper-middle-income	No funding	42	Double-blind parallel RCT	Single-centre (tertiary hospital, Tehran University of Medical Sciences)	Double-blind (participants, physicians, outcome assessors)	Cabergoline 0.5 mg/day × 8 days vs Hydroxychloroquine 400 mg/day × 8 days starting trigger day	Clinical (OHSS incidence/severity); laboratory outcomes; side effects	Not used	30	81.1
525	Effect of oral protein hydrolysate on glucose control in patients with gestational diabetes	Langeza Saleh, Nicole L. Schrier, Maaike J. Bruins, Eric A.P. Steegers, Anton H. van den Meiracker, Willy Visser	2018	NTR1848	Netherlands	GDM	High-income	DSM Food Specialties (industry)	52	Double-blind RCT	Single centre (Erasmus MC outpatient clinic)	Double blind (participants + investigators)	Protein hydrolysate 8.5 g before breakfast & dinner vs matched placebo	Clinical (glucose control), biochemical	No	29	78.4
526	Endometrial preparation for vitrified–warmed embryo transfer with or without GnRH-agonist pre-treatment in patients with polycystic ovary syndrome: a randomized controlled trial	Shabnam Salemi, Azar Yahyaei, Samira Vesali, Firouzeh Ghaffari	2021	Not reported	Iran	PCOS	Upper-middle-income	None (authors report no financial conflicts)	212	Randomized controlled trial	Single-centre (Royan Institute, Tehran)	Open-label (no blinding)	GnRH agonist (buserelin) downregulation + estradiol vs estradiol-only endometrial preparation	Reproductive / obstetric outcomes	Not reported	30	81.1
527	Effectiveness of Metformin in the Prevention of Gestational Diabetes Mellitus in Obese Pregnant Women	Willian Barbosa Sales, Iramar Baptistella do Nascimento, Guilherme Dienstmann, Matheus Leite Ramos de Souza, Grazielle Dutra da Silva, Jean Carl Silva	2018	RBR-9rpqdn; UTN U1111-1162-6908	Brazil	GDM	Upper-middle-income	Not stated (public hospital–based study)	164	Parallel randomized controlled trial	Single-centre (public maternity hospital, Joinville)	Open-label	Metformin 1000 mg/day (500 mg breakfast + 500 mg dinner) + diet + physical activity vs diet + physical activity alone	Clinical/metabolic	Not used	27	73
528	Metformin treatment in pregnant women with polycystic ovary syndrome--is reduced complication rate mediated by changes in the uteroplacental circulation?	Salvesen KA; Vanky E; Carlsen SM	2007	not reported	Norway	PCOS	High-income	Norwegian Women’s Public Health Association; Metformin provided free of charge by Weifa A/S	40	Randomised, double-blind, placebo-controlled trial	Single centre (Trondheim University Hospital, Norway)	Double-blind: participants and clinicians (including ultrasonographer) blinded to treatment	Metformin 1700 mg/day (425 mg capsules: 2/day first week, 4/day thereafter) vs placebo; given from 6–12 weeks gestation to delivery	Uterine artery PI; Umbilical artery PI; Pregnancy complications (minor/severe); Birth outcomes	not reported	26	70.3
529	Bariatric surgery for spontaneous ovulation in women living with PCOS: the BAMBINI multicentre, open-label RCT	Suhaniya N S Samarasinghe, Bianca Leca, Shahd Alabdulkader, Georgios K Dimitriadis, Allan Davasgaium, Puja Thadani, Kate Parry et al.	2024	ISRCTN16668711	UK	PCOS	High-income	Jon Moulton Charity Trust	80	Multicentre, open-label RCT	Two academic specialist obesity centres	Open-label (participants & clinicians); assessors/statisticians blinded	Vertical sleeve gastrectomy vs behavioural modification + metformin/orlistat	Clinical & biochemical (ovulation), metabolic, QoL	Yes — PCOS core outcome set used	34	91.9
530	Effects of the Consumption of Low to Medium Glycemic Index–Based Rice on the Rate of Insulin Initiation in Patients with Gestational Diabetes	Kanokporn Sanpawithayakul, Natthapon Kaewprasert, Pichaya Tantiyavarong, Sanit Wichansawakun, Charinthip Somprasit, Nattamon Tanathornkeerati, Chomchanok Srichan, Thipaporn Tharavanij	2023	TCTR20210524007	Thailand	GDM	Upper-middle-income	Thammasat University Research Fund; Thammasat University Hospital; Endocrine Society of Thailand; C.P. Foods	96	Triple-blind randomized controlled trial	Single-centre (Thammasat University Hospital Diabetes Center)	Triple-blind: participants, dietitian, and insulin-decision physician blinded	RD43 low/medium GI rice vs Thai Hom Mali high-GI rice	Clinical & metabolic	Not reported	31	83.8
531	Myo-inositol may prevent gestational diabetes onset in overweight women: a randomized, controlled trial	Angelo Santamaria, Antonino Di Benedetto, Elisabetta Petrella, Basilio Pintaudi, Francesco Corrado, Rosario D’Anna, Isabella Neri, Fabio Facchinetti	2016	NCT01047982	Italy	GDM	High-income	Not specified (institutional support from University of Messina and University of Modena & Reggio Emilia)	220	Open-label randomised controlled trial	Multicentre (University Hospitals of Messina and Modena)	Open-label (clinicians aware)	Myo-inositol 2 g + folic acid 200 mg twice daily vs folic acid 200 mg twice daily (placebo)	Clinical	Not reported	25	67.6
532	Antioxidant supplementation reduces endometriosis-related pelvic pain in humans	Nalini Santanam, Nino Kavtaradze, Ana Murphy, Celia Dominguez, Sampath Parthasarathy	2013	Not registered (trial completed before 2003)	United States	Endometriosis	High-income	NIH NICHD PO1-HD-35276-01A1	59	Randomized placebo-controlled trial	University-affiliated hospitals (Emory Clinic & Crawford Long Hospital)	Double-blind	Vitamin E 1200 IU/day + Vitamin C 1000 mg/day for 8 weeks vs placebo before surgery	Pain, inflammatory biomarkers	Not reported	29	78.4
533	Add-on effect of curcumin to dienogest in patients with endometriosis: a randomized, double-blind, controlled trial	Mahjoob Sargazi-taghazi, Habib Ghaznavi, Roghayeh Sheervalilou, Maryam Razavi, Mahdi Sepidarkish	2025	IRCT20221111056469N1	Iran	Endometriosis	Upper-middle-income	Zahedan University of Medical Sciences	86	Randomized, double-blind, placebo-controlled trial	University hospital (single centre)	Double-blind (participants, providers, assessors)	Dienogest 2 mg/day + nanocurcumin 80 mg/day vs dienogest + placebo	Pain (VAS), QOL, sexual function, imaging	No	32	86.5
534	Metformin maintains the weight loss and metabolic benefits following rimonabant treatment in obese women with polycystic ovary syndrome (PCOS)	Thozhukat Sathyapalan, Li Wei Cho, Eric S. Kilpatrick, Anne-Marie Coady, Stephen L. Atkin	2009	ISRCTN75758249	UK	PCOS	High-income	Not reported; institutional support (University of Hull)	20	Extension phase of randomized, open-label parallel RCT	Single endocrine clinic (Hull Royal Infirmary)	Open-label	3 months rimonabant → 3 months metformin vs 6 months metformin alone	Clinical (anthropometric, metabolic, hormonal)	Not reported	24	64.9
535	Use of a Web-Based Educational Intervention to Improve Knowledge of Healthy Diet and Lifestyle in Women With Gestational Diabetes Mellitus	Padaphet Sayakhot; Mary Carolan-Olah; Cheryl Steele	2016	ACTRN12615000697583	Australia	GDM	High-income	Ian Potter Foundation	116	Randomised controlled trial	Single-centre maternity diabetes clinic	Unblinded	Web-based GDM education + standard class vs standard class only	Knowledge outcomes	No	26	70.3
536	Prospective, randomized trial of metformin and vitamins for the reduction of plasma homocysteine in insulin-resistant polycystic ovary syndrome	Morey Schachter, Arieh Raziel, Devorah Strassburger, Carmela Rotem, Raphael Ron-El, Shevach Friedler	2007	Not reported	Israel	PCOS	High-income	Solgar Israel (partial lab cost support)	102	Prospective randomized controlled trial	IVF & infertility unit, tertiary referral center	None (open-label)	Group 1: Control + infertility treatment only (folic acid 0.4 mg). Group 2: Metformin 1,700 mg/day + infertility treatment. Group 3: B-vitamin preparation (B6 50 mg, folic acid 400 µg, B12 500 µg, betaine 1 g, P5P 6 mg). Group 4: Metformin + B-vitamins. Duration: 3 cycles or until pregnancy.	Metabolic (homocysteine, insulin, glucose), reproductive (clinical and ongoing pregnancy)	Not used	23	62.2
537	Micronutrients in support to the one carbon cycle for the modulation of blood fasting homocysteine in PCOS women.	Schiuma N; Costantino A; Bartolotti T; Dattilo M; Bini V; Aglietti MC; Renga M; Favilli A; Falorni A; Gerli S	2020	ISRCTN 14115156	Italy	PCOS	High-income	University of Perugia grant	32	Prospective, randomized, parallel-group, open-label, controlled trial (vs no-treatment).	Single-centre	None – open-label study.	Active group: 1 tablet/day micronutrient supplement: betaine 200 mg, L-cystine 200 mg, zinc 10 mg, niacin 16 mg, B6 1.4 mg, B2 1.4 mg, 5-methyl-THF 400 μg, methylcobalamin 2.5 μg (Impryl). Control: No treatment. Duration: 3 months.	Clinical/biochemical: fasting homocysteine (primary), AMH, testosterone, SHBG, FTI.	NR	22	59.5
538	Subcutaneous injection of depot medroxyprogesterone acetate compared with leuprolide acetate in the treatment of endometriosis-associated pain	William D. Schlaff; Sandra Ann Carson; Anthony Luciano; Doug Ross; Agneta Bergqvist	2006	Not reported	USA & Canada	Endometriosis	High-income	Pfizer Inc.	274	Phase 3 multicenter randomized comparator-controlled trial	50 clinical trial sites (USA & Canada)	Evaluator-blinded (participants unblinded to injection route)	DMPA-SC 104 mg SC q3 months ×2 vs leuprolide acetate 11.25 mg IM q3 months ×2	Pain, metabolic (BMD), QOL, safety	Not reported	31	83.8
539	Telephone lifestyle intervention to prevent diabetes in women with recent gestational diabetes mellitus attending the national health system: the LINDA-Brasil clinical trial	Maria Inês Schmidt, Paula A. Bracco, Maria A. Nunes, Kadhija A. Cherubini, Cristina D. Castilhos, Jainara Z. Spagiari, Leony M. Galliano, Ruben Ladwig, Fabricio B. Del Vecchio, Michele Drehmer, Adriana C. Forti, Cristina Façanha, Lenita Zajdenverg, Bianca de Almeida-Pititto, Rosângela R. Réa, Patrícia M. Dualib, Bruce B. Duncan	2024	NCT02327286	Brazil	GDM	Upper-middle-income	Eli Lilly Non-Communicable Diseases Partners Grant; Brazilian National Council for Scientific and Technological Development	466	Multicentre parallel randomized clinical trial	Six urban public hospitals in Brazil	Blinded assessors; participants and counsellors unblinded	Telephone-based structured 20-session lifestyle program (diet, physical activity, breastfeeding, relapse management) vs conventional care booklet	Clinical (diabetes incidence) and behavioural	Not reported	35	94.6
540	Development of protocols for randomized sham-controlled trials of complex treatment interventions: Japanese acupuncture for endometriosis-related pelvic pain.	Schnyer RN; Iuliano D; Kay J; Shields M; Wayne P	2008	not reported	USA	Endometriosis	High-income	NIH/NCCAM Grant 5 U19 AT002022	18	Pilot, randomized, sham-controlled	Single center: Japanese Acupuncture Department, New England School of Acupuncture, Newton, MA	Blinded (patients and outcome assessors)	Japanese acupuncture (manualized, individualized, 16 sessions, moxibustion, auricular points, divergent channels, extraordinary vessels) vs Sham Japanese acupuncture (Streitberger needle with modifications, sham moxibustion, sham ear acupuncture)	Feasibility, compliance, patient tolerability, safety, blinding	no	21	56.8
541	Efficacy of melatonin in the treatment of endometriosis: A phase II, randomized, double-blind, placebo-controlled trial	André Schwertner, Claudia C. Conceição dos Santos, Gislene Dalferth Costa, Alícia Deitos, Andressa de Souza, Izabel Cristina Custodio de Souza, Iraci L.S. Torres, João Sabino L. da Cunha Filho, Wolnei Caumo	2013	Not reported	Brazil	Endometriosis	Upper-middle-income	CAPES; CNPq; Postgraduate Research Group (HCPA); FAPERGS (Brazil)	40	Randomized controlled trial	Single centre (Hospital de Clínicas de Porto Alegre)	Double-blind (patients, evaluators, clinicians)	Melatonin 10 mg nightly × 8 weeks vs identical placebo	Pain scores; sleep quality; BDNF; analgesic use	Not reported	32	86.5
542	Short-term combined treatment with liraglutide and metformin leads to significant weight loss in obese women with polycystic ovary syndrome and previous poor response to metformin	Jensterle Sever M; Kocjan T; Pfeifer M; Kravos NA; Janez A	2014	NCT01911468	Slovenia	PCOS	High-income	Grant 20120047, University Medical Center Ljubljana	40	Randomized controlled trial	Single centre (University Medical Center Ljubljana)	Open-label (no blinding)	Metformin 1000 mg BID vs Liraglutide 1.2 mg daily vs Combination	Anthropometric, metabolic, endocrine, safety	Not used	26	70.3
543	Effects of melatonin administration on mental health parameters, metabolic and genetic profiles in women with polycystic ovary syndrome: A randomized, double-blind, placebo-controlled trial	Azade Shabani, Fatemeh Foroozanfard, Elham Kavossian, Esmat Aghadavod, Vahidreza Ostadmohammadi, Russel J. Reiter, Tahereh Eftekhar, Zatollah Asemi	2019	IRCT2017090533941N23	Iran	PCOS	Upper-middle-income	Vice-Chancellor for Research, Shahid Beheshti University of Medical Sciences, Iran	58	Randomized controlled trial	Single centre (Taleghani Hospital, Tehran)	Double-blind (participants and researchers blinded)	Melatonin 10 mg/day vs placebo for 12 weeks	Metabolic, mental health, genetic	Not reported	31	83.8
544	The effect of probiotic supplementation on the risk of gestational diabetes mellitus among high-risk pregnant women	Ali Shahriari, Elham Karimi, Mohammadali Shahriari, Neda Aslani, Maryam Khooshideh, Arman Arab	2021	IRCT2016110111020N6	Iran	GDM	Upper-middle-income	Tehran University of Medical Sciences	507	Parallel, double-blind randomized placebo-controlled trial	Single-centre (Arash Women’s Hospital, Tehran)	Double-blind (participants, clinicians, lab staff)	Probiotic capsule 500 mg daily (L. acidophilus LA1, B. longum sp54cs, B. bifidum sp9cs) vs identical placebo; 14–24 weeks GA	Clinical, metabolic, neonatal	Not used	33	89.2
545	A randomized controlled trial of a new technique for laparoscopic management of ovarian endometriosis: preventing recurrence and keeping ovarian reserve	Mohamed F. Shaltout, Ahmad elsheikhah, Ahmed M. Maged, Moutaz M. Elsherbini, Sherif S. Zaki, Sherif Dahab, Rasha O. Elkomy	2019	NCT02947724	Egypt	Endometriosis	Lower-middle-income	Self-funded	200	Randomized controlled surgical trial	University teaching hospital (Kasr El Aini Hospital, Cairo University)	None (open-label surgical trial)	Group D: Drainage only. Group C: Cystectomy. Group DS: Drainage + Surgicel insertion (4–8 pieces). Group CS: Cystectomy + Surgicel insertion. No postoperative hormonal therapy.	Clinical (recurrence), ovarian reserve (AMH/AFC), spontaneous pregnancy	Not used	28	75.7
546	Antenatal dexamethasone vs betamethasone on glycemic control in mild gestational diabetes: a randomized clinical trial	Fathimath Shamaa Shareef, Jesrine Hong, Rahmah Saaid, Mukhri Hamdan, Siti Zawiah Omar, Peng Chiong Tan	2025	ISRCTN11357822	Malaysia	GDM	Upper-middle-income	Department of Obstetrics & Gynaecology, Universiti Malaya	151	Randomized controlled clinical trial	Single tertiary university hospital	Open-label (participants & investigators unblinded)	Dexamethasone 4×6mg IM q12h vs Betamethasone 2×11.4mg IM q24h	Glycemic episodes; maternal; neonatal	No	30	81.1
547	The effects of portfolio moderate-carbohydrate and ketogenic diets on anthropometric indices, metabolic status, and hormonal levels in overweight or obese women with polycystic ovary syndrome: a randomized controlled trial	Maryam Sharifi; Amir Saber; Jalal Moludi; Yahya Salimi; Alireza Jahan-Mihan	2024	IRCT20200912048693N3	Iran	PCOS	Upper-middle-income	Not explicitly stated	46	Parallel randomized controlled trial (open-label diet)	Single academic outpatient clinic (Kermanshah University of Medical Sciences)	Participants unblinded; outcome assessors and analysts blinded	Portfolio moderate-carbohydrate plant-based diet (40% CHO) vs ketogenic diet (≤10% CHO, 70% fat) for 8 weeks	Anthropometric, metabolic, hormonal	Not reported	32	86.5
548	Comparison between two clomiphene citrate protocols for induction of ovulation in clomiphene-resistant polycystic ovary syndrome	Mervat Sheikh-El-Arab Elsedeek, Eman Elgindy	2014	ACTRN12611000639921	Egypt	PCOS	Lower-middle-income	Not reported	220	Double-blind randomized controlled trial	University infertility clinics	Double-blind (placebo tablets matched duration)	CC 200 mg/day × 5 days vs CC 100 mg/day × 10 days	Ovulation, pregnancy, live birth	Not reported	27	73
549	Letrozole and human menopausal gonadotropin for ovulation induction in clomiphene-resistant polycystic ovary syndrome patients: A randomized controlled study	Shaoquan Shi, Ting Hong, Fangfang Jiang, Yuan Zhuang, Le Chen, Xiaoling Huang	2020	Not reported	China	PCOS	Upper-middle-income	Not reported	96	Randomized controlled trial (parallel)	Single tertiary hospital gynecology outpatient clinic	Open-label	Letrozole 5 mg/day orally for 5 days (cycle days 3–7) vs HMG 75 IU/day IM for 5 days (cycle days 3–7); HCG trigger when follicle ≥18 mm	Reproductive, hormonal, safety	Not reported	29	78.4
550	A randomized, placebo-controlled, double-blind study of hysteroscopic-guided pertubal diluted bupivacaine infusion for endometriosis-associated chronic pelvic pain	Tarek Shokeir, Sherif Mousa	2015	AEARCTR-0000573	Egypt	Endometriosis	Lower-middle-income	Not reported	60	Randomized, placebo-controlled, double-blind RCT	Single center (Mansoura University Hospital)	Double-blind (patients, investigators, outcome assessors)	10 mL bupivacaine 0.25% + 100 mL Ringer vs 10 mL sterile water + 100 mL Ringer	Pain (VAS, VRSmonthly), satisfaction	Not reported	31	83.8
551	Comparison of myo-inositol and metformin on glycemic control, lipid profiles, and gene expression related to insulin and lipid metabolism in women with polycystic ovary syndrome: a randomized controlled clinical trial	Maryam Shokrpour, Fatemeh Foroozanfard, Faraneh Afshar Ebrahimi, Zahra Vahedpoor, Esmat Aghadavod, Amir Ghaderi, Zatollah Asemi	2019	IRCT2017082733941N10	Iran	PCOS	Upper-middle-income	No external funding reported	53	Randomized controlled clinical trial	Gynecology clinic (Kosar Clinic, Arak)	Open-label for participants; outcome assessors not described as blinded	Myo-inositol group: 2 g myo-inositol + 200 mg folic acid twice daily × 12 weeks. Metformin group: 500 mg metformin three times daily × 12 weeks.	Metabolic, endocrine, molecular outcomes	No	28	75.7
552	Low glycaemic index diets improve glucose tolerance and body weight in women with previous history of gestational diabetes: a six months randomized trial	Sangeetha Shyam, Fatimah Arshad, Rohana Abdul Ghani, Norasyikin A. Wahab, Nik Shanita Safii, Mohd Yusof Barakatun Nisak, Karuthan Chinna, Nor Azmi Kamaruddin	2013	Malaysian National Medical Research Register (NMRR-5183)	Malaysia	GDM	Upper-middle-income	International Medical University, Kuala Lumpur; Gardenia Bakeries KL (voucher donation)	77	Parallel, randomized controlled trial	Single-centre (tertiary hospital endocrine clinic, Kuala Lumpur)	Open-label (participants and nutritionists unblinded; statisticians blinded)	Conventional healthy dietary recommendation (CHDR) vs CHDR + low-GI education; individualized energy restriction; 6-month intervention	Clinical, behavioral, biochemical	Not reported	26	70.3
553	Lactobacillus bulgaricus improves antioxidant capacity of black garlic in the prevention of gestational diabetes mellitus: a randomized control trial	Lihui Si, Ruixin Lin, Yan Jia, Wenwen Jian, Qing Yu, Min Wang, Shuli Yang	2019	ChiCTR1900022115	China	GDM	Upper-middle-income	Not reported	226	Randomized controlled trial (parallel-group)	Single-centre (Second Hospital of Jilin University)	Double-blind (participants, investigators, care providers)	5 g/day black garlic fermented with L. bulgaricus vs black garlic alone	Glycaemic, biochemical, pregnancy, perinatal outcomes	Not reported	27	73
554	Evaluating the equivalence of clomiphene citrate with and without metformin in ovulation induction in PCOS patients	T.I. Siebert; T.F. Kruger; C. Lombard	2009	Not reported	South Africa	PCOS	Upper-middle-income	Not reported	107	Prospective randomized controlled trial	Academic hospitals and fertility institute	Open-label	Metformin 850 mg BID for ≥6 weeks + clomiphene citrate (50–150 mg) vs clomiphene citrate alone for up to 4 cycles	Reproductive (ovulation)	Not reported	29	78.4
555	Metformin compared with glyburide for the management of gestational diabetes	Jean Carl Silva, Carina Pacheco, Juliana Bizato, Bárbara Vicente de Souza, Thaís Engel Ribeiro, Anna Maria Bertini	2010	Not reported	Brazil	GDM	Upper-middle-income	None stated	81	Randomized controlled trial	Multicentre (3 hospitals in Joinville, Brazil)	Open-label	Metformin (500–2500 mg/day) vs glyburide (2.5–20 mg/day)	Maternal metabolic + neonatal outcomes	Not reported	30	81.1
556	Effect of Physical Activity and/or Healthy Eating on GDM Risk: The DALI Lifestyle Study	David Simmons, Roland Devlieger, André van Assche, Goele Jans, Sander Galjaard, Rosa Corcoy, Juan M. Adelantado, Fidelma Dunne, Gernot Desoye, Jürgen Harreiter, Alexandra Kautzky-Willer, Peter Damm, Elisabeth Mathiesen, Dorte Jensen, Liselotte Andersen, Annunziata Lapolla, Maria Dalfra, Alessandra Bertolotto, Ewa Wender-Ozegowska, Agnieszka Zawiejska, David Hill, Frank Snoek, Judith Jelsma, Mirei…	2017	ISRCTN70595832	Multicountry (11 centers across 9 European countries)	GDM	High-income	EU FP7 Programme (Grant 242187); National/Institutional co-funding (Denmark, Netherlands, Poland, Spain, UK)	436	Multicentre randomized controlled trial (factorial design)	Antenatal clinics in 11 centers across 9 European countries	Single-blind (assessors/statisticians blinded; participants unblinded)	HE, PA, or HE+PA motivational coaching (5 face-to-face + 4 calls) targeting GWG <5 kg vs usual care	Clinical and metabolic	Not specified	34	91.9
557	The treatment of booking gestational diabetes mellitus (TOBOGM) pilot randomised controlled trial.	Simmons D; Nema J; Parton C; Vizza L; Robertson A; Rajagopal R; Ussher J; Perz J	2018	ACTRN12615000974505 (Australia New Zealand Clinical Trials Registry)	Australia	GDM	High-income	Western Sydney University	22	Pilot randomised controlled trial (feasibility and acceptability study)	Hospital-based antenatal booking clinic (Campbelltown Hospital)	Participants, midwives, obstetricians, diabetes clinic staff, research staff blinded	Immediate GDM treatment (clinic referral, self-monitoring, dietitian input, medications as needed) vs deferred treatment (no referral until 24–28 week OGTT if diagnosed)	Maternal and neonatal outcomes: LGA/SGA, NICU admission, gestational age at delivery, stillbirth, maternal glycaemic measures	not mentioned	24	64.9
558	Treatment of Gestational Diabetes Mellitus Diagnosed Early in Pregnancy	Simmons D, McLean M, Cheung NW, et al.	2023	ACTRN12616000924459	Australia, Austria, Sweden, India	GDM	High-income	National Health & Medical Research Council (Australia) + partner institutions	802	Parallel-group 1:1 RCT	17 hospitals (multinational)	Participants and clinicians blinded to OGTT category via decoys; laboratories and adjudicators blinded	Immediate GDM management (diet, SMBG, insulin/metformin as needed) vs deferred/no treatment	Maternal + neonatal clinical outcomes	Not reported	36	97.3
559	A randomized feasibility trial of time-restricted eating during pregnancy in people with increased risk of gestational diabetes	Hanna M.S. Skarstad, Kamilla L. Haganes, Md Abu Jafar Sujan, Trine M. Gellein, Mariell K. Johansen, Kjell Å. Salvesen, John A. Hawley, Trine Moholdt	2024	NCT03803072	Norway	GDM	High-income	Norwegian University of Science and Technology (NTNU), Novo Nordisk Foundation (NNF19SA058975), EFSD Future Leaders Award	32	Parallel randomized controlled trial	Single-centre (NTNU and St. Olav’s Hospital, Trondheim)	Open-label (participants unblinded; analysts blinded)	5-week TRE (≤10-h eating window, ~09:00–19:00) vs usual care	Clinical, metabolic, and behavioral	Not reported	31	83.8
[truncated: 136 more rows]

## Sheet: Variable Definitions
CONSORT score (n/37): Number of CONSORT checklist items reported out of 37
[truncated: 11 more rows]
